# Supplementary material for: Cuproptosis-related gene DLAT serves as a prognostic biomarker for immunotherapy in clear cell renal cell carcinoma: multi-database and experimental verification
Source: Aging (Albany NY). 2023 Nov 7;15(21):12314–29. doi: 10.18632/aging.205181 (PMC10683628; doi:10.18632/aging.205181)
Supplement: Supplementary Material 1 [file aging-15-205181-s001.xlsx]

## Sheet: S1
Supplementary Material 1. 182 genes correlated to DLAT.
Query	Gene	cor	pvalue
DLAT	CHD4	-0.728002	2.03e-90
DLAT	LZTR1	-0.723682	7.26e-89
DLAT	ISY1	-0.718695	4.15e-87
DLAT	NAA10	-0.712042	8.01e-85
DLAT	SNRPA	-0.711462	1.26e-84
DLAT	INAFM1	-0.703572	5.27e-82
DLAT	GPD2	0.700137	6.85e-81
DLAT	IMMT	0.700496	5.25e-81
DLAT	PDCD6IP	0.700647	4.69e-81
DLAT	GNG12	0.701356	2.77e-81
DLAT	CREBL2	0.701681	2.17e-81
DLAT	MORF4L1P1	0.701827	1.95e-81
DLAT	AQR	0.702051	1.65e-81
DLAT	ZNF28	0.702124	1.56e-81
DLAT	SELENOI	0.702149	1.53e-81
DLAT	IQGAP2	0.702182	1.49e-81
DLAT	GMFB	0.702346	1.32e-81
DLAT	HSPA4L	0.702561	1.13e-81
DLAT	ZBTB33	0.703839	4.31e-82
DLAT	STAM2	0.704956	1.85e-82
DLAT	AGL	0.705184	1.56e-82
DLAT	AFF4	0.705397	1.33e-82
DLAT	SMCR8	0.705675	1.08e-82
DLAT	SMG8	0.705814	9.68e-83
DLAT	GHITM	0.70602	8.27e-83
DLAT	AZI2	0.70647	5.88e-83
DLAT	HLTF	0.706867	4.34e-83
DLAT	CLPX	0.707892	1.98e-83
DLAT	SNX13	0.708366	1.38e-83
DLAT	HMG20A	0.708452	1.29e-83
DLAT	ARCN1	0.709404	6.2e-84
DLAT	MTMR12	0.71011	3.59e-84
DLAT	TOM1L1	0.711092	1.68e-84
DLAT	ZNF106	0.711135	1.62e-84
DLAT	CHUK	0.711365	1.36e-84
DLAT	GFM1	0.711483	1.24e-84
DLAT	SNX2	0.711634	1.1e-84
DLAT	PCCA	0.711774	9.88e-85
DLAT	CAPZA2	0.712419	5.97e-85
DLAT	PLEKHB2	0.712822	4.36e-85
DLAT	MKLN1	0.71308	3.56e-85
DLAT	UQCRC2	0.713506	2.55e-85
DLAT	SPG11	0.713591	2.39e-85
DLAT	MSANTD4	0.714443	1.22e-85
DLAT	PPM1A	0.714705	9.93e-86
DLAT	ATP7A	0.714728	9.75e-86
DLAT	SLC39A9	0.714856	8.81e-86
DLAT	TRUB1	0.715291	6.25e-86
DLAT	OSBPL8	0.715326	6.08e-86
DLAT	INIP	0.715411	5.68e-86
DLAT	M6PR	0.71617	3.11e-86
DLAT	CUL3	0.716751	1.96e-86
DLAT	HADHB	0.716986	1.63e-86
DLAT	UBR1	0.717565	1.03e-86
DLAT	GOLGA7	0.718067	6.87e-87
DLAT	COPB1	0.718281	5.78e-87
DLAT	TMEM245	0.718534	4.72e-87
DLAT	CLTC	0.719747	1.78e-87
DLAT	TMX4	0.719816	1.68e-87
DLAT	CAND1	0.719955	1.51e-87
DLAT	ZNF252P	0.720054	1.39e-87
DLAT	CAB39	0.720077	1.36e-87
DLAT	SYPL1	0.720117	1.32e-87
DLAT	ABCC4	0.720141	1.3e-87
DLAT	DENND4C	0.720889	7.07e-88
DLAT	DARS2	0.721243	5.31e-88
DLAT	ZNF664	0.721421	4.6e-88
DLAT	UHMK1	0.721784	3.42e-88
DLAT	OPA1	0.721892	3.13e-88
DLAT	CIPC	0.722203	2.43e-88
DLAT	NEK4	0.722313	2.22e-88
DLAT	STK24	0.7229	1.38e-88
DLAT	TRIM44	0.723141	1.13e-88
DLAT	PJA2	0.723355	9.49e-89
DLAT	TRAPPC8	0.723426	8.95e-89
DLAT	ACADM	0.724181	4.82e-89
DLAT	PNPLA8	0.725097	2.27e-89
DLAT	DNAJC14	0.725364	1.82e-89
DLAT	ATP5F1B	0.726202	9.08e-90
DLAT	PTPN11	0.726386	7.79e-90
DLAT	ASXL2	0.726651	6.25e-90
DLAT	ATP10D	0.727053	4.48e-90
DLAT	TMLHE	0.727529	3.01e-90
DLAT	LGR4	0.727788	2.42e-90
DLAT	SPIRE1	0.727886	2.23e-90
DLAT	CERT1	0.729165	7.64e-91
DLAT	RBL2	0.729321	6.7e-91
DLAT	ATAD1	0.729458	5.97e-91
DLAT	NCOA2	0.729535	5.6e-91
DLAT	CEBPZ	0.729537	5.59e-91
DLAT	SLC31A1	0.729615	5.23e-91
DLAT	HMGCS1	0.729731	4.75e-91
DLAT	VWA8	0.730089	3.51e-91
DLAT	COG5	0.73053	2.42e-91
DLAT	KLHL8	0.731126	1.46e-91
DLAT	DBT	0.732	6.95e-92
DLAT	SBF2	0.73216	6.06e-92
DLAT	COPS4	0.732936	3.13e-92
DLAT	GSPT1	0.733954	1.31e-92
DLAT	HACD3	0.734277	9.9e-93
DLAT	ZFR	0.734523	8.01e-93
DLAT	MTREX	0.734769	6.48e-93
DLAT	MEGF9	0.73565	3.03e-93
DLAT	RNF111	0.736585	1.35e-93
DLAT	IPO8	0.740084	6.27e-95
DLAT	OSBPL1A	0.741073	2.61e-95
DLAT	YIPF6	0.741749	1.43e-95
DLAT	NUDT21	0.741896	1.26e-95
DLAT	MPP5	0.742712	6.07e-96
DLAT	SECISBP2L	0.743101	4.28e-96
DLAT	ZW10	0.744163	1.65e-96
DLAT	UBE4A	0.745375	5.53e-97
DLAT	USP8	0.747012	1.25e-97
DLAT	ARPP19	0.747719	6.54e-98
DLAT	PDHX	0.748468	3.29e-98
DLAT	ATP1A1	0.749058	1.91e-98
DLAT	CAPRIN1	0.749205	1.67e-98
DLAT	MMUT	0.749519	1.25e-98
DLAT	TRAPPC11	0.749625	1.13e-98
DLAT	MTM1	0.749834	9.34e-99
DLAT	IARS2	0.749862	9.1e-99
DLAT	HSPA8	0.750039	7.73e-99
DLAT	PHKB	0.750138	7.05e-99
DLAT	LMBR1	0.750266	6.26e-99
DLAT	GTF2I	0.750399	5.54e-99
DLAT	ARHGAP5	0.750827	3.72e-99
DLAT	ITCH	0.752161	1.07e-99
DLAT	TFAM	0.754538	1.15e-100
DLAT	ZYG11B	0.755276	5.71e-101
DLAT	EIF3L	0.756326	2.1e-101
DLAT	UBQLN1	0.756576	1.66e-101
DLAT	LNX2	0.758301	3.17e-102
DLAT	POLR2B	0.758899	1.78e-102
DLAT	UBE3C	0.759393	1.1e-102
DLAT	TM9SF2	0.760555	3.57e-103
DLAT	XRN2	0.761336	1.67e-103
DLAT	LRBA	0.762231	6.93e-104
DLAT	RDX	0.762798	3.97e-104
DLAT	XPO4	0.763785	1.5e-104
DLAT	CPNE3	0.764624	6.53e-105
DLAT	ABHD2	0.765022	4.39e-105
DLAT	NIPA2	0.765045	4.29e-105
DLAT	G3BP2	0.765052	4.26e-105
DLAT	SPOPL	0.766519	9.84e-106
DLAT	UEVLD	0.767744	2.87e-106
DLAT	NCOA4	0.767897	2.46e-106
DLAT	ITFG1	0.76843	1.43e-106
DLAT	IPO7	0.769246	6.27e-107
DLAT	MMGT1	0.770576	1.61e-107
DLAT	SEC24B	0.772706	1.8e-108
DLAT	NNT	0.774021	4.6e-109
DLAT	RNF141	0.774753	2.14e-109
DLAT	FBXW11	0.775265	1.25e-109
DLAT	BTBD1	0.775603	8.79e-110
DLAT	IREB2	0.77677	2.57e-110
DLAT	SUCLA2	0.777621	1.04e-110
DLAT	NDUFS1	0.77785	8.17e-111
DLAT	UHRF1BP1L	0.778195	5.66e-111
DLAT	KBTBD4	0.779637	1.21e-111
DLAT	GFM2	0.780162	6.9e-112
DLAT	EIF4G2	0.781022	2.73e-112
DLAT	HBP1	0.781595	1.47e-112
DLAT	CUL5	0.782077	8.7e-113
DLAT	CNOT1	0.784154	8.99e-114
DLAT	LRPPRC	0.784248	8.11e-114
DLAT	ARFGEF2	0.786129	1.01e-114
DLAT	API5	0.786917	4.22e-115
DLAT	WASHC5	0.787093	3.47e-115
DLAT	SPTY2D1	0.789568	2.15e-116
DLAT	ZFP91	0.791071	3.9e-117
DLAT	AFG3L2	0.792522	7.4e-118
DLAT	CTR9	0.793138	3.64e-118
DLAT	TBC1D14	0.796716	5.62e-120
DLAT	CHM	0.79722	3.11e-120
DLAT	USO1	0.80084	4.14e-122
DLAT	DLD	0.80152	1.82e-122
DLAT	ZNF770	0.812594	1.79e-128
DLAT	OSBP	0.821821	8.56e-134
DLAT	SLC30A9	0.825348	6.57e-136
DLAT	APOOL	0.827548	2.97e-137
DLAT	IDH3A	0.837181	2.27e-143
DLAT	TMEM184C	0.841189	4.92e-146
