# Supplementary material for: Cuproptosis-related gene DLAT serves as a prognostic biomarker for immunotherapy in clear cell renal cell carcinoma: multi-database and experimental verification
Source: Aging (Albany NY). 2023 Nov 7;15(21):12314–29. doi: 10.18632/aging.205181 (PMC10683628; doi:10.18632/aging.205181)
Supplement: Supplementary Material 2 [file aging-15-205181-s002.xlsx]

## Sheet: S2
Supplementary Material 2. GO analysis of co-expressed genes.
ONTOLOGY	ID	Description	GeneRatio	BgRatio	pvalue	p.adjust	qvalue	geneID	Count
BP	GO:0048193	Golgi vesicle transport	15/171	372/18862	1.56787e-06	0.00343364	0.00321661	ARCN1/SNX2/CAPZA2/CUL3/GOLGA7/COPB1/TRAPPC8/SPIRE1/COG5/ZW10/TRAPPC11/SEC24B/ARFGEF2/TBC1D14/USO1	15
BP	GO:0007007	inner mitochondrial membrane organization	6/171	56/18862	1.13429e-05	0.00948208	0.00888276	IMMT/GHITM/OPA1/ATP5F1B/AFG3L2/APOOL	6
BP	GO:0006099	tricarboxylic acid cycle	5/171	34/18862	1.29892e-05	0.00948208	0.00888276	NNT/IREB2/SUCLA2/DLD/IDH3A	5
BP	GO:0006888	endoplasmic reticulum to Golgi vesicle-mediated transport	10/171	206/18862	1.902e-05	0.0104134	0.00975524	ARCN1/CAPZA2/CUL3/COPB1/TRAPPC8/COG5/ZW10/TRAPPC11/SEC24B/USO1	10
BP	GO:0015980	energy derivation by oxidation of organic compounds	11/171	278/18862	4.8109e-05	0.0195232	0.0182892	GPD2/AGL/GHITM/UQCRC2/PHKB/NNT/IREB2/SUCLA2/NDUFS1/DLD/IDH3A	11
BP	GO:0045333	cellular respiration	9/171	187/18862	5.34882e-05	0.0195232	0.0182892	GPD2/GHITM/UQCRC2/NNT/IREB2/SUCLA2/NDUFS1/DLD/IDH3A	9
BP	GO:0009060	aerobic respiration	6/171	86/18862	0.000131273	0.0410696	0.0384737	UQCRC2/NNT/IREB2/SUCLA2/DLD/IDH3A	6
BP	GO:0000041	transition metal ion transport	7/171	127/18862	0.00015968	0.0437124	0.0409495	ATP7A/SLC39A9/CLTC/SLC31A1/MMGT1/IREB2/SLC30A9	7
BP	GO:0046825	regulation of protein export from nucleus	4/171	32/18862	0.000192351	0.0468053	0.0438469	PPM1A/UHMK1/PTPN11/XPO4	4
CC	GO:0005759	mitochondrial matrix	19/176	476/19520	6.45585e-08	2.18208e-05	1.82123e-05	CLPX/GFM1/PCCA/HADHB/DARS2/ACADM/ATP5F1B/TMLHE/DBT/PDHX/MMUT/IARS2/TFAM/SUCLA2/NDUFS1/GFM2/LRPPRC/DLD/IDH3A	19
CC	GO:0009295	nucleoid	6/176	44/19520	2.62085e-06	0.000295282	0.000246452	CLPX/HADHB/ATP5F1B/DBT/TFAM/LRPPRC	6
CC	GO:0042645	mitochondrial nucleoid	6/176	44/19520	2.62085e-06	0.000295282	0.000246452	CLPX/HADHB/ATP5F1B/DBT/TFAM/LRPPRC	6
CC	GO:0000151	ubiquitin ligase complex	11/176	289/19520	6.53575e-05	0.00552271	0.00460942	LZTR1/MKLN1/CUL3/UBR1/CAND1/KLHL8/UBE4A/ZYG11B/SPOPL/FBXW11/CUL5	11
CC	GO:0031461	cullin-RING ubiquitin ligase complex	8/176	163/19520	0.000118068	0.00798141	0.00666153	LZTR1/CUL3/CAND1/KLHL8/ZYG11B/SPOPL/FBXW11/CUL5	8
CC	GO:0045239	tricarboxylic acid cycle enzyme complex	3/176	14/19520	0.000243797	0.0137339	0.0114627	DBT/SUCLA2/DLD	3
CC	GO:0031463	Cul3-RING ubiquitin ligase complex	4/176	36/19520	0.000300314	0.0145009	0.0121029	LZTR1/CUL3/KLHL8/SPOPL	4
CC	GO:1990204	oxidoreductase complex	6/176	111/19520	0.000510997	0.0215896	0.0180194	GPD2/UQCRC2/DBT/PDHX/NDUFS1/DLD	6
CC	GO:0032592	integral component of mitochondrial membrane	5/176	85/19520	0.00103166	0.0343022	0.0286296	IMMT/GHITM/SPIRE1/AFG3L2/APOOL	5
CC	GO:0098573	intrinsic component of mitochondrial membrane	5/176	86/19520	0.00108746	0.0343022	0.0286296	IMMT/GHITM/SPIRE1/AFG3L2/APOOL	5
CC	GO:0030662	coated vesicle membrane	7/176	182/19520	0.00133913	0.0343022	0.0286296	ARCN1/M6PR/COPB1/CLTC/HSPA8/SEC24B/USO1	7
CC	GO:0030135	coated vesicle	9/176	295/19520	0.00146662	0.0343022	0.0286296	ARCN1/ATP7A/M6PR/COPB1/CLTC/YIPF6/HSPA8/SEC24B/USO1	9
CC	GO:0030120	vesicle coat	4/176	55/19520	0.00152229	0.0343022	0.0286296	ARCN1/COPB1/CLTC/SEC24B	4
CC	GO:0031304	intrinsic component of mitochondrial inner membrane	4/176	55/19520	0.00152229	0.0343022	0.0286296	IMMT/GHITM/AFG3L2/APOOL	4
CC	GO:0031305	integral component of mitochondrial inner membrane	4/176	55/19520	0.00152229	0.0343022	0.0286296	IMMT/GHITM/AFG3L2/APOOL	4
CC	GO:0005743	mitochondrial inner membrane	12/176	493/19520	0.00176499	0.0365197	0.0304805	GPD2/IMMT/GHITM/CLPX/UQCRC2/HADHB/OPA1/ATP5F1B/NNT/NDUFS1/AFG3L2/APOOL	12
CC	GO:0098800	inner mitochondrial membrane protein complex	6/176	142/19520	0.00183679	0.0365197	0.0304805	IMMT/UQCRC2/ATP5F1B/NDUFS1/AFG3L2/APOOL	6
CC	GO:0042470	melanosome	5/176	106/19520	0.00273961	0.0481135	0.040157	PDCD6IP/CLTC/SYPL1/ATP1A1/HSPA8	5
CC	GO:0048770	pigment granule	5/176	106/19520	0.00273961	0.0481135	0.040157	PDCD6IP/CLTC/SYPL1/ATP1A1/HSPA8	5
CC	GO:0098798	mitochondrial protein-containing complex	8/176	265/19520	0.00284695	0.0481135	0.040157	IMMT/CLPX/UQCRC2/ATP5F1B/DBT/NDUFS1/AFG3L2/APOOL	8
CC	GO:0045240	dihydrolipoyl dehydrogenase complex	2/176	10/19520	0.0034687	0.0558296	0.0465971	DBT/DLD	2
MF	GO:0016887	ATPase activity	14/172	478/18337	0.000171254	0.0399899	0.0364301	CHD4/AQR/HLTF/CLPX/ATP7A/ABCC4/ATP5F1B/ATP10D/ATAD1/VWA8/MTREX/ATP1A1/HSPA8/AFG3L2	14
MF	GO:0004842	ubiquitin-protein transferase activity	13/172	429/18337	0.000211028	0.0399899	0.0364301	HLTF/CUL3/UBR1/TRIM44/PJA2/RNF111/UBE4A/ITCH/UBE3C/RNF141/FBXW11/CUL5/ZFP91	13
MF	GO:0019787	ubiquitin-like protein transferase activity	13/172	452/18337	0.000348808	0.0440661	0.0401436	HLTF/CUL3/UBR1/TRIM44/PJA2/RNF111/UBE4A/ITCH/UBE3C/RNF141/FBXW11/CUL5/ZFP91	13
