# Supplementary material for: Cuproptosis-related gene DLAT serves as a prognostic biomarker for immunotherapy in clear cell renal cell carcinoma: multi-database and experimental verification
Source: Aging (Albany NY). 2023 Nov 7;15(21):12314–29. doi: 10.18632/aging.205181 (PMC10683628; doi:10.18632/aging.205181)
Supplement: Supplementary Material 3 [file aging-15-205181-s003.xlsx]

## Sheet: S3
Supplementary Material 3. KEGG analysis of co-expressed genes.
ID	Description	GeneRatio	BgRatio	pvalue	p.adjust	qvalue	geneID	Count
hsa00280	Valine, leucine and isoleucine degradation	7/83	48/8191	4.46971281170625E-07	0.0000755381465178356	0.000073397389329071	34/1629/1738/3032/3157/4594/5095	7
hsa00640	Propanoate metabolism	5/83	32/8191	0.000015368217570013	0.0012986143846661	0.0012618115478537	1629/1738/4594/5095/8803	5
hsa04144	Endocytosis	10/83	251/8191	0.00020739732045105	0.0116833823854092	0.0113522743825838	10564/830/1213/3312/83737/10015/6643/10254/9101/9897	10
