# Supplementary material for: Cuproptosis-related gene DLAT serves as a prognostic biomarker for immunotherapy in clear cell renal cell carcinoma: multi-database and experimental verification
Source: Aging (Albany NY). 2023 Nov 7;15(21):12314–29. doi: 10.18632/aging.205181 (PMC10683628; doi:10.18632/aging.205181)
Supplement: Supplementary Material 4 [file aging-15-205181-s004.xlsx]

## Sheet: S4
Supplementary Material 4. GSEA functional analysis in different DLAT expression levels.
ID	Description	setSize	enrichmentScore	NES	pvalue	p.adjust	qvalues	rank	leading_edge	core_enrichment
GOBP_CELLULAR_MONOVALENT_INORGANIC_CATION_HOMEOSTASIS	GOBP_CELLULAR_MONOVALENT_INORGANIC_CATION_HOMEOSTASIS	114	0.57078	2.42438	1e-10	1.59425e-07	1.46868e-07	8599	tags=36%, list=15%, signal=31%	ATP6V0A4/ATP6V1G3/ATP6V0D2/SLC4A1/CFTR/SLC4A9/SLC9A4/ATP6V1B1/SLC9A2/ATP6V1C2/ATP4B/TTPA/SLC26A3/ATP6V1A/AVPR1A/ATP1A1/SLC4A4/CA2/NEDD4L/ATP12A/DMXL1/TFAP2B/RAB39A/LRRK2/ATP5F1B/BCL2/SLC4A5/CLIC4/CLCN3/MAPK1/SLC12A2/ATP6V1C1/ATP6V1D/ATP1B1/ATP6AP2/AGTR2/DMXL2/KCNMA1/UBE3A/ATP6V1H/ATP6V1B2
GOBP_MONOVALENT_INORGANIC_CATION_HOMEOSTASIS	GOBP_MONOVALENT_INORGANIC_CATION_HOMEOSTASIS	160	0.50593	2.23488	1e-10	1.59425e-07	1.46868e-07	8599	tags=34%, list=15%, signal=29%	ATP6V0A4/ATP6V1G3/ATP6V0D2/SLC4A1/SLC12A3/CFTR/RHCG/SLC4A9/OTC/SLC9A4/ATP6V1B1/SLC9A2/ATP6V1C2/ATP4B/TTPA/SLC26A3/SLC26A4/ATP6V1A/AVPR1A/ATP1A1/SCNN1A/SLC4A4/PDK4/CA2/NEDD4L/ATP12A/DMXL1/SLC12A1/SPX/TFAP2B/RAB39A/LRRK2/ATP5F1B/BCL2/SLC4A5/CLIC4/CLCN3/SLC12A6/MAPK1/SLC12A2/ATP6V1C1/KCNJ10/PDK2/ATP6V1D/CYP4A11/ATP1B1/ATP6AP2/EDNRB/AGTR2/DMXL2/KCNMA1/UBE3A/ATP6V1H/ATP6V1B2
GOBP_REGULATION_OF_PH	GOBP_REGULATION_OF_PH	102	0.602122	2.52187	1e-10	1.59425e-07	1.46868e-07	8599	tags=37%, list=15%, signal=32%	ATP6V0A4/ATP6V1G3/ATP6V0D2/SLC4A1/CFTR/RHCG/SLC4A9/SLC9A4/ATP6V1B1/SLC9A2/ATP6V1C2/ATP4B/TTPA/SLC26A3/SLC26A4/ATP6V1A/AVPR1A/SLC4A4/PDK4/CA2/DMXL1/RAB39A/LRRK2/ATP5F1B/BCL2/SLC4A5/CLIC4/CLCN3/MAPK1/ATP6V1C1/PDK2/ATP6V1D/ATP6AP2/EDNRB/DMXL2/UBE3A/ATP6V1H/ATP6V1B2
GOCC_IMMUNOGLOBULIN_COMPLEX	GOCC_IMMUNOGLOBULIN_COMPLEX	156	-0.644482	-1.9446	1e-10	1.59425e-07	1.46868e-07	16034	tags=79%, list=28%, signal=57%	IGKV4-1/IGKV1D-42/IGHV2-5/IGLV5-45/IGKV6-21/IGLV3-19/IGHV2-26/IGKV3D-15/IGLV2-8/IGKV1-5/IGHV4-61/TRBC1/IGLV1-36/IGLV5-37/IGKV2-30/IGHV3-49/IGLV2-11/JCHAIN/TRBC2/IGKV1D-8/IGKJ1/IGLV1-51/IGHV4-59/IGHV3-35/IGLV2-33/LIME1/IGLL1/IGHD1-1/IGLV8-61/IGHV3-72/IGKV1-6/IGHA1/IGHV7-4-1/IGLV4-3/IGLV11-55/IGLV1-50/IGHV3-38/IGHJ1/IGHV5-51/IGLV2-18/IGKV2D-26/IGHV3-53/IGHV4-4/IGHD/IGHG4/IGLV2-23/IGLV1-47/IGHV1-58/…
GOBP_ALPHA_AMINO_ACID_METABOLIC_PROCESS	GOBP_ALPHA_AMINO_ACID_METABOLIC_PROCESS	190	0.425105	1.95895	3.24321e-08	4.13639e-05	3.8106e-05	13750	tags=44%, list=24%, signal=33%	TAT/BAAT/OTC/ARG1/AGXT/TYR/PAH/GNMT/SLC25A21/IYD/CPS1/HAL/ACAT1/ACADSB/MMUT/ALDH5A1/SLC39A8/DLD/DHFRP1/ATP7A/GLYATL1/AGXT2/GOT1/GLUD2/DDAH1/ALDH8A1/AMDHD1/OGDH/BHMT/GCLC/AGMAT/DDO/GFPT1/SHMT1/DPEP1/SEPSECS/ALDH4A1/ASRGL1/DLST/SERINC5/AASDHPPT/MTHFD1/PPAT/DHFR/CTH/MTHFS/GLYAT/GCLM/DHFR2/MTRR/ADSS2/GLUD1/MTR/GOT2/GLS/ODC1/ACMSD/SEPHS2/DGLUCY/NAGS/OAT/AZIN1/MECP2/SLC25A12/PRODH/GLDC/CDO1/ATP2B4/ILVB…
GOBP_STEROL_METABOLIC_PROCESS	GOBP_STEROL_METABOLIC_PROCESS	165	0.450851	1.99823	6.15832e-08	6.48022e-05	5.96983e-05	10310	tags=35%, list=18%, signal=29%	APOA5/SULT2A1/NR0B2/CFTR/APOA2/CYP1A2/APOA1/APOF/PON1/CYP7A1/CEL/CYP3A4/AKR1D1/HMGCS2/CES1/CUBN/CYP51A1/PRKAA2/SC5D/FMO5/CYP11A1/ANGPTL3/OSBPL1A/CAT/LEPR/ERLIN2/CYP7B1/HMGCS1/LPCAT3/CYP39A1/ACAA2/MBTPS2/HMGCR/FAXDC2/LIPA/EPHX2/ACLY/PRKAG2/TTC39B/LIMA1/CLN8/PRKAA1/INSIG1/GPAM/IDI1/VLDLR/ABCA1/CYP4V2/DHCR7/MIR30C1/SREBF2/MIR185/ACADL/FDFT1/NFE2L1/LRP5/DGAT2/ACACB
GOBP_KERATINIZATION	GOBP_KERATINIZATION	224	-0.540923	-1.65955	7.31754e-08	6.48022e-05	5.96983e-05	14716	tags=54%, list=26%, signal=40%	KRT72/KRTAP19-1/KRTAP29-1/KRTAP4-2/PKP1/KRTAP13-3/KRTAP23-1/KRTAP4-11/KRT28/KRTAP13-2/KRT19/KRT25/KRTAP10-2/KRT39/KRTAP5-10/KRTAP12-4/LCE2B/LCE2D/KRTAP10-9/TGM3/KRTAP4-4/KRTAP4-6/LCE2C/KRT31/KRTAP10-7/PKP3/KRT82/KLK5/CELA2A/KRTAP5-5/KRTAP10-3/KRTAP9-1/KRT33A/KRTAP16-1/CASP14/KRTAP5-11/KRT35/KLK13/KLK14/KRTAP19-5/SPRR2G/KRTAP3-1/KRTAP27-1/KRT74/KRTAP24-1/KRT40/CNFN/KRTAP1-3/KRT77/KRTAP9-9/KRT6B/SP…
GOCC_MICROBODY	GOCC_MICROBODY	136	0.476402	2.0423	8.12949e-08	6.48022e-05	5.96983e-05	11908	tags=46%, list=21%, signal=36%	BAAT/AGXT/HAO1/ACAD11/HAO2/SLC27A2/ACSL1/URAD/NUDT12/EHHADH/VWA8/CAT/FABP1/TMEM35A/TMEM135/AKAP11/PHYH/PNPLA8/HSDL2/ACBD5/NUDT7/HMGCR/ALDH3A2/ABCD3/EPHX2/AGPS/PEX1/PEX3/PIK3C3/MARF1/FNDC5/DDO/HSD17B4/ATAD1/ISOC1/PEX7/MYO5A/IDI1/PEX19/PEX12/MTARC2/LONP2/ACSL3/MUL1/PEX11A/ACOX2/ACOX1/FAR2/PEX2/SCP2/CROT/RAB8B/SYT7/CRAT/IDE/ACSL4/MLYCD/ACOT2/LACC1/TRIM37/HACL1/ACOT4
GOBP_NUCLEOSOME_ASSEMBLY	GOBP_NUCLEOSOME_ASSEMBLY	145	0.438652	1.8943	2.91261e-07	0.000186529	0.000171838	2444	tags=14%, list=4%, signal=14%	TSPY2/H4C3/H4C6/H1-5/TSPY3/H2BW2/H4C2/H4C4/H2BC3/H4C13/H1-4/H3C3/H2BC10/H3C7/H1-1/H3C11/H4C1/H3C2/H1-3/TSPY10/H3C1
GOBP_SPLICEOSOMAL_TRI_SNRNP_COMPLEX_ASSEMBLY	GOBP_SPLICEOSOMAL_TRI_SNRNP_COMPLEX_ASSEMBLY	24	0.804496	2.49997	2.92503e-07	0.000186529	0.000171838	3783	tags=29%, list=7%, signal=27%	RNU5B-1/RNU5A-1/RNU4-2/RNU4-1/RNU6ATAC/RNU5D-1/RNU4ATAC
GOBP_THIOESTER_METABOLIC_PROCESS	GOBP_THIOESTER_METABOLIC_PROCESS	105	0.50583	2.13051	3.37817e-07	0.000195842	0.000180417	12834	tags=52%, list=23%, signal=41%	BAAT/ACOT12/HMGCS2/ACAT1/DLAT/PDK4/ACOT11/ACSL1/ELOVL7/DLD/FITM2/SUCLA2/HMGCS1/SCD5/SUCLG2/PDP1/PDHA2/HSD17B12/PDP2/OGDH/NUDT7/PDK2/ELOVL4/ACSM3/ACLY/PDK1/PDHX/HACD2/HSD17B4/GPAM/DLST/PDK3/ACSBG1/ACSL3/GLYAT/CBR4/ACOT1/FAR2/PDHA1/DGAT2/ACACB/HTD2/THEM5/ACSS1/PDHB/ACSL4/MLYCD/ACOT2/ACSM6/ACSM5/ACOT4/HSD17B8/PDPR/PPT1/ACACA
GOBP_STEROID_BIOSYNTHETIC_PROCESS	GOBP_STEROID_BIOSYNTHETIC_PROCESS	190	0.397413	1.83134	6.28827e-07	0.000312296	0.000287699	9281	tags=29%, list=16%, signal=25%	APOA5/CYP17A1/BAAT/CFTR/APOA1/CYP7A1/CGA/CYP3A4/PPARGC1A/AKR1D1/PRLR/AKR1C4/HSD17B6/HMGCS2/CES1/ABCB11/HSD11B2/CYP51A1/ATP1A1/PRKAA2/SC5D/SLC27A2/CYP1A1/CYP11A1/PBX1/OSBPL1A/ASAH1/CYP3A7/ERLIN2/CYP7B1/HMGCS1/LPCAT3/CYP39A1/HSD17B12/EGR1/ACAA2/MBTPS2/SDR42E1/OSBP/HMGCR/FAXDC2/MED1/ACLY/PRKAG2/REST/SIRT1/HSD17B4/ACBD3/PRKAA1/INSIG1/GPAM/IDI1/SRD5A2/DHCR7/MIR30C1/SREBF2
GOBP_SPLICEOSOMAL_SNRNP_ASSEMBLY	GOBP_SPLICEOSOMAL_SNRNP_ASSEMBLY	51	0.636469	2.34984	6.36639e-07	0.000312296	0.000287699	6471	tags=20%, list=11%, signal=17%	RNU5B-1/RNU5A-1/RNU4-2/RNU4-1/RNU6ATAC/RNU5D-1/RNU4ATAC/RNU6-7/PRMT5/SNRPD3
GOBP_RDNA_HETEROCHROMATIN_ASSEMBLY	GOBP_RDNA_HETEROCHROMATIN_ASSEMBLY	39	0.707429	2.41377	6.87014e-07	0.000312935	0.000288287	2444	tags=28%, list=4%, signal=27%	H4C3/H4C6/H4C2/H4C4/H4C13/H3C3/H3C7/H3C11/H4C1/H3C2/H3C1
GOMF_ANTIGEN_BINDING	GOMF_ANTIGEN_BINDING	156	-0.5589	-1.68637	8.92907e-07	0.000379605	0.000349706	16641	tags=51%, list=29%, signal=36%	IGLV7-43/TRDC/IGKV4-1/IGHV2-5/IGLV3-19/IGHV2-26/IGLV2-8/IGKV1-5/IGHV4-61/TRBC1/IGKV2-30/LAG3/IGHV3-49/IGLV2-11/JCHAIN/TRBC2/KLRC2/IGLV1-51/IGHV4-59/IGHV3-35/IGLL1/IGHV3-72/IGHA1/MFAP4/IGHV7-4-1/IGHV3-38/IGHV5-51/IGHV3-53/IGHV4-4/IGHD/IGHG4/IGLV2-23/IGLV1-47/IGHV1-58/IGHV3-13/IGHV1OR15-1/IGHV1-69D/IGKV1D-33/IGKV1D-12/IGHA2/IGHV4-34/IGLV3-27/IGHV5-10-1/IGHV3-21/IGLV6-57/IGKV3-20/IGHV3-66/CLEC4M/IGH…
GOBP_PHOSPHATIDYLINOSITOL_BIOSYNTHETIC_PROCESS	GOBP_PHOSPHATIDYLINOSITOL_BIOSYNTHETIC_PROCESS	114	0.471497	2.00268	1.07985e-06	0.00043039	0.000396491	14294	tags=54%, list=25%, signal=40%	CWH43/PIK3C2G/INPP5J/PLCG2/CDS1/PIK3C2A/PTPN13/PIK3CA/MTMR12/MTM1/PGAP4/SACM1L/PIP5K1B/PIK3CB/PLEKHA2/PGAP1/PIGO/MTMR6/PIK3C3/PIKFYVE/RAB14/PIK3R4/PIGH/PI4KA/SYNJ1/PI4K2B/ATM/MTMR9/FGF2/PIGN/PIGS/PIP4K2C/SH3YL1/MPPE1/MTMR2/PIK3R1/PIGK/PIGB/INPP4B/RAB4A/PIGA/MTMR8/PIGF/PIGV/OCRL/PLEKHA1/PTEN/PLEKHA8/INPP5F/IMPA1/PIK3R3/MTMR1/INPP4A/PIGW/DGKE/RAB5A/FIG4/PLEKHA3/PIGP/BMX/PIP4K2A
GOBP_PH_REDUCTION	GOBP_PH_REDUCTION	58	0.595349	2.25592	1.2145e-06	0.000444427	0.000409423	8599	tags=38%, list=15%, signal=32%	ATP6V0A4/ATP6V1G3/ATP6V0D2/ATP6V1B1/ATP6V1C2/ATP4B/TTPA/ATP6V1A/AVPR1A/CA2/DMXL1/RAB39A/BCL2/CLIC4/CLCN3/ATP6V1C1/ATP6V1D/ATP6AP2/DMXL2/UBE3A/ATP6V1H/ATP6V1B2
GOBP_DNA_REPLICATION_DEPENDENT_NUCLEOSOME_ORGANIZATION	GOBP_DNA_REPLICATION_DEPENDENT_NUCLEOSOME_ORGANIZATION	32	0.733488	2.43277	1.27806e-06	0.000444427	0.000409423	2444	tags=34%, list=4%, signal=33%	H4C3/H4C6/H4C2/H4C4/H4C13/H3C3/H3C7/H3C11/H4C1/H3C2/H3C1
GOMF_OLFACTORY_RECEPTOR_ACTIVITY	GOMF_OLFACTORY_RECEPTOR_ACTIVITY	421	-0.468351	-1.45963	1.36046e-06	0.000444427	0.000409423	13852	tags=41%, list=24%, signal=31%	OR6X1/OR11H4/OR9G1/OR11H7/OR13D1/OR52L1/OR2A25/OR4F29/OR2J3/OR11A1/OR52K1/OR8D4/OR5H2/OR13J1/OR2K2/OR1P1/OR2T27/OR4K15/OR1J4/OR11H2/OR4D1/OR52E8/OR56A1/OR52A4P/OR1D5/OR8J3/OR4K14/OR52B2/OR5AR1/OR4X2/OR4M1/OR10H2/OR13F1/OR4K1/OR5I1/OR51V1/OR2B6/OR5AU1/OR52E4/OR1D4/OR6C3/GPR148/OR4K3/OR14C36/OR2M7/OR6C65/OR4C13/OR7E24/OR13A1/OR13C6P/OR2M4/OR10J3/OR56A5/OR10A3/OR11L1/OR4N2/OR2V2/OR6C4/OR2C3/OR1E1/OR…
GOCC_VACUOLAR_PROTON_TRANSPORTING_V_TYPE_ATPASE_COMPLEX	GOCC_VACUOLAR_PROTON_TRANSPORTING_V_TYPE_ATPASE_COMPLEX	18	0.823184	2.33273	1.45236e-06	0.000444427	0.000409423	1227	tags=28%, list=2%, signal=27%	ATP6V0A4/ATP6V1G3/ATP6V0D2/ATP6V1B1/ATP6V1C2
GOCC_SPLICEOSOMAL_TRI_SNRNP_COMPLEX	GOCC_SPLICEOSOMAL_TRI_SNRNP_COMPLEX	42	0.666525	2.31726	1.48041e-06	0.000444427	0.000409423	403	tags=10%, list=1%, signal=9%	RNU5B-1/RNU5A-1/RNU4-2/RNU4-1
GOBP_STEROL_HOMEOSTASIS	GOBP_STEROL_HOMEOSTASIS	92	0.509329	2.0943	1.56521e-06	0.000444427	0.000409423	10238	tags=36%, list=18%, signal=29%	MIR208A/APOA5/APOC3/APOA2/APOA1/CYP7A1/CES1/ABCB11/G6PC/ANGPTL3/ABCG8/AKR1C1/CYP7B1/CYP39A1/RORA/MIR128-1/LIPC/EPHX2/ACSM3/TTC39B/LIMA1/SIRT1/INSIG1/NUS1/ABCA1/MIR30C1/SREBF2/MIR590/MIR148A/MIR185/TMEM97/LRP5/DGAT2
GOBP_PEROXISOMAL_TRANSPORT	GOBP_PEROXISOMAL_TRANSPORT	72	0.537681	2.09035	1.60292e-06	0.000444427	0.000409423	13614	tags=54%, list=24%, signal=41%	BAAT/AGXT/HAO1/HAO2/SLC27A2/EHHADH/CAT/PHYH/NUDT7/ABCD3/EPHX2/AGPS/PEX1/USP9X/PEX3/DDO/HSD17B4/PEX7/PEX19/PEX12/LONP2/ACOX2/ACOX1/UBE2D3/PEX2/SCP2/CROT/RAB8B/CRAT/IDE/MLYCD/ACOT2/HACL1/ACOT4/ZFAND6/UBB/PECR/DAO/PEX13
GOBP_FATTY_ACID_CATABOLIC_PROCESS	GOBP_FATTY_ACID_CATABOLIC_PROCESS	106	0.475342	2.01066	1.75352e-06	0.000465924	0.000429227	10770	tags=45%, list=19%, signal=37%	CEL/HAO1/ABCB11/ABHD2/ACAD11/ACAT1/ACADM/ADTRP/HAO2/SLC27A2/PCCA/PCK1/EHHADH/MMUT/FABP1/AUH/PHYH/PPARA/PCCB/ETFDH/ACAA2/CPT2/ACBD5/HADHB/NUDT7/ALDH3A2/ABCD3/CPT1A/IRS1/HADH/HSD17B4/MMAA/PEX7/ABHD3/LONP2/LPIN2/ACOX2/ECHDC1/HADHA/ACOX1/ACADL/ETFA/PEX2/IVD/SCP2/ACACB/CROT/CRAT
GOMF_STEROID_BINDING	GOMF_STEROID_BINDING	100	0.481961	2.0256	1.89169e-06	0.000482531	0.000444526	13330	tags=52%, list=23%, signal=40%	APOA5/APOC3/APOA2/APOA1/APOF/GC/CYP3A4/AKR1D1/ESRRG/CALB1/KL/NR3C2/HSD11B2/ATP1A1/PAQR5/PROM1/ESRRB/OSBPL1A/PGR/AR/GRAMD1C/OSBPL8/ERLIN2/RORA/OSBP/RORC/PTCH1/INSIG1/UGT1A1/ABCA1/VDR/OSBPL11/PGRMC1/SCARB2/SCP2/NR3C1/VDAC2/HSD11B1/PGRMC2/STARD3NL/ESRRA/OSBPL10/ABCG1/SERPINA6/SOAT1/NPC1/PDIA2/ERLIN1/VDAC1/OSBP2/STARD4/OSBPL9
GOBP_CELLULAR_AMINO_ACID_CATABOLIC_PROCESS	GOBP_CELLULAR_AMINO_ACID_CATABOLIC_PROCESS	105	0.480848	2.02529	2.22774e-06	0.000529013	0.000487347	12337	tags=42%, list=22%, signal=33%	TAT/OTC/ARG1/AGXT/PAH/SLC25A21/HAL/ALDH6A1/ABAT/ALDH5A1/DLD/AUH/AGXT2/GOT1/GLUD2/DDAH1/ALDH8A1/HIBCH/AMDHD1/OGDH/HIBADH/MCCC1/DDO/SHMT1/ALDH4A1/ASRGL1/DLST/MCCC2/ACAD8/PPAT/CARNMT1/HNMT/MTRR/IVD/GLUD1/GOT2/GLS/ACMSD/OAT/PRODH/GLDC/CDO1/HMGCLL1/ATP2B4
GOBP_PEROXISOME_ORGANIZATION	GOBP_PEROXISOME_ORGANIZATION	84	0.502305	2.03637	2.25152e-06	0.000529013	0.000487347	12006	tags=44%, list=21%, signal=35%	BAAT/AGXT/HAO1/HAO2/SLC27A2/EHHADH/CAT/TMEM135/PHYH/NUDT7/ABCD3/EPHX2/AGPS/PEX1/USP9X/PEX3/DDO/HSD17B4/PEX7/PEX19/PEX12/LONP2/PEX11A/ACOX2/ACOX1/UBE2D3/PEX2/SCP2/CROT/RAB8B/CRAT/IDE/MLYCD/ACOT2/HACL1/ACOT4/ZFAND6
GOBP_NUCLEOSIDE_BISPHOSPHATE_METABOLIC_PROCESS	GOBP_NUCLEOSIDE_BISPHOSPHATE_METABOLIC_PROCESS	140	0.438376	1.87283	2.32278e-06	0.000529013	0.000487347	11908	tags=44%, list=21%, signal=35%	SULT2A1/BAAT/SULT1C3/ACOT12/HMGCS2/PANK1/ACAT1/DLAT/PDK4/ACOT11/ACSL1/ELOVL7/DLD/FITM2/SUCLA2/HMGCS1/SCD5/PANK3/SUCLG2/SULT1C4/PDP1/PDHA2/HSD17B12/PDP2/OGDH/NUDT7/HMGCR/PDK2/ELOVL4/ACSM3/ACLY/PDK1/PDHX/HACD2/HSD17B4/SULT1B1/GPAM/DLST/PDK3/MCCC2/ACSBG1/ACSL3/GLYAT/CBR4/ACOT1/BPNT1/FAR2/PDHA1/DGAT2/ACACB/ENPP1/HTD2/CROT/THEM5/ACSS1/PDHB/ACSL4/MLYCD/ACOT2/ACSM6/ACSM5/ACOT4
GOBP_CELLULAR_RESPONSE_TO_STARVATION	GOBP_CELLULAR_RESPONSE_TO_STARVATION	157	0.42148	1.82127	2.71186e-06	0.000596328	0.00054936	14874	tags=48%, list=26%, signal=35%	ALB/NUPR2/KRT20/DAPL1/GCGR/SLC38A3/PRKAA2/RRAGD/PDK4/RNF152/PCK1/CPEB4/LRRK2/GABARAPL1/BCL2/DSC2/SFRP1/HSPA8/PPARA/SIK2/MAPK1/SESN3/XPR1/FNIP1/STK24/PRKAG2/IMPACT/PIK3C3/VPS41/BMPR2/PRKD1/KLF10/SIRT1/PIK3R4/FOXO3/PRKAA1/FOXO1/LAMP2/SREBF2/BECN1/EIF2AK2/LARS1/ZFYVE1/WRN/USP33/MIOS/MAP3K5/EIF2S1/RALB/SEH1L/MAPK8/WNT2B/EIF2AK3/MTOR/C12orf66/EIF2AK4/GCN1/NFE2L2/BMT2/FOXA3/AMBRA1/SESN1/SH3GLB1/ATG5/PR…
GOCC_MICROBODY_LUMEN	GOCC_MICROBODY_LUMEN	51	0.615034	2.2707	3.08219e-06	0.000655171	0.000603568	11908	tags=55%, list=21%, signal=43%	BAAT/AGXT/HAO1/HAO2/NUDT12/EHHADH/CAT/FABP1/PHYH/NUDT7/ABCD3/EPHX2/AGPS/DDO/HSD17B4/PEX7/LONP2/ACOX2/ACOX1/FAR2/SCP2/CROT/CRAT/IDE/MLYCD/ACOT2/HACL1/ACOT4
GOBP_KERATINOCYTE_DIFFERENTIATION	GOBP_KERATINOCYTE_DIFFERENTIATION	301	-0.488413	-1.5099	3.90969e-06	0.00080426	0.000740915	14716	tags=43%, list=26%, signal=32%	KRT72/CTSV/KRTAP19-1/KRTAP29-1/KRTAP4-2/PKP1/KRTAP13-3/KRTAP23-1/KRTAP4-11/KRT28/KRTAP13-2/KRT19/KRT25/KRTAP10-2/KRT39/KRTAP5-10/KRTAP12-4/LCE2B/POU3F1/LCE2D/KRTAP10-9/TGM3/KRTAP4-4/FOXN1/DNASE1L2/KRTAP4-6/LCE2C/KRT31/KRTAP10-7/PKP3/KRT82/KLK5/CELA2A/KRTAP5-5/KRTAP10-3/KRTAP9-1/ACER1/KRT33A/KRTAP16-1/CASP14/WNT16/KRTAP5-11/KRT35/KLK13/KLK14/KRTAP19-5/SPRR2G/KRTAP3-1/KRTAP27-1/KRT74/KRTAP24-1/KRT4…
GOBP_IMMUNOGLOBULIN_PRODUCTION	GOBP_IMMUNOGLOBULIN_PRODUCTION	196	-0.51807	-1.58062	4.4295e-06	0.000882715	0.000813191	16770	tags=44%, list=29%, signal=31%	KMT5C/FOXP3/IGLV7-43/TRAV40/IGKV4-1/IGKV1D-42/IGLV5-45/IGKV6-21/IGLV3-19/XCL1/IGKV3D-15/IGLV2-8/IGKV1-5/IGLV1-36/IL21/IL13/IGLV5-37/IGKV2-30/TNFRSF4/IGLV2-11/IGKV1D-8/TMIGD2/TRAV38-2DV8/IGLV1-51/BATF/VPREB3/IGLV2-33/IL4/IGLV8-61/IGKV1-6/IGLV4-3/IGLV11-55/IGLV1-50/IGLV2-18/IGKV2D-26/IGLV2-23/IGLV1-47/AICDA/IGLV3-10/IGKV1D-33/IGKV1D-12/IGKV2D-24/IGLV10-54/IGLV3-27/C17orf99/IGLV6-57/IGKV3-20/IGLV2-1…
GOBP_PYRUVATE_METABOLIC_PROCESS	GOBP_PYRUVATE_METABOLIC_PROCESS	148	0.424037	1.88427	4.66201e-06	0.000900898	0.000829941	14389	tags=51%, list=25%, signal=38%	SLC4A1/AGXT/PPARGC1A/OGDHL/PFKFB2/ZBTB20/DLAT/PRKAA2/SLC4A4/PDK4/PCK1/ESRRB/PFKM/ENTPD5/DLD/PPARA/PDP1/PDHA2/PDP2/FBP1/PKLR/OGDH/RANBP2/PDK2/NUP160/NUP133/PRKAG2/NUP153/POM121/PDK1/PDHX/NUP205/PRKAA1/PGK1/EP300/BPGM/PDK3/NUP155/PGAM1/NDC1/DHTKD1/NCOR1/NUP58/TPR/ME1/P2RX7/PDHA1/ALDOB/NUP98/PSEN1/GLO1/APP/NR4A3/SEH1L/PDHB/ARNT/PGM1/ME2/PCK2/PDPR/NUP54/VDAC1/ENO4/PFKP/FOXK1/PGM2L1/IGF1/NUP88/PRKAG1/…
GOBP_MONOCARBOXYLIC_ACID_CATABOLIC_PROCESS	GOBP_MONOCARBOXYLIC_ACID_CATABOLIC_PROCESS	131	0.437938	1.83208	6.29306e-06	0.00118032	0.00108735	10770	tags=44%, list=19%, signal=35%	SULT2A1/AGXT/CEL/HAO1/AKR1D1/ABCB11/ABHD2/ACAD11/ACAT1/LDHD/ACADM/ADTRP/HAO2/SLC27A2/PCCA/PCK1/EHHADH/MMUT/XYLB/FABP1/AUH/AGXT2/PHYH/SORD/PPARA/PCCB/ETFDH/ACAA2/CPT2/ACBD5/HADHB/NUDT7/ALDH3A2/ABCD3/CPT1A/CYP4A11/IRS1/CRYL1/HADH/HSD17B4/MMAA/PEX7/ABHD3/LONP2/LPIN2/ACOX2/ECHDC1/HADHA/ACOX1/ACADL/ETFA/PEX2/IVD/SCP2/ACACB/CROT/CRAT
GOMF_INORGANIC_ANION_TRANSMEMBRANE_TRANSPORTER_ACTIVITY	GOMF_INORGANIC_ANION_TRANSMEMBRANE_TRANSPORTER_ACTIVITY	145	0.403811	1.74384	6.73972e-06	0.00122798	0.00113126	7126	tags=27%, list=13%, signal=24%	AQP6/BSND/SLC26A7/CLCNKB/SLC4A1/SLC12A3/CFTR/SLC4A9/SLC18A2/GABRA2/SLC6A2/ANO5/CLCNKA/SLC26A3/SLC22A8/SLC26A4/GABRB2/ANO4/SLC4A4/GABRB3/SLC13A1/SLC6A4/CLIC5/CLCN5/SLC25A30/SLC12A1/SLC39A8/GABRG1/PCYOX1/SLC4A5/SLC1A1/CLIC4/CLCN3/SLC12A6/SLC17A3/SLC12A2/XPR1/GLRB/CLCN4
GOMF_OXIDOREDUCTASE_ACTIVITY_ACTING_ON_CH_OH_GROUP_OF_DONORS	GOMF_OXIDOREDUCTASE_ACTIVITY_ACTING_ON_CH_OH_GROUP_OF_DONORS	130	0.437774	1.81425	8.1276e-06	0.00143971	0.00132632	14420	tags=52%, list=25%, signal=39%	ADH1A/ADH4/ADH1C/DHRS2/HAO1/AKR1D1/AKR1C4/HSD17B6/HSD11B2/ABCC4/HPGD/LDHD/IDH3A/HAO2/L2HGDH/EHHADH/ADH6/RDH16/BDH1/AKR1C1/CHDH/SORD/HSD17B12/GPD2/SDR42E1/HADHB/HMGCR/ALDH3A2/HIBADH/DHRS9/LDHAL6A/UEVLD/CRYL1/HADH/HSD17B4/KDSR/ADH5/SRD5A2/ME1/CBR4/PTGR1/RDH10/HADHA/VKORC1L1/MDH1/HSD11B1/ADH1B/AKR1C2/AKR7A3/ZADH2/ME2/RDH12/HSD17B8/HSD17B11/MDH2/GRHPR/AKR7A2/RDH11/DHDH/PTGR2/BDH2/IDH2/CYP4A22/BMP2/PH…
GOCC_PIGMENT_GRANULE	GOCC_PIGMENT_GRANULE	106	0.452458	1.91386	9.20371e-06	0.00155534	0.00143284	15106	tags=44%, list=27%, signal=33%	MLANA/PMEL/TYR/MYRIP/TYRP1/GPR143/ATP1A1/GPNMB/HSPA8/CANX/SYPL1/TMEM33/RAB29/CLTC/PDIA6/MYO5A/ATP6V1B2/GNA13/PDCD6IP/STX3/SLC45A2/SYNGR1/OCA2/ITGB1/RAB38/TMED10/HSP90AA1/CCT4/TFRC/TPP1/MYO7A/SEC22B/HSP90AB1/ANKRD27/GANAB/GGH/RAB27B/YWHAB/RAB27A/RAB5A/SDCBP/STOM/ATP6V0A1/RAB9A/MREG/LAMP1/YWHAE
GOBP_REGULATION_OF_MACROAUTOPHAGY	GOBP_REGULATION_OF_MACROAUTOPHAGY	160	0.402315	1.77718	9.26815e-06	0.00155534	0.00143284	14294	tags=50%, list=25%, signal=38%	ATP6V0D2/ATP6V1B1/ATP6V1C2/ATP6V1A/PRKAA2/RRAGD/SMCR8/VPS13D/LRRK2/PIK3CA/MTM1/RAB3GAP2/EXOC8/ATP6V1C1/VPS13C/SESN3/ATP6V1D/FYCO1/SCOC/PINK1/EPM2A/PRKAG2/SPTLC2/PRKAB2/VPS35/KDR/ADRB2/SIRT1/UBQLN1/PRKAA1/VPS26A/ATP6V1H/ATP6V1B2/SNX6/WAC/NEDD4/SPTLC1/RUBCN/BECN1/HTT/LAMTOR3/PIP4K2C/BNIP3L/UBQLN2/EXOC4/EXOC7/RB1CC1/RALB/RAB3GAP1/MTMR8/MAPK8/USP30/MTOR/SMG1/LARP1/RNF41/PRKAB1/NPC1/SEC22B/GNAI3/ATP6V…
GOBP_PHAGOSOME_ACIDIFICATION	GOBP_PHAGOSOME_ACIDIFICATION	28	0.715646	2.30878	1.09547e-05	0.00179123	0.00165015	2815	tags=21%, list=5%, signal=20%	ATP6V0A4/ATP6V1G3/ATP6V0D2/ATP6V1B1/ATP6V1C2/ATP6V1A
GOMF_BETA_CATENIN_BINDING	GOMF_BETA_CATENIN_BINDING	85	0.482856	1.95197	1.13419e-05	0.00180818	0.00166576	14088	tags=51%, list=25%, signal=38%	CTNNA2/AMER3/AMER2/AJAP1/AR/CDH1/SALL1/PRKN/APC/CD2AP/RORA/PTPRK/PTPRJ/MED12L/TBL1X/CTNNA3/DACT2/FOXO3/FOXO1/EP300/CTNND2/CDH2/GSK3B/SHROOM2/CTNNB1/ASH2L/AMER1/PSEN1/BCL9/CXADR/BTRC/CHD8/NUMB/APC2/LZIC/CTNNA1/KLF4/BCL9L/FOXO4/SKP1/SOX9/TCF4/GRIP1
GOMF_SYMPORTER_ACTIVITY	GOMF_SYMPORTER_ACTIVITY	143	0.419176	1.80632	1.28462e-05	0.00198347	0.00182725	7356	tags=30%, list=13%, signal=26%	SLC12A3/SLC4A9/SLC24A2/SLC13A2/SLC6A15/SLC18A2/SLC10A1/SLC38A3/SLC16A7/SLC6A2/SLC36A2/SLC10A2/SLC34A1/SLC4A4/SLC16A11/SLC16A12/SLC13A1/SLC38A4/SLC6A19/SLC6A4/SLC5A8/SLC5A1/SLC16A9/SLC12A1/SLC39A8/SLC5A12/SLC2A13/SLC46A2/SLC6A18/SLC4A5/SLC16A4/SLC1A1/SLC17A2/SLC2A9/SLC12A6/SLC10A5/SLC17A3/SLC12A2/SLC38A1/SLC24A1/SLC17A5/SLC5A2/SLC15A2
GOBP_TRICARBOXYLIC_ACID_CYCLE	GOBP_TRICARBOXYLIC_ACID_CYCLE	34	0.653202	2.21915	1.30635e-05	0.00198347	0.00182725	14212	tags=79%, list=25%, signal=60%	OGDHL/NNT/DLAT/IDH3A/ACO2/DLD/IREB2/SUCLA2/SUCLG2/PDHA2/SDHC/OGDH/SDHD/ACO1/SUCLG1/DLST/CS/DHTKD1/PDHA1/FH/MDH1/PDHB/ME2/SDHB/MDH2/IDH2/FAHD1
GOMF_ATPASE_COUPLED_ION_TRANSMEMBRANE_TRANSPORTER_ACTIVITY	GOMF_ATPASE_COUPLED_ION_TRANSMEMBRANE_TRANSPORTER_ACTIVITY	46	0.606214	2.1479	1.3719e-05	0.00202269	0.00186338	8599	tags=41%, list=15%, signal=35%	ATP6V0A4/ATP6V1G3/ATP6V0D2/ATP6V1C2/ATP4B/ABCB11/ATP6V1A/ABCC4/ATP2B2/ATP12A/ATP8A1/KCNJ11/PCYOX1/ATP5F1B/ATP6V1C1/ATP6V1D/ATP2C1/ATP6V1H/ATP6V1B2
GOBP_LIPID_OXIDATION	GOBP_LIPID_OXIDATION	110	0.451484	1.87633	1.39561e-05	0.00202269	0.00186338	14682	tags=59%, list=26%, signal=44%	ADH4/HAO1/PPARGC1A/ABCB11/ACAD11/ACAT1/PDK4/ACADM/HAO2/SLC27A2/EHHADH/FABP1/AUH/PHYH/PPARA/ETFDH/ACAA2/CPT2/HADHB/ALDH3A2/ABCD3/CPT1A/PRKAG2/IRS1/HADH/HSD17B4/PRKAA1/ADH5/PEX7/APPL2/LONP2/CYP4V2/ACOX2/ECHDC1/HADHA/ACOX1/ACADL/ETFA/MAPK14/PEX2/PLA2G7/IVD/DGAT2/SCP2/ACACB/CROT/CRAT/NR4A3/MTOR/MLYCD/FABP3/HACL1/PPARG/ILVBL/PECR/ADIPOR2/ALOX15/PLIN5/PEX13/BDH2/SOX9/ADIPOR1/ACAD10/DECR1/ACADS
GOBP_NEGATIVE_REGULATION_OF_GENE_EXPRESSION_EPIGENETIC	GOBP_NEGATIVE_REGULATION_OF_GENE_EXPRESSION_EPIGENETIC	124	0.424615	1.75472	1.50482e-05	0.00213249	0.00196454	2504	tags=15%, list=4%, signal=14%	H4C3/H4C6/H1-5/H4C2/H4C4/H4C13/H2AC21/H1-4/H3C3/H3C7/H1-1/H2AC4/H3C11/H4C1/H3C2/H1-3/H3C1/H2AC12
GOBP_ACETYL_COA_BIOSYNTHETIC_PROCESS	GOBP_ACETYL_COA_BIOSYNTHETIC_PROCESS	22	0.739879	2.26122	1.71283e-05	0.0023167	0.00213423	12712	tags=77%, list=22%, signal=60%	ACAT1/DLAT/PDK4/DLD/PDP1/PDHA2/PDP2/PDK2/ACLY/PDK1/PDHX/PDK3/PDHA1/ACSS1/PDHB/MLYCD/PDPR
GOMF_OXIDOREDUCTASE_ACTIVITY_ACTING_ON_THE_ALDEHYDE_OR_OXO_GROUP_OF_DONORS	GOMF_OXIDOREDUCTASE_ACTIVITY_ACTING_ON_THE_ALDEHYDE_OR_OXO_GROUP_OF_DONORS	44	0.614464	2.17587	1.76448e-05	0.0023167	0.00213423	10091	tags=57%, list=18%, signal=47%	ADH4/OGDHL/AKR1C4/ALDH6A1/DLAT/ALDH1L1/FMO5/ALDH1A2/AOX1/ALDH1B1/ALDH5A1/DLD/BCKDHB/PDHA2/ALDH8A1/HSD17B12/OGDH/ALDH3A2/PDHX/ALDH9A1/ALDH4A1/ADH5/DHTKD1/FAR2/PDHA1
GOBP_SENSORY_PERCEPTION_OF_SMELL	GOBP_SENSORY_PERCEPTION_OF_SMELL	445	-0.453543	-1.41406	1.77325e-05	0.0023167	0.00213423	13852	tags=39%, list=24%, signal=30%	OR6X1/OR11H4/OR9G1/OR11H7/OR13D1/OR52L1/OR2A25/OR4F29/OR2J3/OR11A1/OR52K1/OR8D4/OR5H2/OR13J1/OR2K2/OR1P1/OR2T27/OR4K15/OR1J4/OR11H2/OR4D1/OR52E8/OR56A1/OR52A4P/OR1D5/OR8J3/OR4K14/OR52B2/OR5AR1/OR4X2/OR4M1/OR10H2/OR13F1/OR4K1/OR5I1/OR51V1/OR2B6/OR5AU1/OR52E4/OR1D4/OR6C3/GPR148/OR4K3/OR14C36/OR2M7/OR6C65/OR4C13/OR7E24/OR13A1/OR13C6P/OR2M4/OR10J3/OR56A5/OR10A3/OR11L1/OR4N2/OR2V2/OR6C4/OR2C3/OR1E1/OR…
GOBP_ACETYL_COA_METABOLIC_PROCESS	GOBP_ACETYL_COA_METABOLIC_PROCESS	38	0.647016	2.18046	1.79086e-05	0.0023167	0.00213423	12834	tags=63%, list=23%, signal=49%	ACOT12/HMGCS2/ACAT1/DLAT/PDK4/DLD/HMGCS1/PDP1/PDHA2/PDP2/NUDT7/PDK2/ACLY/PDK1/PDHX/DLST/PDK3/PDHA1/ACACB/ACSS1/PDHB/MLYCD/PDPR/ACACA
GOCC_U5_SNRNP	GOCC_U5_SNRNP	22	0.739301	2.25946	1.81645e-05	0.0023167	0.00213423	2667	tags=14%, list=5%, signal=13%	RNU5B-1/RNU5A-1/RNU5D-1
GOCC_IMMUNOGLOBULIN_COMPLEX_CIRCULATING	GOCC_IMMUNOGLOBULIN_COMPLEX_CIRCULATING	69	-0.619443	-1.75256	2.17244e-05	0.00264076	0.00243277	14557	tags=71%, list=26%, signal=53%	IGHV4-61/TRBC1/IGHV3-49/JCHAIN/TRBC2/IGHV4-59/IGHV3-35/IGLL1/IGHV3-72/IGHA1/IGHV7-4-1/IGHV3-38/IGHV5-51/IGHV3-53/IGHV4-4/IGHD/IGHG4/IGHV1-58/IGHV3-13/IGHV1OR15-1/IGHV1-69D/IGHA2/IGHV4-34/IGHV5-10-1/IGHV3-21/IGKV3-20/IGHV3-66/IGHM/IGHV3-64D/IGHV2-70/IGLC6/IGHV4-39/IGLC2/IGHV1-18/IGHG3/IGHG1/IGHV3-33/IGHG2/IGKC/IGLC7/IGHV1-69/IGHV6-1/IGLL5/IGHV3-64/IGHV1-69-2/IGHV3-30/IGHV1-24/IGLC3/IGHV3-73
GOMF_IMMUNOGLOBULIN_RECEPTOR_BINDING	GOMF_IMMUNOGLOBULIN_RECEPTOR_BINDING	71	-0.620296	-1.76404	2.18619e-05	0.00264076	0.00243277	14557	tags=69%, list=26%, signal=51%	IGHV4-61/TRBC1/IGHV3-49/JCHAIN/TRBC2/IGHV4-59/IGHV3-35/IGLL1/IGHV3-72/IGHA1/IGHV7-4-1/IGHV3-38/IGHV5-51/IGHV3-53/IGHV4-4/IGHD/IGHG4/IGHV1-58/IGHV3-13/IGHV1OR15-1/IGHV1-69D/IGHA2/IGHV4-34/IGHV5-10-1/IGHV3-21/IGHV3-66/IGHM/IGHV3-64D/IGHV2-70/TARM1/IGLC6/IGHV4-39/IGLC2/IGHV1-18/IGHG3/IGHG1/IGHV3-33/IGHG2/IGKC/IGLC7/IGHV1-69/IGHV6-1/IGLL5/IGHV3-64/IGHV1-69-2/IGHV3-30/IGHV1-24/IGLC3/IGHV3-73
GOBP_POST_GOLGI_VESICLE_MEDIATED_TRANSPORT	GOBP_POST_GOLGI_VESICLE_MEDIATED_TRANSPORT	103	0.457963	1.92993	2.19476e-05	0.00264076	0.00243277	14901	tags=61%, list=26%, signal=45%	SORCS1/SORL1/ANK3/STXBP6/ARFGEF2/GOLGA7/STEAP2/SCAMP1/ANKFY1/GOLGA4/EXOC8/SPTBN1/VPS13C/KIF16B/PREPL/AP1AR/EXOC5/LYPLA1/EXOC6B/VPS13A/AP1G1/RAB14/RABEP1/GOLPH3L/VTI1B/KIF13A/MYO5A/MACF1/ACSL3/BLZF1/EXOC6/KLHL20/DOP1A/GGA2/VPS54/CNST/EXOC4/RBSN/SORT1/RAB10/VAMP3/RP2/SNAP23/VTI1A/CCDC93/EPS15/VPS35L/BBS2/EXOC2/MON2/VPS52/SCFD1/GOLPH3/ARL3/EXOC1/OPTN/NSF/SEC16A/WIPI1/AP3D1/C16orf70/VAMP2/LAMP1
GOCC_PROTON_TRANSPORTING_V_TYPE_ATPASE_COMPLEX	GOCC_PROTON_TRANSPORTING_V_TYPE_ATPASE_COMPLEX	27	0.722823	2.3235	2.38122e-05	0.00281205	0.00259057	2815	tags=22%, list=5%, signal=21%	ATP6V0A4/ATP6V1G3/ATP6V0D2/ATP6V1B1/ATP6V1C2/ATP6V1A
GOBP_CYTOSOLIC_TRANSPORT	GOBP_CYTOSOLIC_TRANSPORT	165	0.392926	1.7415	2.52501e-05	0.00288005	0.00265321	15559	tags=58%, list=27%, signal=42%	TBC1D14/CES1/SORL1/HOOK1/KIF1A/RDX/RAB6D/LRRK2/PRKN/KIF1B/RGP1/GCC2/SPAG9/ANKFY1/MAPK1/VPS13C/KIF16B/DNAJC13/SNX2/PREPL/AP1AR/LMTK2/RAB29/CLTC/VPS13A/PIK3C3/DCTN1/AP1G1/PIKFYVE/TBC1D5/RAB14/VPS35/TRAPPC10/ERC1/HEATR5B/VPS26A/VTI1B/GOSR1/SNX6/CHMP3/KIF5B/DAB2/KLHL20/BECN1/DOP1A/MAP2/ARL1/TBC1D23/ARFIP1/VPS54/RIC1/HEATR5A/MTMR2/ACTR2/SYT7/RAB21/RBSN/SORT1/VAMP3/RHOBTB3/EEA1/VTI1A/EPS15/EZR/TMEM87A/…
GOBP_NUCLEOSOME_ORGANIZATION	GOBP_NUCLEOSOME_ORGANIZATION	183	0.37699	1.75155	2.52913e-05	0.00288005	0.00265321	2444	tags=11%, list=4%, signal=11%	TSPY2/H4C3/H4C6/H1-5/TSPY3/H2BW2/H4C2/H4C4/H2BC3/H4C13/H1-4/H3C3/H2BC10/H3C7/H1-1/H3C11/H4C1/H3C2/H1-3/TSPY10/H3C1
GOBP_TRANSFERRIN_TRANSPORT	GOBP_TRANSFERRIN_TRANSPORT	36	0.638785	2.14517	2.6368e-05	0.00294903	0.00271676	2815	tags=17%, list=5%, signal=16%	ATP6V0A4/ATP6V1G3/ATP6V0D2/ATP6V1B1/ATP6V1C2/ATP6V1A
GOBP_INSULIN_RECEPTOR_SIGNALING_PATHWAY	GOBP_INSULIN_RECEPTOR_SIGNALING_PATHWAY	143	0.408367	1.75974	2.6822e-05	0.00294903	0.00271676	13473	tags=43%, list=24%, signal=33%	ATP6V0A4/ATP6V1G3/ATP6V0D2/AHSG/ATP6V1B1/ATP6V1C2/TRIM72/KL/ATP6V1A/SORL1/PDK4/ZNF106/GRB14/OSBPL8/PIK3C2A/EIF4EBP2/PIK3CA/APPL1/APC/IGF1R/SIK2/ATP6V1C1/SESN3/PDK2/ATP6V1D/FER/IRS1/OPA1/PTPN11/SIRT1/GAB1/PRKAA1/FOXO1/ATP6V1H/GPLD1/ATP6V1B2/SMARCC1/SOS1/GSK3B/PIP4K2C/STXBP4/ENPP1/PIK3R1/PRKCZ/NUCKS1/IDE/BCAR3/C2CD5/IGF2/PIK3R3/ATP6V0E2/GRB10/SLC39A14/PAK1/PRKCD/ATP6V1E1/CDK4/PTPRA/PHIP/SNX5/FOXO4
GOCC_BLOOD_MICROPARTICLE	GOCC_BLOOD_MICROPARTICLE	144	0.405003	1.74109	2.73233e-05	0.00295323	0.00272063	2227	tags=15%, list=4%, signal=14%	HRG/ALB/SERPINC1/C8A/ORM2/SLC4A1/APOA2/VTN/APOA1/ORM1/PON1/KNG1/AHSG/AMBP/ITIH2/ITIH1/GC/HPX/HBG2/CFHR1/AFM
GOBP_STEROL_BIOSYNTHETIC_PROCESS	GOBP_STEROL_BIOSYNTHETIC_PROCESS	78	0.495103	1.96085	2.92646e-05	0.00311034	0.00286536	10310	tags=36%, list=18%, signal=29%	APOA5/CFTR/APOA1/CYP7A1/HMGCS2/CES1/CYP51A1/PRKAA2/SC5D/ERLIN2/HMGCS1/LPCAT3/ACAA2/MBTPS2/HMGCR/FAXDC2/ACLY/PRKAG2/PRKAA1/INSIG1/GPAM/IDI1/DHCR7/MIR30C1/SREBF2/MIR185/FDFT1/ACACB
GOBP_BILE_ACID_METABOLIC_PROCESS	GOBP_BILE_ACID_METABOLIC_PROCESS	49	0.585458	2.11733	3.02414e-05	0.00316147	0.00291246	7982	tags=33%, list=14%, signal=28%	SULT2A1/BAAT/CYP7A1/KIT/AKR1D1/AKR1C4/CES1/ABCB11/SLC27A2/OSBPL1A/AKR1C1/CYP7B1/CYP39A1/OSBP/SIRT1/HSD17B4
GOBP_STEROL_IMPORT	GOBP_STEROL_IMPORT	10	0.886314	2.15975	3.10032e-05	0.00318882	0.00293767	439	tags=30%, list=1%, signal=30%	APOC3/APOA2/APOA1
GOBP_EPIDERMAL_CELL_DIFFERENTIATION	GOBP_EPIDERMAL_CELL_DIFFERENTIATION	359	-0.454748	-1.4139	3.39564e-05	0.00343714	0.00316643	14969	tags=38%, list=26%, signal=28%	PDZD7/KRTAP26-1/SFRP4/KRT72/CTSV/KRTAP19-1/KRTAP29-1/KRTAP4-2/PKP1/KRTAP13-3/KRTAP23-1/KRTAP4-11/KRT28/KRTAP13-2/KRT19/KRT25/KRTAP10-2/KRT39/KRTAP5-10/KRTAP12-4/LCE2B/POU3F1/LCE2D/KRTAP10-9/TGM3/KRTAP4-4/FOXN1/DNASE1L2/KRTAP4-6/LCE2C/KRT31/KRTAP10-7/PITX2/OVOL3/PKP3/KRT82/KLK5/CELA2A/KRTAP5-5/KRTAP10-3/KRTAP9-1/ACER1/KRT33A/KRTAP16-1/CASP14/WNT16/KRTAP5-11/STRC/KRT35/KLK13/KLK14/GRXCR1/KRTAP19-5/…
GOMF_NAD_BINDING	GOMF_NAD_BINDING	53	0.567508	2.10309	3.5316e-05	0.00347591	0.00320214	14345	tags=57%, list=25%, signal=42%	ADH4/NNT/HSD11B2/GPD1L/HPGD/IDH3A/AOX1/ALDH1B1/DLD/SORD/HIBADH/CRYL1/HADH/SIRT1/SIRT5/ME1/GLUD1/GLYR1/ALDH1A1/ME2/PARP1/HSD17B8/UXS1/GRHPR/QDPR/NDUFS2/BDH2/IDH2/PHGDH/CTBP2
GOBP_NUCLEOSIDE_BISPHOSPHATE_BIOSYNTHETIC_PROCESS	GOBP_NUCLEOSIDE_BISPHOSPHATE_BIOSYNTHETIC_PROCESS	67	0.517953	2.00062	3.54295e-05	0.00347591	0.00320214	15369	tags=61%, list=27%, signal=45%	PANK1/ACAT1/DLAT/PDK4/ACSL1/ELOVL7/DLD/SCD5/PANK3/PDP1/PDHA2/HSD17B12/PDP2/PDK2/ELOVL4/ACLY/PDK1/PDHX/HACD2/PDK3/ACSBG1/ACSL3/CBR4/PDHA1/ACACB/HTD2/ACSS1/PDHB/ACSL4/MLYCD/HSD17B8/PDPR/PPT1/ACACA/SLC26A1/SLC26A2/PAPSS1/SLC35B3/SLC35B2/PANK2/SCD
GOMF_ATPASE_ACTIVITY_COUPLED_TO_TRANSMEMBRANE_MOVEMENT_OF_IONS_ROTATIONAL_MECHANISM	GOMF_ATPASE_ACTIVITY_COUPLED_TO_TRANSMEMBRANE_MOVEMENT_OF_IONS_ROTATIONAL_MECHANISM	22	0.724572	2.21444	3.72038e-05	0.00359468	0.00331155	8599	tags=45%, list=15%, signal=39%	ATP6V0A4/ATP6V1G3/ATP6V0D2/ATP6V1C2/ATP6V1A/ATP5F1B/ATP6V1C1/ATP6V1D/ATP6V1H/ATP6V1B2
GOBP_STEROL_TRANSPORT	GOBP_STEROL_TRANSPORT	118	0.415573	1.71548	3.88097e-05	0.00369387	0.00340294	12113	tags=38%, list=21%, signal=30%	APOA5/APOC3/CFTR/APOA2/APOA1/PON1/CEL/SLC22A24/CES1/EGF/OSBPL1A/GRAMD1C/ABCG8/ABCA8/OSBPL8/AKR1C1/LPCAT3/LRP6/MIR26A1/MIR128-1/OSBP/LIPC/VPS4B/TTC39B/LIMA1/PTCH1/SIRT1/NUS1/ABCA1/STX12/OSBPL11/SREBF2/MIR148A/SCP2/MSR1/SYT7/ABCA12/NFKB1/RELCH/SERAC1/OSBPL10/CD36/ABCG1/SOAT1/NPC1
GOCC_CAJAL_BODY	GOCC_CAJAL_BODY	73	0.502458	1.96132	3.99461e-05	0.0037424	0.00344764	1868	tags=11%, list=3%, signal=11%	SCARNA5/SCARNA1/SCARNA11/SCARNA23/SCARNA3/SNORA38B/SCARNA21/SNORA38
GOCC_INTERMEDIATE_FILAMENT	GOCC_INTERMEDIATE_FILAMENT	214	-0.492326	-1.50759	4.08138e-05	0.0037424	0.00344764	14909	tags=46%, list=26%, signal=34%	KRTAP26-1/KRT72/KRTAP19-1/KRTAP29-1/KRTAP4-2/PKP1/KRTAP13-3/KRTAP23-1/KRTAP4-11/KRT28/KRTAP13-2/KRT19/KRT25/NME1/KRTAP10-2/KRT39/KRTAP5-10/KRTAP20-3/KRTAP12-4/KRTAP10-9/KRTAP4-4/KRTAP4-6/FBF1/KRT31/KRTAP10-7/SCYGR3/KRT82/PRPH/KRTAP5-5/KRTAP10-3/KRTAP4-12/KRTAP9-1/KRT33A/KRTAP16-1/CASP14/KRTAP5-11/KRTAP20-4/SCYGR8/KRT35/DES/KRTAP19-5/KRTAP3-1/KRTAP27-1/KRT74/KRTAP24-1/KRT40/SCYGR2/KRTAP1-3/KRT77/K…
GOCC_SM_LIKE_PROTEIN_FAMILY_COMPLEX	GOCC_SM_LIKE_PROTEIN_FAMILY_COMPLEX	106	0.433644	1.83428	4.10801e-05	0.0037424	0.00344764	1485	tags=8%, list=3%, signal=7%	RNU5B-1/RNU5A-1/RNU4-2/RNU4-1/RNU1-4/RNVU1-2A/RNVU1-7/RNU6ATAC
GOBP_REGULATION_OF_RESPONSE_TO_WOUNDING	GOBP_REGULATION_OF_RESPONSE_TO_WOUNDING	160	0.383521	1.69415	4.1701e-05	0.00374545	0.00345045	8969	tags=26%, list=16%, signal=22%	HRG/SERPINC1/APOH/VTN/KNG1/CPB2/MIR1298/MIR15B/F7/OCLN/CLDN19/REG3G/PROC/F11/ADTRP/ENPP4/EPHA4/VIL1/AJAP1/ST3GAL4/ATP7A/CERS2/F2RL1/ARFGEF1/PRKCE/SLC12A2/CLASP2/TNR/STK24/DUOX2/PHLDB2/PLPP3/KREMEN1/HPSE/FERMT1/CD9/ANO6/CADM4/CEACAM1/PLG/THBS1
GOBP_REGULATION_OF_WOUND_HEALING	GOBP_REGULATION_OF_WOUND_HEALING	129	0.41623	1.71568	4.34152e-05	0.00384526	0.0035424	8969	tags=27%, list=16%, signal=23%	HRG/SERPINC1/APOH/VTN/KNG1/CPB2/MIR1298/MIR15B/F7/OCLN/CLDN19/REG3G/PROC/F11/ADTRP/ENPP4/VIL1/AJAP1/ST3GAL4/F2RL1/ARFGEF1/PRKCE/SLC12A2/CLASP2/DUOX2/PHLDB2/PLPP3/HPSE/FERMT1/CD9/ANO6/CADM4/CEACAM1/PLG/THBS1
GOBP_DETECTION_OF_CHEMICAL_STIMULUS	GOBP_DETECTION_OF_CHEMICAL_STIMULUS	499	-0.432438	-1.35155	4.57427e-05	0.00399591	0.00368118	13852	tags=37%, list=24%, signal=28%	OR6X1/OR11H4/OR9G1/OR11H7/OR13D1/OR52L1/OR2A25/OR4F29/OR2J3/OR11A1/OR52K1/OR8D4/OR5H2/OR13J1/OR2K2/SSC5D/FOXA2/OR1P1/OR2T27/OR4K15/OR1J4/OR11H2/OR4D1/OR52E8/OR56A1/OR52A4P/OR1D5/OR8J3/OR4K14/TAS1R3/OR52B2/OR5AR1/TAS1R2/OR4X2/OR4M1/OR10H2/OR13F1/OR4K1/OR5I1/OR51V1/OR2B6/OR5AU1/OR52E4/ASIC3/OR1D4/OR6C3/GPR148/OR4K3/OR14C36/RTP5/OR2M7/OR6C65/SYT1/OR4C13/TAS1R1/GNAT1/DRGX/OR7E24/OR13A1/OR13C6P/OR2M4/…
GOBP_THIOESTER_BIOSYNTHETIC_PROCESS	GOBP_THIOESTER_BIOSYNTHETIC_PROCESS	53	0.561285	2.08002	4.74397e-05	0.00408815	0.00376616	12834	tags=60%, list=23%, signal=47%	ACAT1/DLAT/PDK4/ACSL1/ELOVL7/DLD/SCD5/PDP1/PDHA2/HSD17B12/PDP2/PDK2/ELOVL4/ACLY/PDK1/PDHX/HACD2/PDK3/ACSBG1/ACSL3/CBR4/PDHA1/ACACB/HTD2/ACSS1/PDHB/ACSL4/MLYCD/HSD17B8/PDPR/PPT1/ACACA
GOBP_PHAGOSOME_MATURATION	GOBP_PHAGOSOME_MATURATION	46	0.577262	2.04532	5.29697e-05	0.00450384	0.00414911	8599	tags=30%, list=15%, signal=26%	ATP6V0A4/ATP6V1G3/ATP6V0D2/ATP6V1B1/ATP6V1C2/ATP6V1A/RAB39A/SPG11/ATP6V1C1/ATP6V1D/PIKFYVE/RAB14/ATP6V1H/ATP6V1B2
GOCC_TIGHT_JUNCTION	GOCC_TIGHT_JUNCTION	123	0.408385	1.71209	5.51877e-05	0.00463068	0.00426596	13513	tags=50%, list=24%, signal=39%	CLDN8/EPB41L4B/LIN7A/MPP7/OCLN/CLDN19/WNK3/ANK3/AMOT/CLDN16/MARVELD2/MAGI3/PATJ/MPP5/CGNL1/FRMPD2/USP53/ASH1L/ILDR1/AMOTL1/APC/FZD5/CCND1/STRN/CGN/EPCAM/PARD3B/CRB3/RAPGEF2/CLDN10/TJP3/CLDN17/AFDN/MPDZ/CLDN12/PDCD6IP/PARD3/CCDC85C/PARD6B/LIN7C/SHROOM2/DLG1/MAGI1/PRKCI/PRKCZ/MTDH/CXADR/DDX58/CLDN20/FRMD4B/CLDN4/VAPA/AMOTL2/POF1B/TJP1/JAM3/CLDN2/TJP2/CLDN23/CDK4/CLDN7/TGFBR1
GOBP_CARDIAC_MUSCLE_CELL_ACTION_POTENTIAL	GOBP_CARDIAC_MUSCLE_CELL_ACTION_POTENTIAL	74	0.488659	1.90335	6.12494e-05	0.00503419	0.00463769	8788	tags=32%, list=15%, signal=27%	MIR208A/KCNE5/HCN2/SCN2B/DSG2/ATP1A1/GPD1L/ANK3/NEDD4L/DSP/KCNE1B/CACNA1D/ANK2/KCNJ3/AKAP9/DSC2/NOS1AP/ATP1B1/PKP2/CTNNA3/FGF12/NUP155/CAMK2D/SLMAP
GOMF_SOLUTE_CATION_SYMPORTER_ACTIVITY	GOMF_SOLUTE_CATION_SYMPORTER_ACTIVITY	99	0.435749	1.80829	6.22065e-05	0.00503419	0.00463769	7356	tags=31%, list=13%, signal=27%	SLC12A3/SLC4A9/SLC13A2/SLC6A15/SLC18A2/SLC10A1/SLC6A2/SLC36A2/SLC10A2/SLC34A1/SLC4A4/SLC13A1/SLC6A4/SLC5A8/SLC5A1/SLC12A1/SLC39A8/SLC5A12/SLC2A13/SLC4A5/SLC1A1/SLC17A2/SLC2A9/SLC12A6/SLC10A5/SLC17A3/SLC12A2/SLC38A1/SLC17A5/SLC5A2/SLC15A2
GOMF_OXIDOREDUCTASE_ACTIVITY_ACTING_ON_THE_ALDEHYDE_OR_OXO_GROUP_OF_DONORS_NAD_OR_NADP_AS_ACCEPTOR	GOMF_OXIDOREDUCTASE_ACTIVITY_ACTING_ON_THE_ALDEHYDE_OR_OXO_GROUP_OF_DONORS_NAD_OR_NADP_AS_ACCEPTOR	36	0.613702	2.06093	6.2365e-05	0.00503419	0.00463769	10091	tags=53%, list=18%, signal=43%	ADH4/AKR1C4/ALDH6A1/DLAT/ALDH1L1/ALDH1A2/ALDH1B1/ALDH5A1/DLD/PDHA2/ALDH8A1/HSD17B12/ALDH3A2/PDHX/ALDH9A1/ALDH4A1/ADH5/FAR2/PDHA1
GOBP_CELLULAR_HORMONE_METABOLIC_PROCESS	GOBP_CELLULAR_HORMONE_METABOLIC_PROCESS	135	0.397883	1.69018	6.3166e-05	0.00503512	0.00463855	5969	tags=19%, list=10%, signal=17%	ADH1A/ADH4/CYP17A1/UGT2B15/CYP1A2/ADH1C/UGT2B4/TTR/DHRS2/CYP3A4/PPARGC1A/AKR1D1/AKR1C4/HSD17B6/CYP1A1/CYP11A1/ALDH1A2/UGT1A9/ADH6/RDH16/AKR1C1/CYP3A7/ALDH8A1/HSD17B12/EGR1
GOCC_SMALL_NUCLEAR_RIBONUCLEOPROTEIN_COMPLEX	GOCC_SMALL_NUCLEAR_RIBONUCLEOPROTEIN_COMPLEX	94	0.45527	1.86244	6.64474e-05	0.00523129	0.00481927	3914	tags=12%, list=7%, signal=11%	RNU5B-1/RNU5A-1/RNU4-2/RNU4-1/RNU1-4/RNVU1-2A/RNVU1-7/RNU6ATAC/RNU5D-1/RNU4ATAC/RNVU1-17
GOCC_APICAL_JUNCTION_COMPLEX	GOCC_APICAL_JUNCTION_COMPLEX	136	0.396665	1.70048	7.2301e-05	0.00562273	0.00517987	13876	tags=51%, list=24%, signal=39%	CLDN8/EPB41L4B/LIN7A/MPP7/OCLN/CLDN19/WNK3/ANK3/AMOT/CLDN16/SHROOM3/MARVELD2/MAGI3/PATJ/NECTIN3/MPP5/CGNL1/FRMPD2/CDH1/USP53/ASH1L/AMOTL1/APC/FZD5/PLEKHA7/CCND1/STRN/CGN/EPCAM/PARD3B/CRB3/RAPGEF2/CLDN10/TJP3/CLDN17/PKN2/MPDZ/CLDN12/PDCD6IP/SHROOM4/PARD3/CCDC85C/PARD6B/LIN7C/SHROOM2/DLG1/MAGI1/PRKCI/PRKCZ/MTDH/CXADR/DDX58/CLDN20/FRMD4B/CLDN4/VAPA/AMOTL2/POF1B/TJP1/JAM3/CTNNA1/CLDN2/TJP2/CLDN23/CDK…
GOBP_TRANSITION_METAL_ION_TRANSPORT	GOBP_TRANSITION_METAL_ION_TRANSPORT	127	0.390543	1.59925	7.42002e-05	0.00565025	0.00520522	7674	tags=23%, list=13%, signal=20%	HRG/ATP6V0A4/ATP6V1G3/ATP6V0D2/ATP6V1B1/ATP6V1C2/HPX/ATP6V1A/SLC30A8/TRPC5/SLC30A9/NOX5/SLC40A1/SLC39A8/IREB2/MMGT1/ATP7A/SLC31A1/STEAP2/ATP7B/SLC30A1/ATP6V1C1/ATP6V1D/LMTK2/SLC39A9/CLTC/SLC30A6/ABCB7/ATP2C1
GOCC_DNA_PACKAGING_COMPLEX	GOCC_DNA_PACKAGING_COMPLEX	116	0.410128	1.70738	7.44269e-05	0.00565025	0.00520522	2504	tags=18%, list=4%, signal=17%	H4C3/H4C6/H1-5/H2BW2/H4C2/H4C4/H2BC3/H4C13/H2AC21/H1-4/H3C3/H2BC10/H3C7/H1-1/H2AC4/H3C11/H4C1/H3C2/H1-3/H3C1/H2AC12
GOMF_UDP_GLYCOSYLTRANSFERASE_ACTIVITY	GOMF_UDP_GLYCOSYLTRANSFERASE_ACTIVITY	144	0.389527	1.67457	7.70841e-05	0.00578312	0.00532763	13159	tags=36%, list=23%, signal=28%	UGT2B10/UGT2B15/UGT2B4/UGT2B28/GALNT17/B4GALNT2/UGT8/GALNT4/UGT2A3/GALNTL6/B3GNT10/GCNT4/UGT3A1/UGT1A9/UGT1A4/B4GALT6/B4GALNT1/B3GALNT1/B4GALNT3/GYS2/GCNT2/UGT1A6/MGAT4A/MGAT5/PIGH/UGT1A1/ABO/GCNT1/GALNT11/UGT2B7/GXYLT1/GALNT15/GALNT12/POGLUT3/HYAL1/CSGALNACT1/LARGE2/UGT2A1/PIGA/GCNT3/B4GALT5/B3GNT2/RXYLT1/GCNT7/MGAT2/UGT2B17/B3GLCT/B3GNT5/GYG1/EXTL2/HEXB/UGGT1
GOBP_EXCRETION	GOBP_EXCRETION	60	0.524709	2.02048	9.19202e-05	0.00681599	0.00627915	5169	tags=27%, list=9%, signal=24%	AQP6/ATP6V0A4/CLCNKB/ATP6V1B1/CLCNKA/SLC26A3/CHRNB4/NPHS2/AVPR1A/KCNJ1/NEDD4L/CLDN16/CLCN5/SPX/ABCG8/NFAT5
GOBP_POSITIVE_REGULATION_OF_WOUND_HEALING	GOBP_POSITIVE_REGULATION_OF_WOUND_HEALING	58	0.516433	1.95689	9.94577e-05	0.00725156	0.00668041	11778	tags=41%, list=21%, signal=33%	HRG/APOH/VTN/CPB2/F7/OCLN/REG3G/ENPP4/ST3GAL4/ARFGEF1/PRKCE/DUOX2/PLPP3/HPSE/FERMT1/ANO6/PLG/THBS1/ITGB1/PRDX2/DMTN/CLDN4/MTOR/CD36
GOBP_TOXIN_TRANSPORT	GOBP_TOXIN_TRANSPORT	39	0.602192	2.0547	0.000100069	0.00725156	0.00668041	17015	tags=77%, list=30%, signal=54%	ANTXRL/SLC22A2/SLC7A8/MTMR12/RAB40B/LRP6/SLC17A3/RAB29/ADAM10/LRP5/TCP1/CCT4/ABCG1/DNAJA1/TRIP4/SCFD1/MEP1B/ATP6V0A1/CCT2/CD274/COPB2/RAB43/RAB28/CCT5/SLC22A1/BNIP3/ANTXR2/HSPA5/CCT8/CCT6B
GOBP_HIPPO_SIGNALING	GOBP_HIPPO_SIGNALING	46	0.56291	1.99447	0.000111386	0.00798097	0.00735238	13450	tags=59%, list=24%, signal=45%	MOB1B/AMOT/WWC2/PJA2/FAT4/MOB3B/AMOTL1/SAV1/TEAD1/SHANK2/VGLL4/LATS1/CIT/STK3/MAPK14/WWTR1/WWC1/AMOTL2/AJUBA/TJP1/YAP1/MOB1A/DCHS1/TJP2/LATS2/YWHAB/SOX11
GOBP_PLATELET_DEGRANULATION	GOBP_PLATELET_DEGRANULATION	128	0.390864	1.60077	0.000114564	0.00811752	0.00747817	3561	tags=12%, list=6%, signal=11%	HRG/ALB/ORM2/APOH/APOA1/ORM1/KNG1/AHSG/SCG3/SPP2/EGF/ABCC4/SELENOP/SERPINA4/APOOL
GOBP_TELOMERE_CAPPING	GOBP_TELOMERE_CAPPING	55	0.524584	1.96831	0.00012267	0.00859636	0.0079193	9698	tags=33%, list=17%, signal=27%	H4C3/H4C6/H4C2/H4C4/H4C13/H4C1/RAD50/SMG6/MAPK1/ERCC4/PRKDC/POT1/TNKS/TNKS2/NBN/NEK7/ATM/DCLRE1A
GOCC_PROTON_TRANSPORTING_TWO_SECTOR_ATPASE_COMPLEX	GOCC_PROTON_TRANSPORTING_TWO_SECTOR_ATPASE_COMPLEX	52	0.53771	1.99203	0.00012462	0.00863804	0.00795769	10282	tags=33%, list=18%, signal=27%	ATP6V0A4/ATP6V1G3/ATP6V0D2/ATP6V1B1/ATP6V1C2/ATP6V1A/ATP5F1B/ATP5F1A/ATP6V1C1/ATP6V1D/ATP6AP2/ATP6V1H/ATP6V1B2/ATP5PB/DMAC2L/ATP5MC3/PPIF
GOBP_ALCOHOL_BIOSYNTHETIC_PROCESS	GOBP_ALCOHOL_BIOSYNTHETIC_PROCESS	156	0.378882	1.66587	0.00012665	0.00867827	0.00799475	9635	tags=30%, list=17%, signal=25%	APOA5/CFTR/APOA1/CYP7A1/CYP3A4/PLCG2/LHCGR/HMGCS2/CES1/CYP51A1/PRKAA2/SC5D/PCK1/ASAH1/IMPA2/AVPR1B/ACER2/DHFRP1/NTSR1/ERLIN2/HMGCS1/GOT1/LPCAT3/SPTLC3/ACAA2/MBTPS2/IPPK/HMGCR/SNCA/ACLY/REST/SPTLC2/PRKAA1/PPIP5K2/INSIG1/GPAM/NUS1/IDI1/SPTLC1/DHFR/DHCR7/IP6K3/MIR30C1/SREBF2/FGF2/ASAH2/MIR185
GOBP_CORNIFICATION	GOBP_CORNIFICATION	113	-0.544018	-1.60761	0.000128044	0.00867827	0.00799475	10965	tags=43%, list=19%, signal=35%	PKP3/KRT82/KLK5/CELA2A/KRT33A/CASP14/KRT35/KLK13/KLK14/SPRR2G/KRT74/KRT40/KRT77/KRT6B/SPRR1A/KRT5/SPRR2D/KRT76/SPRR1B/SPRR3/KRT15/KRT3/KRT16/KRT4/TCHH/DSG3/KRT24/TGM5/KRT14/LCE3D/KRT6A/KRT75/KRT79/KRT6C/KRT38/IVL/KRT78/KRT34/SPRR2E/SPRR2A/PI3/SPINK6/DSC3/SPRR2F/KRT13/KRT26/KLK12/SPRR2B/RPTN
GOBP_NEGATIVE_REGULATION_OF_MEGAKARYOCYTE_DIFFERENTIATION	GOBP_NEGATIVE_REGULATION_OF_MEGAKARYOCYTE_DIFFERENTIATION	18	0.746146	2.11442	0.000129283	0.00867827	0.00799475	2059	tags=33%, list=4%, signal=32%	H4C3/H4C6/H4C2/H4C4/H4C13/H4C1
GOBP_MEGAKARYOCYTE_DIFFERENTIATION	GOBP_MEGAKARYOCYTE_DIFFERENTIATION	100	0.419418	1.76275	0.000134791	0.00882383	0.00812885	11125	tags=35%, list=20%, signal=28%	H4C3/H4C6/H4C2/H4C4/H4C13/H3C3/KIT/H3C7/H3C11/H4C1/H3C2/H3C1/SCIN/MTURN/FAXDC2/MED1/PTPN11/KMT2C/KAT2B/EP300/THBS1/RBBP5/WASF2/ASH2L/AGO1/GP1BA/KMT2A/SIN3A/RCOR1/GABPA/CNOT4/SP3/PRMT6/NR4A3/TNRC6B
GOCC_BRUSH_BORDER_MEMBRANE	GOCC_BRUSH_BORDER_MEMBRANE	59	0.525648	2.02268	0.000135082	0.00882383	0.00812885	9184	tags=37%, list=16%, signal=31%	ATP6V0A4/SLC26A3/LRP2/CUBN/SLC34A1/SLC26A4/ITLN1/SLC6A19/SLC5A1/ACE2/ATP7A/PDZK1/SLC6A18/SLC17A3/SHANK2/SLC7A9/LIMA1/ABCG2/GNA13/PEX19/CA4/SLC22A12
GOBP_ALPHA_AMINO_ACID_CATABOLIC_PROCESS	GOBP_ALPHA_AMINO_ACID_CATABOLIC_PROCESS	87	0.453906	1.84338	0.000135602	0.00882383	0.00812885	12337	tags=36%, list=22%, signal=28%	TAT/OTC/ARG1/AGXT/PAH/SLC25A21/ACAT1/ACADSB/DLD/AGXT2/GOT1/GLUD2/DDAH1/ALDH8A1/OGDH/DDO/SHMT1/ALDH4A1/ASRGL1/DLST/PPAT/MTRR/GLUD1/GOT2/GLS/ACMSD/OAT/PRODH/GLDC/CDO1/ATP2B4
GOBP_ALCOHOL_CATABOLIC_PROCESS	GOBP_ALCOHOL_CATABOLIC_PROCESS	55	0.522446	1.96028	0.000141422	0.0091096	0.00839211	6128	tags=27%, list=11%, signal=24%	ADH4/SULT2A1/CYP7A1/INPP5J/CEL/HAO1/AKR1D1/IMPA2/ALDH1B1/GK/NTSR1/SORD/SULT1C4/CYP39A1/GPD2
GOBP_PRIMARY_ALCOHOL_METABOLIC_PROCESS	GOBP_PRIMARY_ALCOHOL_METABOLIC_PROCESS	94	0.444302	1.81757	0.000146034	0.00931257	0.00857909	11105	tags=37%, list=20%, signal=30%	ADH1A/ADH4/SULT2A1/CYP1A2/ADH1C/TTR/CYP3A4/HAO1/AKR1C4/CYP1A1/CYP11A1/ALDH1A2/ADH6/RDH16/ALDH1B1/AKR1C1/CYP3A7/SULT1C4/NAPEPLD/GPD2/ALDH3A2/DHRS9/REST/SULT1B1/ADH5/PNPLA4/GDE1/CBR4/RDH10/DGAT2/RETSAT/ACSS1/ADH1B/RBP4/AKR1C2
GOBP_ISOPRENOID_METABOLIC_PROCESS	GOBP_ISOPRENOID_METABOLIC_PROCESS	142	0.377326	1.6233	0.000154929	0.00963946	0.00888024	9119	tags=28%, list=16%, signal=24%	ADH1A/ADH4/APOC3/APOA2/CYP1A2/APOA1/ADH1C/CRH/TTR/CYP3A4/AKR1C4/HMGCS2/LRP2/CYP1A1/ALDH1A2/UGT1A9/ADH6/RDH16/GPC6/AKR1C1/CYP3A7/HMGCS1/PHYH/ALDH8A1/NAPEPLD/GPC3/HMGCR/ALDH3A2/PDSS2/CRPPA/EGFR/DHRS9/ADH5/UGT1A1/NUS1/IDI1/GPC4/HSPG2/CYP4V2/PNPLA4
GOBP_PHAGOCYTOSIS_RECOGNITION	GOBP_PHAGOCYTOSIS_RECOGNITION	90	-0.561743	-1.62492	0.000155399	0.00963946	0.00888024	12926	tags=54%, list=23%, signal=42%	TRBC2/SFTPA1/IGHV4-59/IGHV3-35/IGLL1/TULP1/IGHV3-72/IGHA1/IGHV7-4-1/IGHV3-38/IGHV5-51/IGHV3-53/IGHV4-4/PTX3/IGHD/IGHG4/IGHV1-58/IGHV3-13/IGHV1OR15-1/IGHV1-69D/IGHA2/IGHV4-34/IGHV5-10-1/IGHV3-21/IGHV3-66/IGHM/IGHV3-64D/IGHV2-70/IGLC6/IGHV4-39/IGLC2/IGHV1-18/IGHG3/IGHG1/IGHV3-33/IGHG2/IGKC/IGLC7/IGHV1-69/IGHV6-1/IGLL5/IGHV3-64/IGHV1-69-2/IGHV3-30/IGHV1-24/IGLC3/LBP/IGHV3-73/CRP
GOBP_TERPENOID_METABOLIC_PROCESS	GOBP_TERPENOID_METABOLIC_PROCESS	123	0.392929	1.64729	0.000155695	0.00963946	0.00888024	6024	tags=20%, list=11%, signal=18%	ADH1A/ADH4/APOC3/APOA2/CYP1A2/APOA1/ADH1C/CRH/TTR/CYP3A4/AKR1C4/HMGCS2/LRP2/CYP1A1/ALDH1A2/UGT1A9/ADH6/RDH16/GPC6/AKR1C1/CYP3A7/HMGCS1/ALDH8A1/NAPEPLD/GPC3
GOBP_TYROSINE_METABOLIC_PROCESS	GOBP_TYROSINE_METABOLIC_PROCESS	12	0.819993	2.09458	0.000159028	0.0097512	0.00898318	2640	tags=33%, list=5%, signal=32%	TAT/TYR/PAH/IYD
GOBP_DICARBOXYLIC_ACID_METABOLIC_PROCESS	GOBP_DICARBOXYLIC_ACID_METABOLIC_PROCESS	96	0.424007	1.74917	0.000160811	0.00976656	0.00899733	13187	tags=48%, list=23%, signal=37%	TAT/HAL/ALDH1L1/L2HGDH/PCK1/ALDH5A1/DLD/DHFRP1/GOT1/PHYH/GLUD2/SUCLG2/AMDHD1/OGDH/ACLY/GCLC/DDO/SHMT1/ALDH4A1/DLST/MTHFD1/DHFR/ME1/MTHFS/GCLM/DHFR2/MTRR/FH/ADSS2/GLUD1/GOT2/MDH1/GLS/ACMSD/DGLUCY/NAGS/OAT/SLC25A12/PRODH/ACOT4/SLC46A1/ME2/SDHB/PCK2/MDH2/KYAT3
GOMF_SOLUTE_SODIUM_SYMPORTER_ACTIVITY	GOMF_SOLUTE_SODIUM_SYMPORTER_ACTIVITY	72	0.468111	1.81988	0.000168881	0.0101599	0.00935971	7097	tags=33%, list=12%, signal=29%	SLC12A3/SLC4A9/SLC13A2/SLC6A15/SLC18A2/SLC10A1/SLC6A2/SLC10A2/SLC34A1/SLC4A4/SLC13A1/SLC6A4/SLC5A8/SLC5A1/SLC12A1/SLC5A12/SLC4A5/SLC1A1/SLC17A2/SLC10A5/SLC17A3/SLC12A2/SLC38A1/SLC5A2
GOBP_REGULATION_OF_MEGAKARYOCYTE_DIFFERENTIATION	GOBP_REGULATION_OF_MEGAKARYOCYTE_DIFFERENTIATION	83	0.444714	1.80278	0.000175405	0.0104538	0.00963044	11125	tags=36%, list=20%, signal=29%	H4C3/H4C6/H4C2/H4C4/H4C13/H3C3/H3C7/H3C11/H4C1/H3C2/H3C1/SCIN/MTURN/FAXDC2/KMT2C/KAT2B/EP300/THBS1/RBBP5/ASH2L/AGO1/GP1BA/KMT2A/SIN3A/RCOR1/GABPA/CNOT4/PRMT6/NR4A3/TNRC6B
GOBP_REGULATION_OF_STEROID_METABOLIC_PROCESS	GOBP_REGULATION_OF_STEROID_METABOLIC_PROCESS	121	0.401013	1.64605	0.000181067	0.0106913	0.00984926	10310	tags=33%, list=18%, signal=27%	APOA5/APOA2/APOA1/CYP7A1/CGA/KIT/PPARGC1A/CES1/ABCB11/CYP51A1/ATP1A1/SC5D/FMO5/ASAH1/ERLIN2/HMGCS1/LPCAT3/EGR1/RORA/MBTPS2/HMGCR/EPHX2/RORC/TTC39B/REST/SIRT1/PRKAA1/INSIG1/GPAM/UGT1A1/IDI1/DHCR7/MIR30C1/SREBF2/MIR185/AGTR1/ACADL/FDFT1/DGAT2/ACACB
GOBP_PROTEIN_STABILIZATION	GOBP_PROTEIN_STABILIZATION	190	0.338327	1.55906	0.000198749	0.0116277	0.0107119	14933	tags=45%, list=26%, signal=33%	APOA2/APOA1/H1-5/CRYAA/PPARGC1A/AFM/A1CF/GBA3/ANK2/USP2/EPHA4/DSG1/GOLGA7/PRKN/PFN2/TRIM44/STXBP1/SAV1/USP9X/CREBL2/ATP1B1/PINK1/TBL1X/SEL1L/HSP90AB2P/PLPP3/HSP90AB3P/RABL3/PER3/EP300/ZBED3/CREB1/PEX19/LAMP2/STX12/NAA15/MTMR9/BAG1/MUL1/BAG5/CHP1/HSPD1/MARCHF7/USP33/STK3/STXBP4/AAK1/HSP90AA1/PIK3R1/NAPG/BAG4/PHB/TCP1/CCT4/GNAQ/RAB21/MFSD1/MORC3/PTEN/PRKRA/PDCD10/TAF1/USP19/TAF9B/HSP90AB1/ATF7IP/RT…
GOBP_ORGANELLE_DISASSEMBLY	GOBP_ORGANELLE_DISASSEMBLY	107	0.402868	1.68531	0.000213586	0.0123821	0.0114069	16860	tags=52%, list=30%, signal=37%	PPARGC1A/PLK5/CTSK/GFM2/VPS13D/RETREG1/GABARAPL1/SPATA18/PRKN/FZD5/VPS13C/PINK1/UFL1/HUWE1/ATG9A/MFN2/ZFAND1/SREBF2/KIF5B/MUL1/BECN1/HTT/ATG2B/BNIP3L/RB1CC1/FBXO7/MTIF2/USP30/DYRK3/RNF41/VDAC1/UBA5/AMBRA1/ATG5/UFM1/HIF1A/GBA/PELO/OPTN/WIPI1/ATG14/GABARAPL2/CSNK2A2/SPAST/DENR/SQSTM1/ATG7/HK2/MAP1LC3B/BNIP3/ATG3/FUNDC2/VCP/WDR45B/DNM1L/GBF1
GOBP_COMPLEMENT_ACTIVATION_ALTERNATIVE_PATHWAY	GOBP_COMPLEMENT_ACTIVATION_ALTERNATIVE_PATHWAY	18	0.733825	2.07951	0.000220515	0.0126687	0.0116709	200	tags=17%, list=0%, signal=17%	CFHR5/C8B/C8A
GOBP_PIGMENT_METABOLIC_PROCESS	GOBP_PIGMENT_METABOLIC_PROCESS	72	0.463054	1.80022	0.000226893	0.0129187	0.0119012	10200	tags=33%, list=18%, signal=27%	AMBP/PMEL/TYR/HPX/PPARGC1A/TYRP1/GPR143/UGT1A9/IREB2/BCL2/UGT1A4/APPL1/FECH/IBA57/ALAS1/RAPGEF2/SHMT1/UGT1A1/PPAT/SLC45A2/OCA2/PGRMC1/NFE2L1/COX10
GOBP_POSITIVE_REGULATION_OF_RESPONSE_TO_WOUNDING	GOBP_POSITIVE_REGULATION_OF_RESPONSE_TO_WOUNDING	69	0.482109	1.8803	0.000233511	0.0131779	0.01214	8969	tags=28%, list=16%, signal=23%	HRG/APOH/VTN/CPB2/F7/OCLN/REG3G/ENPP4/ST3GAL4/ATP7A/ARFGEF1/PRKCE/DUOX2/PLPP3/HPSE/FERMT1/ANO6/PLG/THBS1
GOBP_POSITIVE_REGULATION_OF_STEROID_METABOLIC_PROCESS	GOBP_POSITIVE_REGULATION_OF_STEROID_METABOLIC_PROCESS	29	0.637624	2.06187	0.000263677	0.0146324	0.01348	2480	tags=24%, list=4%, signal=23%	APOA5/APOA2/APOA1/CYP7A1/CGA/PPARGC1A/CES1
GOMF_ORGANIC_ACID_TRANSMEMBRANE_TRANSPORTER_ACTIVITY	GOMF_ORGANIC_ACID_TRANSMEMBRANE_TRANSPORTER_ACTIVITY	156	0.368764	1.62138	0.000264436	0.0146324	0.01348	6639	tags=26%, list=12%, signal=23%	SLC26A7/SLC38A8/SLCO1B1/SLC13A2/SLC6A15/SLC10A1/SLC38A3/SLC16A7/SLC36A2/SLC22A9/AKR1C4/SLC10A2/SLC26A3/SLC7A13/ABCB11/SLC25A21/SLC26A4/SLC16A11/SLC16A12/SLC38A4/SLC6A19/SLC22A13/SLC27A2/SLC19A2/SLC5A8/SLCO1A2/SLC25A30/SLC22A2/SLC16A9/SLC16A10/SLC5A12/SLC47A1/SLC7A8/SLC6A18/SFXN2/ABCB1/SLC16A4/SLC1A1/SLC10A5/MPC1/SLC38A1
GOBP_RESPONSE_TO_XENOBIOTIC_STIMULUS	GOBP_RESPONSE_TO_XENOBIOTIC_STIMULUS	131	0.38652	1.61698	0.000266169	0.0146324	0.01348	8563	tags=26%, list=15%, signal=22%	CYP2A6/SULT2A1/UGT2B15/CYP1A2/SULT1C3/CYP2A7/GSTA3/UGT2B28/CYP3A4/AADAC/CES1/ARNT2/ACSL1/CYP1A1/FMO2/UGT1A9/AKR1C1/FMO1/CYP3A7/UGT1A4/CYP2B6/RORA/RORC/CYP2U1/UGT1A6/SLITRK5/CMBL/BPHL/DPEP1/SULT1B1/UGT1A1/CYP2J2/RB1/CRYZ
GOBP_REGULATION_OF_COAGULATION	GOBP_REGULATION_OF_COAGULATION	70	0.467193	1.79198	0.000270336	0.0147345	0.0135739	4124	tags=16%, list=7%, signal=15%	HRG/SERPINC1/APOH/VTN/KNG1/CPB2/F7/PROC/F11/ADTRP/ENPP4
GOBP_URONIC_ACID_METABOLIC_PROCESS	GOBP_URONIC_ACID_METABOLIC_PROCESS	24	0.677114	2.10413	0.000291152	0.0157117	0.0144742	11026	tags=62%, list=19%, signal=50%	UGT2B15/UGT2B4/UGT2B28/UGT2A3/UGT1A9/XYLB/UGT1A4/SORD/PRKCE/UGT1A6/CRYL1/UGT1A1/UGT2B7/UGT2A1/ABHD10
GOBP_REGULATION_OF_VASCULAR_ASSOCIATED_SMOOTH_MUSCLE_CELL_DIFFERENTIATION	GOBP_REGULATION_OF_VASCULAR_ASSOCIATED_SMOOTH_MUSCLE_CELL_DIFFERENTIATION	23	0.678431	2.08366	0.000295198	0.0157117	0.0144742	6796	tags=35%, list=12%, signal=31%	FGF9/KIT/MIR15B/MIR100/MIR140/MIR26A1/NFATC3/MIR125B1
GOBP_NEGATIVE_REGULATION_OF_WOUND_HEALING	GOBP_NEGATIVE_REGULATION_OF_WOUND_HEALING	73	0.461025	1.79959	0.000295657	0.0157117	0.0144742	3473	tags=15%, list=6%, signal=14%	HRG/APOH/VTN/KNG1/CPB2/MIR1298/MIR15B/CLDN19/PROC/F11/ADTRP
GOMF_SODIUM_ION_TRANSMEMBRANE_TRANSPORTER_ACTIVITY	GOMF_SODIUM_ION_TRANSMEMBRANE_TRANSPORTER_ACTIVITY	146	0.358427	1.56215	0.000309467	0.0163097	0.0150251	8092	tags=28%, list=14%, signal=24%	SLC12A3/SLC4A9/SLC9A4/SLC24A2/SLC13A2/SLC6A15/SLC9A2/SLC18A2/HCN2/SLC10A1/SLC6A2/GRIK1/SCN2B/SLC10A2/ABCB11/SLC34A1/ATP1A1/SCNN1A/SLC4A4/GRIK5/SLC13A1/SLC6A4/SLC5A8/SLC5A1/ATP12A/SLC12A1/SLC5A12/SLC4A5/SLC1A1/SLC17A2/SCN2A/SLC10A5/SLC17A3/SLC12A2/SLC38A1/SLC24A1/SLC5A2/SCN9A/SLC5A3/SLC41A1/PKD2
GOBP_REGULATION_OF_LIPID_TRANSPORT	GOBP_REGULATION_OF_LIPID_TRANSPORT	151	0.359701	1.61385	0.00031953	0.016702	0.0153865	11840	tags=35%, list=21%, signal=28%	APOA5/APOC3/APOA2/APOA1/PON1/CRH/PLA2G3/CES1/EGF/AVPR1A/ACSL1/GALR1/ATP8A1/AVPR1B/ABCG8/ABCA8/NTSR1/LPCAT3/PRKN/PPARA/MIR26A1/MIR128-1/STXBP1/SLC12A2/ITGAV/EPRS1/CYP4A11/PLA2G4A/TTC39B/PTCH1/PTPN11/SIRT1/AGTR2/NUS1/ABCA1/THBS1/MIR30C1/SREBF2/MIR148A/TMEM30A/AGTR1/TMF1/ITGB1/SCP2/MAP2K6/PSEN1/ABCA12/RAB3GAP1/NFKB1/SYK/EDN1/KDM5B/FABP3
GOBP_REGULATION_OF_GENE_SILENCING	GOBP_REGULATION_OF_GENE_SILENCING	141	0.375036	1.61015	0.000336882	0.0174658	0.0160902	13056	tags=38%, list=23%, signal=29%	H4C3/H4C6/H1-5/H4C2/H4C4/H4C13/H1-4/H3C3/H3C7/H1-1/H3C11/H4C1/H3C2/H1-3/H3C1/TRIM71/RANBP2/NUP160/NUP133/NUP153/POLR2B/POM121/EGFR/IPO8/NUP205/NUP155/DHX9/NDC1/ZMPSTE24/NCOR1/NUP58/TPR/DDX6/PUM1/AGO1/NUP98/SIN3A/PUM2/SEH1L/FMR1/TNRC6B/MIER1/ADAR/AJUBA/H3C13/PPP3CA/PPARG/POLR2A/POLR2C/H1-6/NUP54/H4-16/H1-0
GOBP_NEGATIVE_REGULATION_OF_DELAYED_RECTIFIER_POTASSIUM_CHANNEL_ACTIVITY	GOBP_NEGATIVE_REGULATION_OF_DELAYED_RECTIFIER_POTASSIUM_CHANNEL_ACTIVITY	11	0.839913	2.10528	0.000357426	0.0182301	0.0167943	4251	tags=36%, list=7%, signal=34%	KCNE5/MTNR1B/ANK3/KCNE1B
GOBP_ACTION_POTENTIAL	GOBP_ACTION_POTENTIAL	133	0.38261	1.61764	0.000357999	0.0182301	0.0167943	8788	tags=28%, list=15%, signal=24%	MIR208A/KCNE5/HCN2/MTNR1B/KCNA1/SCN2B/DSG2/NPS/ATP1A1/GPD1L/CLDN19/ANK3/KCNA2/PTPN3/NEDD4L/AKAP6/DSP/KCNE1B/CACNA1D/ANK2/KCNJ3/AKAP9/NTSR1/USP53/DSC2/MYH14/SCN2A/NOS1AP/ATP1B1/PKP2/CTNNA3/SCN9A/KCNC2/FGF12/NUP155/CAMK2D/SLMAP
GOBP_BILE_ACID_BIOSYNTHETIC_PROCESS	GOBP_BILE_ACID_BIOSYNTHETIC_PROCESS	38	0.579854	1.95412	0.0003602	0.0182301	0.0167943	7982	tags=34%, list=14%, signal=29%	BAAT/CYP7A1/AKR1D1/AKR1C4/CES1/ABCB11/SLC27A2/OSBPL1A/CYP7B1/CYP39A1/OSBP/SIRT1/HSD17B4
GOBP_PHENOL_CONTAINING_COMPOUND_METABOLIC_PROCESS	GOBP_PHENOL_CONTAINING_COMPOUND_METABOLIC_PROCESS	106	0.399615	1.69034	0.000365298	0.0183426	0.0168979	8340	tags=31%, list=15%, signal=27%	SULT2A1/PMEL/INSM1/CGA/TYR/PAH/DIO1/RTL4/SNCB/TACR3/CTSK/TYRP1/IYD/GCNT4/GPR37/PNMT/SLC16A10/ATP7A/BCL2/PRKN/APPL1/DDC/SNCA/MED1/RNF180/DUOXA2/DUOX2/TGFB2/RAPGEF2/AGTR2/SULT1B1/BTBD9/MTPN
GOCC_RECYCLING_ENDOSOME	GOCC_RECYCLING_ENDOSOME	189	0.338721	1.55956	0.000371938	0.0185301	0.0170706	14734	tags=45%, list=26%, signal=33%	SLC26A7/CFTR/PLA2G3/TBC1D14/ABCB11/SORL1/RAB11FIP1/MYO5B/ATP11A/ANK2/ZDHHC2/RAB25/PLEKHB2/ARFGEF2/C1orf210/SLC31A1/ATP9A/SCAMP1/RAB11FIP2/SLC1A1/CLCN3/RAB11FIP4/ATP11C/ATP11B/CLCN4/LMTK2/RAB29/TNIK/AQP2/AP1G1/RAB14/RASSF9/RABEP1/RNF11/ATG9A/VTI1B/ABHD17B/MYO5A/RAB11FIP5/TUBGCP4/STX7/STX12/VPS50/RAP2A/AVL9/SYT11/ITGB1/RAB8B/NDRG1/APP/RAB4A/RAB10/VAMP3/RELCH/TFRC/TPP1/AMOTL2/ABHD17C/EEA1/PACSIN2/SC…
GOBP_RETINOL_METABOLIC_PROCESS	GOBP_RETINOL_METABOLIC_PROCESS	47	0.534651	1.92015	0.000378619	0.0187167	0.0172425	5206	tags=23%, list=9%, signal=21%	ADH1A/ADH4/CYP1A2/ADH1C/TTR/CYP3A4/CYP1A1/ALDH1A2/ADH6/RDH16/CYP3A7
GOBP_RESPONSE_TO_THYROID_HORMONE	GOBP_RESPONSE_TO_THYROID_HORMONE	23	0.670406	2.05901	0.000386907	0.0189793	0.0174844	9568	tags=48%, list=17%, signal=40%	KIT/PPARGC1A/F7/SLC34A1/THRB/RDX/MED1/GHSR/KLF9/CAB39/GCLM
GOBP_ANIMAL_ORGAN_REGENERATION	GOBP_ANIMAL_ORGAN_REGENERATION	73	0.452985	1.76821	0.000392558	0.0191095	0.0176044	11040	tags=34%, list=19%, signal=28%	BAAT/NR0B2/APOA1/CPB2/F7/PTPN3/PDX1/PRMT5/CCND1/IGF2R/MED1/CPT1A/EGFR/WDR35/PTCH1/TGFBR2/UGT1A1/TGFBR3/PPAT/ANXA3/RGN/PHB/PRPS2/NR4A3/TYMS
GOMF_CHOLESTEROL_BINDING	GOMF_CHOLESTEROL_BINDING	50	0.518105	1.89259	0.000395829	0.0191227	0.0176166	5251	tags=20%, list=9%, signal=18%	APOA5/APOC3/APOA2/APOA1/APOF/PROM1/OSBPL1A/GRAMD1C/OSBPL8/ERLIN2
GOMF_ANTIPORTER_ACTIVITY	GOMF_ANTIPORTER_ACTIVITY	85	0.418013	1.68984	0.000402093	0.0192793	0.0177608	7953	tags=27%, list=14%, signal=23%	SLC26A7/SLC4A1/SLC4A9/SLC9A4/SLC24A2/SLC9A2/SLC38A3/SLC22A9/SLC26A3/SLC26A4/CLCN5/SLC25A5/SLC25A30/SLC47A1/SLC25A4/SLC4A5/SLC47A2/CLCN3/SLC24A1/CLCN4/TMCO3/SLC35D1/SLC41A1
GOBP_BLOOD_COAGULATION_INTRINSIC_PATHWAY	GOBP_BLOOD_COAGULATION_INTRINSIC_PATHWAY	17	0.763504	2.14369	0.000420102	0.0199893	0.0184149	513	tags=24%, list=1%, signal=23%	SERPINC1/F9/APOH/KNG1
GOBP_BRANCHED_CHAIN_AMINO_ACID_METABOLIC_PROCESS	GOBP_BRANCHED_CHAIN_AMINO_ACID_METABOLIC_PROCESS	23	0.668137	2.05204	0.00042703	0.0199893	0.0184149	10112	tags=61%, list=18%, signal=50%	ALDH6A1/ACAT1/ACADSB/DLD/BCKDHB/AUH/DBT/HIBCH/HIBADH/MCCC1/MCCC2/ACAD8/SLC25A44/IVD
GOMF_BICARBONATE_TRANSMEMBRANE_TRANSPORTER_ACTIVITY	GOMF_BICARBONATE_TRANSMEMBRANE_TRANSPORTER_ACTIVITY	21	0.675888	2.02111	0.00042764	0.0199893	0.0184149	5742	tags=43%, list=10%, signal=39%	SLC26A7/SLC4A1/CFTR/SLC4A9/SLC26A3/SLC26A4/SLC4A4/SLC39A8/SLC4A5
GOBP_SELECTIVE_AUTOPHAGY	GOBP_SELECTIVE_AUTOPHAGY	62	0.482556	1.86718	0.00042944	0.0199893	0.0184149	15065	tags=50%, list=26%, signal=37%	KLHL3/VPS13D/RETREG1/WDFY3/PRKN/VPS13C/PINK1/UFL1/HUWE1/SPTLC2/ADRB2/UBQLN1/MFN2/SPTLC1/BECN1/HTT/ATG2B/RB1CC1/USP30/RNF41/VDAC1/UBA5/AMBRA1/ATG5/STBD1/UFM1/CALCOCO2/OPTN/ATG14/SQSTM1/LGALS8
GOBP_RESPONSE_TO_NUTRIENT	GOBP_RESPONSE_TO_NUTRIENT	165	0.354007	1.56901	0.000443494	0.0204685	0.0188564	8335	tags=24%, list=15%, signal=20%	SERPINC1/APOA1/OTC/GCGR/ARG1/TYR/OXCT1/AMELX/CASR/SST/F7/TTPA/NNT/BMP7/SLC34A1/SLC6A19/SLC6A4/ACSL1/CYP1A1/ALDH1A2/AGL/CAT/BCKDHB/ABCG8/PDX1/HMGCS1/SFRP1/CCND1/PKLR/CYBB/MED1/MIR125B1/PDK2/ITGA2/EGFR/TGFBR2/TNKS/NCOA1/UGT1A1
GOBP_PROTEIN_MONOUBIQUITINATION	GOBP_PROTEIN_MONOUBIQUITINATION	66	0.469674	1.81838	0.000446154	0.0204685	0.0188564	14587	tags=56%, list=26%, signal=42%	NEURL1/RAG1/PRKN/CUL3/PCGF5/CDC73/CTR9/RNF20/HUWE1/KLHL12/PEX12/DDB1/TOPORS/WAC/UBE2E1/BCOR/WDR48/CUL4B/MARCHF7/UBE2D3/CBL/UBE2W/FBXL2/RYBP/BIRC2/RNF40/TRIM37/KBTBD8/TRIM25/UBB/DTX3L/TSG101/SKP1/BMI1/FANCM/LEO1/RNF2
GOBP_HIGH_DENSITY_LIPOPROTEIN_PARTICLE_CLEARANCE	GOBP_HIGH_DENSITY_LIPOPROTEIN_PARTICLE_CLEARANCE	15	0.770557	2.13591	0.00046567	0.0212113	0.0195406	2562	tags=27%, list=5%, signal=25%	APOC3/APOA2/APOA1/CUBN
GOMF_ODORANT_BINDING	GOMF_ODORANT_BINDING	114	-0.520252	-1.53752	0.000470328	0.0212715	0.0195961	17938	tags=54%, list=32%, signal=37%	OR5H1/OR5P2/OR5P3/OR5H14/OR8B2/OR8J2/OR8U1/OR9Q1/OR10J4/OR2A4/OR10W1/OR6K2/OR8D1/OR5H6/OBP2B/OR2A25/OR8D4/OR5H2/OR8J3/OR5AR1/OR5I1/OR5AU1/GPR148/OR14C36/OR13A1/OR10J3/OR11L1/OR5M3/OR8B4/OR8K5/OR8H1/OR10Z1/OR8H3/OR10J1/OR5L1/OR8I2/OR10R2/OR4E2/OR1K1/OR10V1/OR8B12/OR6B2/OR5AS1/OR8J1/OR5J2/OR6N2/OR5A1/OR8K3/OR8G2P/OR8H2/OR6B3/OR5C1/OR8A1/OR4E1/OR5AC2/OR10K1/OR8K1/OR5AP2/OR5M10/OR5F1/OR5W2
GOBP_MITOCHONDRIAL_FISSION	GOBP_MITOCHONDRIAL_FISSION	42	0.553104	1.92294	0.0004792	0.0215201	0.0198252	11532	tags=48%, list=20%, signal=38%	PPARGC1A/SPIRE1/MAPT/LRRK2/TMEM135/PRKN/DDHD2/PINK1/MIEF1/SLC25A46/OPA1/VPS35/KDR/MTFR1/AP3B1/MUL1/COX10/MARCHF5/C11orf65/GDAP1
GOBP_ONE_CARBON_COMPOUND_TRANSPORT	GOBP_ONE_CARBON_COMPOUND_TRANSPORT	12	0.796089	2.03352	0.000482984	0.0215384	0.019842	3494	tags=42%, list=6%, signal=39%	AQP6/AQP5/SLC14A2/AQP10/CA2
GOMF_ATPASE_BINDING	GOMF_ATPASE_BINDING	85	0.413385	1.67113	0.000488356	0.0216267	0.0199234	10854	tags=31%, list=19%, signal=25%	ATP6V0A4/ATP6V1G3/PTPN3/TRPC5/ANK2/PGR/RDX/AR/SLC2A13/SVIP/ATP1B1/PDE4D/EGFR/TOR1AIP1/UBE4B/PKD2/PEX19/ABCA1/USP25/ALDOB/ANK1/PSEN1/SLC26A9/RALB/RAB3A/RAB4A
GOBP_NEGATIVE_REGULATION_OF_VASCULAR_ASSOCIATED_SMOOTH_MUSCLE_CELL_DIFFERENTIATION	GOBP_NEGATIVE_REGULATION_OF_VASCULAR_ASSOCIATED_SMOOTH_MUSCLE_CELL_DIFFERENTIATION	12	0.79469	2.02995	0.000511119	0.0224786	0.0207082	6395	tags=42%, list=11%, signal=37%	FGF9/MIR15B/MIR100/MIR26A1/NFATC3
GOBP_IRON_ION_TRANSPORT	GOBP_IRON_ION_TRANSPORT	79	0.438067	1.7447	0.000519494	0.0226905	0.0209034	5085	tags=18%, list=9%, signal=16%	HRG/ATP6V0A4/ATP6V1G3/ATP6V0D2/ATP6V1B1/ATP6V1C2/HPX/ATP6V1A/NOX5/SLC40A1/SLC39A8/IREB2/MMGT1/ATP7A
GOBP_REGULATION_OF_ACTIN_FILAMENT_BUNDLE_ASSEMBLY	GOBP_REGULATION_OF_ACTIN_FILAMENT_BUNDLE_ASSEMBLY	100	0.39297	1.65159	0.000556148	0.0241262	0.022226	15774	tags=54%, list=28%, signal=39%	APOA1/FRMD7/PPM1E/PFN3/MIR138-1/RDX/VIL1/CGNL1/LIMCH1/PPP1R9A/PRKN/SFRP1/ARHGAP28/PFN2/CLASP2/ARHGAP6/PHLDB2/ALMS1/ROCK1/CARMIL1/WNT11/MKKS/SWAP70/MET/WASF2/TACSTD2/PIK3R1/BAG4/LPAR1/ROCK2/PAK2/MTOR/ARAP1/TJP1/NOX4/TPM1/S1PR1/PAK1/NRP1/RHOA/CDC42/TGFBR1/DLC1/PPFIA1/SDC4/SMAD3/CLASP1/MYOC/FERMT2/CCDC88A/PTGER4/TSC1/ARHGEF5/CX3CL1
GOMF_TETRAPYRROLE_BINDING	GOMF_TETRAPYRROLE_BINDING	150	0.355315	1.57989	0.000578047	0.0249008	0.0229395	7202	tags=21%, list=13%, signal=19%	HRG/CYP2A6/CYP17A1/CYP1A2/AMBP/CYP2A7/CYP7A1/HBG1/CYP3A4/HBG2/CUBN/CYP51A1/NGB/FA2H/CYP1A1/CYP11A1/MMUT/NOX5/CAT/CYP3A7/MPO/CYP7B1/CYP2B6/CYP39A1/SDHC/CYBB/SDHD/LMBRD1/CYP4A11/CYP2U1/DUOX2/CYCS
GOCC_CHYLOMICRON	GOCC_CHYLOMICRON	13	0.794814	2.08088	0.000581812	0.0249008	0.0229395	439	tags=38%, list=1%, signal=38%	APOA5/APOC3/APOA2/APOH/APOA1
GOBP_PROTEIN_CONTAINING_COMPLEX_REMODELING	GOBP_PROTEIN_CONTAINING_COMPLEX_REMODELING	35	0.574096	1.94668	0.000598558	0.0253658	0.023368	815	tags=17%, list=1%, signal=17%	APOA5/ALB/APOC3/APOA2/APOA1/PLA2G3
GOCC_KERATIN_FILAMENT	GOCC_KERATIN_FILAMENT	95	-0.548492	-1.59908	0.000600633	0.0253658	0.023368	14716	tags=56%, list=26%, signal=41%	KRT72/KRTAP29-1/KRTAP4-2/KRTAP4-11/KRTAP10-2/KRTAP5-10/KRTAP12-4/KRTAP10-9/KRTAP4-4/KRTAP4-6/FBF1/KRTAP10-7/KRT82/KRTAP5-5/KRTAP10-3/KRTAP4-12/KRTAP9-1/KRTAP16-1/CASP14/KRTAP5-11/KRTAP3-1/KRT74/KRTAP24-1/KRTAP1-3/KRT77/KRTAP9-9/KRT6B/KRTAP5-4/KRT5/KRTAP2-3/KRT76/KRT3/KRT4/KRTAP10-4/KRTAP4-3/KRTAP10-10/KRT14/KRT6A/KRT75/KRTAP3-3/KRT79/KRT6C/KRTAP12-1/KRT78/KRTAP12-3/KRTAP4-5/KRTAP10-1/KRTAP9-4/KRT…
GOMF_HEAT_SHOCK_PROTEIN_BINDING	GOMF_HEAT_SHOCK_PROTEIN_BINDING	123	0.373382	1.56535	0.000612501	0.0256968	0.0236729	14031	tags=39%, list=25%, signal=29%	APOA2/APOA1/PACRG/METTL21C/CYP1A1/GPR37/KCNJ11/MAPT/ST13P4/ST13P5/PRKN/HSPA8/DNAJB9/SLC12A2/SNCA/DNAJB14/ST13/DNAJA4/TFAM/HSPA13/HSPA9/KDR/CREB1/TPR/APAF1/BCOR/BAG1/BAG5/HTT/NR3C1/BAG4/FGF1/EIF2AK3/DNAJC18/CSNK2A1/DNAJA2/USP19/DNAJA1/HSP90AB1/ITGAM/CDC37L1/DNAJA3/FAF1/HSPA1L/CYP2E1/HIF1A/HDAC2/PTGES3
GOBP_REGULATION_OF_MITOCHONDRIAL_FISSION	GOBP_REGULATION_OF_MITOCHONDRIAL_FISSION	27	0.637495	2.04921	0.000634339	0.0264391	0.0243567	10547	tags=52%, list=19%, signal=42%	PPARGC1A/SPIRE1/MAPT/LRRK2/TMEM135/PRKN/DDHD2/PINK1/MIEF1/VPS35/KDR/MUL1/MARCHF5/C11orf65
GOBP_LIPOPROTEIN_METABOLIC_PROCESS	GOBP_LIPOPROTEIN_METABOLIC_PROCESS	131	0.374588	1.56706	0.000640994	0.026543	0.0244524	11501	tags=34%, list=20%, signal=27%	HHATL/APOA5/APOC3/APOA2/APOA1/CWH43/ZDHHC23/ZDHHC15/ZDHHC2/HHAT/GOLGA7/PPARA/PGAP4/PPM1A/RAB3GAP2/ZDHHC3/ITGAV/SVIP/PGAP1/APOLD1/PIGO/LYPLA1/PIK3C3/RABL3/PIGH/ABHD17B/GPLD1/ZDHHC21/ATM/ZDHHC9/ZDHHC4/PIGN/NMT2/PIGS/DGAT2/MPPE1/PIGK/PIGB/ABHD13/RAB3GAP1/PIGA/ABHD10/PIGF/PIGV/ABHD17C
GOMF_STEROL_BINDING	GOMF_STEROL_BINDING	60	0.485281	1.86866	0.000648999	0.0266161	0.0245198	13330	tags=50%, list=23%, signal=38%	APOA5/APOC3/APOA2/APOA1/APOF/PROM1/OSBPL1A/GRAMD1C/OSBPL8/ERLIN2/RORA/OSBP/RORC/PTCH1/INSIG1/ABCA1/OSBPL11/SCARB2/SCP2/VDAC2/STARD3NL/OSBPL10/ABCG1/SOAT1/NPC1/ERLIN1/VDAC1/OSBP2/STARD4/OSBPL9
GOBP_NCRNA_EXPORT_FROM_NUCLEUS	GOBP_NCRNA_EXPORT_FROM_NUCLEUS	38	0.562977	1.89724	0.000651108	0.0266161	0.0245198	17200	tags=66%, list=30%, signal=46%	RANBP2/NUP160/NUP133/NUP153/POM121/NUP205/NUP155/NDC1/NUP58/TPR/NUP98/SEH1L/PHAX/NPM1/NUP54/NUP88/NUP50/TSC1/POM121C/NUP37/NUP214/NUP42/XPOT/NUP43/SSB
GOCC_MICROBODY_MEMBRANE	GOCC_MICROBODY_MEMBRANE	61	0.474883	1.82301	0.000663079	0.0269328	0.0248115	15648	tags=62%, list=28%, signal=45%	SLC27A2/ACSL1/CAT/TMEM35A/TMEM135/PNPLA8/ACBD5/HMGCR/ALDH3A2/ABCD3/AGPS/PEX1/PEX3/FNDC5/HSD17B4/ATAD1/PEX7/PEX19/PEX12/ACSL3/PEX11A/ACOX1/FAR2/PEX2/RAB8B/SYT7/ACSL4/PECR/DAO/PEX13/PXMP4/PEX10/FAR1/GNPAT/MAVS/PEX5/SLC25A17/PEX11B
GOCC_INTERMEDIATE_FILAMENT_CYTOSKELETON	GOCC_INTERMEDIATE_FILAMENT_CYTOSKELETON	255	-0.456965	-1.40728	0.000691495	0.0278616	0.0256672	14909	tags=40%, list=26%, signal=30%	KRTAP26-1/KRT72/KRTAP19-1/KRTAP29-1/KRTAP4-2/PKP1/KRTAP13-3/KRTAP23-1/KRTAP4-11/KRT28/KRTAP13-2/KRT19/KRT25/NME1/KRTAP10-2/KRT39/KRTAP5-10/KRTAP20-3/KRTAP12-4/KRTAP10-9/KRTAP4-4/KRTAP4-6/FBF1/KRT31/KRTAP10-7/SCYGR3/KRT82/CARMIL2/PRPH/KRTAP5-5/KRTAP10-3/KRTAP4-12/KRTAP9-1/KRT33A/KRTAP16-1/CASP14/SYCE1L/KRTAP5-11/KRTAP20-4/SCYGR8/KRT35/DES/KRTAP19-5/KRTAP3-1/KRTAP27-1/KRT74/SLC1A6/KRTAP24-1/KRT40/S…
GOBP_GLUTAMINE_FAMILY_AMINO_ACID_METABOLIC_PROCESS	GOBP_GLUTAMINE_FAMILY_AMINO_ACID_METABOLIC_PROCESS	74	0.443025	1.7256	0.000694684	0.0278616	0.0256672	11722	tags=39%, list=21%, signal=31%	TAT/OTC/ARG1/CPS1/HAL/ALDH5A1/SLC39A8/GLYATL1/GOT1/GLUD2/DDAH1/AMDHD1/GCLC/AGMAT/GFPT1/ALDH4A1/ASRGL1/PPAT/MTHFS/GCLM/GLUD1/GOT2/GLS/DGLUCY/NAGS/OAT/MECP2/SLC25A12/PRODH
GOBP_MICROTUBULE_ANCHORING	GOBP_MICROTUBULE_ANCHORING	27	0.633358	2.03591	0.000700892	0.0279349	0.0257347	15554	tags=70%, list=27%, signal=51%	CCDC68/GCC2/CLASP2/PCM1/DCTN1/CEP350/CCDC187/CEP20/GSK3B/CEP57/KIF3A/NIN/BBS4/DAG1/SAXO1/NINL/CLASP1/HOOK3/BICD2
GOBP_RESPONSE_TO_TUMOR_CELL	GOBP_RESPONSE_TO_TUMOR_CELL	28	0.613355	1.97878	0.000708377	0.0280579	0.025848	9980	tags=43%, list=18%, signal=35%	HRG/PLK5/SLC22A13/IL12B/HAVCR2/CEACAM1/TXNIP/HNMT/MR1/CASC2/HSPD1/FBXO38
GOBP_NON_RECOMBINATIONAL_REPAIR	GOBP_NON_RECOMBINATIONAL_REPAIR	106	0.388478	1.64323	0.000721435	0.0283987	0.026162	15795	tags=49%, list=28%, signal=35%	H4C3/DNTT/H4C6/H4C2/H4C4/H4C13/H4C1/ABRAXAS1/RAD50/NHEJ1/USP51/RBBP8/RIF1/ERCC4/TP53BP1/PRKDC/SETMAR/POT1/SHLD2/NBN/POLA1/ATM/DCLRE1A/SMCHD1/PAXIP1/BRCC3/KAT5/ERCC8/TFIP11/XRCC5/ERCC6/HERC2/KMT5B/RNF138/DTX3L/H4-16/UVRAG/LIG4/BRCA1/XRCC6/H4C12/KDM4D/MRE11/MLH1/XRCC4/BARD1/RNF8/H4C5/PARP9/UBE2V2/CYREN/MDC1
GOBP_ACETYL_COA_BIOSYNTHETIC_PROCESS_FROM_PYRUVATE	GOBP_ACETYL_COA_BIOSYNTHETIC_PROCESS_FROM_PYRUVATE	15	0.755468	2.09408	0.000780759	0.0303486	0.0279583	12712	tags=87%, list=22%, signal=67%	DLAT/PDK4/DLD/PDP1/PDHA2/PDP2/PDK2/PDK1/PDHX/PDK3/PDHA1/PDHB/PDPR
GOBP_REGULATION_OF_CELLULAR_RESPONSE_TO_HEAT	GOBP_REGULATION_OF_CELLULAR_RESPONSE_TO_HEAT	79	0.430525	1.71467	0.000781161	0.0303486	0.0279583	17088	tags=57%, list=30%, signal=40%	MAPT/HSPA8/MAPK1/RANBP2/NUP160/NUP133/NUP153/POM121/NUP205/SIRT1/EP300/NUP155/CAMK2D/NDC1/ATM/NUP58/TPR/BAG1/GSK3B/BAG5/HSP90AA1/NUP98/BAG4/SEH1L/MTOR/CREBBP/RPA1/ATR/HSPH1/HSP90AB1/NUP54/NUP88/HSPA1L/PTGES3/NUP50/YWHAE/POM121C/NUP37/NUP214/NUP42/FKBP4/NUP43/RPTOR/DNAJB1/RPA3
GOBP_SECONDARY_METABOLIC_PROCESS	GOBP_SECONDARY_METABOLIC_PROCESS	56	0.479388	1.80608	0.000785247	0.0303486	0.0279583	5941	tags=25%, list=10%, signal=22%	CYP2A6/CYP1A2/CYP2A7/PMEL/TYR/AKR1C4/TYRP1/CYP1A1/FMO2/AKR1C1/FMO1/BCL2/APPL1/DDC
GOBP_NEGATIVE_REGULATION_OF_COAGULATION	GOBP_NEGATIVE_REGULATION_OF_COAGULATION	51	0.501376	1.85107	0.000799845	0.0307266	0.0283065	3473	tags=16%, list=6%, signal=15%	HRG/APOH/VTN/KNG1/CPB2/PROC/F11/ADTRP
GOBP_BILE_ACID_SECRETION	GOBP_BILE_ACID_SECRETION	12	0.779246	1.9905	0.000811218	0.0309194	0.0284842	8041	tags=50%, list=14%, signal=43%	SLC10A1/CASR/CES1/ABCB11/SLC51B/PRKAA1
GOBP_WATER_TRANSPORT	GOBP_WATER_TRANSPORT	21	0.648102	1.93802	0.000814563	0.0309194	0.0284842	4089	tags=29%, list=7%, signal=27%	AQP6/CFTR/AQP5/AQP10/AQP4/SLC5A1
GOMF_FLAVIN_ADENINE_DINUCLEOTIDE_BINDING	GOMF_FLAVIN_ADENINE_DINUCLEOTIDE_BINDING	81	0.431026	1.7087	0.000846901	0.0319567	0.0294398	14682	tags=52%, list=26%, signal=39%	ACAD11/LDHD/ACADSB/ACADM/FMO5/FMO2/NOX5/AOX1/DLD/FMO1/CHDH/KDM1B/ETFDH/CRY2/MICAL3/CYBB/AGPS/DDO/ACAD8/MTRR/ACOX2/ACOX1/AIFM1/FMO4/ACADL/ETFA/IVD/MAOB/DPYD/GSR/PRODH/MTO1/ILVBL/NOX4/MMACHC/CYB5R1/TXNRD3/DAO/FOXRED2/CRY1/ACAD10/ACADS
GOBP_NUCLEAR_PORE_ORGANIZATION	GOBP_NUCLEAR_PORE_ORGANIZATION	14	0.74029	1.98112	0.000866273	0.032416	0.0298629	13051	tags=79%, list=23%, signal=61%	NUP133/NUP153/NUP205/NDC1/TPR/NUP98/TMEM170A/SEH1L/AHCTF1/NUP54/RTN4
GOBP_INORGANIC_ANION_TRANSPORT	GOBP_INORGANIC_ANION_TRANSPORT	171	0.339273	1.52941	0.000869239	0.032416	0.0298629	7126	tags=24%, list=13%, signal=21%	AQP6/BSND/SLC26A7/CLCNKB/SLC4A1/SLC12A3/CFTR/SLC4A9/GABRA2/ANO5/CASR/CLCNKA/SLC26A3/SLC22A8/SLC34A1/SLC26A4/GABRB2/ANO4/SLC4A4/GABRB3/SLC13A1/CLIC5/CLCN5/SLC25A30/SLC12A1/SLC39A8/GABRG1/PCYOX1/PRKG2/SLC4A5/ABCB1/SLC1A1/CLIC4/CLCN3/CRY2/SLC12A6/SLC17A3/SLC12A2/XPR1/GLRB/CLCN4
GOBP_CHROMATIN_REMODELING_AT_CENTROMERE	GOBP_CHROMATIN_REMODELING_AT_CENTROMERE	47	0.51226	1.83973	0.000937719	0.0347665	0.0320282	2059	tags=13%, list=4%, signal=12%	H4C3/H4C6/H4C2/H4C4/H4C13/H4C1
GOBP_HIGH_DENSITY_LIPOPROTEIN_PARTICLE_REMODELING	GOBP_HIGH_DENSITY_LIPOPROTEIN_PARTICLE_REMODELING	18	0.691673	1.96006	0.000947531	0.0349272	0.0321763	815	tags=28%, list=1%, signal=27%	ALB/APOC3/APOA2/APOA1/PLA2G3
GOBP_ETHANOL_OXIDATION	GOBP_ETHANOL_OXIDATION	12	0.770645	1.96853	0.00100844	0.0364636	0.0335917	4684	tags=42%, list=8%, signal=38%	ADH1A/ADH4/ADH1C/ADH6/ALDH1B1
GOBP_HETEROCHROMATIN_ORGANIZATION	GOBP_HETEROCHROMATIN_ORGANIZATION	80	0.421148	1.66425	0.00101157	0.0364636	0.0335917	2444	tags=14%, list=4%, signal=13%	H4C3/H4C6/H4C2/H4C4/H4C13/H3C3/H3C7/H3C11/H4C1/H3C2/H3C1
GOBP_PROTEIN_TARGETING_TO_VACUOLE	GOBP_PROTEIN_TARGETING_TO_VACUOLE	40	0.526013	1.8031	0.00101184	0.0364636	0.0335917	11576	tags=52%, list=20%, signal=42%	SORL1/VPS13D/NCOA4/ZFYVE16/HSPA8/GCC2/M6PR/VPS13C/VPS13A/VPS41/PIK3R4/VTI1B/LAMP2/AP3B1/NEDD4/AP3M1/SCARB2/GNPTAB/SORT1/VPS37A/VTI1A
GOCC_ADHERENS_JUNCTION	GOCC_ADHERENS_JUNCTION	172	0.328426	1.4778	0.00101564	0.0364636	0.0335917	12997	tags=44%, list=23%, signal=34%	CTNNA2/CDH7/LIN7A/MPP7/CDH20/CDH19/WNK3/CDH12/CDH9/SHROOM3/FMN1/STXBP6/EPB41L5/ARHGAP24/EPHA4/ITGA6/RDX/NECTIN3/MPP5/AJAP1/CCDC85A/CDH1/DSC2/APC/PLEKHA7/PTPRK/PKP2/SSX2IP/PARD3B/CTNNA3/BMPR2/KLHL24/PLPP3/FRS2/FAT2/CEACAM1/AFDN/CTNND2/EIF4G2/CRB1/SHROOM4/PKP4/PARD3/CCDC85C/DDX6/CDH2/ADAM10/LIN7C/SHROOM2/DLG1/CTNNB1/PTPRM/MAGI1/PGM5/NDRG1/ABI2/CXADR/RAB10/TSPAN33/FRMD4B/HMCN1/CNN3/SYNM/SNAP23/POF1B…
GOBP_REGULATION_OF_CELL_PROJECTION_ASSEMBLY	GOBP_REGULATION_OF_CELL_PROJECTION_ASSEMBLY	185	0.327366	1.5163	0.0010178	0.0364636	0.0335917	14846	tags=45%, list=26%, signal=33%	HRG/STAP1/FRMD7/KIT/OCLN/NEURL1/SLIT2/USP17L2/RAP1GAP/CDKL1/ARHGAP24/DCDC2/RDX/FNBP1L/ATP7A/PPP1R9A/COBL/PIK3CA/EPS8/F2RL1/APC/CDKL5/PFN2/ARHGAP35/ADAMTS16/P2RY12/NCKAP1/WASL/HAP1/NLGN1/FER/MNS1/SYNE2/CEP120/PODXL/FAM110C/MYO10/CCP110/PPP1R16B/AKIRIN1/HTT/P2RX7/WASF2/TACSTD2/TAPT1/TWF1/PIK3R1/CYFIP1/ACTR2/DMTN/IFT88/ATMIN/ABI2/FMR1/PLD1/KLF5/CEP97/MTOR/ARAP1/YAP1/BCAS3/GPM6A/VDAC3/DOCK11/PRKCD/CY…
GOBP_TRNA_TRANSPORT	GOBP_TRNA_TRANSPORT	37	0.561649	1.89105	0.00106215	0.0378398	0.0348595	17200	tags=65%, list=30%, signal=45%	TOMM20/RANBP2/NUP160/NUP133/NUP153/POM121/NUP205/NUP155/NDC1/NUP58/TPR/NUP98/SEH1L/TOMM20L/NUP54/NUP88/NUP50/POM121C/NUP37/NUP214/NUP42/XPOT/NUP43/SSB
GOMF_HEPARIN_BINDING	GOMF_HEPARIN_BINDING	164	0.334179	1.4838	0.0011063	0.0390543	0.0359783	2969	tags=10%, list=5%, signal=9%	DEFB106B/HRG/APOA5/SERPINC1/SERPIND1/APOH/VTN/FGF9/KNG1/SERPINA10/CEL/SMOC1/ELSPBP1/BMP7/SLIT2/SERPINA5
GOBP_RESPONSE_TO_HEPATOCYTE_GROWTH_FACTOR	GOBP_RESPONSE_TO_HEPATOCYTE_GROWTH_FACTOR	18	0.68698	1.94676	0.00111774	0.0390543	0.0359783	9568	tags=56%, list=17%, signal=46%	CASR/VIL1/APPL1/MED1/TDGF1/GAB1/LGMN/CREB1/APPL2/GCLM
GOBP_REGULATION_OF_STEROL_TRANSPORT	GOBP_REGULATION_OF_STEROL_TRANSPORT	66	0.445075	1.72314	0.00112255	0.0390543	0.0359783	9422	tags=29%, list=17%, signal=24%	APOA5/APOC3/APOA2/APOA1/PON1/CES1/EGF/ABCG8/ABCA8/LPCAT3/MIR26A1/MIR128-1/TTC39B/PTCH1/SIRT1/NUS1/ABCA1/SREBF2/MIR148A
GOMF_VITAMIN_BINDING	GOMF_VITAMIN_BINDING	145	0.336417	1.45281	0.00112589	0.0390543	0.0359783	11886	tags=39%, list=21%, signal=31%	ADH4/ALB/TAT/AGXT/GC/OGDHL/CALB1/TTPA/AFM/CUBN/KL/GNMT/FOLR3/PCCA/ALDH1A2/EGLN1/ABAT/MMUT/DHFRP1/ETNPPL/AGXT2/GOT1/PHYH/PANK3/DDC/SPTLC3/OGDH/LMBRD1/MCCC1/ALAS1/FTCDNL1/SPTLC2/SHMT1/VDR/MTARC2/DHTKD1/SPTLC1/DHFR/PLPBP/TPK1/CTH/MTHFS/PDXDC1/ACACB/MTR/GOT2/OPN3/OAT/PAM/TYMS/RBP4/TCN2/HLCS/P4HA1/GLDC/GGCX/HACL1
GOBP_CHROMATIN_ORGANIZATION_INVOLVED_IN_REGULATION_OF_TRANSCRIPTION	GOBP_CHROMATIN_ORGANIZATION_INVOLVED_IN_REGULATION_OF_TRANSCRIPTION	153	0.348468	1.537	0.00112686	0.0390543	0.0359783	2504	tags=12%, list=4%, signal=11%	H4C3/H4C6/H1-5/H4C2/H4C4/H4C13/H2AC21/H1-4/H3C3/H3C7/H1-1/H2AC4/H3C11/H4C1/H3C2/H1-3/H3C1/H2AC12
GOBP_CIRCADIAN_REGULATION_OF_GENE_EXPRESSION	GOBP_CIRCADIAN_REGULATION_OF_GENE_EXPRESSION	67	0.444105	1.71538	0.00116202	0.040055	0.0369002	8307	tags=30%, list=15%, signal=26%	PASD1/NR0B2/PPARGC1A/LGR4/USP2/NRIP1/NCOA2/PPARA/PRMT5/EGR1/CRY2/RORA/CLOCK/RORC/MYCBP2/HUWE1/GFPT1/SIRT1/PER3/KDM5A
GOCC_ENDOLYSOSOME	GOCC_ENDOLYSOSOME	23	0.643551	1.97653	0.00116933	0.0400903	0.0369327	8534	tags=35%, list=15%, signal=30%	HRG/CTSK/TLR3/CLTC/TLR7/TLR8/LGMN/AP2B1
GOCC_BRUSH_BORDER	GOCC_BRUSH_BORDER	101	0.396323	1.65695	0.00117631	0.0401141	0.0369547	9184	tags=33%, list=16%, signal=27%	ATP6V0A4/SLC26A3/DAB1/LRP2/CUBN/SLC34A1/SLC26A4/ITLN1/SLC6A19/PLS1/SLC2A2/SLC5A1/MYO7B/ACE2/VIL1/ATP7A/PDZK1/SLC6A18/MYH14/SLC17A3/CAPZA2/ENPEP/SHANK2/SLC7A9/ADD3/LIMA1/ANKS4B/MME/ABCG2/GNA13/PEX19/CA4/SLC22A12
GOCC_PORE_COMPLEX	GOCC_PORE_COMPLEX	23	0.640944	1.96853	0.00119248	0.0404063	0.0372238	13488	tags=65%, list=24%, signal=50%	C8B/C8A/C5/BCL2/PLEKHA7/C6/AFDN/ADAM10/PPIF/VDAC2/TSPAN33/VDAC1/VDAC3/TOMM40L/C7
GOMF_OXIDOREDUCTASE_ACTIVITY_ACTING_ON_THE_CH_CH_GROUP_OF_DONORS	GOMF_OXIDOREDUCTASE_ACTIVITY_ACTING_ON_THE_CH_CH_GROUP_OF_DONORS	59	0.475964	1.83149	0.00121356	0.0404063	0.0372238	14682	tags=54%, list=26%, signal=40%	AKR1D1/ACAD11/ACADSB/ACADM/TECRL/AKR1C1/SDHC/SDHD/ACAD8/SRD5A2/DHCR7/PTGR1/ACOX2/ACOX1/ACADL/IVD/RETSAT/CRAT/AKR1C2/DPYD/COX15/LBR/ZADH2/SDHAF4/SDHB/PECR/DHDH/PTGR2/BDH2/ACAD10/DECR1/ACADS
GOCC_PLATELET_ALPHA_GRANULE_LUMEN	GOCC_PLATELET_ALPHA_GRANULE_LUMEN	67	0.443152	1.7117	0.00121454	0.0404063	0.0372238	516	tags=9%, list=1%, signal=9%	HRG/ALB/ORM2/ORM1/KNG1/AHSG
GOBP_VASODILATION	GOBP_VASODILATION	36	0.541437	1.81825	0.00121583	0.0404063	0.0372238	9172	tags=33%, list=16%, signal=28%	CALCA/KNG1/ADRB1/CASR/CPS1/F2RL1/EDNRB/GUCY1A1/ADRB2/AGTR2/KCNMA1/MKKS
GOBP_RESPONSE_TO_AMINO_ACID_STARVATION	GOBP_RESPONSE_TO_AMINO_ACID_STARVATION	49	0.500067	1.80851	0.00121656	0.0404063	0.0372238	13156	tags=51%, list=23%, signal=39%	DAPL1/RRAGD/RNF152/MAPK1/SESN3/IMPACT/PRKD1/BECN1/EIF2AK2/LARS1/MIOS/MAP3K5/EIF2S1/SEH1L/MAPK8/EIF2AK3/MTOR/EIF2A/C12orf66/LARP1/EIF2AK4/GCN1/BMT2/SESN1/SH3GLB1
GOBP_SKIN_DEVELOPMENT	GOBP_SKIN_DEVELOPMENT	414	-0.417716	-1.30144	0.00127937	0.0422723	0.0389429	14716	tags=34%, list=26%, signal=25%	KRT72/CTSV/KRTAP19-1/KRTAP29-1/KRTAP4-2/PKP1/KRTAP13-3/KRTAP23-1/KRTAP4-11/KRT28/KRTAP13-2/KRT19/KRT25/KRTAP10-2/KRT39/KRTAP5-10/KRTAP12-4/COL5A1/LCE2B/POU3F1/LCE2D/KRTAP10-9/TGM3/KRTAP4-4/TCF15/FOXN1/DNASE1L2/KRTAP4-6/LCE2C/KRT31/KRTAP10-7/FGF10/LTB/COL1A1/PKP3/KRT82/KLK5/CELA2A/FST/KRTAP5-5/KRTAP10-3/WNT10A/KRTAP9-1/ACER1/KRT33A/KRTAP16-1/FOXE1/CASP14/WNT16/KRTAP5-11/KRT35/KLK13/KLK14/KRTAP19-5…
GOBP_RESPONSE_TO_HEAT	GOBP_RESPONSE_TO_HEAT	161	0.338689	1.51515	0.00129516	0.0425734	0.0392203	13563	tags=37%, list=24%, signal=28%	CALCA/CPB2/SST/ARPP21/MAPT/TFEC/HSPA8/PKLR/MAPK1/RANBP2/NUP160/NUP133/STAC/NUP153/DNAJA4/POM121/GCLC/HSP90AB2P/HSP90AB3P/NUP205/SIRT1/EP300/NUP155/CAMK2D/NDC1/THBS1/ATM/NUP58/TPR/BAG1/GSK3B/BAG5/DNAJB4/HSP90AA1/NUP98/BAG4/DHX36/EIF2S1/SLU7/SEH1L/FGF1/IL1A/MTOR/CREBBP/RPA1/ATR/DNAJA2/PSIP1/DNAJA1/HSPH1/HSP90AB1/NUP54/TRPV4/CLPB/IGF1/ATP2A2/DNAJA3/NUP88/CXCL10/HSPA1L
GOMF_PROTEIN_KINASE_A_BINDING	GOMF_PROTEIN_KINASE_A_BINDING	50	0.488519	1.78452	0.00131015	0.0428068	0.0394353	10824	tags=52%, list=19%, signal=42%	MYRIP/PKIA/C2orf88/AKAP6/CRYBG3/RDX/AKAP4/AKAP12/PJA2/LRRK2/ARFGEF2/AKAP9/AKAP11/AKAP3/ARFGEF1/PRKAR2A/DACT2/ACBD3/PRKAR1A/PRRC1/AKAP1/GSK3B/WASF2/AKAP7/AKAP10/AKAP13
GOBP_CENTROMERE_COMPLEX_ASSEMBLY	GOBP_CENTROMERE_COMPLEX_ASSEMBLY	56	0.466167	1.75627	0.00131739	0.0428068	0.0394353	2059	tags=11%, list=4%, signal=10%	H4C3/H4C6/H4C2/H4C4/H4C13/H4C1
GOBP_FATTY_ACID_BIOSYNTHETIC_PROCESS	GOBP_FATTY_ACID_BIOSYNTHETIC_PROCESS	168	0.33654	1.51494	0.0013224	0.0428068	0.0394353	13761	tags=44%, list=24%, signal=33%	APOA5/APOC3/CYP1A2/APOA1/PLA2G4F/CYP7A1/PLA2G3/CYP3A4/AVPR1A/ABHD2/HPGD/PRKAA2/PDK4/MIR204/FA2H/CYP1A1/ELOVL7/HACD3/TECRL/ERLIN2/SCD5/PNPLA8/HSD17B12/LIPC/ABCD3/EPHX2/ELOVL4/ACSM3/ACLY/PRKAG2/PLA2G4A/HACD2/PRKAB2/SIRT1/PRKAA1/INSIG1/FADS2B/CEACAM1/ABHD3/ACSBG1/ACSL3/MIR30C1/PLP1/CBR4/ASAH2/ACADL/QKI/RGN/ACACB/ACSS1/LIPH/LPGAT1/EDN1/MLYCD/ACSM6/ACSM5/ACOT4/PRKAB1/OLAH/PTGS1/HSD17B8/ERLIN1/ACACA/PE…
GOMF_ANKYRIN_BINDING	GOMF_ANKYRIN_BINDING	20	0.675464	1.9889	0.00136387	0.0438413	0.0403883	6604	tags=40%, list=12%, signal=35%	SLC4A1/RHCG/RHBG/ATP1A1/CACNA1D/KCNJ11/CDH1/SPTBN1
GOBP_REGULATION_OF_GENE_SILENCING_BY_RNA	GOBP_REGULATION_OF_GENE_SILENCING_BY_RNA	122	0.372304	1.56011	0.0013705	0.0438413	0.0403883	12382	tags=35%, list=22%, signal=28%	H4C3/H4C6/H4C2/H4C4/H4C13/H3C3/H3C7/H3C11/H4C1/H3C2/H3C1/TRIM71/RANBP2/NUP160/NUP133/NUP153/POLR2B/POM121/EGFR/IPO8/NUP205/NUP155/DHX9/NDC1/ZMPSTE24/NCOR1/NUP58/TPR/DDX6/PUM1/AGO1/NUP98/PUM2/SEH1L/FMR1/TNRC6B/ADAR/AJUBA/H3C13/PPP3CA/PPARG/POLR2A/POLR2C
GOBP_HUMORAL_IMMUNE_RESPONSE_MEDIATED_BY_CIRCULATING_IMMUNOGLOBULIN	GOBP_HUMORAL_IMMUNE_RESPONSE_MEDIATED_BY_CIRCULATING_IMMUNOGLOBULIN	148	-0.490137	-1.47312	0.00137498	0.0438413	0.0403883	16034	tags=56%, list=28%, signal=40%	IGKV4-1/IGHV2-5/IGLV3-19/IGHV2-26/BCL3/IGLV2-8/IGKV1-5/IGHV4-61/TRBC1/C1S/IGKV2-30/C2/IGHV3-49/IGLV2-11/TRBC2/IGLV1-51/IGHV4-59/IGHV3-35/C1R/IGLL1/IGHV3-72/IGHA1/IGHV7-4-1/IGHV3-38/IGHV5-51/IGHV3-53/IGHV4-4/IGHD/IGHG4/IGLV2-23/IGLV1-47/IGHV1-58/IGHV3-13/IGHV1OR15-1/IGHV1-69D/IGKV1D-33/IGKV1D-12/IGHA2/IGHV4-34/IGLV3-27/IGHV5-10-1/IGHV3-21/IGLV6-57/IGKV3-20/IGHV3-66/IGHM/IGLV2-14/IGHV3-64D/IGHV2-70…
GOBP_LAMELLIPODIUM_ORGANIZATION	GOBP_LAMELLIPODIUM_ORGANIZATION	88	0.393429	1.59905	0.00138757	0.0440225	0.0405552	15842	tags=53%, list=28%, signal=39%	HRG/FRMD7/KIT/OCLN/SLIT2/VIL1/ATP7A/PIK3CA/PTPRO/VAV3/SNX2/P2RY12/NCKAP1/ABLIM1/FER/CDH13/CARMIL1/AKIRIN1/WASF2/TWF1/ITGB1/PIK3R1/CYFIP1/ACTR2/DMTN/ABI2/SPATA13/MTOR/AJUBA/SNX1/S1PR1/VAV2/CDC42/GOLPH3/RREB1/ENPP2/ACTR3/AUTS2/KANK1/ARPIN/CCDC88A/WASF1/CORO1C/HDAC4/WASF3/MTSS2/NCK1
GOBP_REGULATION_OF_CELL_SUBSTRATE_JUNCTION_ORGANIZATION	GOBP_REGULATION_OF_CELL_SUBSTRATE_JUNCTION_ORGANIZATION	69	0.438711	1.71104	0.00142539	0.0449987	0.0414545	15627	tags=58%, list=27%, signal=42%	HRG/FMN1/EPB41L5/LIMCH1/SFRP1/SLK/CLASP2/PTPRJ/ARHGAP6/PHLDB2/DUSP3/ROCK1/TEK/KDR/MAPRE2/MACF1/IQGAP1/THBS1/PIK3R1/DMTN/ROCK2/PTEN/BCAS3/NRP1/PTPRA/RHOA/DLC1/LIMS1/PTK2/IQSEC1/SDC4/PEAK1/FAM107A/SMAD3/CLASP1/MYOC/FERMT2/CORO1C/TSC1/WDPCP
GOBP_TRIGLYCERIDE_RICH_LIPOPROTEIN_PARTICLE_REMODELING	GOBP_TRIGLYCERIDE_RICH_LIPOPROTEIN_PARTICLE_REMODELING	14	0.730806	1.95574	0.00145601	0.0457389	0.0421364	439	tags=29%, list=1%, signal=28%	APOA5/APOC3/APOA2/APOA1
GOBP_ETHANOL_METABOLIC_PROCESS	GOBP_ETHANOL_METABOLIC_PROCESS	22	0.625265	1.91094	0.00147109	0.0459858	0.0423639	481	tags=18%, list=1%, signal=18%	ADH1A/ADH4/SULT2A1/ADH1C
GOMF_PROTON_TRANSMEMBRANE_TRANSPORTER_ACTIVITY	GOMF_PROTON_TRANSMEMBRANE_TRANSPORTER_ACTIVITY	124	0.358628	1.48203	0.00150112	0.0466957	0.0430179	10562	tags=31%, list=19%, signal=26%	ATP6V0A4/ATP6V1G3/ATP6V0D2/SLC9A4/ATP6V1B1/SLC9A2/ATP6V1C2/ATP4B/SLC36A2/NNT/ATP6V1A/CLCN5/MTCO2P12/ATP12A/NOX5/SLC39A8/SLC2A13/ATP5F1B/ATP5F1A/CLCN3/SLC2A9/ATP6V1C1/ATP6V1D/SLC17A5/CLCN4/SLC15A2/TMCO3/ATP2C1/NDUFA4/ATP6V1H/ATP6V1B2/ATP5PB/SLC45A2/DMAC2L/COX10/SLC36A1/CYB5A/SLC25A3/SLC9A3
GOMF_ORGANIC_ANION_TRANSMEMBRANE_TRANSPORTER_ACTIVITY	GOMF_ORGANIC_ANION_TRANSMEMBRANE_TRANSPORTER_ACTIVITY	176	0.315173	1.40795	0.00153742	0.0474696	0.0437308	9766	tags=31%, list=17%, signal=25%	SLC26A7/SLC4A1/CFTR/SLC4A9/SLCO1B1/SLC13A2/SLC38A3/SLC16A7/SLC36A2/SLC22A9/SLC26A3/SLC25A21/SLC26A4/SLC4A4/SLC16A11/SLC16A12/SLC22A13/SLC19A2/SLC5A8/SLC2A2/SLC25A5/SLCO4C1/SLCO1A2/SLC25A30/SLC22A2/SLC39A8/SLC5A12/SLC47A1/SLC25A4/SLC7A8/SLC25A24/SLC4A5/SFXN2/SLC1A1/SLC2A9/SLC17A3/MPC1/SLC38A1/SLC25A25/SLC7A9/SLC25A15/SLC35D1/SLC25A13/SLC35B4/ABCG2/SLC4A10/SLC22A12/SLC1A2/OCA2/SLC10A6/SFXN1/SLC35A3…
GOMF_CHLORIDE_TRANSMEMBRANE_TRANSPORTER_ACTIVITY	GOMF_CHLORIDE_TRANSMEMBRANE_TRANSPORTER_ACTIVITY	101	0.389032	1.62647	0.00154088	0.0474696	0.0437308	7126	tags=29%, list=13%, signal=25%	BSND/SLC26A7/CLCNKB/SLC4A1/SLC12A3/CFTR/SLC18A2/GABRA2/SLC6A2/ANO5/CLCNKA/SLC26A3/SLC26A4/GABRB2/ANO4/GABRB3/SLC6A4/CLIC5/CLCN5/SLC12A1/GABRG1/PCYOX1/SLC1A1/CLIC4/CLCN3/SLC12A6/SLC12A2/GLRB/CLCN4
GOCC_PROTON_TRANSPORTING_V_TYPE_ATPASE_V0_DOMAIN	GOCC_PROTON_TRANSPORTING_V_TYPE_ATPASE_V0_DOMAIN	10	0.807577	1.96789	0.00156801	0.0480731	0.0442868	205	tags=20%, list=0%, signal=20%	ATP6V0A4/ATP6V0D2
GOBP_PROTEIN_K63_LINKED_DEUBIQUITINATION	GOBP_PROTEIN_K63_LINKED_DEUBIQUITINATION	35	0.543662	1.84348	0.0015955	0.0484834	0.0446648	13680	tags=54%, list=24%, signal=41%	USP17L2/ABRAXAS1/USP8/ZRANB1/OTUD1/OTUB2/ABRAXAS2/USP25/OTUD7A/USP33/BRCC3/OTUD7B/OTUD4/YOD1/USP16/CYLD/STAMBP/USP27X/USP7
GOBP_GOLGI_TO_PLASMA_MEMBRANE_TRANSPORT	GOBP_GOLGI_TO_PLASMA_MEMBRANE_TRANSPORT	58	0.45007	1.70542	0.0015966	0.0484834	0.0446648	14807	tags=62%, list=26%, signal=46%	ANK3/STXBP6/ARFGEF2/GOLGA7/STEAP2/GOLGA4/EXOC8/SPTBN1/PREPL/EXOC5/LYPLA1/EXOC6B/RABEP1/GOLPH3L/KIF13A/MACF1/ACSL3/BLZF1/EXOC6/GGA2/CNST/EXOC4/RAB10/VAMP3/CCDC93/VPS35L/BBS2/EXOC2/GOLPH3/ARL3/EXOC1/OPTN/NSF/SEC16A/C16orf70/VAMP2
GOBP_LAMELLIPODIUM_ASSEMBLY	GOBP_LAMELLIPODIUM_ASSEMBLY	71	0.441278	1.69915	0.00161895	0.0489291	0.0450754	11680	tags=38%, list=21%, signal=30%	HRG/FRMD7/KIT/OCLN/SLIT2/ATP7A/PIK3CA/PTPRO/VAV3/P2RY12/NCKAP1/ABLIM1/FER/CDH13/CARMIL1/AKIRIN1/WASF2/TWF1/ITGB1/PIK3R1/CYFIP1/ACTR2/DMTN/ABI2/SPATA13/MTOR/AJUBA
GOBP_BILE_ACID_SIGNALING_PATHWAY	GOBP_BILE_ACID_SIGNALING_PATHWAY	12	0.755618	1.93014	0.00163045	0.0490442	0.0451814	10238	tags=58%, list=18%, signal=48%	CYP7A1/SLC10A1/ABCC4/ABCG8/PRKAA1/VDR/DGAT2
GOMF_TRANSLATION_FACTOR_ACTIVITY_RNA_BINDING	GOMF_TRANSLATION_FACTOR_ACTIVITY_RNA_BINDING	84	0.391732	1.58811	0.00171064	0.0510114	0.0469936	16685	tags=52%, list=29%, signal=37%	EIF2S3B/CPEB4/EIF3L/CPEB3/EIF4B/EIF3A/GFM1/GSPT1/CPEB1/EEF1A1/EIF5/EFL1/EIF3C/DHX29/EIF4G2/EIF4E3/HBS1L/EIF1B/ETF1/EIF1AX/EIF4E/EIF2S1/MTIF2/EIF4H/EIF2A/EIF2S3/EIF5A2/GSPT2/GCN1/EEF2/CPEB2/EIF3J/EEF1A1P5/EIF3M/EEF1A2/EIF4A2/AGO2/DENR/EIF3E/EIF3H/ABCF1/EIF4G3/MTRF1L/EEF2K
GOCC_PHAGOCYTIC_VESICLE	GOCC_PHAGOCYTIC_VESICLE	135	0.347728	1.47712	0.00172058	0.0510114	0.0469936	15623	tags=50%, list=27%, signal=36%	ATP6V0A4/ATP6V0D2/RAB11FIP1/RAB39A/ATP7A/MPO/APPL1/CLCN3/STXBP1/TLR1/ITGAV/CYBB/PIK3C3/PIKFYVE/TLR7/RAB14/PIK3R4/MPEG1/RAB11FIP5/LAMP2/ABCA1/APPL2/STX12/KIF5B/BECN1/ANXA3/PIP4P2/SYT11/STXBP4/RAB38/RAB8B/SYT7/RAB10/VAMP3/SYK/MTOR/SNAP23/OCRL/CD36/STXBP3/SEC22B/ATP6V0E2/UVRAG/AMBRA1/RAPGEF1/RAB11A/ATG5/CDC42/RAB23/ZDHHC5/RAB5A/TRIM14/ATP6V0A1/CTSS/ATG14/RAB9A/CDC42EP4/B2M/NCF2/LAMP1/TAP1/RAB43/SCIM…
GOBP_POSITIVE_REGULATION_OF_COAGULATION	GOBP_POSITIVE_REGULATION_OF_COAGULATION	24	0.630312	1.95869	0.00172244	0.0510114	0.0469936	10646	tags=54%, list=19%, signal=44%	HRG/APOH/CPB2/F7/ENPP4/ST3GAL4/HPSE/ANO6/PLG/THBS1/PSEN1/PRDX2/DMTN
GOMF_LIPOPROTEIN_PARTICLE_RECEPTOR_BINDING	GOMF_LIPOPROTEIN_PARTICLE_RECEPTOR_BINDING	28	0.575237	1.8558	0.00172784	0.0510114	0.0469936	439	tags=14%, list=1%, signal=14%	APOA5/APOC3/APOA2/APOA1
GOBP_MEMBRANE_DEPOLARIZATION_DURING_CARDIAC_MUSCLE_CELL_ACTION_POTENTIAL	GOBP_MEMBRANE_DEPOLARIZATION_DURING_CARDIAC_MUSCLE_CELL_ACTION_POTENTIAL	22	0.61649	1.88412	0.00174477	0.0511753	0.0471447	4450	tags=27%, list=8%, signal=25%	MIR208A/HCN2/SCN2B/ANK3/CACNA1D/ANK2
GOCC_PHAGOCYTIC_VESICLE_MEMBRANE	GOCC_PHAGOCYTIC_VESICLE_MEMBRANE	76	0.41124	1.62522	0.00174945	0.0511753	0.0471447	16475	tags=51%, list=29%, signal=36%	ATP6V0A4/ATP6V0D2/RAB11FIP1/RAB39A/ATP7A/TLR1/CYBB/PIK3C3/PIKFYVE/PIK3R4/LAMP2/APPL2/ANXA3/PIP4P2/RAB38/RAB8B/SYT7/RAB10/VAMP3/SNAP23/OCRL/SEC22B/ATP6V0E2/RAPGEF1/ATG5/RAB23/RAB5A/ATP6V0A1/RAB9A/B2M/LAMP1/TAP1/RAB43/RAB9B/ATP6V0A2/ATP6V0D1/ATP6V0B/RAB8A/RAB7A
GOBP_HEPATICOBILIARY_SYSTEM_DEVELOPMENT	GOBP_HEPATICOBILIARY_SYSTEM_DEVELOPMENT	140	0.354364	1.51391	0.0017594	0.0512314	0.0471964	11135	tags=35%, list=20%, signal=28%	BAAT/FGL1/OTC/CPB2/ARG1/CPS1/PTPN3/CYP1A1/PCK1/ALDH1A2/MAN2A1/ATP7A/PDX1/GNPNAT1/HMGCS1/COBL/PIK3CA/PRMT5/CCND1/IGF2R/CUL3/NF1/ARID5B/MED1/CPT1A/ITGA2/EGFR/WDR35/PTCH1/NOTCH2/PKD2/HNF1A/UGT1A1/CEACAM1/TGFBR3/ZMPSTE24/CITED2/KRAS/MET/PTCD2/NIPBL/RGN/ZIC3/RB1CC1/SP3/AK4/SEC63/TYMS/FGF1
GOBP_ORGANOPHOSPHATE_ESTER_TRANSPORT	GOBP_ORGANOPHOSPHATE_ESTER_TRANSPORT	132	0.34827	1.46319	0.00179201	0.051944	0.0478528	7095	tags=21%, list=12%, signal=19%	APOA5/SLC4A1/APOC3/APOA2/APOA1/TMEM30B/ABCC4/ANO4/TNFAIP8L3/G6PC/TRPC5/SLC25A5/ATP11A/ATP8A1/ATP10D/ATP8B4/ABCG8/OSBPL8/SLC25A4/ATP9A/SLC25A24/ABCB1/CERT1/SLC17A3/EPG5/ATP11C/ATP11B/SLC25A25
GOBP_LIPOPROTEIN_BIOSYNTHETIC_PROCESS	GOBP_LIPOPROTEIN_BIOSYNTHETIC_PROCESS	92	0.387286	1.59247	0.00182485	0.0525781	0.0484369	11406	tags=35%, list=20%, signal=28%	HHATL/APOA1/CWH43/ZDHHC23/ZDHHC15/ZDHHC2/HHAT/GOLGA7/PGAP4/PPM1A/RAB3GAP2/ZDHHC3/SVIP/PGAP1/PIGO/PIK3C3/RABL3/PIGH/GPLD1/ZDHHC21/ZDHHC9/ZDHHC4/PIGN/NMT2/PIGS/MPPE1/PIGK/PIGB/RAB3GAP1/PIGA/PIGF/PIGV
GOMF_ALCOHOL_BINDING	GOMF_ALCOHOL_BINDING	86	0.403639	1.63393	0.00183038	0.0525781	0.0484369	5251	tags=19%, list=9%, signal=17%	APOA5/ADH4/APOC3/APOA2/APOA1/APOF/TRPC5/ITPR2/PLCL1/PLCL2/PROM1/ASTN2/OSBPL1A/GRAMD1C/OSBPL8/ERLIN2
GOMF_PDZ_DOMAIN_BINDING	GOMF_PDZ_DOMAIN_BINDING	83	0.401406	1.62722	0.00184613	0.0527927	0.0486346	11968	tags=52%, list=21%, signal=41%	CFTR/ADRB1/GRID2/SLC34A1/GRIK5/ATP2B2/SHISA6/LNX2/PDZK1/PRKN/SHISA9/SNTB1/GNG12/CLCN3/LNX1/KIDINS220/PLEKHA2/CRIM1/NLGN1/RAPGEF2/ERC1/TGFBR3/SLC22A12/FZD1/LIN7C/ARHGAP29/ACOX1/CIT/ACVR2A/DOCK4/SDC2/PSEN1/FZD4/CXXC4/SLC9A3/EXOC4/LPAR1/FZD3/CXADR/SLC22A4/PLEKHA1/PTEN/ADAM17
GOBP_PORPHYRIN_CONTAINING_COMPOUND_METABOLIC_PROCESS	GOBP_PORPHYRIN_CONTAINING_COMPOUND_METABOLIC_PROCESS	40	0.503361	1.72545	0.00191965	0.0545352	0.0502399	10200	tags=35%, list=18%, signal=29%	CYP1A2/AMBP/HPX/CYP1A1/IREB2/SUCLA2/UGT1A4/FECH/IBA57/ALAS1/UGT1A1/PGRMC1/NFE2L1/COX10
GOBP_HISTONE_UBIQUITINATION	GOBP_HISTONE_UBIQUITINATION	47	0.494714	1.77672	0.00192417	0.0545352	0.0502399	15222	tags=60%, list=27%, signal=44%	UBE2U/RAG1/PCGF5/USP22/CDC73/CTR9/RNF20/TRIP12/HUWE1/UBR5/OTUB2/DDB1/WAC/UBE2E1/BCOR/CUL4B/UBR2/RYBP/RNF40/TRIM37/DTX3L/PHC1/SKP1/BMI1/LEO1/RNF2/UBE2B/RNF8
GOBP_ALPHA_AMINO_ACID_BIOSYNTHETIC_PROCESS	GOBP_ALPHA_AMINO_ACID_BIOSYNTHETIC_PROCESS	67	0.431707	1.66749	0.00193966	0.0547312	0.0504204	14279	tags=51%, list=25%, signal=38%	OTC/AGXT/PAH/CPS1/DHFRP1/AGXT2/GOT1/GLUD2/BHMT/SHMT1/SERINC5/AASDHPPT/MTHFD1/DHFR/CTH/DHFR2/MTRR/GLUD1/MTR/GOT2/GLS/SEPHS2/NAGS/OAT/SLC25A12/ATP2B4/ILVBL/MTAP/SERINC3/PSPH/ENOPH1/APIP/ASNSD1/PHGDH
GOBP_CHOLESTEROL_EFFLUX	GOBP_CHOLESTEROL_EFFLUX	61	0.45061	1.72983	0.00199244	0.0559727	0.0515642	9422	tags=30%, list=17%, signal=25%	APOA5/APOC3/APOA2/APOA1/PON1/CES1/EGF/ABCG8/ABCA8/MIR26A1/MIR128-1/TTC39B/PTCH1/SIRT1/ABCA1/STX12/SREBF2/MIR148A
GOBP_CYTOLYSIS	GOBP_CYTOLYSIS	31	0.564744	1.86347	0.00200648	0.0561199	0.0516998	200	tags=16%, list=0%, signal=16%	CFHR5/HRG/CFHR2/C8B/C8A
GOBP_AUTOPHAGY_OF_MITOCHONDRION	GOBP_AUTOPHAGY_OF_MITOCHONDRION	75	0.422599	1.65805	0.00206746	0.0575729	0.0530384	16104	tags=52%, list=28%, signal=37%	PPARGC1A/CTSK/VPS13D/GABARAPL1/SPATA18/PRKN/FZD5/VPS13C/PINK1/HUWE1/ATG9A/MFN2/SREBF2/MUL1/BECN1/HTT/ATG2B/BNIP3L/RB1CC1/FBXO7/USP30/RNF41/VDAC1/AMBRA1/ATG5/HIF1A/GBA/OPTN/WIPI1/ATG14/GABARAPL2/CSNK2A2/SQSTM1/ATG7/HK2/MAP1LC3B/BNIP3/ATG3/FUNDC2
GOMF_SODIUM_CHLORIDE_SYMPORTER_ACTIVITY	GOMF_SODIUM_CHLORIDE_SYMPORTER_ACTIVITY	11	0.792765	1.9871	0.0020887	0.0579114	0.0533502	6523	tags=55%, list=11%, signal=48%	SLC12A3/SLC18A2/SLC6A2/SLC6A4/SLC12A1/SLC12A2
GOMF_PHOSPHATIDYLINOSITOL_BISPHOSPHATE_PHOSPHATASE_ACTIVITY	GOMF_PHOSPHATIDYLINOSITOL_BISPHOSPHATE_PHOSPHATASE_ACTIVITY	23	0.622695	1.91248	0.00211866	0.0584878	0.0538812	13641	tags=61%, list=24%, signal=46%	INPP5J/MTM1/MTMR6/PIKFYVE/SYNJ1/PIP4P2/MTMR2/INPP4B/MTMR8/OCRL/PTEN/MTMR1/INPP4A/FIG4
GOBP_EPIDERMIS_DEVELOPMENT	GOBP_EPIDERMIS_DEVELOPMENT	462	-0.412561	-1.2882	0.0022014	0.0605101	0.0557443	15790	tags=35%, list=28%, signal=25%	KRT18/ZBED2/PTCH2/SOX21/KRTAP19-8/KRTAP4-8/HOXC13/LAMB3/PDZD7/KRTAP26-1/SFRP4/KRT72/CTSV/KRTAP19-1/KRTAP29-1/KRTAP4-2/PKP1/KRTAP13-3/KRTAP23-1/KRTAP4-11/KRT28/KRTAP13-2/KRT19/KRT25/KRTAP10-2/KRT39/KRTAP5-10/KRTAP12-4/LCE2B/POU3F1/LCE2D/KRTAP10-9/TGM3/KRTAP4-4/FOXN1/POU3F2/DNASE1L2/KRTDAP/KRTAP4-6/LCE2C/KRT31/KRTAP10-7/PITX2/OVOL3/GJB5/FGF10/PKP3/KRT82/KLK5/CELA2A/FST/KRTAP5-5/KRTAP10-3/WNT10A/KRT…
GOBP_STRESS_GRANULE_ASSEMBLY	GOBP_STRESS_GRANULE_ASSEMBLY	23	0.622248	1.9111	0.00221128	0.0605206	0.0557539	14778	tags=57%, list=26%, signal=42%	PRKAA2/MAPT/G3BP2/DDX3X/CSDE1/PRKAA1/DYNC1H1/DDX6/EIF2S1/PUM2/G3BP1/LSM14A/PRRC2C
GOCC_RUFFLE	GOCC_RUFFLE	175	0.327671	1.49565	0.00222459	0.0606249	0.05585	13618	tags=42%, list=24%, signal=32%	PLA2G4F/INPP5J/AMOT/EPB41L5/VIL1/MKLN1/AIF1L/KSR1/TRPM7/COBL/APPL1/EPS8/TLN2/APC/MTM1/CDKL5/CD2AP/CLCN3/FGD4/ITGAV/MYO6/ARHGAP18/CLASP2/NCKAP1/MTMR6/PTPRJ/TLR4/RASA1/ROCK1/LIMA1/EEF1A1/FERMT1/ACAP2/DIAPH1/MTSS1/MYO5A/ATP6V1B2/MACF1/PODXL/IQGAP1/MYO10/APPL2/MTMR9/ALS2/TIRAP/SH3YL1/WASF2/TWF1/ITGB1/CDK6/CYFIP1/PSD3/DDX58/SPATA13/WWC1/FRMD4B/IFIT5/KLHL2/C2CD5/PLEKHA1/PACSIN2/FGD5/EZR/ADAM17/JCAD/CLI…
GOBP_ORGANIC_HYDROXY_COMPOUND_CATABOLIC_PROCESS	GOBP_ORGANIC_HYDROXY_COMPOUND_CATABOLIC_PROCESS	77	0.419567	1.66681	0.00225378	0.0611589	0.056342	6128	tags=22%, list=11%, signal=20%	ADH4/SULT2A1/CYP7A1/INPP5J/CEL/HAO1/AKR1D1/HSD17B6/LDHD/IMPA2/ALDH1B1/GK/NTSR1/SORD/SULT1C4/CYP39A1/GPD2
GOBP_PHOSPHATIDYLINOSITOL_3_PHOSPHATE_BIOSYNTHETIC_PROCESS	GOBP_PHOSPHATIDYLINOSITOL_3_PHOSPHATE_BIOSYNTHETIC_PROCESS	14	0.718818	1.92366	0.00227156	0.0613802	0.0565458	13641	tags=79%, list=24%, signal=60%	PIK3C2G/PIK3C2A/PIK3CA/PIK3CB/PIK3C3/PIKFYVE/ATM/INPP4B/PIK3R3/INPP4A/FIG4
GOBP_RENAL_SYSTEM_PROCESS	GOBP_RENAL_SYSTEM_PROCESS	118	0.355965	1.46942	0.00231132	0.0621912	0.0572929	8604	tags=31%, list=15%, signal=27%	SLC4A1/ATP6V1B1/TRPV5/CHRNB4/NPR3/HSD11B2/AVPR1A/AQP4/MYO5B/KLHL3/SPX/TFAP2B/ADCY2/ADCY1/BCL2/SUCNR1/AKAP11/F2RL1/SLC4A5/PTPRO/ADGRF5/RAB11FIP2/BTC/ADCY9/TBC1D8B/PRKACB/CYP4A11/PRKAR2A/SLC15A2/AQP2/EDNRB/ADCY5/AGTR2/LGMN/HNF1A/KCNMA1/PRKAR1A
GOBP_VESICLE_MEDIATED_TRANSPORT_TO_THE_PLASMA_MEMBRANE	GOBP_VESICLE_MEDIATED_TRANSPORT_TO_THE_PLASMA_MEMBRANE	92	0.381156	1.56727	0.00233034	0.0624395	0.0575216	16475	tags=60%, list=29%, signal=43%	ANK3/STXBP6/ZDHHC2/ARFGEF2/GOLGA7/STEAP2/SLC1A1/GOLGA4/EXOC8/SPTBN1/PREPL/EXOC5/LYPLA1/VPS26C/EXOC6B/VPS35/RABEP1/GOLPH3L/VPS26A/KIF13A/MACF1/STX3/ACSL3/BLZF1/EXOC6/GGA2/SNX27/CNST/ANKRD50/EXOC4/RAB10/VAMP3/CLSTN1/CCDC93/VPS35L/BBS2/EXOC2/ANKRD27/RAB11A/GOLPH3/ARL3/EXOC1/GRIP1/OPTN/NSF/SEC16A/C16orf70/VAMP2/WASHC2C/GOPC/LLGL1/RAB8A/VPS39/SYS1/RAB7A
GOCC_PROTEIN_LIPID_COMPLEX	GOCC_PROTEIN_LIPID_COMPLEX	39	0.508509	1.73505	0.00239201	0.0634675	0.0584686	510	tags=18%, list=1%, signal=18%	APOA5/APOC3/APOA2/APOH/APOA1/APOF/PON1
GOBP_REGULATION_OF_FIBRINOLYSIS	GOBP_REGULATION_OF_FIBRINOLYSIS	14	0.718387	1.9225	0.00239434	0.0634675	0.0584686	3449	tags=29%, list=6%, signal=27%	HRG/APOH/CPB2/F11
GOBP_HISTONE_EXCHANGE	GOBP_HISTONE_EXCHANGE	58	0.437387	1.65736	0.00241468	0.0634675	0.0584686	2059	tags=10%, list=4%, signal=10%	H4C3/H4C6/H4C2/H4C4/H4C13/H4C1
GOBP_FC_RECEPTOR_MEDIATED_STIMULATORY_SIGNALING_PATHWAY	GOBP_FC_RECEPTOR_MEDIATED_STIMULATORY_SIGNALING_PATHWAY	143	-0.478073	-1.43577	0.00242516	0.0634675	0.0584686	9529	tags=28%, list=17%, signal=23%	IGHV3-53/IGHG4/IGLV2-23/IGLV1-47/IGHV3-13/IGHV1OR15-1/IGKV1D-33/IGKV1D-12/IGHV4-34/IGLV3-27/IGLV6-57/IGKV3-20/IGLV2-14/IGHV2-70/IGKV2D-28/IGLC6/IGHV4-39/IGKV1-12/IGKV3D-20/IGLC2/IGHG3/IGKV3D-11/IGHG1/IGHV3-33/BLK/IGLV1-44/IGKV1-16/IGLV1-40/IGHG2/IGKV1-17/IGKC/IGLC7/IGHV1-69/IGKV2-40/IGHV3-30/IGKV2-29/IGKV3-15/IGLC3/IGKV2-28/IGKV5-2
GOBP_CELLULAR_GLUCURONIDATION	GOBP_CELLULAR_GLUCURONIDATION	19	0.688576	2.01499	0.00242818	0.0634675	0.0584686	11026	tags=63%, list=19%, signal=51%	UGT2B15/UGT2B4/UGT2B28/UGT2A3/UGT1A9/UGT1A4/PRKCE/UGT1A6/UGT1A1/UGT2B7/UGT2A1/ABHD10
GOBP_PHOSPHOLIPID_TRANSPORT	GOBP_PHOSPHOLIPID_TRANSPORT	94	0.386399	1.5807	0.00242842	0.0634675	0.0584686	6787	tags=21%, list=12%, signal=19%	APOA5/SLC4A1/APOC3/APOA2/APOA1/TMEM30B/ANO4/TNFAIP8L3/TRPC5/ATP11A/ATP8A1/ATP10D/ATP8B4/ABCG8/OSBPL8/ATP9A/ABCB1/CERT1/ATP11C/ATP11B
GOBP_ORGANIC_ACID_TRANSMEMBRANE_TRANSPORT	GOBP_ORGANIC_ACID_TRANSMEMBRANE_TRANSPORT	153	0.337346	1.48795	0.00244042	0.0635206	0.0585176	7998	tags=27%, list=14%, signal=23%	SLC38A8/SLC13A2/SLC6A15/THRSP/SLC38A3/SLC16A7/SLC36A2/SLC7A13/LRP2/SLC25A21/PRKAA2/SLC16A11/GRM1/SLC38A4/SLC6A19/SLC5A8/ACSL1/ACE2/SLC25A30/SLC22A2/SLC16A10/SLC5A12/SLC47A1/NTSR1/SLC7A8/SLC6A18/SFXN2/ABCB1/SLC1A1/CPT2/MPC1/SLC38A1/KCNJ10/ABCD3/CPT1A/SLC7A9/PRKAG2/PRKAB2/CLN8/SLC25A15/SLC25A13
GOBP_VACUOLAR_ACIDIFICATION	GOBP_VACUOLAR_ACIDIFICATION	23	0.617966	1.89795	0.00248981	0.0645429	0.0594594	8482	tags=30%, list=15%, signal=26%	ATP6V0A4/ATP6V0D2/DMXL1/CLIC4/ATP6AP2/DMXL2/ATP6V1H
GOBP_REGULATION_OF_CHOLESTEROL_ESTERIFICATION	GOBP_REGULATION_OF_CHOLESTEROL_ESTERIFICATION	13	0.753029	1.97149	0.00250568	0.0646911	0.0595959	439	tags=23%, list=1%, signal=23%	APOA5/APOA2/APOA1
GOCC_CLATHRIN_COATED_VESICLE	GOCC_CLATHRIN_COATED_VESICLE	190	0.303664	1.39933	0.00252847	0.0649372	0.0598226	11576	tags=37%, list=20%, signal=30%	SFTPB/CFTR/ASTN1/SLC18A2/SH3GL2/SFTPC/TYRP1/LRP2/EGF/CPNE6/EPN3/SLC2A4/SYT9/ASTN2/CLVS2/ATP7A/PIK3C2A/HSPA8/FZD5/STEAP2/SCAMP1/IGF2R/BTC/M6PR/TGOLN2/MYO6/SH3BP4/FCHO2/CD207/DENND1B/CLTC/AFTPH/VPS41/EGFR/AP1G1/GPR107/TBC1D5/CLINT1/RAB14/ADRB2/RASSF9/EPN2/NCALD/BTBD8/CD9/AP2B1/SNX18/SYNRG/AP3B1/DAB2/ADAM10/DENND1A/SCARB2/TGFA/PICALM/SYT11/GGA2/AAK1/TMED10/FZD4/RAB8B/SYT2/RAB3A/SORT1/VAMP3/DENND1C/N…
GOMF_MODIFIED_AMINO_ACID_BINDING	GOMF_MODIFIED_AMINO_ACID_BINDING	93	0.384481	1.56571	0.00254273	0.0649372	0.0598226	12520	tags=42%, list=22%, signal=33%	SYT10/TRIM72/GPR143/HAVCR1/GNMT/CPS1/CPNE6/SCIN/FOLR3/GSDMC/SYT9/MMUT/RS1/DHFRP1/OSBPL8/LANCL1/APPL1/HSPA8/FCHO2/FTCDNL1/SYT17/DPEP1/CAVIN2/MME/APPL2/THBS1/DHFR/MTHFS/SCARB2/SYT11/ANXA13/SYT7/SYT2/TYMS/OSBPL10/ANXA9/SLC46A1/NOX4/MMACHC
GOBP_NUCLEOSIDE_DIPHOSPHATE_METABOLIC_PROCESS	GOBP_NUCLEOSIDE_DIPHOSPHATE_METABOLIC_PROCESS	154	0.337479	1.48074	0.00254576	0.0649372	0.0598226	14389	tags=47%, list=25%, signal=35%	SLC4A1/PPARGC1A/OGDHL/PFKFB2/ZBTB20/PRKAA2/DLG2/SLC4A4/AK5/ESRRB/PFKM/MAGI3/ENTPD5/PPARA/FBP1/PKLR/OGDH/AK7/NUDT7/RANBP2/NUP160/NUP133/PRKAG2/NUP153/POM121/NUP205/PRKAA1/AK3/PGK1/EP300/BPGM/NUP155/PGAM1/NDC1/DHTKD1/NCOR1/NME7/NUP58/TPR/P2RX7/DLG1/ALDOB/NUP98/PSEN1/APP/AK4/NME6/SEH1L/ARNT/AK9/CASK/CMPK2/PGM1/NUP54/TJP2/ENO4/PFKP/FOXK1/PGM2L1/IGF1/ENTPD7/NUP88/CMPK1/PRKAG1/ENO3/HIF1A/NUDT16/NUDT9/P…
GOBP_ORGANOPHOSPHATE_CATABOLIC_PROCESS	GOBP_ORGANOPHOSPHATE_CATABOLIC_PROCESS	153	0.33546	1.47963	0.00268621	0.0682223	0.062849	14384	tags=39%, list=25%, signal=29%	APOA2/PON1/PLA2G4F/INPP5J/PLCG2/GPD1L/ACAT1/GDA/ANGPTL3/NUDT12/IMPA2/ENTPD5/FITM2/NT5C1B/NTSR1/NUDT4B/PNPLA8/NAPEPLD/ABHD6/NUDT7/LIPC/AMPD3/PDE4D/PLA2G4A/NT5C2/PGM2/SYNJ1/SMPDL3A/NT5C1A/PDE7B/GDE1/BPNT1/PLA2G7/ENPP1/MTMR2/ENPP6/DPYD/OCRL/DCTPP1/MLYCD/PTEN/UPB1/SARM1/INPP5F/IMPA1/ENPP3/LDLR/PRKCD/ENTPD7/NUDT4/UNG/ENPP7/DPYS/PDE1A/NUDT16/NUDT9/ENPP2/NUDT15/NEIL2/PDE8A
GOBP_CHLORIDE_TRANSPORT	GOBP_CHLORIDE_TRANSPORT	109	0.355881	1.47665	0.00269594	0.0682223	0.062849	7126	tags=27%, list=13%, signal=23%	BSND/SLC26A7/CLCNKB/SLC4A1/SLC12A3/CFTR/GABRA2/ANO5/CASR/CLCNKA/SLC26A3/SLC26A4/GABRB2/ANO4/GABRB3/CLIC5/CLCN5/SLC12A1/GABRG1/PCYOX1/PRKG2/ABCB1/SLC1A1/CLIC4/CLCN3/SLC12A6/SLC12A2/GLRB/CLCN4
GOBP_LIPID_HOMEOSTASIS	GOBP_LIPID_HOMEOSTASIS	159	0.330273	1.46213	0.00271548	0.068445	0.0630542	10238	tags=30%, list=18%, signal=25%	MIR208A/APOA5/APOC3/APOA2/APOA1/CYP7A1/CES1/ABCB11/ZBTB20/PRKAA2/G6PC/ANGPTL3/FITM2/ABCG8/AKR1C1/CYP7B1/GOT1/NR1D2/CYP39A1/PNPLA8/CERT1/RORA/MIR128-1/LIPC/EPHX2/ACSM3/TLCD4/TTC39B/LIMA1/CLN8/DDX3X/SIRT1/PRKAA1/INSIG1/GPAM/NUS1/ABCA1/PNPLA4/MIR30C1/SREBF2/MIR590/MIR148A/MIR185/TMEM97/ACOX2/ACOX1/LRP5/DGAT2
GOBP_DNA_REPLICATION_INDEPENDENT_NUCLEOSOME_ORGANIZATION	GOBP_DNA_REPLICATION_INDEPENDENT_NUCLEOSOME_ORGANIZATION	54	0.471883	1.7578	0.00275179	0.0690872	0.0636458	2059	tags=11%, list=4%, signal=11%	H4C3/H4C6/H4C2/H4C4/H4C13/H4C1
GOBP_FOCAL_ADHESION_ASSEMBLY	GOBP_FOCAL_ADHESION_ASSEMBLY	85	0.377182	1.52478	0.00277582	0.0693227	0.0638627	15627	tags=52%, list=27%, signal=38%	HRG/FMN1/EPB41L5/LIMCH1/BCL2/SFRP1/SLK/PTPRK/CLASP2/PTPRJ/ITGA2/ARHGAP6/PHLDB2/DUSP3/ROCK1/TEK/KDR/PDPK1/MACF1/IQGAP1/THBS1/DMTN/ROCK2/AJUBA/PTEN/BCAS3/NRP1/PTPRA/RHOA/DLC1/LIMS1/SORBS1/PTK2/SDC4/PEAK1/FAM107A/SMAD3/CLASP1/MYOC/FERMT2/BCR/CORO1C/TSC1/WDPCP
GOBP_TRIGLYCERIDE_METABOLIC_PROCESS	GOBP_TRIGLYCERIDE_METABOLIC_PROCESS	107	0.357343	1.49487	0.00278291	0.0693227	0.0638627	9233	tags=29%, list=16%, signal=24%	APOA5/APOC3/APOA2/APOH/APOA1/THRSP/AADAC/GPAT3/CPS1/SORL1/G6PC/ACSL1/PCK1/CAT/MOGAT1/FITM2/FABP1/GK/LIPC/DDHD2/CPT1A/SEL1L/PTPN11/SIRT1/INSIG1/GPAM/GPLD1/AGMO/LPIN2/PNPLA4/MIR30C1
GOBP_NEGATIVE_REGULATION_OF_RESPONSE_TO_WOUNDING	GOBP_NEGATIVE_REGULATION_OF_RESPONSE_TO_WOUNDING	89	0.402137	1.65344	0.00286394	0.0710636	0.0654665	9308	tags=27%, list=16%, signal=23%	HRG/APOH/VTN/KNG1/CPB2/MIR1298/MIR15B/CLDN19/PROC/F11/ADTRP/EPHA4/AJAP1/CERS2/SLC12A2/CLASP2/TNR/PHLDB2/KREMEN1/CD9/CEACAM1/PLG/THBS1/FGF2
GOMF_LIPID_TRANSPORTER_ACTIVITY	GOMF_LIPID_TRANSPORTER_ACTIVITY	162	0.319943	1.40746	0.00290944	0.071231	0.0656207	12174	tags=39%, list=21%, signal=31%	APOA2/APOA1/APOF/SLCO1B1/SLC10A1/SLC22A9/AKR1C4/CFHR4/SLC10A2/TTPA/TMEM30B/ABCB11/TNFAIP8L3/SLC27A2/SLC5A8/ATP11A/OSBPL1A/SLCO1A2/ATP8A1/ATP10D/FABP1/ATP8B4/GRAMD1C/ABCG8/ABCA8/OSBPL8/ATP9A/ABCB1/CERT1/SLC1A1/SLC10A5/OSBP/ATP11C/ABCD3/ATP11B/SLC51B/SLC25A13/ANO6/CEACAM1/ABCA1/OSBPL11/SLC1A2/SLC10A6/TMEM30A/ATP9B/ATG2B/ABCA12/PRELID3B/RBP4/PRELID2/SLC1A3/PLSCR4/SLC25A12/OSBPL10/SLCO2A1/SLC10A7/CD3…
GOBP_ADIPOSE_TISSUE_DEVELOPMENT	GOBP_ADIPOSE_TISSUE_DEVELOPMENT	38	0.517989	1.74563	0.0029245	0.071231	0.0656207	11223	tags=53%, list=20%, signal=42%	OXCT1/PPARGC1A/CASR/SORL1/PIK3CA/ARID5B/RORC/SLC25A25/SPTLC2/SIRT1/KLF7/SPART/SH3PXD2B/LRP5/DGAT2/PAXIP1/AMER1/ZNF516/PGRMC2/ATF2
GOMF_WATER_TRANSMEMBRANE_TRANSPORTER_ACTIVITY	GOMF_WATER_TRANSMEMBRANE_TRANSPORTER_ACTIVITY	14	0.712925	1.90789	0.00292641	0.071231	0.0656207	4089	tags=36%, list=7%, signal=33%	AQP6/AQP5/AQP10/AQP4/SLC5A1
GOBP_KILLING_OF_CELLS_IN_OTHER_ORGANISM_INVOLVED_IN_SYMBIOTIC_INTERACTION	GOBP_KILLING_OF_CELLS_IN_OTHER_ORGANISM_INVOLVED_IN_SYMBIOTIC_INTERACTION	26	0.56047	1.77376	0.00292654	0.071231	0.0656207	3125	tags=27%, list=5%, signal=25%	CFHR5/HRG/CFHR2/DEFA1/ARG1/CFHR1/REG3G
GOBP_STEROID_CATABOLIC_PROCESS	GOBP_STEROID_CATABOLIC_PROCESS	26	0.561239	1.77619	0.00292654	0.071231	0.0656207	1962	tags=23%, list=3%, signal=22%	CYP1A2/CYP7A1/CEL/CYP3A4/AKR1D1/HSD17B6
GOBP_IMMUNE_RESPONSE_TO_TUMOR_CELL	GOBP_IMMUNE_RESPONSE_TO_TUMOR_CELL	21	0.600711	1.79631	0.0030182	0.0731826	0.0674187	9980	tags=38%, list=18%, signal=31%	HRG/SLC22A13/IL12B/HAVCR2/CEACAM1/MR1/HSPD1/FBXO38
GOBP_INTESTINAL_ABSORPTION	GOBP_INTESTINAL_ABSORPTION	39	0.498591	1.70121	0.00309662	0.0747998	0.0689084	5465	tags=31%, list=10%, signal=28%	APOA5/APOA1/CEL/PLS1/SLC2A2/SLC5A1/VIL1/FABP1/IREB2/ABCG8/AKR1C1/LPCAT3
GOBP_PEPTIDYL_METHIONINE_MODIFICATION	GOBP_PEPTIDYL_METHIONINE_MODIFICATION	13	0.746881	1.95539	0.00312723	0.0750006	0.0690934	10992	tags=54%, list=19%, signal=43%	APOA2/APOA1/NAA30/NAA35/NAA15/METAP1/METAP2
GOBP_INTRACELLULAR_LIPID_TRANSPORT	GOBP_INTRACELLULAR_LIPID_TRANSPORT	46	0.490159	1.7367	0.00312846	0.0750006	0.0690934	14294	tags=61%, list=25%, signal=46%	THRSP/CES1/PRKAA2/CERT1/LRP6/CPT2/OSBP/ABCD3/CPT1A/PRKAG2/PRKAB2/SGPP1/NUS1/ABCA1/SCP2/ACACB/SYT7/RELCH/SERAC1/ABCG1/FABP3/NPC1/PLEKHA8/ACACA/LDLR/STARD4/PCSK9/PIP4K2A
GOBP_SERINE_FAMILY_AMINO_ACID_METABOLIC_PROCESS	GOBP_SERINE_FAMILY_AMINO_ACID_METABOLIC_PROCESS	43	0.482437	1.69656	0.00315052	0.0752467	0.0693201	13629	tags=49%, list=24%, signal=37%	BAAT/AGXT/DHFRP1/AGXT2/GCLC/SHMT1/SEPSECS/SERINC5/MTHFD1/DHFR/CTH/GLYAT/GCLM/DHFR2/SEPHS2/GLDC/CDO1/SERINC3/PSPH/DAO/GART
GOMF_PEROXISOME_PROLIFERATOR_ACTIVATED_RECEPTOR_BINDING	GOMF_PEROXISOME_PROLIFERATOR_ACTIVATED_RECEPTOR_BINDING	12	0.732274	1.87051	0.00323911	0.077074	0.0710035	6710	tags=50%, list=12%, signal=44%	NR0B2/PPARGC1A/ASXL3/ASXL2/TACC1/MED1
GOBP_CELLULAR_RESPONSE_TO_KETONE	GOBP_CELLULAR_RESPONSE_TO_KETONE	92	0.37488	1.54146	0.00326246	0.0773409	0.0712494	13303	tags=43%, list=23%, signal=33%	DEFB104B/CFTR/CRH/ARG1/PRKAA2/DEFB104A/PCK1/ADCY2/AR/NCOA4/ADCY1/SFRP1/USP8/FECH/PRKCE/DCPS/KLF9/EGFR/ADCY5/SIRT1/AGTR2/PRKAA1/FOXO1/XRN1/SGK1/NR3C1/EIF4E/CDC5L/ROCK2/AKR1C2/LARP1/FDX1/ADCY6/PPARG/PCK2/ACACA/KLF4/AQP1/GNB1/CDK4
GOBP_CELL_COMMUNICATION_INVOLVED_IN_CARDIAC_CONDUCTION	GOBP_CELL_COMMUNICATION_INVOLVED_IN_CARDIAC_CONDUCTION	57	0.449033	1.68564	0.00329154	0.0777413	0.0716183	8549	tags=26%, list=15%, signal=22%	MIR208A/KCNE5/DSG2/ATP1A1/DSP/CACNA1D/ANK2/KCNJ3/DSC2/ATP1B1/PKP2/CTNNA3/PDE4D/NUP155/CAMK2D
GOCC_CORTICAL_CYTOSKELETON	GOCC_CORTICAL_CYTOSKELETON	104	0.365577	1.52127	0.00335388	0.0789214	0.0727054	12768	tags=38%, list=22%, signal=30%	PVALB/SLC4A1/RIMS1/MYRIP/MYZAP/CALB1/PLS1/SPTBN2/SHROOM3/BSN/PCLO/DCDC2/RDX/CDH1/PPP1R9A/COBL/CAPZA2/SPTBN1/WASL/GYS2/UTRN/ERC1/EEF1A1/SHROOM4/CDH2/CIB2/SHROOM2/ACTR2/DMTN/AKAP13/EPB41L2/EPB41/EZR/TMOD1/SPTAN1/MED28/RIMS2/LANCL2/CAPN2/TRPV4
GOBP_B_CELL_RECEPTOR_SIGNALING_PATHWAY	GOBP_B_CELL_RECEPTOR_SIGNALING_PATHWAY	123	-0.488165	-1.45097	0.00342422	0.0799872	0.0736873	12118	tags=40%, list=21%, signal=31%	IGHV4-59/IGHV3-35/LIME1/IGLL1/MS4A1/IGHV3-72/IGHA1/IGHV7-4-1/IGHV3-38/IGHV5-51/IGHV3-53/IGHV4-4/IGHD/IGHG4/IGHV1-58/IGHV3-13/IGHV1OR15-1/IGHV1-69D/IGHA2/IGHV4-34/IGHV5-10-1/IGHV3-21/IGHV3-66/IGHM/IGHV3-64D/IGHV2-70/IGLC6/IGHV4-39/PAX5/IGLC2/IGHV1-18/IGHG3/CD79A/IGHG1/IGHV3-33/BLK/IGHG2/IGKC/IGLC7/IGHV1-69/IGHV6-1/CD19/IGLL5/IGHV3-64/IGHV1-69-2/IGHV3-30/IGHV1-24/IGLC3/IGHV3-73
GOCC_TRIGLYCERIDE_RICH_PLASMA_LIPOPROTEIN_PARTICLE	GOCC_TRIGLYCERIDE_RICH_PLASMA_LIPOPROTEIN_PARTICLE	20	0.636405	1.8739	0.00343225	0.0799872	0.0736873	439	tags=25%, list=1%, signal=25%	APOA5/APOC3/APOA2/APOH/APOA1
GOBP_REGULATION_OF_FATTY_ACID_METABOLIC_PROCESS	GOBP_REGULATION_OF_FATTY_ACID_METABOLIC_PROCESS	97	0.370422	1.52928	0.0034526	0.0799872	0.0736873	10310	tags=37%, list=18%, signal=30%	APOA5/APOC3/APOA1/CYP7A1/PLA2G3/PPARGC1A/ABCB11/AVPR1A/PRKAA2/PDK4/MIR204/SLC22A13/FABP1/ERLIN2/PPARA/PDP1/PDP2/CPT1A/PDK2/GHSR/PRKAG2/IRS1/PDK1/PRKAB2/SIRT1/INSIG1/CEACAM1/PDK3/APPL2/LONP2/NCOR1/MIR30C1/ACADL/RGN/DGAT2/ACACB
GOMF_PHOSPHATIDYLINOSITOL_MONOPHOSPHATE_PHOSPHATASE_ACTIVITY	GOMF_PHOSPHATIDYLINOSITOL_MONOPHOSPHATE_PHOSPHATASE_ACTIVITY	17	0.700085	1.96563	0.0034543	0.0799872	0.0736873	13071	tags=71%, list=23%, signal=54%	MTMR12/MTM1/SACM1L/MTMR6/MTMR10/SYNJ1/MTMR9/MTMR2/MTMR8/PTEN/INPP5F/MTMR1
GOBP_NEGATIVE_REGULATION_OF_BLOOD_CIRCULATION	GOBP_NEGATIVE_REGULATION_OF_BLOOD_CIRCULATION	24	0.604495	1.87847	0.00346189	0.0799872	0.0736873	8029	tags=29%, list=14%, signal=25%	MIR208A/MIR30E/ATP1A1/SPX/MIR26A1/PDE4D/AGTR2
GOBP_STRESS_FIBER_ASSEMBLY	GOBP_STRESS_FIBER_ASSEMBLY	102	0.368162	1.54198	0.00350089	0.0805962	0.0742483	15173	tags=51%, list=27%, signal=37%	APOA1/FRMD7/PPM1E/MIR138-1/CGNL1/LIMCH1/PPP1R9A/SFRP1/ARHGAP28/FHDC1/CUL3/PFN2/CLASP2/ARHGAP6/PHLDB2/ALMS1/ROCK1/CARMIL1/WNT11/MKKS/MET/WASF2/TACSTD2/FAM171A1/PIK3R1/BAG4/LPAR1/ROCK2/PAK2/MTOR/ARAP1/TJP1/NOX4/ARRB1/TPM1/S1PR1/PAK1/NRP1/RHOA/CDC42/TGFBR1/DLC1/SORBS1/PPFIA1/SDC4/SMAD3/CLASP1/TNFAIP1/MYOC/FERMT2/CCDC88A/PTGER4
GOBP_NUCLEAR_MIGRATION	GOBP_NUCLEAR_MIGRATION	19	0.674108	1.97265	0.00360821	0.0825102	0.0760116	8846	tags=58%, list=16%, signal=49%	NTN1/KIF1A/FBXW11/PCM1/DCTN1/DOCK7/CLMN/SYNE2/CEP120/PAFAH1B1/DYNC1H1
GOBP_NEGATIVE_REGULATION_OF_FIBRINOLYSIS	GOBP_NEGATIVE_REGULATION_OF_FIBRINOLYSIS	10	0.786698	1.91701	0.0036099	0.0825102	0.0760116	604	tags=30%, list=1%, signal=30%	HRG/APOH/CPB2
GOMF_OXIDOREDUCTASE_ACTIVITY_ACTING_ON_PAIRED_DONORS_WITH_INCORPORATION_OR_REDUCTION_OF_MOLECULAR_OXYGEN_NAD_P_H_AS_ONE_DONOR_AND_INCORPORATION_OF_ONE_ATOM_OF_OXYGEN	GOMF_OXIDOREDUCTASE_ACTIVITY_ACTING_ON_PAIRED_DONORS_WITH_INCORPORATION_OR_REDUCTION_OF_MOLECULAR_OXYGEN_NAD_P_H_AS_ONE_DONOR_AND_INCORPORATION_OF_ONE_ATOM_OF_OXYGEN	48	0.457491	1.6257	0.00363628	0.0828162	0.0762935	7071	tags=31%, list=12%, signal=27%	CYP7A1/CYP3A4/AKR1D1/AKR1C4/CYP51A1/FMO5/CYP1A1/FMO2/AKR1C1/FMO1/CYP7B1/CYP2B6/MICAL3/FAXDC2/CYP4A11
GOCC_VESICLE_TETHERING_COMPLEX	GOCC_VESICLE_TETHERING_COMPLEX	73	0.397897	1.55317	0.00365505	0.0829476	0.0764145	15034	tags=53%, list=26%, signal=39%	MYRIP/STXBP6/HOOK1/TRAPPC6B/TRAPPC8/EXOC8/EXOC5/COG5/COG2/NBAS/EXOC6B/VPS41/TRAPPC11/COG6/STX17/TRAPPC10/ZW10/RINT1/TRAPPC13/EXOC6/VPS54/EXOC4/EXOC7/TGFBRAP1/RAB10/AKTIP/EXOC2/VPS52/DNAJC28/SEPTIN2/COG3/CDC42/EXOC1/VPS51/VPS18/VPS11/EXOC3/COG8/HOOK3
GOBP_PHOSPHOLIPID_EFFLUX	GOBP_PHOSPHOLIPID_EFFLUX	13	0.740001	1.93738	0.00367109	0.0830161	0.0764776	439	tags=31%, list=1%, signal=31%	APOA5/APOC3/APOA2/APOA1
GOMF_TRANSLATION_REPRESSOR_ACTIVITY	GOMF_TRANSLATION_REPRESSOR_ACTIVITY	25	0.598872	1.87699	0.00369199	0.0831938	0.0766413	11040	tags=56%, list=19%, signal=45%	PAIP2B/TRIM71/CPEB4/DHFRP1/IREB2/EIF4EBP2/PURA/CPEB3/SHMT1/CPEB1/DHFR/PAIP2/FMR1/TYMS
GOBP_CELLULAR_RESPONSE_TO_THYROID_HORMONE_STIMULUS	GOBP_CELLULAR_RESPONSE_TO_THYROID_HORMONE_STIMULUS	16	0.663285	1.85028	0.00371284	0.0833689	0.0768026	9568	tags=50%, list=17%, signal=42%	KIT/PPARGC1A/THRB/RDX/MED1/GHSR/KLF9/GCLM
GOCC_RETROMER_COMPLEX	GOCC_RETROMER_COMPLEX	21	0.5898	1.76368	0.00374437	0.0837818	0.077183	16475	tags=71%, list=29%, signal=51%	DENND4C/ANKFY1/SNX2/DCTN1/TBC1D5/VPS35/VPS26A/SNX6/SNX27/SNX12/SNX1/SNX5/DENND5A/SNX3/RAB7A
GOMF_MONOOXYGENASE_ACTIVITY	GOMF_MONOOXYGENASE_ACTIVITY	101	0.366293	1.5314	0.00375892	0.0838134	0.0772121	7087	tags=26%, list=12%, signal=23%	CYP2A6/CYP17A1/CYP1A2/CYP2A7/CYP7A1/TYR/PAH/CYP3A4/AKR1D1/AKR1C4/TYRP1/CYP51A1/FMO5/CYP1A1/CYP11A1/FMO2/AKR1C1/FMO1/CYP3A7/CYP7B1/CYP2B6/CYP39A1/MICAL3/FAXDC2/CYP4A11/CYP2U1
GOBP_CELLULAR_RESPONSE_TO_HEAT	GOBP_CELLULAR_RESPONSE_TO_HEAT	120	0.356954	1.48868	0.00379441	0.08431	0.0776696	14271	tags=42%, list=25%, signal=32%	ARPP21/MAPT/TFEC/HSPA8/MAPK1/RANBP2/NUP160/NUP133/STAC/NUP153/POM121/HSP90AB2P/HSP90AB3P/NUP205/SIRT1/EP300/NUP155/CAMK2D/NDC1/THBS1/ATM/NUP58/TPR/BAG1/GSK3B/BAG5/HSP90AA1/NUP98/BAG4/DHX36/EIF2S1/SLU7/SEH1L/FGF1/IL1A/MTOR/CREBBP/RPA1/ATR/HSPH1/HSP90AB1/NUP54/TRPV4/CLPB/ATP2A2/NUP88/CXCL10/HSPA1L/HDAC2/PTGES3/NUP50
GOBP_PROTEIN_LIPID_COMPLEX_SUBUNIT_ORGANIZATION	GOBP_PROTEIN_LIPID_COMPLEX_SUBUNIT_ORGANIZATION	55	0.446026	1.67354	0.00381833	0.0845468	0.0778877	1157	tags=13%, list=2%, signal=12%	APOA5/ALB/APOC3/APOA2/APOA1/PLA2G3/SH3GL2
GOBP_RETROGRADE_TRANSPORT_ENDOSOME_TO_GOLGI	GOBP_RETROGRADE_TRANSPORT_ENDOSOME_TO_GOLGI	90	0.371797	1.53504	0.00383929	0.0847168	0.0780444	15559	tags=54%, list=27%, signal=40%	TBC1D14/RAB6D/LRRK2/PRKN/RGP1/GCC2/SPAG9/ANKFY1/SNX2/PREPL/RAB29/CLTC/DCTN1/PIKFYVE/TBC1D5/VPS35/TRAPPC10/ERC1/HEATR5B/VPS26A/VTI1B/GOSR1/SNX6/ARL1/TBC1D23/ARFIP1/VPS54/RIC1/HEATR5A/RBSN/VAMP3/RHOBTB3/VTI1A/TMEM87A/SNX12/VPS52/SNX1/RAB6A/EVI5/SNX5/USP7/VPS51/CLN5/DENND5A/RAB9A/WASHC2A/WASHC2C/SNX3/RAB9B
GOMF_INORGANIC_ANION_EXCHANGER_ACTIVITY	GOMF_INORGANIC_ANION_EXCHANGER_ACTIVITY	13	0.737315	1.93035	0.00386532	0.0849971	0.0783026	9692	tags=62%, list=17%, signal=51%	SLC4A1/SLC4A9/SLC22A8/SLC4A4/SLC4A5/SLC4A10/SLC22A11/SLC4A2
GOBP_VESICLE_MEDIATED_TRANSPORT_BETWEEN_ENDOSOMAL_COMPARTMENTS	GOBP_VESICLE_MEDIATED_TRANSPORT_BETWEEN_ENDOSOMAL_COMPARTMENTS	43	0.477471	1.6791	0.00392364	0.0859831	0.0792109	15532	tags=60%, list=27%, signal=44%	SORL1/HOOK1/RDX/MAPK1/KIF16B/DNAJC13/LMTK2/PIK3C3/CHMP3/DAB2/BECN1/MTMR2/RAB21/EEA1/EZR/SNX12/DENND10/AKTIP/ANKRD27/RAB5A/VPS11/MAP2K1/HOOK3/MYO1D/MSN/SNX3
GOBP_PROTEIN_AUTOUBIQUITINATION	GOBP_PROTEIN_AUTOUBIQUITINATION	72	0.401304	1.56015	0.00393948	0.0860344	0.0792582	15573	tags=56%, list=27%, signal=40%	TRIM71/RAG1/LRRK2/PRKN/RNF141/CUL3/LTN1/SH3RF1/RNF19B/ITCH/KLHL24/RNF11/UBE3A/RNF13/TRAF6/SASH1/MARCHF7/RNF185/UBE2D3/MARCHF5/TRIM68/NFX1/AMFR/CNOT4/ERCC8/WWP2/TRIM37/TAF1/RNF41/DTX3L/TRIM13/BFAR/BRCA1/RNF213/RNF4/UBE2B/RNF8/RNF157/RNF146/RNF186
GOBP_STEROID_HORMONE_MEDIATED_SIGNALING_PATHWAY	GOBP_STEROID_HORMONE_MEDIATED_SIGNALING_PATHWAY	133	0.348439	1.47316	0.00403581	0.0878374	0.0809192	14230	tags=43%, list=25%, signal=32%	DEFA1/ESRRG/BMP7/DEFA3/NR3C2/SRARP/ABHD2/CNOT1/ESRRB/PGR/AR/ZNF366/NCOA4/CYP7B1/UFSP2/SFRP1/PPARA/CRY2/CLOCK/MED1/UFL1/UBR5/SIRT1/GPAM/EP300/UBE3A/LATS1/RNF14/NCOR1/NEDD4/DAB2/RNF6/TMF1/NR3C1/TRIM68/PHB/NR4A3/PGRMC2/ESRRA/RBFOX2/YAP1/DNAJA1/PARP1/UBA5/JAK2/TRIP4/PAK1/STRN3/PLPP1/ARID1A/UFM1/BRCA1/KDM3A/VPS18/CRY1/PPARGC1B/VPS11
GOBP_SHORT_CHAIN_FATTY_ACID_METABOLIC_PROCESS	GOBP_SHORT_CHAIN_FATTY_ACID_METABOLIC_PROCESS	17	0.691746	1.94222	0.0040626	0.0881198	0.0811793	12678	tags=65%, list=22%, signal=50%	TYRP1/PCCA/PCK1/MMUT/PHYH/PCCB/MMAA/CRAT/ACSS1/ACOT4/PCK2
GOBP_TRANSEPITHELIAL_TRANSPORT	GOBP_TRANSEPITHELIAL_TRANSPORT	30	0.571281	1.85548	0.00411686	0.088994	0.0819846	11496	tags=57%, list=20%, signal=45%	CFTR/RHCG/RHBG/CLDN19/SLC5A1/ABCB1/SLC1A1/ITPR1/SLC12A2/EDNRB/GPLD1/ABCG2/SLC1A2/CXADR/AHCYL1/SLC1A3/EDN1
GOBP_REGULATION_OF_BILE_ACID_METABOLIC_PROCESS	GOBP_REGULATION_OF_BILE_ACID_METABOLIC_PROCESS	15	0.706621	1.95868	0.00413421	0.089067	0.082052	2515	tags=27%, list=4%, signal=25%	CYP7A1/KIT/CES1/ABCB11
GOBP_TRICARBOXYLIC_ACID_METABOLIC_PROCESS	GOBP_TRICARBOXYLIC_ACID_METABOLIC_PROCESS	14	0.702274	1.87938	0.00415425	0.0891975	0.0821722	10205	tags=57%, list=18%, signal=47%	SLC34A1/IDH3A/ACO2/IREB2/ACO1/ACLY/CS/GLUD1
GOMF_ALCOHOL_DEHYDROGENASE_NAD_P_PLUS_ACTIVITY	GOMF_ALCOHOL_DEHYDROGENASE_NAD_P_PLUS_ACTIVITY	10	0.781771	1.90501	0.0041844	0.0895435	0.0824909	481	tags=30%, list=1%, signal=30%	ADH1A/ADH4/ADH1C
GOBP_INORGANIC_ANION_TRANSMEMBRANE_TRANSPORT	GOBP_INORGANIC_ANION_TRANSMEMBRANE_TRANSPORT	120	0.354846	1.47989	0.00421994	0.0900019	0.0829132	7126	tags=26%, list=13%, signal=23%	BSND/SLC26A7/CLCNKB/SLC4A1/SLC12A3/CFTR/GABRA2/ANO5/CASR/CLCNKA/SLC26A3/SLC34A1/SLC26A4/GABRB2/ANO4/GABRB3/SLC13A1/CLIC5/CLCN5/SLC25A30/SLC12A1/GABRG1/PCYOX1/SLC1A1/CLIC4/CLCN3/SLC12A6/SLC12A2/XPR1/GLRB/CLCN4
GOMF_1_PHOSPHATIDYLINOSITOL_BINDING	GOMF_1_PHOSPHATIDYLINOSITOL_BINDING	14	0.699471	1.87188	0.00423651	0.0900541	0.0829613	14796	tags=86%, list=26%, signal=63%	SCIN/FRMPD2/ZFYVE9/ZFYVE16/WDFY3/ZFYVE1/PICALM/EEA1/EPB41/SNAP91/WDFY1/SNX9
GOMF_TRANSLATION_REPRESSOR_ACTIVITY_MRNA_REGULATORY_ELEMENT_BINDING	GOMF_TRANSLATION_REPRESSOR_ACTIVITY_MRNA_REGULATORY_ELEMENT_BINDING	15	0.704481	1.95275	0.0042917	0.0907018	0.083558	12980	tags=73%, list=23%, signal=57%	PAIP2B/CPEB4/DHFRP1/PURA/CPEB3/SHMT1/CPEB1/DHFR/PAIP2/TYMS/CPEB2
GOCC_PLATELET_ALPHA_GRANULE	GOCC_PLATELET_ALPHA_GRANULE	90	0.368665	1.52211	0.00429543	0.0907018	0.083558	516	tags=7%, list=1%, signal=7%	HRG/ALB/ORM2/ORM1/KNG1/AHSG
GOBP_MEMBRANE_DEPOLARIZATION_DURING_ACTION_POTENTIAL	GOBP_MEMBRANE_DEPOLARIZATION_DURING_ACTION_POTENTIAL	36	0.49703	1.66913	0.00432937	0.0911168	0.0839403	4450	tags=19%, list=8%, signal=18%	MIR208A/HCN2/SCN2B/ANK3/PTPN3/CACNA1D/ANK2
GOBP_PIGMENT_GRANULE_ORGANIZATION	GOBP_PIGMENT_GRANULE_ORGANIZATION	28	0.529911	1.70958	0.00436176	0.0914965	0.0842901	10235	tags=46%, list=18%, signal=38%	PMEL/TYRP1/GPR143/BCL2/RAB29/AP1G1/PIKFYVE/KIF13A/AP3B1/BLOC1S6/BLOC1S5/SHROOM2/RAB38
GOBP_BICARBONATE_TRANSPORT	GOBP_BICARBONATE_TRANSPORT	43	0.471544	1.65825	0.0044675	0.0934073	0.0860504	3494	tags=19%, list=6%, signal=17%	SLC26A7/SLC4A1/CFTR/SLC4A9/SLC26A3/SLC26A4/SLC4A4/CA2
GOBP_REGULATION_OF_HEART_RATE_BY_CARDIAC_CONDUCTION	GOBP_REGULATION_OF_HEART_RATE_BY_CARDIAC_CONDUCTION	39	0.486259	1.65913	0.00458403	0.0955307	0.0880065	8549	tags=33%, list=15%, signal=28%	KCNE5/SCN2B/DSG2/DSP/KCNE1B/CACNA1D/ANK2/KCNJ3/AKAP9/DSC2/PKP2/CTNNA3/CAMK2D
GOBP_REGULATION_OF_CELLULAR_RESPONSE_TO_VASCULAR_ENDOTHELIAL_GROWTH_FACTOR_STIMULUS	GOBP_REGULATION_OF_CELLULAR_RESPONSE_TO_VASCULAR_ENDOTHELIAL_GROWTH_FACTOR_STIMULUS	27	0.568227	1.82655	0.00461097	0.0957791	0.0882354	6376	tags=26%, list=11%, signal=23%	HRG/MIR329-1/CCBE1/IL12B/MIR16-1/PIK3CB/TSPAN12
GOBP_ANDROGEN_METABOLIC_PROCESS	GOBP_ANDROGEN_METABOLIC_PROCESS	30	0.567242	1.84236	0.00464241	0.0958313	0.0882834	1962	tags=20%, list=3%, signal=19%	CYP17A1/CYP3A4/PPARGC1A/AKR1D1/AKR1C4/HSD17B6
GOBP_POSITIVE_REGULATION_OF_B_CELL_ACTIVATION	GOBP_POSITIVE_REGULATION_OF_B_CELL_ACTIVATION	142	-0.473601	-1.42129	0.00465701	0.0958313	0.0882834	14557	tags=38%, list=26%, signal=28%	IGHV4-61/TRBC1/IL21/IL13/TNFRSF4/IGHV3-49/ADA/TRBC2/IGHV4-59/IGHV3-35/IGLL1/IL4/TNFRSF13C/IGHV3-72/IGHA1/IGHV7-4-1/IGHV3-38/IGHV5-51/IGHV3-53/IGHV4-4/IGHD/IGHG4/IGHV1-58/IGHV3-13/IGHV1OR15-1/IGHV1-69D/IGHA2/IGHV4-34/IGHV5-10-1/IGHV3-21/IGHV3-66/IGHM/IGHV3-64D/IGHV2-70/IGLC6/IGHV4-39/IGLC2/IGHV1-18/IGHG3/IGHG1/IGHV3-33/IL6/IGHG2/IGKC/IGLC7/IGHV1-69/IGHV6-1/IGLL5/IGHV3-64/IGHV1-69-2/IGHV3-30/IGHV1-…
GOMF_DEMETHYLASE_ACTIVITY	GOMF_DEMETHYLASE_ACTIVITY	39	0.485076	1.65509	0.00465857	0.0958313	0.0882834	14123	tags=41%, list=25%, signal=31%	CYP1A2/CYP51A1/CYP1A1/KDM1B/KDM6A/KDM3B/JMJD1C/KDM5A/FTO/RIOX2/KDM7A/KDM5B/MMACHC/KDM4C/KDM3A/KDM4D
GOBP_GAS_TRANSPORT	GOBP_GAS_TRANSPORT	20	0.62004	1.82571	0.00467614	0.0958835	0.0883315	3494	tags=30%, list=6%, signal=28%	AQP6/AQP5/HBG1/HBG2/NGB/CA2
GOBP_SERINE_FAMILY_AMINO_ACID_BIOSYNTHETIC_PROCESS	GOBP_SERINE_FAMILY_AMINO_ACID_BIOSYNTHETIC_PROCESS	21	0.579556	1.73305	0.00469791	0.0960211	0.0884584	15986	tags=71%, list=28%, signal=51%	AGXT/DHFRP1/AGXT2/SHMT1/SERINC5/MTHFD1/DHFR/CTH/DHFR2/SEPHS2/SERINC3/PSPH/PHGDH/GGT1/PSPHP1
GOBP_POST_EMBRYONIC_DEVELOPMENT	GOBP_POST_EMBRYONIC_DEVELOPMENT	76	0.388552	1.53555	0.00471988	0.0961619	0.088588	13513	tags=53%, list=24%, signal=40%	CYP1A2/SLC18A2/TAL2/LHX1/MMUT/ALDH5A1/IREB2/BCL2/ASH1L/FZD5/IGF2R/ITPR1/ARID5B/RC3H2/ACO1/ATRX/SCN9A/CCDC47/ATM/SLC4A10/CRB1/HEG1/ETNK2/PLAGL2/FGFR2/ZFX/PSEN1/RAB3A/SMAD2/MTOR/MECP2/PLEKHA1/MYO7A/KDM5B/MORC3/BCL2L11/CSRNP1/KLF4/SGPL1/TGFBR1
GOBP_POTASSIUM_ION_HOMEOSTASIS	GOBP_POTASSIUM_ION_HOMEOSTASIS	29	0.553168	1.78877	0.00475275	0.0965231	0.0889208	7077	tags=41%, list=12%, signal=36%	SLC12A3/SLC9A4/ATP6V1B1/ATP4B/ATP1A1/ATP12A/SLC12A1/TFAP2B/SLC12A6/SLC12A2/KCNJ10/ATP1B1
GOMF_LIPASE_INHIBITOR_ACTIVITY	GOMF_LIPASE_INHIBITOR_ACTIVITY	18	0.641713	1.81848	0.00483702	0.0979229	0.0902103	3919	tags=28%, list=7%, signal=26%	APOC3/APOA2/APOA1/SNCB/ANGPTL3
GOMF_U6_SNRNA_BINDING	GOMF_U6_SNRNA_BINDING	16	0.651914	1.81856	0.00487766	0.098433	0.0906802	403	tags=12%, list=1%, signal=12%	RNU4-2/RNU4-1
GOBP_ISOPRENOID_BIOSYNTHETIC_PROCESS	GOBP_ISOPRENOID_BIOSYNTHETIC_PROCESS	28	0.526078	1.69721	0.00491739	0.0989218	0.0911305	12204	tags=50%, list=21%, signal=39%	HMGCS2/CYP1A1/ALDH1A2/HMGCS1/ALDH8A1/HMGCR/PDSS2/CRPPA/DHRS9/NUS1/IDI1/RDH10/DHDDS/BCO1
GOBP_RESPONSE_TO_LEUCINE	GOBP_RESPONSE_TO_LEUCINE	13	0.721102	1.8879	0.00495802	0.0994255	0.0915946	13039	tags=69%, list=23%, signal=53%	PPARGC1A/RRAGD/PDX1/UBR1/SESN3/LARS1/UBR2/MTOR/SESN1
GOMF_ORGANIC_HYDROXY_COMPOUND_TRANSMEMBRANE_TRANSPORTER_ACTIVITY	GOMF_ORGANIC_HYDROXY_COMPOUND_TRANSMEMBRANE_TRANSPORTER_ACTIVITY	49	0.455045	1.64568	0.00507961	0.101344	0.0933618	9265	tags=45%, list=16%, signal=38%	SLCO1B1/SLC18A2/SLC10A1/SLC16A7/SLC6A2/AKR1C4/SLC10A2/ABCB11/AQP10/SLC6A4/SLC5A8/SLC5A1/SLCO1A2/SLC5A12/SLC2A13/SLC10A5/SLC51B/AQP2/SLC5A3/CEACAM1/AQP11/SLC10A6
GOBP_NEUTRAL_LIPID_METABOLIC_PROCESS	GOBP_NEUTRAL_LIPID_METABOLIC_PROCESS	134	0.337966	1.42565	0.00508547	0.101344	0.0933618	9233	tags=27%, list=16%, signal=23%	APOA5/APOC3/APOA2/APOH/APOA1/THRSP/AADAC/GPAT3/DGKI/CPS1/SORL1/ABHD2/G6PC/ACSL1/PCK1/CAT/MOGAT1/FITM2/FABP1/GK/ABHD6/LIPC/DDHD2/CPT1A/AGPAT5/PLA2G4A/SEL1L/PTPN11/SIRT1/INSIG1/GPAM/GPLD1/AGMO/LPIN2/PNPLA4/MIR30C1
GOBP_REGULATION_OF_CARDIAC_MUSCLE_CELL_ACTION_POTENTIAL	GOBP_REGULATION_OF_CARDIAC_MUSCLE_CELL_ACTION_POTENTIAL	27	0.561761	1.80577	0.00515026	0.102315	0.0942568	7336	tags=33%, list=13%, signal=29%	MIR208A/DSG2/DSP/ANK2/AKAP9/DSC2/NOS1AP/PKP2/CTNNA3
GOCC_SPANNING_COMPONENT_OF_MEMBRANE	GOCC_SPANNING_COMPONENT_OF_MEMBRANE	20	0.613661	1.80692	0.0053243	0.104836	0.0965792	7409	tags=40%, list=13%, signal=35%	SLC24A2/SLC4A4/AJAP1/SLC12A2/SLC24A1/NLGN1/SLC15A2/BMPR2
GOMF_PHOSPHOTRANSFERASE_ACTIVITY_FOR_OTHER_SUBSTITUTED_PHOSPHATE_GROUPS	GOMF_PHOSPHOTRANSFERASE_ACTIVITY_FOR_OTHER_SUBSTITUTED_PHOSPHATE_GROUPS	20	0.613787	1.8073	0.0053243	0.104836	0.0965792	11366	tags=60%, list=20%, signal=48%	CDS1/SGMS2/SELENOI/CHPT1/PIGO/CEPT1/SGMS1/AASDHPPT/PIGN/GNPTAB/PIGF/SAMD8
GOBP_MITOPHAGY	GOBP_MITOPHAGY	24	0.589443	1.8317	0.00532648	0.104836	0.0965792	15707	tags=62%, list=28%, signal=45%	VPS13D/PRKN/VPS13C/PINK1/HUWE1/MFN2/BECN1/USP30/RNF41/VDAC1/AMBRA1/OPTN/ATG14/SQSTM1/MAP1LC3B
GOBP_NUCLEOTIDE_PHOSPHORYLATION	GOBP_NUCLEOTIDE_PHOSPHORYLATION	131	0.337115	1.4103	0.00536081	0.105187	0.0969027	14389	tags=47%, list=25%, signal=35%	SLC4A1/PPARGC1A/OGDHL/PFKFB2/ZBTB20/PRKAA2/SLC4A4/AK5/ESRRB/PFKM/ENTPD5/PPARA/FBP1/PKLR/OGDH/AK7/RANBP2/NUP160/NUP133/PRKAG2/NUP153/POM121/NUP205/PRKAA1/PGK1/EP300/BPGM/NUP155/PGAM1/NDC1/DHTKD1/NCOR1/NME7/NUP58/TPR/P2RX7/ALDOB/NUP98/PSEN1/APP/AK4/NME6/SEH1L/ARNT/AK9/CMPK2/PGM1/NUP54/ENO4/PFKP/FOXK1/PGM2L1/IGF1/NUP88/CMPK1/PRKAG1/ENO3/HIF1A/PGAM4/INSR/NUP50/ALDOA
GOBP_PHOSPHATIDYLINOSITOL_METABOLIC_PROCESS	GOBP_PHOSPHATIDYLINOSITOL_METABOLIC_PROCESS	185	0.304958	1.41251	0.00538937	0.105423	0.0971201	13789	tags=46%, list=24%, signal=35%	CWH43/PLA2G4F/PIK3C2G/PLA2G3/INPP5J/PLCG2/CDS1/IMPA2/PIK3C2A/PTPN13/PIK3CA/MTMR12/MTM1/PGAP4/SACM1L/SOCS7/PIP5K1B/PIK3CB/PLEKHA2/PGAP1/PLCB1/PIGO/MTMR6/P3R3URF/PLA2G4A/SOCS6/PIK3C3/PIKFYVE/RAB14/PIK3R4/EFR3B/PIGH/PLA2G12A/PI4KA/MTMR10/GPLD1/SYNJ1/PI4K2B/ATM/CISH/IP6K3/MTMR9/FGF2/PLCD4/PIGN/PIGS/PIP4K2C/SOCS4/BPNT1/SH3YL1/PIP4P2/LCLAT1/FAM126B/MPPE1/MTMR2/PIK3R1/PIGK/PIGB/INPP4B/RAB4A/PIGA/MTMR8/P…
GOBP_NUCLEAR_TRANSCRIBED_MRNA_POLY_A_TAIL_SHORTENING	GOBP_NUCLEAR_TRANSCRIBED_MRNA_POLY_A_TAIL_SHORTENING	34	0.512558	1.74134	0.00542929	0.105525	0.0972141	17108	tags=59%, list=30%, signal=41%	CNOT1/CPEB3/CNOT6L/PNLDC1/CNOT7/TENT4B/TUT4/CNOT4/TNRC6B/CNOT6/TOB1/CNOT8/TUT7/BTG2/AGO2/MLH1/SAMD4A/EIF4ENIF1/CNOT10/CNOT11
GOBP_ALDEHYDE_CATABOLIC_PROCESS	GOBP_ALDEHYDE_CATABOLIC_PROCESS	12	0.718652	1.83572	0.00544423	0.105525	0.0972141	1119	tags=17%, list=2%, signal=16%	ADH4/AGXT
GOBP_REGULATION_OF_SULFUR_METABOLIC_PROCESS	GOBP_REGULATION_OF_SULFUR_METABOLIC_PROCESS	12	0.718062	1.83421	0.00544423	0.105525	0.0972141	14524	tags=83%, list=26%, signal=62%	PDK4/PDP1/PDP2/PDK2/BHMT/PDK1/PDK3/NFE2L2/PDPR/SP1
GOBP_PROTEIN_ACTIVATION_CASCADE	GOBP_PROTEIN_ACTIVATION_CASCADE	27	0.557837	1.79315	0.00547384	0.105547	0.0972342	3449	tags=22%, list=6%, signal=21%	SERPINC1/F9/APOH/KNG1/F7/F11
GOMF_ADP_BINDING	GOMF_ADP_BINDING	39	0.479966	1.63766	0.00547846	0.105547	0.0972342	12140	tags=51%, list=21%, signal=40%	H1-4/ATP1A1/ATP5F1A/GLUD2/MYO6/PRKAG2/GCLC/MIEF1/PGK1/APAF1/ME1/MSH2/MSH6/GLUD1/MYO18A/PRPS2/MYO3A/MYO7A/ABCG1/MYH10
GOBP_VASCULAR_ASSOCIATED_SMOOTH_MUSCLE_CELL_DIFFERENTIATION	GOBP_VASCULAR_ASSOCIATED_SMOOTH_MUSCLE_CELL_DIFFERENTIATION	34	0.512379	1.74073	0.00555933	0.106783	0.0983723	6796	tags=26%, list=12%, signal=23%	FGF9/KIT/MIR15B/MIR100/MIR140/MIR26A1/NFATC3/SGCB/MIR125B1
GOMF_SOLUTE_ANION_ANTIPORTER_ACTIVITY	GOMF_SOLUTE_ANION_ANTIPORTER_ACTIVITY	30	0.559827	1.81828	0.00563511	0.107321	0.0988684	5742	tags=30%, list=10%, signal=27%	SLC26A7/SLC4A1/SLC4A9/SLC22A9/SLC26A3/SLC26A4/SLC25A5/SLC25A4/SLC4A5
GOBP_RESPONSE_TO_OSMOTIC_STRESS	GOBP_RESPONSE_TO_OSMOTIC_STRESS	82	0.389917	1.56855	0.00563669	0.107321	0.0988684	14148	tags=54%, list=25%, signal=40%	SLC9A4/AQP5/SST/TACR3/PAPPA2/MAP7/WNK3/SLC2A4/TLR3/FMO1/NFAT5/SORD/ABCB1/SCN2A/SLC12A6/SLC12A2/ITGA2/EGFR/DDX3X/PKD2/PDPK1/KCNMA1/CAB39/HNMT/OXSR1/EFHD1/SLC25A23/ATF2/MICU1/XRCC5/MAPK13/HSP90AB1/NOLC1/TRPV4/LRRC8C/AQP1/BDKRB2/MBIP/MYLK/XRCC6/MARVELD3/LRRC8D/ERRFI1/STK39
GOCC_LATERAL_PLASMA_MEMBRANE	GOCC_LATERAL_PLASMA_MEMBRANE	62	0.412197	1.59494	0.00563785	0.107321	0.0988684	11275	tags=35%, list=20%, signal=28%	ATP6V1B1/MPP7/OCLN/DSG2/ATP1A1/ANK3/DSG1/CDH1/APC/PTPRO/SLC12A2/EPCAM/ATP1B1/CEACAM1/VANGL1/CLDN12/DLG1/TACSTD2/CTNNB1/GPSM2/FZD3/CLDN4
GOBP_MITOCHONDRIAL_FUSION	GOBP_MITOCHONDRIAL_FUSION	28	0.520516	1.67926	0.00575139	0.109007	0.100422	17436	tags=75%, list=31%, signal=52%	AFG3L2/PRKN/MIGA1/HUWE1/OPA1/MFN2/CHCHD3/MUL1/MFN1/USP30/TFRC/OMA1/GDAP1/PLD6/ZDHHC6/VAT1/BNIP3/STOML2/DNM1L/MFF/THG1L
GOBP_REGULATION_OF_SMOOTH_MUSCLE_CELL_DIFFERENTIATION	GOBP_REGULATION_OF_SMOOTH_MUSCLE_CELL_DIFFERENTIATION	39	0.4773	1.62856	0.0057766	0.109007	0.100422	10574	tags=36%, list=19%, signal=29%	FGF9/KIT/MIR15B/MIR100/MIR140/MIR26A1/NFATC3/ANKRD17/PIAS1/MIR125B1/SIRT1/CTH/FGFR2/PDCD4
GOCC_CORNIFIED_ENVELOPE	GOCC_CORNIFIED_ENVELOPE	45	-0.566368	-1.52982	0.00578761	0.109007	0.100422	10965	tags=40%, list=19%, signal=32%	PKP3/CST6/SPRR2G/CNFN/SPRR1A/SPRR2D/SPRR1B/SPRR3/TCHH/DSG3/IVL/SPRR2E/SPRR2A/PI3/DSC3/SPRR2F/SPRR2B/RPTN
GOMF_ALDEHYDE_DEHYDROGENASE_NAD_P_PLUS_ACTIVITY	GOMF_ALDEHYDE_DEHYDROGENASE_NAD_P_PLUS_ACTIVITY	16	0.647511	1.80628	0.0057948	0.109007	0.100422	8290	tags=50%, list=15%, signal=43%	ADH4/ALDH1L1/ALDH1A2/ALDH1B1/ALDH3A2/ALDH9A1/ALDH4A1/ADH5
GOMF_TRANSLATION_INITIATION_FACTOR_ACTIVITY	GOMF_TRANSLATION_INITIATION_FACTOR_ACTIVITY	51	0.449778	1.66057	0.00581492	0.109064	0.100474	16095	tags=49%, list=28%, signal=35%	EIF2S3B/EIF3L/EIF4B/EIF3A/EIF5/EIF3C/DHX29/EIF4G2/EIF4E3/EIF1B/EIF1AX/EIF4E/EIF2S1/MTIF2/EIF4H/EIF2A/EIF2S3/EIF3J/EIF3M/EIF4A2/AGO2/DENR/EIF3E/EIF3H/EIF4G3
GOBP_NAD_METABOLIC_PROCESS	GOBP_NAD_METABOLIC_PROCESS	50	0.440827	1.6103	0.00587588	0.109884	0.10123	13572	tags=36%, list=24%, signal=27%	NMRK2/GPD1L/NMNAT2/PFKM/GPD2/PKLR/PGK1/BPGM/PGAM1/NMNAT1/NADK2/ALDOB/SLC25A12/PCK2/PFKP/FOXK1/PGM2L1/ENO3
GOBP_REGULATION_OF_LIPOPROTEIN_LIPASE_ACTIVITY	GOBP_REGULATION_OF_LIPOPROTEIN_LIPASE_ACTIVITY	24	0.583262	1.81249	0.0059023	0.110055	0.101387	439	tags=17%, list=1%, signal=17%	APOA5/APOC3/APOH/APOA1
GOBP_TYPE_B_PANCREATIC_CELL_DEVELOPMENT	GOBP_TYPE_B_PANCREATIC_CELL_DEVELOPMENT	20	0.609634	1.79507	0.00606506	0.112246	0.103405	12879	tags=50%, list=23%, signal=39%	NKX6-1/INSM1/CLOCK/PDPK1/CDH2/GSK3B/CDK6/HNF4A/RFX3/BMP5
GOCC_AXONAL_GROWTH_CONE	GOCC_AXONAL_GROWTH_CONE	28	0.518248	1.67195	0.00608641	0.112246	0.103405	12697	tags=54%, list=22%, signal=42%	FLRT3/MYO9A/EPHA4/COBL/MAPK8IP1/PTCH1/TRAK2/PARD3/KIF5B/SHTN1/HSP90AA1/CYFIP1/NIN/HSP90AB1/GPM6A
GOMF_OXIDOREDUCTASE_ACTIVITY_ACTING_ON_PAIRED_DONORS_WITH_INCORPORATION_OR_REDUCTION_OF_MOLECULAR_OXYGEN	GOMF_OXIDOREDUCTASE_ACTIVITY_ACTING_ON_PAIRED_DONORS_WITH_INCORPORATION_OR_REDUCTION_OF_MOLECULAR_OXYGEN	160	0.318707	1.40785	0.00608958	0.112246	0.103405	7087	tags=20%, list=12%, signal=18%	CYP2A6/CYP17A1/CYP1A2/CYP2A7/CYP7A1/TYR/PAH/CYP3A4/AKR1D1/AKR1C4/TYRP1/CYP51A1/SC5D/FMO5/CYP1A1/CYP11A1/FMO2/EGLN1/AKR1C1/FMO1/CYP3A7/CYP7B1/CYP2B6/PHYH/SCD5/CYP39A1/KDM1B/MICAL3/TMLHE/FAXDC2/CYP4A11/CYP2U1
GOBP_POLYOL_CATABOLIC_PROCESS	GOBP_POLYOL_CATABOLIC_PROCESS	26	0.538985	1.70576	0.00609018	0.112246	0.103405	14781	tags=58%, list=26%, signal=43%	INPP5J/IMPA2/GK/NTSR1/SORD/GPD2/SYNJ1/BPNT1/MTMR2/OCRL/PTEN/IMPA1/GK5/BPNT2/INPP5A
GOBP_REGULATION_OF_MEMBRANE_DEPOLARIZATION	GOBP_REGULATION_OF_MEMBRANE_DEPOLARIZATION	42	0.478283	1.66281	0.00612486	0.11256	0.103694	8788	tags=36%, list=15%, signal=30%	MIR208A/SCN2B/GPD1L/ANK3/PTPN3/NEDD4L/LRRK2/NTSR1/BCL2/GOT1/MIR26A1/KDR/FGF12/CAMK2D/SLMAP
GOBP_DENDRITE_MORPHOGENESIS	GOBP_DENDRITE_MORPHOGENESIS	139	0.324061	1.3916	0.00618453	0.11333	0.104404	13818	tags=45%, list=24%, signal=34%	CTNNA2/TRPC5/NEDD4L/ZDHHC15/DCDC2/KIF1A/EPHA4/LRRK2/FARP1/PPP1R9A/CDKL5/ADGRB3/PTPRD/TMEM106B/KIDINS220/ARMCX5-GPRASP2/WASL/SHANK2/MEF2A/TNIK/NLGN1/SLITRK5/RAPGEF2/HECW2/CAPRIN1/TRAK2/OPA1/LZTS3/KLF7/UBE3A/CTNND2/VLDLR/NEDD4/RAP2A/HECW1/ADAM10/GSK3B/MAP2/PICALM/SDC2/DHX36/ACTR2/ABI2/RAB21/EPHB1/BTBD3/RBFOX2/PTEN/CELSR2/SARM1/PPP3CA/ANKRD27/DOCK10/PDLIM5/RERE/NRP1/CDC42/CHRNA3/FBXW8/KALRN/CHRNA7/B…
GOBP_GLYCEROLIPID_CATABOLIC_PROCESS	GOBP_GLYCEROLIPID_CATABOLIC_PROCESS	73	0.385182	1.50354	0.00640591	0.11705	0.107831	2999	tags=12%, list=5%, signal=12%	APOA5/APOC3/APOA2/APOA1/PLA2G4F/AADAC/CPS1/SORL1/ABHD2
GOBP_MRNA_5_SPLICE_SITE_RECOGNITION	GOBP_MRNA_5_SPLICE_SITE_RECOGNITION	20	0.603436	1.77682	0.00643543	0.117254	0.108019	3914	tags=30%, list=7%, signal=28%	RNU1-4/RNVU1-2A/RNVU1-7/RNU6ATAC/RNU4ATAC/RNVU1-17
GOBP_NEGATIVE_REGULATION_OF_CYTOSKELETON_ORGANIZATION	GOBP_NEGATIVE_REGULATION_OF_CYTOSKELETON_ORGANIZATION	155	0.319249	1.40604	0.00645756	0.117322	0.108081	15036	tags=50%, list=26%, signal=37%	CTNNA2/FRMD7/INPP5J/TUBB4A/SLIT2/SCIN/MIR138-1/SPTBN2/RDX/VIL1/CGNL1/PPP1R9A/PIK3CA/PRKN/EPS8/APC/ARHGAP28/GMFB/FHOD3/PFN2/DNAI3/ARFGEF1/CAPZA2/SNCA/SPTBN1/CLASP2/TAOK1/ARHGAP6/PHLDB2/ADD3/LIMA1/KAT2B/MTPN/CARMIL1/CAMSAP1/TTBK2/MKKS/SWAP70/MET/MAP2/CAMSAP2/WASF2/TACSTD2/SMAD4/TWF1/PIK3R1/DMTN/PAK2/TMOD2/ARAP1/NPM1/TMOD1/TRIM37/APC2/TJP1/SPTAN1/ATXN7/CRACD/NUBP1/TMOD3/S1PR1/PRKCD/SVIL/MAPRE1/DLC1/…
GOBP_ORGANELLE_TRANSPORT_ALONG_MICROTUBULE	GOBP_ORGANELLE_TRANSPORT_ALONG_MICROTUBULE	80	0.374916	1.48156	0.00655775	0.118803	0.109446	15554	tags=59%, list=27%, signal=43%	LRPPRC/KIF1A/MAPT/FBXW11/KIF1B/AGBL4/KIF3B/FYCO1/HAP1/TRAK2/OPA1/KIF13A/SYNE2/NEFL/PAFAH1B1/ARMCX3/DYNC1H1/AP3B1/BLOC1S6/BLOC1S5/KIF5B/HTT/MAP2/AP3M1/PRKCZ/KIF3A/TRAK1/KIFAP3/ACTR10/RHOT1/COPG2/ARHGAP21/UBB/RAB6A/CDC42/AP3S2/HIF1A/MAP1B/AP3D1/MREG/SPAST/BORCS5/LAMP1/KIF1C/AP3M2/WASF1/BICD2
GOBP_PROTEIN_DEGLYCOSYLATION	GOBP_PROTEIN_DEGLYCOSYLATION	28	0.51248	1.65334	0.00664478	0.120039	0.110584	17075	tags=71%, list=30%, signal=50%	MAN1C1/MAN2A1/MAN1A2/SEL1L/MAN1A1/MARCHF6/RNF185/AMFR/EDEM3/TRIM13/UGGT1/RNF139/EDEM1/NGLY1/OGA/OS9/MAN2A2/AGA/RNF5/UGGT2
GOBP_REGULATION_OF_RESPONSE_TO_TUMOR_CELL	GOBP_REGULATION_OF_RESPONSE_TO_TUMOR_CELL	17	0.674114	1.89271	0.00668074	0.120348	0.110869	9980	tags=47%, list=18%, signal=39%	HRG/SLC22A13/IL12B/HAVCR2/CEACAM1/MR1/HSPD1/FBXO38
GOBP_VASCULAR_ENDOTHELIAL_GROWTH_FACTOR_SIGNALING_PATHWAY	GOBP_VASCULAR_ENDOTHELIAL_GROWTH_FACTOR_SIGNALING_PATHWAY	47	0.459822	1.65141	0.0067365	0.12101	0.111479	8493	tags=30%, list=15%, signal=25%	HRG/MIR329-1/CCBE1/IL12B/MIR16-1/PIK3CA/MIR26A1/PIK3CB/TSPAN12/PRKD1/KDR/GAB1/NUS1/CADM4
GOMF_RETINOL_DEHYDROGENASE_ACTIVITY	GOMF_RETINOL_DEHYDROGENASE_ACTIVITY	20	0.60133	1.77061	0.00680581	0.121731	0.112143	4626	tags=30%, list=8%, signal=28%	ADH1A/ADH4/ADH1C/HSD17B6/ADH6/RDH16
GOBP_KETONE_BODY_METABOLIC_PROCESS	GOBP_KETONE_BODY_METABOLIC_PROCESS	12	0.710136	1.81396	0.00681479	0.121731	0.112143	4855	tags=50%, list=9%, signal=46%	OXCT1/HMGCS2/TYRP1/ACAT1/ACSS3/BDH1
GOBP_MULTI_ORGANISM_LOCALIZATION	GOBP_MULTI_ORGANISM_LOCALIZATION	66	0.395382	1.53075	0.00684908	0.121801	0.112208	16703	tags=61%, list=29%, signal=43%	RANBP2/NUP160/NUP133/NUP153/POM121/PIKFYVE/NUP205/NUP155/NDC1/NUP58/TPR/KPNA6/NMT2/NUP98/VPS37A/SEH1L/FMR1/TPCN2/EPS15/IFIT1/KPNA3/NUP54/UBB/UBAP1/KPNA1/TSG101/NUP88/KPNB1/NUP50/MVB12B/VPS37D/XPO1/POM121C/CAV2/CTSL/NUP37/NUP214/NUP42/RAB7A/NUP43
GOBP_NUCLEOBASE_METABOLIC_PROCESS	GOBP_NUCLEOBASE_METABOLIC_PROCESS	34	0.50466	1.7145	0.00686103	0.121801	0.112208	15251	tags=68%, list=27%, signal=50%	TTR/CPS1/ALDH6A1/GDA/URAD/ACP3/GMPR/MAPK1/SHMT1/RRM1/PPAT/TYMS/DPYD/MTOR/PRPS1/GMPS/CMPK1/GART/DPYS/GMPR2/UMPS/PAICS/CTPS2
GOBP_REGULATION_OF_CHOLESTEROL_BIOSYNTHETIC_PROCESS	GOBP_REGULATION_OF_CHOLESTEROL_BIOSYNTHETIC_PROCESS	48	0.440361	1.56483	0.00687602	0.121801	0.112208	14524	tags=52%, list=26%, signal=39%	CYP7A1/CYP51A1/SC5D/ERLIN2/HMGCS1/LPCAT3/MBTPS2/HMGCR/PRKAA1/GPAM/IDI1/DHCR7/MIR30C1/SREBF2/MIR185/FDFT1/ACACB/FGF1/ABCG1/MBTPS1/ERLIN1/ACACA/FDPS/KPNB1/SP1
GOBP_POSITIVE_REGULATION_OF_TRIGLYCERIDE_LIPASE_ACTIVITY	GOBP_POSITIVE_REGULATION_OF_TRIGLYCERIDE_LIPASE_ACTIVITY	11	0.750396	1.8809	0.00694711	0.122719	0.113054	439	tags=27%, list=1%, signal=27%	APOA5/APOH/APOA1
GOCC_ORGANELLE_MEMBRANE_CONTACT_SITE	GOCC_ORGANELLE_MEMBRANE_CONTACT_SITE	39	0.468893	1.59988	0.00696918	0.122769	0.1131	14419	tags=62%, list=25%, signal=46%	OSBPL1A/GRAMD1C/PDZD8/SACM1L/TOMM20/CANX/STX17/PIK3R4/ESYT3/SARAF/ZFYVE1/MOSPD2/RAB38/ESYT2/TMX2/AHCYL1/ACSL4/STARD3NL/SERAC1/CLCC1/ATG5/RMDN3/BCL2L10/ATG14
GOBP_MITOCHONDRION_LOCALIZATION	GOBP_MITOCHONDRION_LOCALIZATION	47	0.457716	1.64384	0.00705539	0.123945	0.114183	14667	tags=60%, list=26%, signal=44%	ALB/LRPPRC/MAPT/LRRK2/MTM1/SLC4A5/AGBL4/MEF2A/HAP1/TRAK2/OPA1/ZBED3/NEFL/MFN2/ARMCX3/MUL1/TRAK1/MFN1/ACTR10/RHOT1/ARMC1/UBB/PLIN5/CLUH/HIF1A/BHLHA15/MAP1B/SPAST
GOBP_POSITIVE_REGULATION_OF_CELL_SUBSTRATE_JUNCTION_ORGANIZATION	GOBP_POSITIVE_REGULATION_OF_CELL_SUBSTRATE_JUNCTION_ORGANIZATION	30	0.548667	1.78204	0.00710073	0.124399	0.114601	8750	tags=37%, list=15%, signal=31%	HRG/FMN1/EPB41L5/SFRP1/PTPRJ/DUSP3/ROCK1/TEK/KDR/MAPRE2/IQGAP1
GOBP_CELLULAR_MODIFIED_AMINO_ACID_BIOSYNTHETIC_PROCESS	GOBP_CELLULAR_MODIFIED_AMINO_ACID_BIOSYNTHETIC_PROCESS	48	0.440034	1.56367	0.00713549	0.124415	0.114616	9989	tags=42%, list=18%, signal=34%	GGT6/CKMT2/CKMT1B/CKMT1A/ACADM/DHFRP1/CHDH/GATM/TMLHE/GCLC/ALDH9A1/SHMT1/BBOX1/MTHFD1/DHFR/MTHFS/GCLM/DHFR2/CNDP2/CKB
GOBP_POSITIVE_REGULATION_OF_LIPID_METABOLIC_PROCESS	GOBP_POSITIVE_REGULATION_OF_LIPID_METABOLIC_PROCESS	148	0.327669	1.45605	0.00714242	0.124415	0.114616	13826	tags=43%, list=24%, signal=32%	APOA5/APOA2/APOA1/CYP7A1/PLA2G3/CGA/KIT/PPARGC1A/AADAC/CES1/AVPR1A/ZBTB20/TNFAIP8L3/ANGPTL3/FABP1/PPARA/ADGRF5/VAV3/ABHD6/PRKCE/CPT1A/P2RY12/CREBL2/GHSR/IRS1/PRKD1/TEK/FPR2/PIK3R4/PRKAA1/GPLD1/CREB1/ACSL3/FGF2/RDH10/FLT1/AGTR1/CHP1/RGN/RAB38/DGAT2/NR4A3/FGF1/MTOR/LPGAT1/MLYCD/ABCG1/FABP3/PPARG/ABHD5/FGFR3/CAPN2/AMBRA1/VAV2/LDLR/PRKCD/STARD4/PLIN5/CDC42/EEF1A2/ENPP7/SORBS1/PTK2
GOBP_DRUG_METABOLIC_PROCESS	GOBP_DRUG_METABOLIC_PROCESS	45	0.471126	1.67523	0.00716014	0.124415	0.114616	8369	tags=40%, list=15%, signal=34%	CYP2A6/ADH1A/CYP1A2/CYP2A7/CYP3A4/ABCB11/FMO5/CYP1A1/FMO2/AOX1/FMO1/CYP2B6/CYP2U1/NT5C2/DPEP1/UGT1A1/ADAL/CYP2J2
GOBP_PROTEIN_K48_LINKED_UBIQUITINATION	GOBP_PROTEIN_K48_LINKED_UBIQUITINATION	61	0.419851	1.61175	0.00719585	0.124696	0.114874	16344	tags=61%, list=29%, signal=43%	KLHL3/RNF152/NEDD4L/PRKN/TRIM44/ITCH/UBR5/MARCHF6/UBE3A/TRIM32/TOPORS/UBE2E1/UBE2D3/FBXO38/RNF6/UBE2G1/UBE2Q2/AMFR/BIRC2/BTRC/HACE1/UBE2K/TTC3/DTX3L/ARIH2/SKP1/BFAR/NHLRC4/RFFL/RNF4/UBE2H/UBE2B/RNF8/RNF146/PELI1/RNF115/RNF5
GOCC_SPANNING_COMPONENT_OF_PLASMA_MEMBRANE	GOCC_SPANNING_COMPONENT_OF_PLASMA_MEMBRANE	13	0.707927	1.85341	0.00722228	0.124814	0.114984	7409	tags=46%, list=13%, signal=40%	SLC24A2/SLC4A4/AJAP1/SLC24A1/SLC15A2/BMPR2
GOCC_PROTON_TRANSPORTING_TWO_SECTOR_ATPASE_COMPLEX_PROTON_TRANSPORTING_DOMAIN	GOCC_PROTON_TRANSPORTING_TWO_SECTOR_ATPASE_COMPLEX_PROTON_TRANSPORTING_DOMAIN	24	0.576097	1.79022	0.00724588	0.124884	0.115048	205	tags=8%, list=0%, signal=8%	ATP6V0A4/ATP6V0D2
GOBP_NEGATIVE_REGULATION_OF_PLASMA_MEMBRANE_BOUNDED_CELL_PROJECTION_ASSEMBLY	GOBP_NEGATIVE_REGULATION_OF_PLASMA_MEMBRANE_BOUNDED_CELL_PROJECTION_ASSEMBLY	30	0.545218	1.77083	0.00733546	0.126087	0.116156	6138	tags=20%, list=11%, signal=18%	HRG/STAP1/SLIT2/RAP1GAP/ARHGAP24/PFN2
GOBP_NEURON_FATE_SPECIFICATION	GOBP_NEURON_FATE_SPECIFICATION	27	-0.639202	-1.60241	0.00738098	0.126528	0.116563	12274	tags=52%, list=22%, signal=41%	POU3F2/FEV/MNX1/ISL1/POU4F1/FOXA1/DMRTA2/ATOH1/MYT1L/SOX1/ISL2/DMRT3/LHX3/TLX3
GOMF_POTASSIUM_ION_ANTIPORTER_ACTIVITY	GOMF_POTASSIUM_ION_ANTIPORTER_ACTIVITY	16	0.636631	1.77593	0.00746235	0.12758	0.117532	897	tags=19%, list=2%, signal=18%	SLC9A4/SLC24A2/SLC9A2
GOBP_MEDIUM_CHAIN_FATTY_ACID_METABOLIC_PROCESS	GOBP_MEDIUM_CHAIN_FATTY_ACID_METABOLIC_PROCESS	14	0.670608	1.79464	0.00760919	0.129469	0.119272	16323	tags=86%, list=29%, signal=61%	CES1/ABHD2/ACADM/CYP4A11/ABHD3/CROT/CRAT/OLAH/CYP4A22/OXSM/GLYATL2/ACAD9
GOBP_NEUTRAL_LIPID_CATABOLIC_PROCESS	GOBP_NEUTRAL_LIPID_CATABOLIC_PROCESS	47	0.454797	1.63336	0.00761343	0.129469	0.119272	2999	tags=17%, list=5%, signal=16%	APOA5/APOC3/APOA2/APOA1/AADAC/CPS1/SORL1/ABHD2
GOBP_NEGATIVE_REGULATION_OF_PROTEIN_BINDING	GOBP_NEGATIVE_REGULATION_OF_PROTEIN_BINDING	96	0.353318	1.45755	0.00764999	0.129745	0.119526	11257	tags=25%, list=20%, signal=20%	CFHR5/CFHR2/FRMD7/WFIKKN2/CFHR1/SORL1/EPB41L5/LRRK2/PPARA/ROCK1/XIRP1/ADRB2/TTBK2/DAB2/MIR148A/GSK3B/MAP2/USP33/ITGA4/TMBIM6/PTPRF/RALB/MAPK8/TFIP11
GOBP_REGULATION_OF_ARP2_3_COMPLEX_MEDIATED_ACTIN_NUCLEATION	GOBP_REGULATION_OF_ARP2_3_COMPLEX_MEDIATED_ACTIN_NUCLEATION	21	0.554601	1.65842	0.00779937	0.131927	0.121536	10733	tags=48%, list=19%, signal=39%	CTNNA2/GMFB/DNAI3/NCKAP1/WASL/AP1AR/WASF2/ARFIP1/CYFIP1/ABI2
GOCC_HIGH_DENSITY_LIPOPROTEIN_PARTICLE	GOCC_HIGH_DENSITY_LIPOPROTEIN_PARTICLE	27	0.54669	1.75732	0.00785841	0.132574	0.122133	510	tags=26%, list=1%, signal=26%	APOA5/APOC3/APOA2/APOH/APOA1/APOF/PON1
GOMF_ADENYLATE_CYCLASE_BINDING	GOMF_ADENYLATE_CYCLASE_BINDING	12	0.703488	1.79698	0.00788153	0.132613	0.122169	10128	tags=58%, list=18%, signal=48%	AKAP6/ADCY2/AKAP12/ADCY5/ADRB2/RAF1/CAP2
GOBP_PROTEIN_DEMANNOSYLATION	GOBP_PROTEIN_DEMANNOSYLATION	20	0.595053	1.75213	0.00791695	0.13278	0.122322	17075	tags=75%, list=30%, signal=52%	MAN1C1/MAN1A2/SEL1L/MAN1A1/MARCHF6/RNF185/AMFR/EDEM3/TRIM13/UGGT1/RNF139/EDEM1/OS9/RNF5/UGGT2
GOBP_THYROID_HORMONE_METABOLIC_PROCESS	GOBP_THYROID_HORMONE_METABOLIC_PROCESS	26	0.525032	1.66161	0.00796404	0.13278	0.122322	8097	tags=42%, list=14%, signal=36%	SULT2A1/CGA/DIO1/CTSK/IYD/GCNT4/SLC16A10/MED1/DUOXA2/DUOX2/SULT1B1
GOBP_INTRACELLULAR_STEROID_HORMONE_RECEPTOR_SIGNALING_PATHWAY	GOBP_INTRACELLULAR_STEROID_HORMONE_RECEPTOR_SIGNALING_PATHWAY	112	0.337745	1.40788	0.00798263	0.13278	0.122322	14230	tags=44%, list=25%, signal=33%	DEFA1/DEFA3/NR3C2/SRARP/CNOT1/PGR/AR/ZNF366/NCOA4/CYP7B1/UFSP2/SFRP1/CRY2/CLOCK/MED1/UFL1/UBR5/SIRT1/GPAM/EP300/UBE3A/LATS1/RNF14/NCOR1/NEDD4/DAB2/RNF6/TMF1/NR3C1/TRIM68/PHB/RBFOX2/YAP1/DNAJA1/PARP1/UBA5/JAK2/TRIP4/PAK1/STRN3/PLPP1/ARID1A/UFM1/BRCA1/KDM3A/VPS18/CRY1/PPARGC1B/VPS11
GOMF_NADP_BINDING	GOMF_NADP_BINDING	53	0.429731	1.59251	0.00798657	0.13278	0.122322	16355	tags=62%, list=29%, signal=44%	NNT/FMO5/FMO2/NOX5/CAT/DHFRP1/FMO1/HMGCR/HIBADH/CRYZ/DHFR/DHCR7/ME1/CBR4/DHFR2/MTRR/FMO4/HSD11B1/DPYD/GSR/LBR/GLYR1/GRHPR/QDPR/CRYZL1/DECR1/H6PD/MTHFR/SRD5A1/NOS1/IDH1/TM7SF2/NOS2
GOMF_OXYGEN_BINDING	GOMF_OXYGEN_BINDING	39	0.465886	1.58962	0.00801489	0.13278	0.122322	3784	tags=21%, list=7%, signal=19%	ALB/CYP17A1/CYP2A7/HBG1/CYP3A4/HBG2/NGB/CYP1A1
GOBP_DIGESTIVE_SYSTEM_PROCESS	GOBP_DIGESTIVE_SYSTEM_PROCESS	99	0.339946	1.41072	0.00803444	0.13278	0.122322	7516	tags=26%, list=13%, signal=23%	APOA5/SLC26A7/APOA1/SLC9A4/AQP5/CRH/CEL/CHRM1/NPR3/PTGER3/PLS1/SLC2A2/SLC5A1/VIL1/FABP1/IREB2/ABCG8/AKR1C1/LPCAT3/MUC2/CHRM3/HRH2/ACO1/GHSR/TLR4/LIMA1
GOBP_LIPID_IMPORT_INTO_CELL	GOBP_LIPID_IMPORT_INTO_CELL	34	0.499239	1.69609	0.00803717	0.13278	0.122322	14245	tags=59%, list=25%, signal=44%	GRM1/SLC27A2/ACSL1/SPX/NTSR1/SLC1A1/KCNJ10/EPRS1/CLN8/THBS1/ACSL3/SLC1A2/ITGB1/PSEN1/SLC1A3/CD36/FABP3/SLC27A5/PER2/ARL6IP5
GOBP_SODIUM_ION_TRANSMEMBRANE_TRANSPORT	GOBP_SODIUM_ION_TRANSMEMBRANE_TRANSPORT	171	0.307988	1.38838	0.00818662	0.134786	0.12417	10098	tags=32%, list=18%, signal=27%	SLC12A3/SLC4A9/SLC9A4/SLC24A2/SLC6A15/SLC9A2/HCN2/ATP4B/SLC6A2/SCN2B/ABCB11/SLC34A1/ATP1A1/SCNN1A/GPD1L/SLC4A4/WNK3/ANK3/PTPN3/SLC6A19/SLC6A4/NEDD4L/SLC5A1/ATP12A/SLC12A1/SLC6A18/SLC4A5/SLC17A2/SCN2A/SLC17A3/PRKCE/SLC12A2/SLC24A1/ATP1B1/SLC5A2/UTRN/SCN9A/HECW2/KLHL24/SLC41A1/PKD2/FGF12/ANO6/CAMK2D/FGF14/SLMAP/NEDD4/SLC4A10/HECW1/KIF5B/SHROOM2/CHP1/DLG1/WNK1/SLC17A4
GOBP_REGULATION_OF_LAMELLIPODIUM_ASSEMBLY	GOBP_REGULATION_OF_LAMELLIPODIUM_ASSEMBLY	40	0.458254	1.57083	0.00821526	0.134786	0.12417	10733	tags=40%, list=19%, signal=32%	HRG/FRMD7/OCLN/SLIT2/ATP7A/PIK3CA/NCKAP1/FER/AKIRIN1/WASF2/TWF1/PIK3R1/CYFIP1/ACTR2/DMTN/ABI2
GOBP_FLUID_TRANSPORT	GOBP_FLUID_TRANSPORT	31	0.512267	1.69031	0.00822201	0.134786	0.12417	4089	tags=19%, list=7%, signal=18%	AQP6/CFTR/AQP5/AQP10/AQP4/SLC5A1
GOBP_REGULATION_OF_TRIGLYCERIDE_CATABOLIC_PROCESS	GOBP_REGULATION_OF_TRIGLYCERIDE_CATABOLIC_PROCESS	14	0.664687	1.77879	0.00834953	0.136526	0.125773	2961	tags=36%, list=5%, signal=34%	APOA5/APOC3/APOA1/AADAC/SORL1
GOBP_PROTEIN_TARGETING_TO_LYSOSOME	GOBP_PROTEIN_TARGETING_TO_LYSOSOME	23	0.572336	1.75781	0.00837146	0.136534	0.12578	10888	tags=57%, list=19%, signal=46%	SORL1/NCOA4/ZFYVE16/HSPA8/GCC2/M6PR/LAMP2/AP3B1/NEDD4/AP3M1/SCARB2/GNPTAB/SORT1
GOBP_FATTY_ACID_BETA_OXIDATION	GOBP_FATTY_ACID_BETA_OXIDATION	75	0.388522	1.52435	0.00847731	0.137119	0.12632	11580	tags=45%, list=20%, signal=36%	ABCB11/ACAD11/ACAT1/ACADM/SLC27A2/EHHADH/FABP1/AUH/PPARA/ETFDH/ACAA2/CPT2/HADHB/ABCD3/CPT1A/IRS1/HADH/HSD17B4/PEX7/LONP2/ACOX2/ECHDC1/HADHA/ACOX1/ACADL/ETFA/PEX2/IVD/SCP2/ACACB/CROT/CRAT/MTOR/MLYCD
GOBP_INORGANIC_ION_IMPORT_ACROSS_PLASMA_MEMBRANE	GOBP_INORGANIC_ION_IMPORT_ACROSS_PLASMA_MEMBRANE	97	0.351504	1.45118	0.00849212	0.137119	0.12632	7097	tags=27%, list=12%, signal=23%	SLC12A3/SLC9A4/SLC24A2/SLC9A2/HCN2/ATP4B/TRPV5/SLC34A1/KCNJ1/ATP1A1/WNK3/SLC5A1/ATP12A/KCNJ11/SLC12A1/SLC39A8/KCNJ3/SLC31A1/KCNJ15/SLC30A1/SLC12A6/SLC12A2/KCNJ10/SLC24A1/ATP1B1/SLC5A2
GOBP_POSITIVE_REGULATION_OF_RESPONSE_TO_TUMOR_CELL	GOBP_POSITIVE_REGULATION_OF_RESPONSE_TO_TUMOR_CELL	14	0.660552	1.76773	0.00851486	0.137119	0.12632	9980	tags=43%, list=18%, signal=35%	HRG/SLC22A13/IL12B/MR1/HSPD1/FBXO38
GOCC_TRICARBOXYLIC_ACID_CYCLE_ENZYME_COMPLEX	GOCC_TRICARBOXYLIC_ACID_CYCLE_ENZYME_COMPLEX	14	0.664213	1.77753	0.00851486	0.137119	0.12632	10104	tags=71%, list=18%, signal=59%	OGDHL/DLD/BCKDHB/SUCLA2/DBT/SUCLG2/OGDH/SUCLG1/DLST/FH
GOMF_LIPASE_ACTIVATOR_ACTIVITY	GOMF_LIPASE_ACTIVATOR_ACTIVITY	14	0.661105	1.76921	0.00851486	0.137119	0.12632	400	tags=14%, list=1%, signal=14%	APOA5/APOH
GOBP_REGULATION_OF_GENERATION_OF_PRECURSOR_METABOLITES_AND_ENERGY	GOBP_REGULATION_OF_GENERATION_OF_PRECURSOR_METABOLITES_AND_ENERGY	159	0.315058	1.39477	0.00854864	0.137317	0.126501	14352	tags=45%, list=25%, signal=33%	SLC4A1/GCGR/PPARGC1A/PFKFB2/ZBTB20/PRKAA2/SLC4A4/ESRRB/ENTPD5/ATP7A/PRDM16/PIK3CA/PPARA/FBP1/RANBP2/SNCA/NUP160/NUP133/KHK/GHITM/PINK1/PDE12/PRKAG2/NUP153/POM121/IRS1/NUP205/PRKAA1/EP300/NUP155/PGAM1/NDC1/NCOR1/NUP58/TPR/GSK3B/P2RX7/PPIF/NUP98/ENPP1/PSEN1/TRAP1/SLC25A23/APP/AK4/IDE/SEH1L/OPN3/COX7A2L/MTOR/ARNT/SLC25A12/NOA1/IGF2/PPP1R3D/PPP1CB/NUP54/SLC25A33/IGF1/PPP1R3B/CISD1/NUP88/PRKAG1/COX7A1…
GOBP_2_OXOGLUTARATE_METABOLIC_PROCESS	GOBP_2_OXOGLUTARATE_METABOLIC_PROCESS	16	0.632208	1.76359	0.00863045	0.138282	0.127391	8385	tags=44%, list=15%, signal=37%	TAT/L2HGDH/DLD/GOT1/PHYH/OGDH/DLST
GOBP_RESPONSE_TO_EPIDERMAL_GROWTH_FACTOR	GOBP_RESPONSE_TO_EPIDERMAL_GROWTH_FACTOR	46	0.458718	1.6253	0.00872417	0.139434	0.128452	16413	tags=63%, list=29%, signal=45%	ERBB4/GAREM1/VIL1/MAPK1/MED1/TDGF1/DUSP3/EGFR/PTPN11/EEF1A1/PDPK1/ERBB2/ZFP36L2/IQGAP1/TPR/BECN1/CBL/BAG4/STAT5B/ASCL1/FOXC1/DAB2IP/SOX9/ERRFI1/PDE8A/AKT1/SYAP1/PTPN12/ZPR1
GOBP_POSITIVE_REGULATION_OF_FOCAL_ADHESION_ASSEMBLY	GOBP_POSITIVE_REGULATION_OF_FOCAL_ADHESION_ASSEMBLY	25	0.560776	1.75759	0.00881488	0.140531	0.129463	8750	tags=36%, list=15%, signal=30%	HRG/FMN1/EPB41L5/SFRP1/PTPRJ/ROCK1/TEK/KDR/IQGAP1
GOBP_VENTRICULAR_CARDIAC_MUSCLE_CELL_ACTION_POTENTIAL	GOBP_VENTRICULAR_CARDIAC_MUSCLE_CELL_ACTION_POTENTIAL	33	0.531175	1.7838	0.008852	0.140771	0.129684	7336	tags=36%, list=13%, signal=32%	KCNE5/DSG2/GPD1L/NEDD4L/DSP/KCNE1B/ANK2/KCNJ3/DSC2/NOS1AP/PKP2/CTNNA3
GOBP_DEFENSE_RESPONSE_TO_BACTERIUM	GOBP_DEFENSE_RESPONSE_TO_BACTERIUM	334	-0.417031	-1.29361	0.00890169	0.141209	0.130087	11074	tags=29%, list=19%, signal=24%	PGLYRP3/GSDMB/CXCL13/KLK5/IGHV3-72/LYG2/IGHA1/IGHV7-4-1/IGHV3-38/WFDC13/WFDC10A/IGHV5-51/H2BC7/FGB/IGHV3-53/IGHV4-4/CHGA/IGHD/IGHG4/IL23R/IGHV1-58/DEFB119/IGHV3-13/LACRT/IGHV1OR15-1/IGHV1-69D/IGHA2/IGHV4-34/WFDC3/PGLYRP2/IGHV5-10-1/IGHV3-21/IGKV3-20/IGHV3-66/IGHM/IGHV3-64D/DEFA5/LPO/IGHV2-70/IGLC6/IGHV4-39/CXCL6/IGLC2/IGHV1-18/SLPI/IGHG3/NLRP10/IGHG1/IGHV3-33/LCE3B/C10orf99/IL6/IGHG2/IGKC/IGLC7/W…
GOBP_REGULATION_OF_ACTOMYOSIN_STRUCTURE_ORGANIZATION	GOBP_REGULATION_OF_ACTOMYOSIN_STRUCTURE_ORGANIZATION	95	0.356412	1.46007	0.00898041	0.141781	0.130614	15742	tags=55%, list=28%, signal=40%	APOA1/FRMD7/PPM1E/MIR138-1/CGNL1/LIMCH1/PPP1R9A/SFRP1/ARHGAP28/PFN2/CLASP2/ARHGAP6/PHLDB2/ALMS1/ROCK1/CARMIL1/WNT11/MKKS/MET/WASF2/TACSTD2/SMAD4/PIK3R1/BAG4/LPAR1/AKAP13/ROCK2/PAK2/MTOR/EDN1/ARAP1/TJP1/NOX4/TPM1/S1PR1/PAK1/NRP1/RHOA/CDC42/TGFBR1/DLC1/PPFIA1/SDC4/SMAD3/CLASP1/MYOC/FERMT2/CCDC88A/PTGER4/TSC1/MYLK3/ARHGEF5
GOCC_INCLUSION_BODY	GOCC_INCLUSION_BODY	74	0.382755	1.49085	0.0089822	0.141781	0.130614	12515	tags=46%, list=22%, signal=36%	SNCB/NEFM/AGL/MAPT/LRRK2/PRDM16/WDFY3/PRKN/RANBP2/SNCA/PINK1/HAP1/NUP153/UBQLN1/NBN/XRN2/ARIH1/TPR/BAG5/HTT/PICALM/TDP2/URB2/NUP98/PSEN1/FBXO7/ZBTB14/EPS15/TRIM37/ATXN1/EEF2/SLF1/HSP90AB1/HERPUD1
GOBP_GPI_ANCHOR_METABOLIC_PROCESS	GOBP_GPI_ANCHOR_METABOLIC_PROCESS	31	0.506243	1.67044	0.00903837	0.142159	0.130962	11406	tags=45%, list=20%, signal=36%	CWH43/PGAP4/PGAP1/PIGO/PIGH/GPLD1/PIGN/PIGS/MPPE1/PIGK/PIGB/PIGA/PIGF/PIGV
GOBP_POSITIVE_REGULATION_OF_LIPID_CATABOLIC_PROCESS	GOBP_POSITIVE_REGULATION_OF_LIPID_CATABOLIC_PROCESS	27	0.539723	1.73493	0.00905071	0.142159	0.130962	7383	tags=37%, list=13%, signal=32%	APOA5/APOA2/APOA1/AADAC/ANGPTL3/FABP1/PPARA/PRKCE/CPT1A/IRS1
GOBP_SPHINGOLIPID_METABOLIC_PROCESS	GOBP_SPHINGOLIPID_METABOLIC_PROCESS	167	0.293144	1.31819	0.00916552	0.143608	0.132297	13642	tags=46%, list=24%, signal=35%	SFTPB/CEL/KIT/CERKL/ST8SIA5/UGT8/GBA3/CERS6/FA2H/ELOVL7/ASAH1/ACER2/HACD3/PPM1L/ST8SIA6/ABCA8/CERS2/SGMS2/ITGB8/B4GALT6/B4GALNT1/SERINC1/CERT1/B3GALNT1/SPTLC3/FUT3/ALDH3A2/FUT6/ELOVL4/SGMS1/PRKD1/PSAPL1/HACD2/SPTLC2/PLPP3/CLN8/GALC/TEX2/ST8SIA4/PRKAA1/SGPP1/KDSR/ESYT3/SERINC5/VAPB/SPTLC1/PRKD3/ST6GALNAC3/STS/ESYT1/ASAH2/PDXDC1/ESYT2/PSAP/GLB1/SGPP2/B4GALT5/SAMD8/VAPA/ST3GAL1/SUMF2/CLN6/SPNS2/PPT1…
GOBP_POSITIVE_REGULATION_OF_VASCULAR_ASSOCIATED_SMOOTH_MUSCLE_CELL_PROLIFERATION	GOBP_POSITIVE_REGULATION_OF_VASCULAR_ASSOCIATED_SMOOTH_MUSCLE_CELL_PROLIFERATION	42	0.4634	1.61107	0.00936819	0.146424	0.134891	477	tags=5%, list=1%, signal=5%	MIR208A/FGF9
GOBP_AMINO_ACID_ACTIVATION	GOBP_AMINO_ACID_ACTIVATION	49	0.439424	1.58919	0.00954537	0.148828	0.137106	15782	tags=53%, list=28%, signal=38%	LARS2/DARS2/IARS2/MARS2/EPRS1/NARS2/AASDH/PARS2/IARS1/EARS2/PPA2/WARS2/LARS1/TARS3/NARS1/QRSL1/DARS1/TARS1/GATC/RARS1/AIMP2/RARS2/FARS2/AIMP1/GATB/DALRD3
GOMF_PRE_MRNA_5_SPLICE_SITE_BINDING	GOMF_PRE_MRNA_5_SPLICE_SITE_BINDING	15	0.668879	1.85407	0.00957538	0.148909	0.13718	3914	tags=40%, list=7%, signal=37%	RNU1-4/RNVU1-2A/RNVU1-7/RNU6ATAC/RNU4ATAC/RNVU1-17
GOBP_ONE_CARBON_METABOLIC_PROCESS	GOBP_ONE_CARBON_METABOLIC_PROCESS	40	0.454592	1.55828	0.00959723	0.148909	0.13718	11040	tags=50%, list=19%, signal=40%	CA10/GNMT/ALDH1L1/CA2/AHCYL2/DHFRP1/SHMT1/MAT2A/MAT2B/CA4/MTHFD1/DHFR/SFXN1/MTHFS/DHFR2/CA12/CA5A/AHCYL1/CA5B/TYMS
GOBP_SECONDARY_METABOLITE_BIOSYNTHETIC_PROCESS	GOBP_SECONDARY_METABOLITE_BIOSYNTHETIC_PROCESS	23	0.567079	1.74166	0.00968188	0.149858	0.138055	9264	tags=35%, list=16%, signal=29%	CYP1A2/PMEL/TYR/TYRP1/APPL1/RAPGEF2/SLC45A2/OCA2
GOBP_NEGATIVE_REGULATION_OF_CELL_ADHESION_MOLECULE_PRODUCTION	GOBP_NEGATIVE_REGULATION_OF_CELL_ADHESION_MOLECULE_PRODUCTION	12	0.698424	1.78405	0.00971795	0.150052	0.138233	4164	tags=25%, list=7%, signal=23%	APOA1/MIR1298/MIR206
GOBP_AMYLOID_BETA_METABOLIC_PROCESS	GOBP_AMYLOID_BETA_METABOLIC_PROCESS	64	0.389535	1.50116	0.00979054	0.150807	0.13893	15128	tags=53%, list=27%, signal=39%	MIR15B/SORL1/MIR361/MIR206/EPHA4/SPON1/SLC2A13/BACE2/HAP1/ROCK1/APH1B/MME/LRRTM3/NAT8B/ADAM10/BECN1/APEH/PICALM/NTRK2/TMED10/PSEN1/IDE/ROCK2/MIR186/ABCG1/RTN4/IGF1/RTN3/PRNP/CHRNA7/SP1/BACE1/NAT8/APH1A
GOCC_RECYCLING_ENDOSOME_MEMBRANE	GOCC_RECYCLING_ENDOSOME_MEMBRANE	86	0.359945	1.45706	0.00983348	0.151104	0.139203	14734	tags=44%, list=26%, signal=33%	SLC26A7/CFTR/ABCB11/SORL1/ZDHHC2/PLEKHB2/SCAMP1/RAB11FIP2/SLC1A1/RAB11FIP4/ATP11B/CLCN4/RAB14/VTI1B/ABHD17B/RAB11FIP5/STX12/RAP2A/SYT11/RAB8B/NDRG1/RAB4A/RAB10/VAMP3/ABHD17C/PACSIN2/SCAMP5/SLC9A6/FZD7/NEU3/RAB11A/INPP4A/OPTN/RFFL/CD274/EHD4/SLC9A7/B2M
GOBP_REGULATION_OF_CHOLESTEROL_METABOLIC_PROCESS	GOBP_REGULATION_OF_CHOLESTEROL_METABOLIC_PROCESS	61	0.406207	1.55937	0.00996755	0.152796	0.140761	12834	tags=46%, list=23%, signal=36%	CYP7A1/CES1/CYP51A1/SC5D/FMO5/ERLIN2/HMGCS1/LPCAT3/MBTPS2/HMGCR/EPHX2/TTC39B/PRKAA1/GPAM/IDI1/DHCR7/MIR30C1/SREBF2/MIR185/ACADL/FDFT1/DGAT2/ACACB/FGF1/ABCG1/MBTPS1/ERLIN1/ACACA
GOMF_LIGASE_ACTIVITY_FORMING_CARBON_SULFUR_BONDS	GOMF_LIGASE_ACTIVITY_FORMING_CARBON_SULFUR_BONDS	41	0.466297	1.61913	0.0100177	0.153196	0.14113	15444	tags=56%, list=27%, signal=41%	ACSS3/SLC27A2/ACSL1/SUCLA2/SUCLG2/ACSM3/AASDH/SUCLG1/ACSBG1/ACSL3/ACSS1/ACSL4/ACSM6/ACSM5/UBA5/MOCS3/ACSM2B/UBA3/SLC27A5/UBA2/AACS/ACSM2A/ATG7
GOMF_NUCLEAR_RECEPTOR_BINDING	GOMF_NUCLEAR_RECEPTOR_BINDING	97	0.343766	1.41923	0.0100459	0.15326	0.141189	14580	tags=44%, list=26%, signal=33%	NR0B2/PPARGC1A/SRARP/CNOT1/SLC30A9/ZNF366/NRIP1/NCOA2/TACC1/STRN/MED1/NCOA1/EP300/DCAF1/VDR/RARB/LATS1/RNF14/NCOA3/LCOR/NSD1/CTNNB1/RNF6/TMF1/TRIM68/NR4A3/PPARG/BAZ2A/STAT5B/ARRB1/PARP1/FOXP2/TRIP4/UBA3/NCOA6/ARID1A/KDM4C/KDM3A/GRIP1/PPARGC1B/WIPI1/TRIM24/RERG
GOBP_HISTONE_H2A_UBIQUITINATION	GOBP_HISTONE_H2A_UBIQUITINATION	26	0.513155	1.62402	0.0101502	0.154188	0.142044	15222	tags=62%, list=27%, signal=45%	PCGF5/TRIP12/UBR5/OTUB2/DDB1/BCOR/CUL4B/UBR2/RYBP/TRIM37/DTX3L/SKP1/BMI1/RNF2/UBE2B/RNF8
GOBP_NEGATIVE_REGULATION_OF_SMOOTH_MUSCLE_CELL_DIFFERENTIATION	GOBP_NEGATIVE_REGULATION_OF_SMOOTH_MUSCLE_CELL_DIFFERENTIATION	21	0.545271	1.63052	0.0101756	0.154188	0.142044	6633	tags=29%, list=12%, signal=25%	FGF9/MIR15B/MIR100/MIR26A1/NFATC3/ANKRD17
GOMF_STEROID_HYDROXYLASE_ACTIVITY	GOMF_STEROID_HYDROXYLASE_ACTIVITY	38	0.47709	1.6078	0.0101792	0.154188	0.142044	5821	tags=32%, list=10%, signal=28%	CYP2A6/CYP17A1/CYP1A2/CYP2A7/CYP7A1/CYP3A4/CYP1A1/CYP11A1/CYP3A7/CYP7B1/CYP2B6/CYP39A1
GOBP_VESICLE_TARGETING	GOBP_VESICLE_TARGETING	95	0.352944	1.44586	0.0102186	0.154417	0.142255	16860	tags=58%, list=30%, signal=41%	TRAPPC6B/USO1/TRIP11/SEC24C/CUL3/SEC24B/MCFD2/LMAN1/CLASP2/AP1AR/NLGN1/TRAPPC10/SEC24A/WDR11/KLHL12/GOSR1/CNIH1/FAM91A1/CHP1/TGFA/TBC1D23/F8/PPP6C/SEC23IP/TMED10/PSEN1/EXOC4/STARD3NL/ANKRD28/SNAP23/SEC31A/SEC22B/SEC23A/SAR1B/C17orf75/CD59/SNAP29/SCFD1/TMED2/PPP6R3/NSF/SEC16A/WIPI1/RAB1B/CLASP1/ARFGAP2/ARFGAP3/RAB1A/IRAG2/CRYZL2P-SEC16B/NAPA/F5/SEC24D/CTSC/GBF1
GOBP_REGULATION_OF_ACTIN_NUCLEATION	GOBP_REGULATION_OF_ACTIN_NUCLEATION	30	0.533888	1.73404	0.0102696	0.154821	0.142627	10733	tags=47%, list=19%, signal=38%	CTNNA2/SCIN/FMN1/VIL1/GMFB/DNAI3/WASHC5/NCKAP1/WASL/AP1AR/WASF2/ARFIP1/CYFIP1/ABI2
GOBP_REGULATION_OF_TRIGLYCERIDE_METABOLIC_PROCESS	GOBP_REGULATION_OF_TRIGLYCERIDE_METABOLIC_PROCESS	38	0.475276	1.60169	0.0103278	0.155068	0.142854	2961	tags=16%, list=5%, signal=15%	APOA5/APOC3/APOA1/THRSP/AADAC/SORL1
GOBP_REGULATION_OF_CYTOPLASMIC_TRANSPORT	GOBP_REGULATION_OF_CYTOPLASMIC_TRANSPORT	27	0.531758	1.70932	0.0103514	0.155068	0.142854	15532	tags=78%, list=27%, signal=57%	SORL1/RDX/LRRK2/PRKN/MAPK1/DNAJC13/RAB29/CHMP3/DAB2/MAP2/ARFIP1/MTMR2/RAB21/EZR/SNX12/DENND10/USP7/VPS11/MAP2K1/MSN/SNX3
GOBP_GLYCINE_METABOLIC_PROCESS	GOBP_GLYCINE_METABOLIC_PROCESS	19	0.633376	1.85346	0.0103589	0.155068	0.142854	9667	tags=42%, list=17%, signal=35%	BAAT/AGXT/DHFRP1/AGXT2/SHMT1/DHFR/GLYAT/DHFR2
GOBP_B_CELL_MEDIATED_IMMUNITY	GOBP_B_CELL_MEDIATED_IMMUNITY	217	-0.43095	-1.32066	0.0105685	0.157253	0.144867	16770	tags=43%, list=29%, signal=31%	KMT5C/FOXP3/IGLV7-43/TCIRG1/TRDC/IGKV4-1/IGHV2-5/IGLV3-19/IGHV2-26/XCL1/BCL3/IGLV2-8/IGKV1-5/IGHV4-61/TRBC1/C1S/IRF7/IGKV2-30/C2/IGHV3-49/IGLV2-11/TRBC2/IGLV1-51/IGHV4-59/BATF/IGHV3-35/C1R/IGLL1/IL4/IGHV3-72/IGHA1/IGHV7-4-1/IGHV3-38/IGHV5-51/IGHV3-53/IGHV4-4/IGHD/IGHG4/IGLV2-23/IGLV1-47/IGHV1-58/IGHV3-13/IGHV1OR15-1/IGHV1-69D/IGKV1D-33/IGKV1D-12/IGHA2/IGHV4-34/IGLV3-27/IGHV5-10-1/IGHV3-21/C17orf9…
GOBP_INOSITOL_PHOSPHATE_CATABOLIC_PROCESS	GOBP_INOSITOL_PHOSPHATE_CATABOLIC_PROCESS	18	0.600941	1.70294	0.0106477	0.157253	0.144867	14781	tags=61%, list=26%, signal=45%	INPP5J/IMPA2/NTSR1/SYNJ1/BPNT1/MTMR2/OCRL/PTEN/IMPA1/BPNT2/INPP5A
GOBP_NEGATIVE_REGULATION_OF_CELLULAR_RESPONSE_TO_VASCULAR_ENDOTHELIAL_GROWTH_FACTOR_STIMULUS	GOBP_NEGATIVE_REGULATION_OF_CELLULAR_RESPONSE_TO_VASCULAR_ENDOTHELIAL_GROWTH_FACTOR_STIMULUS	18	0.600053	1.70043	0.0106477	0.157253	0.144867	6367	tags=28%, list=11%, signal=25%	HRG/MIR329-1/IL12B/MIR16-1/PIK3CB
GOBP_REVERSE_CHOLESTEROL_TRANSPORT	GOBP_REVERSE_CHOLESTEROL_TRANSPORT	18	0.59939	1.69855	0.0106477	0.157253	0.144867	2480	tags=22%, list=4%, signal=21%	APOC3/APOA2/APOA1/CES1
GOMF_GLUCURONOSYLTRANSFERASE_ACTIVITY	GOMF_GLUCURONOSYLTRANSFERASE_ACTIVITY	33	0.523098	1.75667	0.0106585	0.157253	0.144867	10242	tags=39%, list=18%, signal=32%	UGT2B15/UGT2B4/UGT2B28/UGT2A3/UGT3A1/UGT1A9/UGT1A4/UGT1A6/UGT1A1/UGT2B7/CSGALNACT1/LARGE2/UGT2A1
GOBP_IMPORT_ACROSS_PLASMA_MEMBRANE	GOBP_IMPORT_ACROSS_PLASMA_MEMBRANE	161	0.306362	1.37054	0.0106668	0.157253	0.144867	13585	tags=45%, list=24%, signal=34%	SLC12A3/SLC9A4/SLC24A2/SLC9A2/HCN2/ATP4B/TRPV5/LRP2/SLC34A1/KCNJ1/ATP1A1/GRM1/WNK3/ACSL1/SLC5A1/ATP12A/ACE2/KCNJ11/SLC22A2/SLC12A1/SLC39A8/KCNJ3/SLC47A1/SLC31A1/NTSR1/SLC7A8/KCNJ15/SLC1A1/SLC30A1/SLC12A6/SLC12A2/KCNJ10/SLC24A1/ATP1B1/SLC5A2/SLC15A2/CLN8/SLC5A3/THBS1/SLC1A2/SLC36A4/DLG1/WNK1/KCNJ16/SLC7A1/KCNK9/ITGB1/SLC36A1/FAM155B/PSEN1/SLC9A3/SLC12A7/SLC22A4/SLC1A3/SLC16A2/HCN4/SLC39A6/CD36/SLC…
GOBP_L_PHENYLALANINE_METABOLIC_PROCESS	GOBP_L_PHENYLALANINE_METABOLIC_PROCESS	11	0.728104	1.82502	0.0106775	0.157253	0.144867	1285	tags=18%, list=2%, signal=18%	TAT/PAH
GOBP_MEMBRANE_DOCKING	GOBP_MEMBRANE_DOCKING	181	0.292958	1.35158	0.0107367	0.15747	0.145067	15120	tags=43%, list=27%, signal=32%	CFTR/UNC13C/TUBB4A/RAB3IP/AKAP9/USO1/PDZD8/STXBP1/UNC13B/PCM1/EXOC6B/ALMS1/DCTN1/ROCK1/CC2D2A/STX17/ESYT3/VTI1B/PAFAH1B1/STX3/DYNC1H1/BLOC1S6/STX7/STX12/VAPB/CCP110/TTBK2/EXOC6/HAUS2/ESYT1/TCTN2/CHP1/ESYT2/RAB3B/HSP90AA1/RAB3D/EXOC4/RAB8B/NEDD1/DYNC1I2/VCAM1/CEP57/RALB/RAB3A/AHCYL1/RAB10/VAMP3/TCTN3/CEP97/EZR/KIF24/STXBP3/CEP192/RAB11A/SCFD2/SNAP29/SCFD1/CKAP5/MAPRE1/CEP78/TMEM67/VPS18/HAUS6/CDK5…
GOBP_POSITIVE_REGULATION_OF_LIPID_BIOSYNTHETIC_PROCESS	GOBP_POSITIVE_REGULATION_OF_LIPID_BIOSYNTHETIC_PROCESS	83	0.359929	1.45908	0.0107416	0.15747	0.145067	2942	tags=10%, list=5%, signal=9%	APOA5/APOA1/CYP7A1/PLA2G3/CGA/PPARGC1A/AVPR1A/ZBTB20
GOBP_CLATHRIN_DEPENDENT_ENDOCYTOSIS	GOBP_CLATHRIN_DEPENDENT_ENDOCYTOSIS	46	0.450218	1.59518	0.010844	0.158606	0.146114	13223	tags=52%, list=23%, signal=40%	SH3GL2/DNAJC6/FNBP1L/BMP2K/PIK3CB/CANX/SMAP1/FCHO2/WASL/CLTC/GPR107/BTBD8/AP2B1/ITSN2/DAB2/PICALM/SYT11/ITGA4/AAK1/UBQLN2/SCYL2/INPP5F/NEU3/SNAP91
GOBP_MRNA_CIS_SPLICING_VIA_SPLICEOSOME	GOBP_MRNA_CIS_SPLICING_VIA_SPLICEOSOME	35	0.474769	1.60987	0.0108759	0.158708	0.146208	3914	tags=17%, list=7%, signal=16%	RNU1-4/RNVU1-2A/RNVU1-7/RNU6ATAC/RNU4ATAC/RNVU1-17
GOBP_PIGMENTATION	GOBP_PIGMENTATION	93	0.354269	1.44268	0.0109507	0.159436	0.146878	14645	tags=53%, list=26%, signal=39%	PMEL/TYR/KIT/TYRP1/GPR143/EDA/SHROOM3/ARL6/ATP7A/BCL2/MITF/NF1/EDAR/KITLG/RAB29/ATP6AP2/AP1G1/ATRN/EDNRB/PIKFYVE/HPS3/KIF13A/MYO5A/VANGL1/BBS7/AP3B1/BLOC1S6/SLC45A2/MKKS/OCA2/BLOC1S5/SHROOM2/RAB38/ENPP1/MYO7A/BBS2/BCL2L11/ANKRD27/SPNS2/RAB27B/RAB11A/BBS4/RAB27A/GNA11/ZEB2/HPS5/LYST/AP3D1/MREG
GOBP_BILE_ACID_AND_BILE_SALT_TRANSPORT	GOBP_BILE_ACID_AND_BILE_SALT_TRANSPORT	33	0.519205	1.7436	0.0110198	0.160076	0.147468	8503	tags=45%, list=15%, signal=39%	NR0B2/SLCO1B1/CYP7A1/SLC10A1/AKR1C4/SLC10A2/ABCB11/SLCO1A2/AKR1C1/NCOA2/SLC10A5/SLC51B/PRKAA1/NCOA1/CEACAM1
GOMF_ALCOHOL_DEHYDROGENASE_NADPPLUS_ACTIVITY	GOMF_ALCOHOL_DEHYDROGENASE_NADPPLUS_ACTIVITY	21	0.539095	1.61206	0.0110923	0.160762	0.1481	1862	tags=14%, list=3%, signal=14%	ADH4/AKR1D1/AKR1C4
GOBP_REGULATION_OF_CARBOHYDRATE_CATABOLIC_PROCESS	GOBP_REGULATION_OF_CARBOHYDRATE_CATABOLIC_PROCESS	89	0.367114	1.50944	0.0112781	0.163085	0.15024	14271	tags=48%, list=25%, signal=36%	SLC4A1/PPARGC1A/PFKFB2/ZBTB20/PRKAA2/SLC4A4/ESRRB/ENTPD5/PPARA/FBP1/RANBP2/NUP160/NUP133/PRKAG2/NUP153/POM121/NUP205/PRKAA1/EP300/NUP155/PGAM1/NDC1/NCOR1/NUP58/TPR/P2RX7/SCARB2/NUP98/PSEN1/APP/SEH1L/ARNT/SLC25A12/PPP1R3D/PPP1CB/NUP54/IGF1/PPP1R3B/NUP88/PRKAG1/HIF1A/INSR/NUP50
GOMF_VOLTAGE_GATED_ANION_CHANNEL_ACTIVITY	GOMF_VOLTAGE_GATED_ANION_CHANNEL_ACTIVITY	17	0.654604	1.83793	0.0113212	0.163269	0.15041	13448	tags=65%, list=24%, signal=49%	CLCNKB/CLCNKA/CLCN5/CLCN3/SLC17A3/CLCN4/ANO6/VDAC2/VDAC1/VDAC3/CLCN6
GOMF_1_PHOSPHATIDYLINOSITOL_3_KINASE_ACTIVITY	GOMF_1_PHOSPHATIDYLINOSITOL_3_KINASE_ACTIVITY	10	0.747986	1.82268	0.011342	0.163269	0.15041	9056	tags=60%, list=16%, signal=50%	PIK3C2G/PIK3C2A/PIK3CA/PIK3CB/PIK3C3/ATM
GOBP_NEGATIVE_REGULATION_OF_STEROL_TRANSPORT	GOBP_NEGATIVE_REGULATION_OF_STEROL_TRANSPORT	23	0.563213	1.72979	0.0113738	0.163358	0.150491	6269	tags=26%, list=11%, signal=23%	APOC3/APOA2/EGF/ABCG8/MIR26A1/MIR128-1
GOBP_PIGMENT_BIOSYNTHETIC_PROCESS	GOBP_PIGMENT_BIOSYNTHETIC_PROCESS	57	0.408085	1.53192	0.011412	0.163497	0.15062	14932	tags=49%, list=26%, signal=36%	PMEL/TYR/TYRP1/GPR143/IREB2/APPL1/FECH/IBA57/ALAS1/RAPGEF2/SHMT1/PPAT/SLC45A2/OCA2/PGRMC1/NFE2L1/COX10/OPN3/COX15/SRRD/PRPS1/GMPS/GART/ZEB2/ALAD/FXN/SLC11A2/PAICS
GOBP_AROMATIC_AMINO_ACID_FAMILY_CATABOLIC_PROCESS	GOBP_AROMATIC_AMINO_ACID_FAMILY_CATABOLIC_PROCESS	20	0.582693	1.71574	0.0114456	0.163497	0.15062	1285	tags=10%, list=2%, signal=10%	TAT/PAH
GOBP_CELLULAR_RESPONSE_TO_OSMOTIC_STRESS	GOBP_CELLULAR_RESPONSE_TO_OSMOTIC_STRESS	39	0.452582	1.54422	0.0114605	0.163497	0.15062	14148	tags=59%, list=25%, signal=44%	AQP5/WNK3/SLC2A4/SCN2A/SLC12A6/DDX3X/PKD2/CAB39/OXSR1/EFHD1/SLC25A23/MICU1/XRCC5/TRPV4/LRRC8C/AQP1/BDKRB2/MBIP/MYLK/XRCC6/LRRC8D/ERRFI1/STK39
GOMF_IMMUNOGLOBULIN_BINDING	GOMF_IMMUNOGLOBULIN_BINDING	24	0.555342	1.72573	0.01167	0.166115	0.153032	1283	tags=12%, list=2%, signal=12%	HRG/AMBP/PIP
GOMF_ANION_CATION_SYMPORTER_ACTIVITY	GOMF_ANION_CATION_SYMPORTER_ACTIVITY	22	0.542701	1.65861	0.0117587	0.16662	0.153497	6523	tags=41%, list=11%, signal=36%	SLC12A3/SLC18A2/SLC6A2/SLC13A1/SLC6A4/SLC12A1/SLC39A8/SLC12A6/SLC12A2
GOBP_TRANSCRIPTION_BY_RNA_POLYMERASE_III	GOBP_TRANSCRIPTION_BY_RNA_POLYMERASE_III	47	0.438311	1.57415	0.011777	0.16662	0.153497	31956	tags=100%, list=56%, signal=44%	AR/RO60/GTF3C4/ICE1/BDP1/BRF2/ICE2/IVNS1ABP/DHX36/SNAPC3/GTF3C3/CHD8/MTOR/ZNF143/BRCA1/POLR3C/POLR3F/POLR3D/CRCP/GTF3C1/RPTOR/POLR3H/POLR2K/TBP/SNAPC5/GTF3C2/ZC3H8/SNAPC1/POLR3G/POLR3K/ELL/ZNF345/TENM1/GTF3C6/ZNF76/POLR3GL/BRF1/GTF3C5/PRDX5/CEBPA/SNAPC4/MAF1/POLR1C/GTF3A/NAB2/POLR2L/SNAPC2
GOBP_POLYOL_METABOLIC_PROCESS	GOBP_POLYOL_METABOLIC_PROCESS	130	0.327091	1.35555	0.0117838	0.16662	0.153497	14781	tags=50%, list=26%, signal=37%	INPP5J/CYP3A4/PLCG2/LHCGR/SLC34A1/ANGPTL3/PCK1/ASAH1/IMPA2/AVPR1B/ACER2/MOGAT1/DHFRP1/GK/NTSR1/NUDT4B/GOT1/SORD/SPTLC3/GPD2/IPPK/SNCA/PLCB1/PLCZ1/PLA2G4A/SPTLC2/PLPP3/SLC5A3/PPIP5K2/SGPP1/SYNJ1/SPTLC1/DHFR/IP6K3/FGF2/PLCD4/ASAH2/BPNT1/DGAT2/MTMR2/INPP4B/SGPP2/PLCH1/MECP2/OCRL/PTEN/PTH1R/IMPA1/PCK2/ASAH2B/INPP4A/QDPR/NUDT4/IP6K1/PLPP1/GBA/GK5/IPMK/COQ3/COQ2/PCBD2/BPNT2/PPIP5K1/MINPP1/INPP5A
GOBP_XENOBIOTIC_TRANSPORT	GOBP_XENOBIOTIC_TRANSPORT	40	0.443136	1.51901	0.0119005	0.167658	0.154453	16203	tags=57%, list=28%, signal=41%	ABCB11/ABCC4/SLC22A2/SLC47A1/ABCA8/PDZK1/SLC47A2/ABCB1/SLC17A3/SLC15A2/RALBP1/ABCG2/SLC36A1/SLC22A4/LRRC8C/OSCP1/LRRC8D/ABCC6/SLC22A1/LRRC8A/SLC6A6/GJA1/SLC22A5
GOBP_ACYLGLYCEROL_HOMEOSTASIS	GOBP_ACYLGLYCEROL_HOMEOSTASIS	39	0.45113	1.53927	0.0119099	0.167658	0.154453	439	tags=10%, list=1%, signal=10%	MIR208A/APOA5/APOC3/APOA1
GOBP_REGULATION_OF_SYSTEMIC_ARTERIAL_BLOOD_PRESSURE_BY_CIRCULATORY_RENIN_ANGIOTENSIN	GOBP_REGULATION_OF_SYSTEMIC_ARTERIAL_BLOOD_PRESSURE_BY_CIRCULATORY_RENIN_ANGIOTENSIN	18	0.593862	1.68288	0.0119439	0.167719	0.154509	13666	tags=67%, list=24%, signal=51%	CES1/ACE2/SUCNR1/F2RL1/ENPEP/ATP6AP2/AGTR2/MME/CPA3/PCSK5/CMA1/CTSG
GOBP_REGULATION_OF_LIPID_CATABOLIC_PROCESS	GOBP_REGULATION_OF_LIPID_CATABOLIC_PROCESS	60	0.413573	1.59254	0.0119668	0.167719	0.154509	8965	tags=28%, list=16%, signal=24%	APOA5/APOC3/APOA2/APOA1/AADAC/ABCB11/SORL1/PDE3B/ANGPTL3/FABP1/PPARA/PRKCE/CPT1A/IRS1/PRKAA1/GPLD1/LONP2
GOBP_ACTIN_CYTOSKELETON_REORGANIZATION	GOBP_ACTIN_CYTOSKELETON_REORGANIZATION	102	0.339913	1.42366	0.0121916	0.170495	0.157066	13433	tags=36%, list=24%, signal=28%	STAP1/NRK/KIT/NPHS2/CLDN19/THSD7A/IQGAP2/MKLN1/THSD7B/CD2AP/CDC42BPB/SEMA3E/CDC42BPA/NEDD9/TNIK/FER/NOTCH2/ATP2C1/TEK/GAB1/FARP2/RICTOR/RAP2A/DMTN/CXADR/ARAP1/EZR/TJP1/CDC42BPG/BCAS3/TRPV4/S1PR1/PAK1/NRP1/RALA/RHOA/CDC42
GOMF_ACID_THIOL_LIGASE_ACTIVITY	GOMF_ACID_THIOL_LIGASE_ACTIVITY	31	0.49475	1.63252	0.0123061	0.17172	0.158195	13508	tags=52%, list=24%, signal=39%	ACSS3/SLC27A2/ACSL1/SUCLA2/SUCLG2/ACSM3/AASDH/SUCLG1/ACSBG1/ACSL3/ACSS1/ACSL4/ACSM6/ACSM5/ACSM2B/SLC27A5
GOMF_LIGASE_ACTIVITY	GOMF_LIGASE_ACTIVITY	163	0.310865	1.38566	0.0123879	0.172436	0.158855	15578	tags=48%, list=27%, signal=35%	CPS1/ATP6V1A/ACSS3/SLC27A2/PCCA/ACSL1/LARS2/ATP5F1B/ATP5F1A/SUCLA2/SUCLG2/PCCB/RIMKLA/DARS2/IARS2/MARS2/EPRS1/ACSM3/MCCC1/GCLC/NARS2/AASDH/PARS2/SUCLG1/IARS1/MCCC2/EARS2/TTLL7/MTHFD1/ACSBG1/WARS2/ACSL3/ATP5PB/MTHFS/GCLM/LARS1/DPH6/TARS3/ADSS2/ACACB/NARS1/ACSS1/BTRC/QRSL1/ACSL4/HLCS/DARS1/ACSM6/ACSM5/TRIM25/TARS1/GATC/RARS1/TTLL11/UBA5/ACACA/GMPS/LIG4/MOCS3/RTCB/ACSM2B/UBA3/SLC27A5/GART/ASNSD1/RAR…
GOBP_TRANSPORT_ALONG_MICROTUBULE	GOBP_TRANSPORT_ALONG_MICROTUBULE	154	0.313334	1.3748	0.0124115	0.172436	0.158855	15554	tags=52%, list=27%, signal=38%	DLG2/TUB/LRPPRC/KIF1A/DYNC2H1/MAPT/PURA/TRIP11/SPG11/HSPA8/FBXW11/KIF1B/AGBL4/KIF3B/FYCO1/PCM1/HAP1/SSX2IP/WDR35/TRAK2/BBS12/OPA1/TTC30A/TNPO1/KIF13A/SYNE2/NEFL/PAFAH1B1/ARMCX3/DYNC1H1/AP3B1/BLOC1S6/APBA1/DYNLL2/TTC30B/BLOC1S5/TTC26/KIF5B/CILK1/HTT/MAP2/AP3M1/DST/TTC21B/PRKCZ/ARL8B/DYNC1I2/IFT88/RAB21/APP/KIF3A/TRAK1/LCA5/KIFAP3/ACTR10/RHOT1/COPG2/ARHGAP21/TRAF3IP1/UBB/RAB6A/RAB27B/CDC42/HNRNPU/A…
GOBP_CYTOPLASMIC_TRANSLATIONAL_INITIATION	GOBP_CYTOPLASMIC_TRANSLATIONAL_INITIATION	34	0.4755	1.61544	0.0126111	0.174273	0.160547	15842	tags=53%, list=28%, signal=38%	EIF2S3B/EIF3L/EIF4B/EIF3A/EIF5/EIF3C/DHX29/EIF4H/MTOR/EIF2S3/EIF3J/EIF3M/EIF4A2/YTHDF2/DENR/EIF3E/EIF3H/NCK1
GOBP_PROTEIN_LIPID_COMPLEX_ASSEMBLY	GOBP_PROTEIN_LIPID_COMPLEX_ASSEMBLY	34	0.47576	1.61632	0.0126111	0.174273	0.160547	1157	tags=15%, list=2%, signal=14%	APOA5/APOC3/APOA2/APOA1/SH3GL2
GOMF_HYDRO_LYASE_ACTIVITY	GOMF_HYDRO_LYASE_ACTIVITY	64	0.380293	1.46554	0.0126257	0.174273	0.160547	12116	tags=41%, list=21%, signal=32%	CYP1A2/CA10/CA2/CYP1A1/ACO2/EHHADH/HACD3/IREB2/AUH/HADHB/ACO1/HACD2/HSD17B4/CA4/ECHDC1/HADHA/ECHDC3/FH/HTD2/CA12/CA5A/CA5B/DGLUCY/CDYL/TGDS/CA1
GOBP_GLANDULAR_EPITHELIAL_CELL_DEVELOPMENT	GOBP_GLANDULAR_EPITHELIAL_CELL_DEVELOPMENT	25	0.545401	1.7094	0.0127121	0.17471	0.160949	12879	tags=44%, list=23%, signal=34%	NKX6-1/INSM1/CLOCK/PDPK1/RARB/CDH2/GSK3B/CDK6/HNF4A/RFX3/BMP5
GOBP_PROTEIN_LOCALIZATION_TO_ENDOSOME	GOBP_PROTEIN_LOCALIZATION_TO_ENDOSOME	25	0.54532	1.70914	0.0127121	0.17471	0.160949	16130	tags=72%, list=28%, signal=52%	EGF/SORL1/RDX/AKAP11/VPS35/ABHD17B/TMEM30A/ROCK2/ABHD17C/PACSIN2/EZR/TOLLIP/DTX3L/NRP1/WASHC2A/WASHC2C/MSN/ANKRD13A
GOBP_NEGATIVE_REGULATION_OF_OSSIFICATION	GOBP_NEGATIVE_REGULATION_OF_OSSIFICATION	37	0.487341	1.64086	0.0127512	0.17487	0.161097	516	tags=8%, list=1%, signal=8%	MIR208A/CALCA/AHSG
GOBP_ACID_SECRETION	GOBP_ACID_SECRETION	40	0.439642	1.50703	0.0128218	0.174918	0.161142	3079	tags=18%, list=5%, signal=17%	SLC26A7/SLC9A4/SLC10A1/CASR/CES1/ABCB11/PTGER3
GOBP_CELL_RECOGNITION	GOBP_CELL_RECOGNITION	224	-0.426682	-1.30906	0.0128299	0.174918	0.161142	13577	tags=32%, list=24%, signal=25%	CATSPER1/IGHV3-49/ROBO3/CATSPERB/TRBC2/SFTPA1/CCL19/IGHV4-59/IGHV3-35/CNTN2/IGLL1/TULP1/PRSS55/IGHV3-72/IGHA1/IGHV7-4-1/IGHV3-38/IGHV5-51/IGHV3-53/IGHV4-4/PTX3/IGHD/IGHG4/IGHV1-58/IGHV3-13/IGHV1OR15-1/IGHV1-69D/IGHA2/IGHV4-34/IGHV5-10-1/IGHV3-21/IGHV3-66/CLEC4M/IGHM/IGHV3-64D/ZP4/IGHV2-70/IGLC6/IGHV4-39/IGLC2/IGHV1-18/IGHG3/IGHG1/IGHV3-33/TEX101/ZP1/IGHG2/IGKC/MYPN/IGLC7/VSTM2L/ZPBP2/IGHV1-69/IGH…
GOBP_VACUOLAR_TRANSPORT	GOBP_VACUOLAR_TRANSPORT	152	0.315124	1.41313	0.012837	0.174918	0.161142	15118	tags=55%, list=27%, signal=41%	ATP6V0D2/SORL1/HOOK1/VPS13D/LRRK2/NCOA4/ZFYVE16/PRKN/CACNG5/HSPA8/MTM1/IGF2R/GCC2/TMEM106B/ANKFY1/M6PR/NDFIP2/EPG5/VPS13C/VPS4B/PINK1/VPS13A/VPS41/AP1G1/TRAK2/VPS35/ADRB2/PIK3R4/VTI1B/KIF13A/STAM/LAMP2/AP3B1/CHMP2B/CHMP3/NEDD4/ALS2/VTA1/CHMP5/BECN1/NDFIP1/AP3M1/SCARB2/SNX27/LEPROTL1/VPS54/ARSB/GPRASP1/VPS36/PSAP/GNPTAB/RBSN/TRAK1/SORT1/VPS37A/TGFBRAP1/CHMP1B/PCDHGA3/SLC46A3/VTI1A/LEPROT/HMGXB4/SC…
GOBP_PROSTATE_GLAND_GROWTH	GOBP_PROSTATE_GLAND_GROWTH	10	0.738911	1.80057	0.0128852	0.1752	0.161401	14048	tags=90%, list=25%, signal=68%	AR/PLAG1/PSAPL1/UBE3A/FGFR2/PSAP/PTEN/SHH/SOX9
GOBP_NEGATIVE_REGULATION_OF_PEPTIDE_HORMONE_SECRETION	GOBP_NEGATIVE_REGULATION_OF_PEPTIDE_HORMONE_SECRETION	40	0.439103	1.50518	0.0129754	0.176051	0.162185	8686	tags=38%, list=15%, signal=32%	STXBP5L/CRH/MTNR1B/ACVR1C/KCNJ11/CRHBP/PRKN/SFRP1/VSNL1/GHSR/IRS1/REST/PTPN11/KLF7/SYTL4
GOBP_CELLULAR_RESPONSE_TO_LEUCINE_STARVATION	GOBP_CELLULAR_RESPONSE_TO_LEUCINE_STARVATION	10	0.737265	1.79655	0.0130395	0.176545	0.16264	13039	tags=80%, list=23%, signal=62%	RRAGD/SESN3/IMPACT/LARS1/MTOR/EIF2AK4/GCN1/SESN1
GOBP_AEROBIC_RESPIRATION	GOBP_AEROBIC_RESPIRATION	86	0.351226	1.42176	0.0130866	0.176808	0.162882	12514	tags=42%, list=22%, signal=33%	OGDHL/NNT/DLAT/IDH3A/MTCO2P12/ACO2/CAT/DLD/IREB2/SUCLA2/SUCLG2/PDHA2/AFG1L/UQCRC2/SDHC/OGDH/SDHD/ACO1/CYCS/NDUFA4/SUCLG1/DLST/MTFR1/CS/DHTKD1/PDHA1/FH/COX10/MDH1/IDE/COX7A2L/PDHB/COX15/UQCRC1/ME2/SDHB
GOBP_CELLULAR_RESPIRATION	GOBP_CELLULAR_RESPIRATION	186	0.28352	1.31173	0.0133078	0.179141	0.165031	13252	tags=38%, list=23%, signal=29%	CYP1A2/PPARGC1A/OGDHL/NDUFC2-KCTD14/NNT/DLAT/IDH3A/MTCO2P12/ACO2/NDUFS1/CAT/DLD/IREB2/SUCLA2/PRDM16/PIK3CA/UQCRFS1/SUCLG2/PDHA2/AFG1L/ETFDH/GPD2/UQCRC2/SDHC/OGDH/SNCA/LYRM7/SDHD/ACO1/GHITM/SLC25A25/PINK1/CYCS/SLC25A13/NDUFA4/SUCLG1/DLST/MTFR1/CS/DHTKD1/COQ9/ETFA/PDHA1/FH/COX10/NDUFB5/TRAP1/MDH1/SLC25A23/NR4A3/IDE/OPN3/COX7A2L/PDHB/NDUFA5/COX15/SLC25A12/NOA1/UQCRC1/SDHAF4/ME2/NDUFS4/SDHB/IMMP2L/ND…
GOBP_CELLULAR_RESPONSE_TO_ALCOHOL	GOBP_CELLULAR_RESPONSE_TO_ALCOHOL	89	0.361888	1.48795	0.0133154	0.179141	0.165031	14012	tags=49%, list=25%, signal=37%	DEFB104B/CFTR/CYP7A1/CES1/PRKAA2/DEFB104A/ITPR2/ADCY2/GRAMD1C/CDH1/ADCY1/HMGCS1/SFRP1/LRP6/PRKCE/CYBB/KLF9/PTCH1/ADCY5/PRKAA1/UGT1A1/XRN1/GPLD1/SGK1/MIR185/CTNNB1/AKR1C2/LARP1/PTEN/FDX1/ADCY6/PPARG/CTNNA1/LANCL2/ACACA/KLF4/GNB1/CDK4/SLC23A2/GOLPH3/GLRA2/BRCA1/DAG1/GNAI1
GOBP_INTERFERON_ALPHA_PRODUCTION	GOBP_INTERFERON_ALPHA_PRODUCTION	28	0.476629	1.53768	0.0133552	0.179297	0.165175	11311	tags=50%, list=20%, signal=40%	MMP12/TLR3/HAVCR2/TLR4/CHUK/TLR7/DDX3X/TLR8/IFIH1/DHX9/HSPD1/DHX36/DDX58/SETD2
GOBP_NEGATIVE_REGULATION_OF_SUPRAMOLECULAR_FIBER_ORGANIZATION	GOBP_NEGATIVE_REGULATION_OF_SUPRAMOLECULAR_FIBER_ORGANIZATION	157	0.308139	1.3315	0.0137045	0.1836	0.16914	13212	tags=41%, list=23%, signal=31%	CTNNA2/FRMD7/INPP5J/TUBB4A/SLIT2/SCIN/MIR31/MIR138-1/SPTBN2/RDX/VIL1/CGNL1/PPP1R9A/PIK3CA/PRKN/EPS8/APC/HSPA8/ARHGAP28/GMFB/FHOD3/PFN2/DNAI3/ARFGEF1/CAPZA2/SNCA/SPTBN1/CLASP2/TAOK1/ARHGAP6/PHLDB2/ADD3/LIMA1/MTPN/CARMIL1/CAMSAP1/TTBK2/MKKS/SWAP70/MET/MAP2/CAMSAP2/WASF2/TACSTD2/SMAD4/TWF1/PIK3R1/DMTN/IAPP/PAK2/VBP1/TMOD2/ARAP1/TMOD1/APC2/TJP1/SPTAN1/ATXN7/CRACD/TMOD3/S1PR1/LDLR/PRKCD/SVIL
GOBP_VASCULAR_TRANSPORT	GOBP_VASCULAR_TRANSPORT	88	0.346984	1.41028	0.013752	0.18385	0.16937	12337	tags=39%, list=22%, signal=30%	SLC38A3/SLC16A7/SLC22A8/LRP2/AVPR1A/ABCC4/SLC4A4/SLC16A12/SLC2A4/SLC5A1/ATP8A1/SLC22A2/AVPR1B/LEPR/SLC2A13/SLC7A8/ABCB1/SLC1A1/SLC12A2/SLC38A1/SLC15A2/SLC44A1/SLC5A3/ABCG2/SLC1A2/SLC29A2/SLC7A1/SLC1A3/TFRC/SLC16A2/CD36/SLC6A20/SLCO2B1/ATP2B4
GOBP_NEGATIVE_REGULATION_OF_MYOBLAST_DIFFERENTIATION	GOBP_NEGATIVE_REGULATION_OF_MYOBLAST_DIFFERENTIATION	24	0.541966	1.68416	0.0141775	0.18868	0.173819	1143	tags=8%, list=2%, signal=8%	NMRK2/SOSTDC1
GOBP_MODIFIED_AMINO_ACID_TRANSPORT	GOBP_MODIFIED_AMINO_ACID_TRANSPORT	29	0.516827	1.67126	0.0142007	0.18868	0.173819	16203	tags=48%, list=28%, signal=35%	LRP2/SLC16A12/FOLR3/SLC19A2/PDZK1/SLC7A9/SLC22A4/SLC6A20/SLC46A1/SLC25A20/SLC38A2/SLC9A3R1/GJA1/SLC22A5
GOMF_POLY_A_SPECIFIC_RIBONUCLEASE_ACTIVITY	GOMF_POLY_A_SPECIFIC_RIBONUCLEASE_ACTIVITY	13	0.679788	1.77974	0.014202	0.18868	0.173819	14602	tags=62%, list=26%, signal=46%	CNOT1/CNOT6L/PDE12/PNLDC1/CNOT7/CNOT6/CNOT8/NOCT
GOBP_INTRACELLULAR_ESTROGEN_RECEPTOR_SIGNALING_PATHWAY	GOBP_INTRACELLULAR_ESTROGEN_RECEPTOR_SIGNALING_PATHWAY	56	0.405206	1.5266	0.0142965	0.189172	0.174273	14230	tags=46%, list=25%, signal=35%	DEFA1/DEFA3/SRARP/CNOT1/AR/ZNF366/NCOA4/CYP7B1/UFSP2/MED1/UFL1/GPAM/LATS1/RBFOX2/YAP1/PARP1/UBA5/TRIP4/PAK1/STRN3/ARID1A/UFM1/BRCA1/VPS18/PPARGC1B/VPS11
GOMF_SNRNA_BINDING	GOMF_SNRNA_BINDING	52	0.427031	1.582	0.0143217	0.189172	0.174273	8741	tags=23%, list=15%, signal=20%	RNU4-2/RNU4-1/RNU6ATAC/RNU4ATAC/RNU6-7/RO60/SNRPD3/DDX21/RBM7/PRPF8/CCNT1/GEMIN5
GOMF_PHOSPHATIDYLINOSITOL_PHOSPHATE_KINASE_ACTIVITY	GOMF_PHOSPHATIDYLINOSITOL_PHOSPHATE_KINASE_ACTIVITY	16	0.609293	1.69967	0.0143281	0.189172	0.174273	9756	tags=44%, list=17%, signal=36%	PIK3C2G/PIK3C2A/PIK3CA/PIP5K1B/PIK3CB/PIKFYVE/PIP4K2C
GOBP_PYRIDINE_CONTAINING_COMPOUND_METABOLIC_PROCESS	GOBP_PYRIDINE_CONTAINING_COMPOUND_METABOLIC_PROCESS	41	0.454535	1.57829	0.0144049	0.189793	0.174845	4674	tags=15%, list=8%, signal=13%	NMRK2/NMNAT2/SLC22A13/SLC5A8/NUDT12/AOX1
GOMF_GTP_DEPENDENT_PROTEIN_BINDING	GOMF_GTP_DEPENDENT_PROTEIN_BINDING	22	0.529832	1.61928	0.0147215	0.193565	0.178319	17785	tags=64%, list=31%, signal=44%	UNC13B/AP1G1/AP3B1/RAB38/RAB3D/RAB3A/EEA1/RAPGEF5/CDC42/MRAS/RAB5B/DNM1L/GCH1/RAB32
GOBP_DEVELOPMENTAL_PIGMENTATION	GOBP_DEVELOPMENTAL_PIGMENTATION	44	0.448938	1.58973	0.014818	0.194187	0.178893	14645	tags=55%, list=26%, signal=41%	TYR/KIT/TYRP1/GPR143/BCL2/MITF/KITLG/ATP6AP2/AP1G1/EDNRB/BLOC1S6/SLC45A2/OCA2/BLOC1S5/RAB38/ENPP1/BCL2L11/ANKRD27/SPNS2/RAB27A/GNA11/ZEB2/AP3D1/MREG
GOCC_U4_SNRNP	GOCC_U4_SNRNP	13	0.676859	1.77207	0.0148297	0.194187	0.178893	403	tags=15%, list=1%, signal=15%	RNU4-2/RNU4-1
GOCC_PLATELET_DENSE_GRANULE	GOCC_PLATELET_DENSE_GRANULE	21	0.529991	1.58483	0.0149424	0.195244	0.179867	8714	tags=43%, list=15%, signal=36%	APOH/SPP2/ABCC4/SELENOP/SERPINA4/ITPR1/ITIH3/TIMP3/LAMP2
GOBP_CELLULAR_AMINO_ACID_BIOSYNTHETIC_PROCESS	GOBP_CELLULAR_AMINO_ACID_BIOSYNTHETIC_PROCESS	77	0.377415	1.49935	0.0149717	0.195244	0.179867	14279	tags=45%, list=25%, signal=34%	OTC/AGXT/PAH/NAT8L/DHFRP1/AGXT2/GOT1/GLUD2/RIMKLA/BHMT/SHMT1/SERINC5/AASDHPPT/MTHFD1/DHFR/CTH/DHFR2/MTRR/GLUD1/MTR/GOT2/GLS/NAGS/OAT/DPYD/SLC25A12/UPB1/ILVBL/MTAP/SERINC3/PSPH/ENOPH1/APIP/ASNSD1/PHGDH
GOBP_PYRIDINE_CONTAINING_COMPOUND_BIOSYNTHETIC_PROCESS	GOBP_PYRIDINE_CONTAINING_COMPOUND_BIOSYNTHETIC_PROCESS	35	0.461979	1.5665	0.0154546	0.201131	0.18529	4259	tags=14%, list=7%, signal=13%	NMRK2/NMNAT2/SLC22A13/SLC5A8/NUDT12
GOMF_PHOSPHATIDYLINOSITOL_KINASE_ACTIVITY	GOMF_PHOSPHATIDYLINOSITOL_KINASE_ACTIVITY	17	0.641668	1.80161	0.0155337	0.20172	0.185832	9056	tags=53%, list=16%, signal=45%	PIK3C2G/PIK3C2A/PIK3CA/PIK3CB/PIK3C3/PIKFYVE/PI4KA/PI4K2B/ATM
GOMF_OXIDOREDUCTASE_ACTIVITY_ACTING_ON_THE_CH_CH_GROUP_OF_DONORS_NAD_OR_NADP_AS_ACCEPTOR	GOMF_OXIDOREDUCTASE_ACTIVITY_ACTING_ON_THE_CH_CH_GROUP_OF_DONORS_NAD_OR_NADP_AS_ACCEPTOR	26	0.494339	1.56447	0.0155883	0.20172	0.185832	16170	tags=62%, list=28%, signal=44%	AKR1D1/AKR1C1/SRD5A2/DHCR7/PTGR1/AKR1C2/DPYD/LBR/ZADH2/PECR/DHDH/PTGR2/BDH2/DECR1/SRD5A1/TM7SF2
GOBP_POSITIVE_REGULATION_OF_CELLULAR_RESPONSE_TO_TRANSFORMING_GROWTH_FACTOR_BETA_STIMULUS	GOBP_POSITIVE_REGULATION_OF_CELLULAR_RESPONSE_TO_TRANSFORMING_GROWTH_FACTOR_BETA_STIMULUS	28	0.468292	1.51078	0.0155997	0.20172	0.185832	12506	tags=50%, list=22%, signal=39%	HIPK2/MIR30B/GOT1/RNF111/FERMT1/EP300/TGFBR3/THBS1/CITED2/DAB2/SMAD4/CREBBP/ADAM17/HSP90AB1
GOBP_REGULATION_OF_B_CELL_ACTIVATION	GOBP_REGULATION_OF_B_CELL_ACTIVATION	185	-0.436739	-1.32951	0.0156264	0.20172	0.185832	14557	tags=32%, list=26%, signal=24%	IGHV4-61/TRBC1/IL21/IL13/TBC1D10C/TNFRSF4/IGHV3-49/ADA/TRBC2/IGHV4-59/IGHV3-35/IGLL1/IL4/TNFRSF13C/IGHV3-72/IGHA1/IGHV7-4-1/IGHV3-38/IGHV5-51/IGHV3-53/IGHV4-4/IGHD/IGHG4/IGHV1-58/IGHV3-13/IGHV1OR15-1/IGHV1-69D/TNFRSF13B/IGHA2/IGHV4-34/IGHV5-10-1/IGHV3-21/IGHV3-66/IGHM/IGHV3-64D/IGHV2-70/IGLC6/IGHV4-39/IGLC2/IGHV1-18/IGHG3/IGHG1/IGHV3-33/BLK/IL6/IGHG2/IGKC/IGLC7/MZB1/IGHV1-69/IGHV6-1/CD19/IGLL5/IG…
GOMF_SULFUR_COMPOUND_TRANSMEMBRANE_TRANSPORTER_ACTIVITY	GOMF_SULFUR_COMPOUND_TRANSMEMBRANE_TRANSPORTER_ACTIVITY	48	0.414736	1.47377	0.0157321	0.202596	0.186639	8673	tags=23%, list=15%, signal=19%	SLC26A7/SLC26A3/SLC26A4/ABCC4/SLC13A1/SLC19A2/SLC25A30/SLC1A1/SLC7A9/SLC19A3/ABCG2
GOMF_VOLTAGE_GATED_CHLORIDE_CHANNEL_ACTIVITY	GOMF_VOLTAGE_GATED_CHLORIDE_CHANNEL_ACTIVITY	11	0.709157	1.77753	0.0157578	0.202596	0.186639	8405	tags=55%, list=15%, signal=46%	CLCNKB/CLCNKA/CLCN5/CLCN3/CLCN4/ANO6
GOBP_THYROID_HORMONE_TRANSPORT	GOBP_THYROID_HORMONE_TRANSPORT	10	0.728249	1.77458	0.0159729	0.204948	0.188806	5385	tags=40%, list=9%, signal=36%	SERPINA7/TTR/SLC16A10/SLC7A8
GOBP_GLUTAMATE_METABOLIC_PROCESS	GOBP_GLUTAMATE_METABOLIC_PROCESS	33	0.50442	1.69395	0.016097	0.206126	0.189891	11722	tags=55%, list=21%, signal=43%	TAT/HAL/ALDH5A1/GOT1/GLUD2/AMDHD1/GCLC/ALDH4A1/MTHFS/GCLM/GLUD1/GOT2/GLS/DGLUCY/NAGS/OAT/SLC25A12/PRODH
GOBP_NEGATIVE_REGULATION_OF_STRESS_ACTIVATED_PROTEIN_KINASE_SIGNALING_CASCADE	GOBP_NEGATIVE_REGULATION_OF_STRESS_ACTIVATED_PROTEIN_KINASE_SIGNALING_CASCADE	47	0.423944	1.52255	0.0162634	0.20784	0.19147	12320	tags=47%, list=22%, signal=37%	AMBP/MIR138-1/PRKN/SFRP1/F2RL1/FKTN/HIPK3/AIDA/PINK1/MAPK8IP1/DUSP3/ITCH/MECOM/ZMYND11/FOXO1/NCOR1/DLG1/TAOK3/PDCD4/ZNF675/EZR/DNAJA1
GOBP_COENZYME_A_METABOLIC_PROCESS	GOBP_COENZYME_A_METABOLIC_PROCESS	15	0.640889	1.77648	0.0163825	0.20818	0.191784	10515	tags=53%, list=18%, signal=43%	PANK1/ACAT1/PANK3/NUDT7/HMGCR/ACLY/MCCC2/CROT
GOBP_LIPOSACCHARIDE_METABOLIC_PROCESS	GOBP_LIPOSACCHARIDE_METABOLIC_PROCESS	110	0.330055	1.37168	0.0163879	0.20818	0.191784	13799	tags=49%, list=24%, signal=37%	CWH43/KIT/ST8SIA5/UGT8/GBA3/FA2H/ASAH1/ST3GAL4/ST8SIA6/ITGB8/B4GALT6/B4GALNT1/PGAP4/B3GALNT1/PGAP1/PIGO/GALC/ST8SIA4/PRKAA1/PIGH/ESYT3/GPLD1/ST3GAL6/ST6GALNAC3/STS/ESYT1/PIGN/PIGS/SCCPDH/ESYT2/MPPE1/PSAP/PIGK/PIGB/GLB1/PIGA/B4GALT5/PIGF/PIGV/ST3GAL1/SUMF2/FUCA1/CLN6/B3GNT5/NEU3/CERK/HEXB/PRKCD/SUMF1/PIGW/GM2A/ENPP7/PIGP/GBA
GOBP_REGULATION_OF_EARLY_ENDOSOME_TO_LATE_ENDOSOME_TRANSPORT	GOBP_REGULATION_OF_EARLY_ENDOSOME_TO_LATE_ENDOSOME_TRANSPORT	18	0.580548	1.64515	0.016388	0.20818	0.191784	15532	tags=78%, list=27%, signal=57%	RDX/MAPK1/DNAJC13/CHMP3/DAB2/MTMR2/RAB21/EZR/SNX12/DENND10/VPS11/MAP2K1/MSN/SNX3
GOBP_POSITIVE_REGULATION_OF_ENDOCYTOSIS	GOBP_POSITIVE_REGULATION_OF_ENDOCYTOSIS	97	0.333247	1.3758	0.0164829	0.208326	0.191918	8941	tags=24%, list=16%, signal=20%	APOA5/STAP1/VTN/PLCG2/EGF/NEDD4L/LRRK2/APPL1/F2RL1/GPC3/ANKFY1/MIB1/SNCA/WASL/ITGA2/ANGPT1/NLGN1/CBLL1/TBC1D5/ATAD1/ANO6/AP2B1/APPL2
GOCC_INTRINSIC_COMPONENT_OF_MITOCHONDRIAL_MEMBRANE	GOCC_INTRINSIC_COMPONENT_OF_MITOCHONDRIAL_MEMBRANE	86	0.345606	1.39901	0.0164949	0.208326	0.191918	11965	tags=38%, list=21%, signal=30%	SPIRE1/APOOL/L2HGDH/AFG3L2/SLC25A4/SFXN2/ETFDH/TOMM20/MPC1/CPT1A/GHITM/PINK1/ABCB10/HSPA9/DNAJC11/MTX3/MFN2/ARMCX3/SCO1/IMMT/SFXN1/CHCHD3/MUL1/SLC25A3/COX11/TIMM17A/MFN1/MCUR1/MICU1/GDAP1/RHOT1/COX18/TOMM20L
GOBP_GLYCOLYTIC_PROCESS_THROUGH_FRUCTOSE_6_PHOSPHATE	GOBP_GLYCOLYTIC_PROCESS_THROUGH_FRUCTOSE_6_PHOSPHATE	28	0.464988	1.50012	0.0164975	0.208326	0.191918	14389	tags=43%, list=25%, signal=32%	SLC4A1/PFKM/PKLR/PGK1/BPGM/PGAM1/ALDOB/PFKP/FOXK1/PGM2L1/ENO3/ALDOA
GOMF_CATION_CHLORIDE_SYMPORTER_ACTIVITY	GOMF_CATION_CHLORIDE_SYMPORTER_ACTIVITY	17	0.637733	1.79057	0.0167623	0.211252	0.194613	6523	tags=41%, list=11%, signal=36%	SLC12A3/SLC18A2/SLC6A2/SLC6A4/SLC12A1/SLC12A6/SLC12A2
GOBP_NEGATIVE_REGULATION_OF_VASCULAR_PERMEABILITY	GOBP_NEGATIVE_REGULATION_OF_VASCULAR_PERMEABILITY	16	0.60129	1.67734	0.0168418	0.211834	0.19515	8503	tags=50%, list=15%, signal=43%	SH3GL2/SLIT2/AKAP12/DDAH1/ARHGAP35/PTPRJ/ANGPT1/CEACAM1
GOBP_BIOLOGICAL_PROCESS_INVOLVED_IN_INTERACTION_WITH_SYMBIONT	GOBP_BIOLOGICAL_PROCESS_INVOLVED_IN_INTERACTION_WITH_SYMBIONT	90	0.336183	1.38801	0.0170447	0.213342	0.196539	5978	tags=14%, list=11%, signal=13%	CFHR5/HRG/CFHR2/DEFA1/ARG1/CFHR1/REG3G/LRRC19/PRKN/F2RL1/HSPA8/NAPEPLD/IGF2R
GOMF_ANION_SODIUM_SYMPORTER_ACTIVITY	GOMF_ANION_SODIUM_SYMPORTER_ACTIVITY	14	0.633505	1.69535	0.0171138	0.213342	0.196539	6523	tags=50%, list=11%, signal=44%	SLC12A3/SLC18A2/SLC6A2/SLC13A1/SLC6A4/SLC12A1/SLC12A2
GOMF_EFFLUX_TRANSMEMBRANE_TRANSPORTER_ACTIVITY	GOMF_EFFLUX_TRANSMEMBRANE_TRANSPORTER_ACTIVITY	14	0.630633	1.68766	0.0171138	0.213342	0.196539	8673	tags=50%, list=15%, signal=42%	ABCB5/ABCC4/SLC22A2/ABCB1/SLC17A3/XPR1/ABCG2
GOBP_NEGATIVE_REGULATION_OF_LIPID_TRANSPORT	GOBP_NEGATIVE_REGULATION_OF_LIPID_TRANSPORT	44	0.441347	1.56285	0.0171289	0.213342	0.196539	9422	tags=30%, list=17%, signal=25%	APOC3/APOA2/EGF/ABCG8/MIR26A1/MIR128-1/ITGAV/PTPN11/AGTR2/THBS1/MIR30C1/SREBF2/MIR148A
GOCC_MEDIATOR_COMPLEX	GOCC_MEDIATOR_COMPLEX	40	0.428336	1.46827	0.0171289	0.213342	0.196539	16153	tags=52%, list=28%, signal=38%	CDK19/MED13/MED1/MED12L/MED13L/MED21/CCNC/MED14/MED23/CDK6/BCLAF1/MED28/THRAP3/CDK4/MED22/MED9/PPARGC1B/BCLAF3/CDK8/MED20/MED7
GOMF_DOUBLE_STRANDED_RNA_BINDING	GOMF_DOUBLE_STRANDED_RNA_BINDING	76	0.357945	1.41459	0.017275	0.214742	0.197828	14622	tags=50%, list=26%, signal=37%	ADARB2/TLR3/DDX60/EIF4B/STRBP/RC3H2/MRPL44/CLTC/MYH4/DDX21/TLR7/DDX3X/TLR8/IFIH1/ZFR/DHX9/STAU2/DHX15/EIF2AK2/HSPD1/DICER1/AGO1/DHX36/MTDH/DDX58/FMR1/RC3H1/EIF4H/TFRC/ADAR/PRKRA/HSP90AB1/STAU1/HNRNPU/OAS3/DROSHA/AGO2/LSM14A
GOBP_POSITIVE_REGULATION_OF_LIPID_TRANSPORT	GOBP_POSITIVE_REGULATION_OF_LIPID_TRANSPORT	85	0.338378	1.36791	0.0174345	0.216303	0.199266	10848	tags=33%, list=19%, signal=27%	APOA1/PON1/CRH/PLA2G3/CES1/AVPR1A/ACSL1/GALR1/ATP8A1/AVPR1B/ABCA8/NTSR1/LPCAT3/STXBP1/SLC12A2/CYP4A11/PLA2G4A/PTCH1/SIRT1/ABCA1/TMEM30A/TMF1/ITGB1/SCP2/MAP2K6/PSEN1/ABCA12/RAB3GAP1
GOBP_REGULATION_OF_PROTEIN_POLYUBIQUITINATION	GOBP_REGULATION_OF_PROTEIN_POLYUBIQUITINATION	25	0.530208	1.66178	0.0175166	0.216566	0.199509	11823	tags=56%, list=21%, signal=44%	SPSB4/MIR138-1/PRKN/TRIM44/TRIP12/UBR5/DDX3X/OTUB2/SASH1/MARCHF7/BIRC2/RNF40/XIAP/PLAA
GOBP_CELLULAR_RESPONSE_TO_LEUCINE	GOBP_CELLULAR_RESPONSE_TO_LEUCINE	10	0.72493	1.7665	0.0175236	0.216566	0.199509	13039	tags=70%, list=23%, signal=54%	RRAGD/UBR1/SESN3/LARS1/UBR2/MTOR/SESN1
GOCC_PERICENTRIOLAR_MATERIAL	GOCC_PERICENTRIOLAR_MATERIAL	20	0.560831	1.65137	0.017587	0.216929	0.199844	15034	tags=70%, list=26%, signal=52%	NEK1/PCM1/TNKS/TNKS2/CEP85/TCP1/NEDD1/BBS9/DYRK3/NIN/CEP192/BBS4/CDK5RAP2/HOOK3
GOBP_CELLULAR_RESPONSE_TO_LIPOPROTEIN_PARTICLE_STIMULUS	GOBP_CELLULAR_RESPONSE_TO_LIPOPROTEIN_PARTICLE_STIMULUS	32	0.484293	1.60626	0.0176867	0.217738	0.200588	13671	tags=59%, list=24%, signal=45%	CASR/CES1/ADTRP/HMGCS1/TLR4/CDH13/CD9/ABCA1/SREBF2/ITGB1/SYK/CD36/ADAM17/NPC1/PPARG/SOCS5/LDLR/MIA3/LPL
GOBP_AMINO_ACID_BETAINE_METABOLIC_PROCESS	GOBP_AMINO_ACID_BETAINE_METABOLIC_PROCESS	17	0.631591	1.77332	0.0178155	0.21806	0.200885	10982	tags=82%, list=19%, signal=66%	ACADM/DMGDH/CHDH/CPT2/TMLHE/CPT1A/BHMT/ALDH9A1/SHMT1/BBOX1/ACADL/CROT/CRAT/SLC22A4
GOBP_POSITIVE_REGULATION_OF_MITOCHONDRIAL_FISSION	GOBP_POSITIVE_REGULATION_OF_MITOCHONDRIAL_FISSION	17	0.629807	1.76831	0.0178155	0.21806	0.200885	10376	tags=53%, list=18%, signal=43%	SPIRE1/PRKN/DDHD2/PINK1/MIEF1/VPS35/KDR/MUL1/MARCHF5
GOBP_STEROID_ESTERIFICATION	GOBP_STEROID_ESTERIFICATION	17	0.634536	1.78159	0.0178155	0.21806	0.200885	3077	tags=24%, list=5%, signal=22%	APOA5/APOA2/APOA1/ACAT1
GOBP_CELL_CELL_JUNCTION_ASSEMBLY	GOBP_CELL_CELL_JUNCTION_ASSEMBLY	145	0.293682	1.26825	0.0178659	0.218258	0.201067	12768	tags=40%, list=22%, signal=31%	CLDN8/CDH7/GRHL2/MPP7/OCLN/CDH20/CLDN19/CDH19/UGT8/CDH12/CLDN16/CDH9/MARVELD2/ACE2/PATJ/MPP5/FRMPD2/DSG1/TLN2/APC/FZD5/PTPRO/STRN/PKP2/CRB3/ROCK1/CLDN10/GJB1/HIPK1/CLDN17/CD9/PKN2/AFDN/CTNND2/PDCD6IP/WNT11/PKP4/PARD3/HEG1/CDH2/PARD6B/DLG1/CTNNB1/PRKCI/PRKCA/MTDH/CLDN20/ROCK2/CLDN4/PAK2/EPB41L3/POF1B/TJP1/JAM3/CTNNA1/DCHS1/CLDN2/TRPV4
GOBP_AV_NODE_CELL_TO_BUNDLE_OF_HIS_CELL_COMMUNICATION	GOBP_AV_NODE_CELL_TO_BUNDLE_OF_HIS_CELL_COMMUNICATION	12	0.670175	1.71189	0.017994	0.218984	0.201736	14	tags=8%, list=0%, signal=8%	MIR208A
GOMF_ALDITOL_NADPPLUS_1_OXIDOREDUCTASE_ACTIVITY	GOMF_ALDITOL_NADPPLUS_1_OXIDOREDUCTASE_ACTIVITY	12	0.670278	1.71215	0.017994	0.218984	0.201736	5126	tags=33%, list=9%, signal=30%	ADH4/AKR1D1/AKR1C4/AKR1C1
GOCC_TRANSLATION_PREINITIATION_COMPLEX	GOCC_TRANSLATION_PREINITIATION_COMPLEX	18	0.574441	1.62785	0.0180546	0.219136	0.201876	15835	tags=56%, list=28%, signal=40%	EIF3L/EIF3A/EIF3C/DHX29/EIF1B/EIF2S1/EIF3J/EIF3M/EIF3E/EIF3H
GOBP_REGULATION_OF_MITOCHONDRIAL_FUSION	GOBP_REGULATION_OF_MITOCHONDRIAL_FUSION	13	0.656509	1.71879	0.018136	0.219136	0.201876	16773	tags=85%, list=30%, signal=60%	PRKN/HUWE1/OPA1/MUL1/TFRC/OMA1/PLD6/ZDHHC6/VAT1/BNIP3/DNM1L
GOBP_AMMONIUM_TRANSPORT	GOBP_AMMONIUM_TRANSPORT	10	0.723226	1.76235	0.0181439	0.219136	0.201876	6523	tags=40%, list=11%, signal=35%	RHCG/RHBG/SLC12A6/SLC12A2
GOMF_AMMONIUM_TRANSMEMBRANE_TRANSPORTER_ACTIVITY	GOMF_AMMONIUM_TRANSMEMBRANE_TRANSPORTER_ACTIVITY	10	0.723226	1.76235	0.0181439	0.219136	0.201876	6523	tags=40%, list=11%, signal=35%	RHCG/RHBG/SLC12A6/SLC12A2
GOMF_POTASSIUM_CHANNEL_REGULATOR_ACTIVITY	GOMF_POTASSIUM_CHANNEL_REGULATOR_ACTIVITY	53	0.402451	1.49141	0.0183316	0.220984	0.203579	10456	tags=42%, list=18%, signal=34%	LRRC52/KCNE5/DPP10/DPP6/KCNIP1/WNK3/NEDD4L/KCNE1B/KCNV1/AKAP9/AMIGO1/KCNIP4/RASA1/ADRB2/SLC5A3/ARPP19/SGK1/LRRC55/CHP1/DLG1/WNK1/PRKCZ
GOBP_RETINA_LAYER_FORMATION	GOBP_RETINA_LAYER_FORMATION	25	0.527106	1.65206	0.0185176	0.222564	0.205035	10682	tags=52%, list=19%, signal=42%	CALB1/LHX1/PROM1/HIPK2/RS1/TFAP2B/SLC1A1/TSPAN12/HIPK1/TOPORS/CRB1/PTPRM/IGFN1
GOBP_CELLULAR_ALDEHYDE_METABOLIC_PROCESS	GOBP_CELLULAR_ALDEHYDE_METABOLIC_PROCESS	62	0.377722	1.46154	0.0185325	0.222564	0.205035	15843	tags=53%, list=28%, signal=38%	ADH4/AGXT/ALDH1A2/AKR1C1/AGXT2/ALDH8A1/ALDH3A2/KHK/REST/ALDH9A1/ALDH4A1/ADH5/RDH10/ALDOB/GOT2/GLO1/AKR7A3/BCO1/ALDH1A1/BMP5/GRHPR/AKR7A2/RDH11/ALDH7A1/IDH2/KDM3A/BMP2/ESD/DHRS13/HOGA1/BMP6/ALDH1A3/IDH1
GOBP_ERBB_SIGNALING_PATHWAY	GOBP_ERBB_SIGNALING_PATHWAY	143	0.309814	1.33505	0.0186485	0.223	0.205436	14134	tags=45%, list=25%, signal=34%	SH3GL2/FAM83B/EGF/NEURL1/PTPN3/ERBB4/GAREM1/PIGR/NRG1/VIL1/CUL5/PIK3C2A/PIK3CA/CPNE3/BTC/NRG2/MAPK1/KIF16B/STAM2/PTPRJ/HAP1/FER/DUSP3/EGFR/CDH13/BRAF/PTPN11/GAB1/LGMN/PDPK1/ERBB2/CEACAM1/STAM/IQGAP1/SNX6/SOS1/REPS2/NRG4/ERBIN/SOCS4/TGFA/HSP90AA1/CBL/PIK3R1/PSEN1/PRKCA/BCAR3/EPS15/ARAP1/RPS6KA5/ADAM17/SOCS5/PTPRR/SPRY2/NEU3/RTN4/TSG101/CDC42/SNX5/PTK2/DAB2IP/ITGA1/SOX9/ERRFI1
GOBP_REGULATION_OF_ORGANELLE_ASSEMBLY	GOBP_REGULATION_OF_ORGANELLE_ASSEMBLY	185	0.288773	1.33754	0.0186721	0.223	0.205436	14920	tags=47%, list=26%, signal=35%	LRRTM1/TBC1D14/GRID2/PRKAA2/CNOT1/SMCR8/CDKL1/DCDC2/RDX/LRRK2/MTM1/CDKL5/PTPRD/G3BP2/RAB3GAP2/ARHGAP35/ADAMTS16/VPS4B/CNOT6L/PINK1/HAP1/LRRTM2/CBLN1/ALMS1/MNS1/CEP295/PIKFYVE/PRKAA1/KAT2B/SYNE2/STAM/CEP120/PDCD6IP/DYNC1H1/CHMP2B/CCP110/TPR/CHMP5/BECN1/HTT/PIP4K2C/TAPT1/SMAD4/GPSM2/UBQLN2/IFT88/ATMIN/MAPK9/RALB/RAB3GAP1/CHMP1B/CEP97/CNOT6/NPM1/EZR/TRIM37/G3BP1/YAP1/SEC22B/VDAC3/FEZ2/CHMP4C/CYLD/SH…
GOBP_ACTIN_FILAMENT_BUNDLE_ORGANIZATION	GOBP_ACTIN_FILAMENT_BUNDLE_ORGANIZATION	155	0.303599	1.33711	0.0186737	0.223	0.205436	15173	tags=46%, list=27%, signal=34%	APOA1/FRMD7/PPM1E/PFN3/MIR138-1/SPIRE1/PLS1/RDX/VIL1/CGNL1/AIF1L/LIMCH1/PPP1R9A/PRKN/SFRP1/EPS8/ARHGAP28/FHDC1/CUL3/PFN2/CLASP2/NEDD9/ARHGAP6/PHLDB2/ALMS1/ROCK1/LIMA1/CARMIL1/WNT11/MKKS/SWAP70/MET/SHTN1/WASF2/TACSTD2/FAM171A1/PIK3R1/BAG4/DMTN/LPAR1/ROCK2/PAK2/MTOR/ARAP1/EZR/TJP1/NOX4/ARRB1/TPM1/S1PR1/PAK1/NRP1/RHOA/CDC42/TGFBR1/RFLNB/USH1C/DLC1/SORBS1/PLS3/PPFIA1/SDC4/ADD1/FAM107A/SMAD3/CLASP1/TN…
GOBP_POSITIVE_REGULATION_OF_CELL_GROWTH_INVOLVED_IN_CARDIAC_MUSCLE_CELL_DEVELOPMENT	GOBP_POSITIVE_REGULATION_OF_CELL_GROWTH_INVOLVED_IN_CARDIAC_MUSCLE_CELL_DEVELOPMENT	10	0.721007	1.75694	0.0187642	0.223662	0.206046	14	tags=10%, list=0%, signal=10%	MIR208A
GOMF_BITTER_TASTE_RECEPTOR_ACTIVITY	GOMF_BITTER_TASTE_RECEPTOR_ACTIVITY	20	0.557607	1.64187	0.0188898	0.224683	0.206986	8456	tags=40%, list=15%, signal=34%	TAS2R30/TAS2R13/TAS2R3/TAS2R50/TAS2R46/TAS2R40/TAS2R43/TAS2R16
GOBP_NEGATIVE_REGULATION_OF_MYELOID_CELL_DIFFERENTIATION	GOBP_NEGATIVE_REGULATION_OF_MYELOID_CELL_DIFFERENTIATION	92	0.338779	1.39302	0.0189203	0.224683	0.206986	13009	tags=34%, list=23%, signal=26%	H4C3/H4C6/H4C2/H4C4/H4C13/H4C1/TLR3/HOXA7/SFRP1/CDC73/GPR137B/MIR125B1/CTR9/TLR4/HSPA9/CEACAM1/KLF13/ZBTB16/TOB2/INHA/CDK6/PIK3R1/GABPA/ZNF675/CUL4A/NCAPG2/STAT5B/TCTA/HOXB8/H4-16/UBASH3B
GOBP_CALCIUM_DEPENDENT_CELL_CELL_ADHESION_VIA_PLASMA_MEMBRANE_CELL_ADHESION_MOLECULES	GOBP_CALCIUM_DEPENDENT_CELL_CELL_ADHESION_VIA_PLASMA_MEMBRANE_CELL_ADHESION_MOLECULES	43	0.415994	1.4629	0.0189885	0.225073	0.207346	12691	tags=49%, list=22%, signal=38%	CDH7/CDH17/CDH20/CDH19/CDH12/CDH9/DSG1/CDH16/PCDHGC3/PCDHGB4/NLGN1/CDH13/ATP2C1/PCDHB11/CDH2/PCDHB3/PCDHB5/KIFAP3/AJUBA/DCHS1/PCDHB13
GOMF_CARBOXYLIC_ACID_BINDING	GOMF_CARBOXYLIC_ACID_BINDING	184	0.282843	1.31415	0.0191965	0.227116	0.209228	12398	tags=36%, list=22%, signal=28%	ALB/TAT/OTC/AGXT/CASR/AKR1C4/AFM/GPR143/GNMT/CPS1/SERPINA5/FOLR3/PCCA/PCK1/UGT1A9/EGLN1/MAG/DHFRP1/FABP1/AKR1C1/DBT/GOT1/PHYH/GLUD2/DDAH1/UBR1/SLC1A1/NAPEPLD/DDC/IGF2R/SESN3/GLRB/MCCC1/FTCDNL1/GCLC/SHMT1/ST8SIA4/ADH5/UGT1A1/STX3/VDR/DHFR/MTHFS/UBR2/ACOX2/ACOX1/EPDR1/SIGLEC7/GLUD1/SCP2/ACACB/GOT2/PSAP/NAGS/PAM/TYMS/AKR1C2/FABP2/HLCS/P4HA1/GLDC/FABP3/SLC46A1/PPARG/RARS1/HNF4A
GOBP_CELLULAR_PIGMENTATION	GOBP_CELLULAR_PIGMENTATION	52	0.417612	1.54711	0.0192511	0.227342	0.209436	14645	tags=56%, list=26%, signal=41%	PMEL/TYRP1/GPR143/SHROOM3/ARL6/BCL2/RAB29/AP1G1/PIKFYVE/KIF13A/MYO5A/BBS7/AP3B1/BLOC1S6/MKKS/BLOC1S5/SHROOM2/RAB38/MYO7A/BBS2/ANKRD27/RAB27B/RAB11A/BBS4/RAB27A/ZEB2/LYST/AP3D1/MREG
GOBP_CHOLESTEROL_STORAGE	GOBP_CHOLESTEROL_STORAGE	18	0.569586	1.61409	0.0195397	0.230322	0.212182	13671	tags=67%, list=24%, signal=51%	CES1/PPARA/TTC39B/ABCA1/SREBF2/MSR1/CD36/ABCG1/SOAT1/PPARG/STARD4/LPL
GOBP_NEGATIVE_REGULATION_OF_DNA_RECOMBINATION	GOBP_NEGATIVE_REGULATION_OF_DNA_RECOMBINATION	44	0.434831	1.53978	0.0195979	0.2305	0.212346	10164	tags=34%, list=18%, signal=28%	H1-5/H1-4/H1-1/H1-3/KLHL15/MSH3/RIF1/TP53BP1/SHLD2/RADX/HELB/MSH2/NDFIP1/SMCHD1/MSH6
GOBP_SEROTONIN_UPTAKE	GOBP_SEROTONIN_UPTAKE	11	0.697171	1.74749	0.0196596	0.2305	0.212346	6535	tags=36%, list=11%, signal=32%	SLC18A2/SLC6A4/SLC22A2/SNCA
GOBP_REGULATION_OF_ACTION_POTENTIAL	GOBP_REGULATION_OF_ACTION_POTENTIAL	53	0.40103	1.48615	0.0196632	0.2305	0.212346	8549	tags=26%, list=15%, signal=22%	MIR208A/MTNR1B/DSG2/NPS/DSP/ANK2/AKAP9/NTSR1/DSC2/NOS1AP/PKP2/CTNNA3/FGF12/CAMK2D
GOCC_LOW_DENSITY_LIPOPROTEIN_PARTICLE	GOCC_LOW_DENSITY_LIPOPROTEIN_PARTICLE	13	0.652344	1.70789	0.019713	0.230661	0.212493	453	tags=15%, list=1%, signal=15%	APOA1/APOF
GOBP_POSITIVE_REGULATION_OF_HEART_GROWTH	GOBP_POSITIVE_REGULATION_OF_HEART_GROWTH	41	0.442799	1.53754	0.0198403	0.231725	0.213474	12056	tags=39%, list=21%, signal=31%	MIR208A/MIR204/ERBB4/AKAP6/MAPK1/WNT2/TGFBR3/FGF2/MIR590/MAPK14/FGFR2/ACACB/MTOR/EDN1/MIR199A1/YAP1
GOMF_ENDOPEPTIDASE_REGULATOR_ACTIVITY	GOMF_ENDOPEPTIDASE_REGULATOR_ACTIVITY	190	0.273323	1.25951	0.01991	0.232113	0.213832	1743	tags=9%, list=3%, signal=9%	HRG/SERPINC1/SERPIND1/SPOCK3/SERPINA7/KNG1/AHSG/AMBP/ITIH2/CST9LP1/CST5/WFIKKN2/ITIH1/SERPINA10/SPP2/LCN1/SERPINA11
GOBP_ARGININE_METABOLIC_PROCESS	GOBP_ARGININE_METABOLIC_PROCESS	19	0.611864	1.7905	0.0200832	0.233705	0.215298	12337	tags=42%, list=22%, signal=33%	OTC/ARG1/SLC39A8/DDAH1/AGMAT/NAGS/OAT/ATP2B4
GOBP_PHOSPHORYLATED_CARBOHYDRATE_DEPHOSPHORYLATION	GOBP_PHOSPHORYLATED_CARBOHYDRATE_DEPHOSPHORYLATION	17	0.621289	1.7444	0.0202849	0.235622	0.217064	14781	tags=65%, list=26%, signal=48%	INPP5J/G6PC/IMPA2/SYNJ1/BPNT1/MTMR2/OCRL/PTEN/IMPA1/BPNT2/INPP5A
GOBP_REGULATION_OF_CELL_MATRIX_ADHESION	GOBP_REGULATION_OF_CELL_MATRIX_ADHESION	121	0.315948	1.29688	0.0203225	0.23563	0.217072	15821	tags=55%, list=28%, signal=39%	HRG/MMP12/FMN1/EPB41L5/ACER2/AJAP1/PKHD1/LIMCH1/BCL2/HOXA7/SFRP1/NEXMIF/SLK/NF1/SEMA3E/PIK3CB/PLEKHA2/CLASP2/PTPRJ/ARHGAP6/PHLDB2/RASA1/DUSP3/CDH13/ROCK1/UTRN/TEK/KDR/RIN2/FERMT1/DDR1/MACF1/IQGAP1/THBS1/GSK3B/CDK6/PIK3R1/PRKCZ/DMTN/ROCK2/FUT1/CD36/PTEN/CASK/BCAS3/NRP1/PTPRA/RHOA/DLC1/LIMS1/DAG1/PTK2/CCL28/SDC4/PLET1/PEAK1/FAM107A/SMAD3/CLASP1/MYOC/FERMT2/CORO1C/TSC1/WDPCP/CX3CL1/DISC1
GOBP_REGULATION_OF_MEMBRANE_INVAGINATION	GOBP_REGULATION_OF_MEMBRANE_INVAGINATION	16	0.592605	1.65312	0.0203774	0.235838	0.217263	13011	tags=56%, list=23%, signal=43%	STAP1/F2RL1/ITGA2/ANO6/APPL2/SYT11/CD36/PPARG/ALOX15
GOBP_REGULATION_OF_MRNA_3_END_PROCESSING	GOBP_REGULATION_OF_MRNA_3_END_PROCESSING	28	0.456096	1.47143	0.0205377	0.237262	0.218575	11325	tags=50%, list=20%, signal=40%	CDC73/NUDT21/CPEB3/CTR9/RNF20/CPEB1/CCNT1/ZC3H14/VIRMA/NCBP1/DHX36/AHCYL1/PAPOLA/RNF40
GOBP_POSITIVE_REGULATION_OF_FATTY_ACID_BIOSYNTHETIC_PROCESS	GOBP_POSITIVE_REGULATION_OF_FATTY_ACID_BIOSYNTHETIC_PROCESS	23	0.535892	1.64588	0.0209707	0.240722	0.221762	2837	tags=17%, list=5%, signal=17%	APOA5/APOA1/PLA2G3/AVPR1A
GOMF_INOSITOL_1_4_5_TRISPHOSPHATE_BINDING	GOMF_INOSITOL_1_4_5_TRISPHOSPHATE_BINDING	13	0.649674	1.7009	0.0209747	0.240722	0.221762	5991	tags=38%, list=11%, signal=34%	TRPC5/ITPR2/PLCL1/PLCL2/ITPR1
GOBP_LONG_CHAIN_FATTY_ACID_IMPORT_INTO_CELL	GOBP_LONG_CHAIN_FATTY_ACID_IMPORT_INTO_CELL	17	0.617015	1.73239	0.0209904	0.240722	0.221762	16123	tags=65%, list=28%, signal=46%	SLC27A2/ACSL1/SPX/EPRS1/THBS1/ACSL3/CD36/FABP3/SLC27A5/AKT1/RPS6KB1
GOBP_POSITIVE_REGULATION_OF_PROTEIN_POLYUBIQUITINATION	GOBP_POSITIVE_REGULATION_OF_PROTEIN_POLYUBIQUITINATION	12	0.660598	1.68742	0.0210698	0.240722	0.221762	11746	tags=58%, list=21%, signal=46%	SPSB4/PRKN/DDX3X/MARCHF7/BIRC2/RNF40/XIAP
GOMF_FOLIC_ACID_BINDING	GOMF_FOLIC_ACID_BINDING	12	0.660934	1.68828	0.0210698	0.240722	0.221762	12227	tags=67%, list=22%, signal=52%	GNMT/FOLR3/DHFRP1/FTCDNL1/DHFR/MTHFS/TYMS/SLC46A1
GOBP_CDC42_PROTEIN_SIGNAL_TRANSDUCTION	GOBP_CDC42_PROTEIN_SIGNAL_TRANSDUCTION	14	0.624178	1.67039	0.0211014	0.240722	0.221762	1346	tags=21%, list=2%, signal=21%	APOC3/APOA1/NTN1
GOCC_CHITOSOME	GOCC_CHITOSOME	14	0.624306	1.67073	0.0211014	0.240722	0.221762	10235	tags=50%, list=18%, signal=41%	TYR/TYRP1/GPR143/GPNMB/SLC45A2/OCA2/RAB38
GOBP_REGULATION_OF_ATP_METABOLIC_PROCESS	GOBP_REGULATION_OF_ATP_METABOLIC_PROCESS	117	0.315269	1.29507	0.0211456	0.240796	0.221831	13795	tags=43%, list=24%, signal=32%	SLC4A1/PPARGC1A/PFKFB2/ZBTB20/PRKAA2/SLC4A4/MTCO2P12/ESRRB/ENTPD5/ATP7A/PPARA/FBP1/RANBP2/SNCA/NUP160/NUP133/PINK1/PDE12/PRKAG2/NUP153/POM121/NUP205/PRKAA1/EP300/NUP155/PGAM1/NDC1/NCOR1/NUP58/TPR/P2RX7/PPIF/NUP98/PSEN1/SLC25A23/APP/AK4/SEH1L/COX7A2L/ARNT/SLC25A12/PARP1/NUP54/SLC25A33/IGF1/NUP88/PRKAG1/COX7A1/ATPSCKMT/HIF1A
GOBP_NEGATIVE_REGULATION_OF_JNK_CASCADE	GOBP_NEGATIVE_REGULATION_OF_JNK_CASCADE	36	0.429396	1.442	0.02131	0.241708	0.222671	11356	tags=47%, list=20%, signal=38%	AMBP/PRKN/SFRP1/F2RL1/FKTN/HIPK3/AIDA/PINK1/MAPK8IP1/DUSP3/ITCH/MECOM/ZMYND11/NCOR1/TAOK3/PDCD4/ZNF675
GOBP_RESPONSE_TO_ACID_CHEMICAL	GOBP_RESPONSE_TO_ACID_CHEMICAL	118	0.3172	1.3094	0.0213443	0.241708	0.222671	10066	tags=32%, list=18%, signal=27%	GPRC6A/ARG1/PPARGC1A/SST/F7/CPS1/NEURL1/AVPR1A/RRAGD/PCK1/CPEB4/ATP7A/PDX1/PIK3CA/UBR1/AMIGO1/TOMM20/CPEB3/SESN3/CYBB/SH3BP4/PDGFC/IPO5/GLRB/UFL1/AQP2/CHUK/OPA1/PDGFD/CPEB1/PKD2/CREB1/GCLM/LARS1/UBR2/LAMTOR3/NTRK2/TMBIM6
GOBP_EXOCYTIC_PROCESS	GOBP_EXOCYTIC_PROCESS	76	0.352101	1.3915	0.0213697	0.241708	0.222671	11486	tags=37%, list=20%, signal=29%	CFTR/PLA2G3/UNC13C/GRIK5/SYT9/STXBP1/SNCA/UNC13B/EXOC6B/NLGN1/VTI1B/SYNJ1/STX3/BLOC1S6/SNX4/EXOC6/RAB3B/RAB3D/PSEN1/EXOC4/RAB8B/DMTN/RALB/RAB3A/RAB10/VAMP3/SYK/SNAP23
GOMF_VOLTAGE_GATED_POTASSIUM_CHANNEL_ACTIVITY_INVOLVED_IN_VENTRICULAR_CARDIAC_MUSCLE_CELL_ACTION_POTENTIAL_REPOLARIZATION	GOMF_VOLTAGE_GATED_POTASSIUM_CHANNEL_ACTIVITY_INVOLVED_IN_VENTRICULAR_CARDIAC_MUSCLE_CELL_ACTION_POTENTIAL_REPOLARIZATION	12	0.659661	1.68503	0.0213774	0.241708	0.222671	4910	tags=25%, list=9%, signal=23%	KCNE5/KCNE1B/KCNJ3
GOBP_ERBB2_SIGNALING_PATHWAY	GOBP_ERBB2_SIGNALING_PATHWAY	32	0.474616	1.57417	0.0217225	0.245145	0.225837	10572	tags=53%, list=19%, signal=43%	EGF/ERBB4/NRG1/CUL5/PIK3CA/CPNE3/BTC/NRG2/EGFR/GAB1/ERBB2/SOS1/NRG4/ERBIN/HSP90AA1/PIK3R1/PRKCA
GOCC_DNA_REPAIR_COMPLEX	GOCC_DNA_REPAIR_COMPLEX	40	0.414883	1.42216	0.0217582	0.245145	0.225837	15255	tags=55%, list=27%, signal=40%	NHEJ1/PMS2P5/XPC/MSH3/PMS2/ERCC4/TP53BP1/PRKDC/ATM/MSH2/MSH6/ERCC5/RAD23B/RCOR1/ERCC8/XRCC5/LIG4/XPA/XRCC6/MLH1/XRCC4/PMS2P11
GOMF_C_ACYLTRANSFERASE_ACTIVITY	GOMF_C_ACYLTRANSFERASE_ACTIVITY	20	0.551814	1.62482	0.0218821	0.246106	0.226722	13343	tags=60%, list=23%, signal=46%	ACAT1/SPTLC3/ACAA2/HADHB/ACSM3/SPTLC2/SPTLC1/HADHA/SCP2/ACSM6/ACSM5/ACSM2B
GOMF_CHLORIDE_CHANNEL_REGULATOR_ACTIVITY	GOMF_CHLORIDE_CHANNEL_REGULATOR_ACTIVITY	16	0.590003	1.64586	0.0220615	0.247686	0.228178	10041	tags=44%, list=18%, signal=36%	BSND/CFTR/WNK3/VTI1B/STX7/SGK1/WNK1
GOCC_OUTER_MITOCHONDRIAL_MEMBRANE_PROTEIN_COMPLEX	GOCC_OUTER_MITOCHONDRIAL_MEMBRANE_PROTEIN_COMPLEX	22	0.514563	1.57261	0.0221449	0.248186	0.228638	16574	tags=68%, list=29%, signal=48%	APOOL/TOMM20/HSPA9/DNAJC11/MTX3/TOMM70/IMMT/CHCHD3/MFN1/TOMM20L/APOO/TOMM40L/SAMM50/MTX2/MICOS10
GOMF_PHOSPHORIC_DIESTER_HYDROLASE_ACTIVITY	GOMF_PHOSPHORIC_DIESTER_HYDROLASE_ACTIVITY	88	0.334891	1.36112	0.0223306	0.249095	0.229475	14384	tags=43%, list=25%, signal=32%	CHRM1/PLCG2/CASR/PDE1C/PLCXD3/PDE3B/PLCL1/PLCL2/MPPED2/NAPEPLD/CHRM3/PLCB1/PLCZ1/PDE4D/FAN1/GPLD1/SMPDL3A/PDE7B/PLCD4/GDE1/TDP2/MPPE1/ENPP1/GDPD4/PLCH1/ENPP6/PLD1/PDE6B/ENPP3/GNB1/BDKRB2/ENPP7/PDE1A/GDPD2/PLD6/TDP1/ENPP2/PDE8A
GOBP_VESICLE_BUDDING_FROM_MEMBRANE	GOBP_VESICLE_BUDDING_FROM_MEMBRANE	109	0.31063	1.28889	0.022347	0.249095	0.229475	16666	tags=53%, list=29%, signal=38%	SLC2A4/FNBP1L/TRAPPC6B/USO1/PRKN/SEC24C/CUL3/SEC24B/SEC23B/MCFD2/LMAN1/WASL/TRAPPC10/GOLPH3L/INSIG1/SEC24A/KLHL12/AP3B1/VAPB/CNIH1/CHMP5/TGFA/PICALM/F8/PPP6C/SEC23IP/PRKCI/TMED10/MYO18A/ANKRD28/VAPA/SEC31A/SEC22B/SEC23A/SAR1B/CHMP4C/CD59/SNAP91/MIA3/SCFD1/GOLPH3/TMED2/PPP6R3/NSF/SEC16A/RAB1B/AP3D1/ARFGAP2/CHMP7/ARFGAP3/SNX3/RAB1A/CRYZL2P-SEC16B/NAPA/F5/SEC24D/RAB7A/CTSC
GOBP_NAD_BIOSYNTHETIC_PROCESS	GOBP_NAD_BIOSYNTHETIC_PROCESS	29	0.498658	1.6125	0.0223801	0.249095	0.229475	4259	tags=17%, list=7%, signal=16%	NMRK2/NMNAT2/SLC22A13/SLC5A8/NUDT12
GOBP_MITOCHONDRIAL_RNA_METABOLIC_PROCESS	GOBP_MITOCHONDRIAL_RNA_METABOLIC_PROCESS	47	0.406541	1.46005	0.0223822	0.249095	0.229475	15083	tags=53%, list=27%, signal=39%	LRPPRC/DARS2/TRMT61B/PDE12/TFAM/FOXO3/PRKAA1/FASTKD5/TFB2M/EARS2/WARS2/TRMT5/GRSF1/FASTKD1/METTL4/TRMT10A/MTO1/TRMT10C/SLC25A33/PPARGC1B/PNPT1/MTERF1/PRORP/TEFM/TRNT1
GOBP_NEGATIVE_REGULATION_OF_ESTABLISHMENT_OF_PROTEIN_LOCALIZATION	GOBP_NEGATIVE_REGULATION_OF_ESTABLISHMENT_OF_PROTEIN_LOCALIZATION	121	0.31364	1.28741	0.0224617	0.249379	0.229737	12320	tags=39%, list=22%, signal=30%	STXBP5L/MTNR1B/ACVR1C/CYP51A1/PKIA/RAB11FIP1/USP17L2/ADTRP/KCNJ11/IL12B/MAPT/LRRK2/PRKN/SFRP1/MIR128-1/NDFIP2/HMGCR/LMAN1/SVIP/VSNL1/LYPLA1/GHSR/ANGPT1/IRS1/REST/PTPN11/KLF7/FERMT1/INSIG1/RAB11FIP5/SYTL4/MIR30C1/MIR148A/CHP1/NDFIP1/BAG4/C11orf65/DMTN/YOD1/RSAD2/WWP2/CD36/SNX12/DPH3/MIR199A1/PPP3CA/DNAJA1
GOBP_HEME_TRANSPORT	GOBP_HEME_TRANSPORT	10	0.713248	1.73803	0.0224859	0.249379	0.229737	1501	tags=20%, list=3%, signal=19%	HRG/HPX
GOMF_ENOYL_COA_HYDRATASE_ACTIVITY	GOMF_ENOYL_COA_HYDRATASE_ACTIVITY	10	0.709723	1.72944	0.0227961	0.25238	0.232502	10009	tags=70%, list=18%, signal=58%	EHHADH/AUH/HADHB/HSD17B4/ECHDC1/HADHA/ECHDC3
GOCC_SITE_OF_POLARIZED_GROWTH	GOCC_SITE_OF_POLARIZED_GROWTH	184	0.280341	1.30253	0.0229976	0.254169	0.234151	12768	tags=36%, list=22%, signal=28%	FRMD7/LRRTM1/INPP5J/TRPC5/FLRT3/MYO9A/CPEB4/EPHA4/MAPT/LRRK2/SLC2A13/PPP1R9A/COBL/PCDHGB1/MYH14/EPS8/CDKL5/PTPRO/EXOC8/SNCA/USP9X/SHANK2/PINK1/LMTK2/HAP1/MAPK8IP1/SETX/UTRN/PTCH1/DOCK7/TRAK2/FRYL/MYO5A/NDRG2/NEFL/IQGAP1/STX3/PARD3/ALS2/KIF5B/EXOC6/MAP2/COPA/SHTN1/KIF20B/DICER1/ITGA4/HSP90AA1/CBL/PSEN1/CYFIP1/AMFR/EXOC4/EXOC7/APP/CXADR/FMR1/APBB1/TMOD2/COPG2/FRY/NIN/HSP90AB1/HNRNPR/GPM6A/PCDH9/TRP…
GOBP_HISTONE_MONOUBIQUITINATION	GOBP_HISTONE_MONOUBIQUITINATION	29	0.49636	1.60507	0.0230617	0.254437	0.234397	14587	tags=62%, list=26%, signal=46%	RAG1/PCGF5/CDC73/CTR9/RNF20/DDB1/WAC/UBE2E1/BCOR/CUL4B/RYBP/RNF40/TRIM37/DTX3L/SKP1/BMI1/LEO1/RNF2
GOBP_TETRAPYRROLE_METABOLIC_PROCESS	GOBP_TETRAPYRROLE_METABOLIC_PROCESS	62	0.368001	1.42393	0.0232004	0.255525	0.235399	10383	tags=37%, list=18%, signal=30%	CYP1A2/AMBP/HPX/CUBN/CYP1A1/MMUT/IREB2/SUCLA2/UGT1A4/FECH/PRSS1/IBA57/LMBRD1/ALAS1/MMAA/UGT1A1/CLYBL/MMADHC/PGRMC1/MTRR/NFE2L1/COX10/MTR
GOCC_COMPACT_MYELIN	GOCC_COMPACT_MYELIN	11	0.685897	1.71923	0.0232613	0.255569	0.23544	12226	tags=64%, list=22%, signal=50%	MBP/MARVELD2/MAG/MPP5/PRKCI/PTEN/JAM3
GOBP_CARDIAC_MUSCLE_CELL_ACTION_POTENTIAL_INVOLVED_IN_CONTRACTION	GOBP_CARDIAC_MUSCLE_CELL_ACTION_POTENTIAL_INVOLVED_IN_CONTRACTION	52	0.412763	1.52914	0.0232846	0.255569	0.23544	8533	tags=33%, list=15%, signal=28%	KCNE5/SCN2B/DSG2/ATP1A1/GPD1L/NEDD4L/DSP/KCNE1B/CACNA1D/ANK2/KCNJ3/DSC2/NOS1AP/PKP2/CTNNA3/FGF12/NUP155
GOBP_SODIUM_ION_IMPORT_ACROSS_PLASMA_MEMBRANE	GOBP_SODIUM_ION_IMPORT_ACROSS_PLASMA_MEMBRANE	19	0.605642	1.7723	0.0233996	0.256236	0.236054	7097	tags=37%, list=12%, signal=32%	SLC9A4/SLC9A2/HCN2/SLC34A1/SLC5A1/SLC12A2/SLC5A2
GOMF_CHEMOREPELLENT_ACTIVITY	GOMF_CHEMOREPELLENT_ACTIVITY	27	0.498863	1.60358	0.0234257	0.256236	0.236054	8829	tags=37%, list=16%, signal=31%	APOA1/SEMA3D/FLRT3/DPP4/NRG1/SEMA3E/SEMA6D/SEMA5A/NRG3/EPHA7
GOBP_TERPENOID_BIOSYNTHETIC_PROCESS	GOBP_TERPENOID_BIOSYNTHETIC_PROCESS	15	0.621673	1.72322	0.0236987	0.258779	0.238397	13694	tags=60%, list=24%, signal=46%	HMGCS2/CYP1A1/ALDH1A2/HMGCS1/ALDH8A1/DHRS9/RDH10/BCO1/FDPS
GOBP_REGULATION_OF_TRANSLATION_IN_RESPONSE_TO_STRESS	GOBP_REGULATION_OF_TRANSLATION_IN_RESPONSE_TO_STRESS	21	0.511929	1.53082	0.0237681	0.259092	0.238686	16405	tags=62%, list=29%, signal=44%	IMPACT/DDX3X/DNAJC3/RPS6KA3/PPP1R15B/EIF2AK2/EIF2S1/EIF2AK3/NPM1/EIF2AK4/TMED2/NCK1/EIF2AK1
GOBP_RESPONSE_TO_FORSKOLIN	GOBP_RESPONSE_TO_FORSKOLIN	10	0.705941	1.72023	0.0240367	0.260847	0.240302	12130	tags=60%, list=21%, signal=47%	CFTR/ADCY2/ADCY1/ADCY5/FDX1/ADCY6
GOBP_ESTROGEN_METABOLIC_PROCESS	GOBP_ESTROGEN_METABOLIC_PROCESS	38	0.444181	1.4969	0.024043	0.260847	0.240302	5879	tags=18%, list=10%, signal=17%	UGT2B15/CYP1A2/UGT2B4/CYP3A4/CYP1A1/CYP3A7/HSD17B12
GOMF_PRIMARY_ACTIVE_TRANSMEMBRANE_TRANSPORTER_ACTIVITY	GOMF_PRIMARY_ACTIVE_TRANSMEMBRANE_TRANSPORTER_ACTIVITY	62	0.366772	1.41917	0.0240517	0.260847	0.240302	8879	tags=31%, list=16%, signal=26%	CFTR/ABCB5/ABCB11/ABCC4/ATP1A1/ATP12A/ABCG8/ABCA8/ATP7A/ABCB1/ATP7B/TOMM20/ABCD3/LMBRD1/ABCB10/ABCB7/RALBP1/ABCG2/ABCA1
GOBP_PORE_COMPLEX_ASSEMBLY	GOBP_PORE_COMPLEX_ASSEMBLY	20	0.541959	1.5958	0.0241264	0.261151	0.240583	13051	tags=65%, list=23%, signal=50%	PLEKHA7/NUP153/NUP205/ANO6/AFDN/NDC1/ADAM10/P2RX7/NUP98/TMEM170A/TSPAN33/AHCTF1/RTN4
GOBP_CHYLOMICRON_ASSEMBLY	GOBP_CHYLOMICRON_ASSEMBLY	11	0.684279	1.71517	0.0241617	0.261151	0.240583	439	tags=27%, list=1%, signal=27%	APOC3/APOA2/APOA1
GOMF_THIOLESTER_HYDROLASE_ACTIVITY	GOMF_THIOLESTER_HYDROLASE_ACTIVITY	40	0.412307	1.41333	0.0242272	0.261416	0.240826	12743	tags=48%, list=22%, signal=37%	BAAT/ACOT12/ACOT11/UFSP2/ACAA2/HIBCH/NUDT7/LYPLA1/ABHD17B/ACOT1/ABHD13/THEM5/ABHD10/ABHD17C/ACOT2/ACOT4/LYPLAL1/OLAH/PPT1
GOMF_BETA_TUBULIN_BINDING	GOMF_BETA_TUBULIN_BINDING	38	0.442726	1.492	0.0243417	0.262207	0.241556	15406	tags=61%, list=27%, signal=44%	PACRG/SLC6A2/LRPPRC/GABARAPL1/APPL1/TAOK1/PIFO/TTLL7/VAPB/HTT/CFAP94/SYT11/SMC3/ARL8B/EML4/BCAS3/TRPV4/BBS4/FGF13/GABARAPL2/SPAST/RACGAP1/CCT5
GOMF_XENOBIOTIC_TRANSMEMBRANE_TRANSPORTER_ACTIVITY	GOMF_XENOBIOTIC_TRANSMEMBRANE_TRANSPORTER_ACTIVITY	30	0.49156	1.59656	0.0244172	0.262213	0.24156	10239	tags=37%, list=18%, signal=30%	ABCB11/ABCC4/SLC22A2/SLC47A1/ABCA8/SLC47A2/ABCB1/SLC17A3/RALBP1/ABCG2/SLC36A1
GOBP_NEGATIVE_REGULATION_OF_SMOOTH_MUSCLE_CONTRACTION	GOBP_NEGATIVE_REGULATION_OF_SMOOTH_MUSCLE_CONTRACTION	14	0.614814	1.64533	0.0244244	0.262213	0.24156	10169	tags=50%, list=18%, signal=41%	CALCA/ARHGAP42/GUCY1A1/ADRB2/CALCRL/KCNMA1/DOCK4
GOBP_FOREBRAIN_REGIONALIZATION	GOBP_FOREBRAIN_REGIONALIZATION	20	-0.643139	-1.53049	0.0245273	0.262875	0.24217	7066	tags=35%, list=12%, signal=31%	SIX3/DMRTA2/FEZF1/WNT7B/NKX2-1/FGF8/FEZF2
GOBP_MICROTUBULE_ANCHORING_AT_MICROTUBULE_ORGANIZING_CENTER	GOBP_MICROTUBULE_ANCHORING_AT_MICROTUBULE_ORGANIZING_CENTER	13	0.644194	1.68655	0.0247595	0.264918	0.244053	15554	tags=77%, list=27%, signal=56%	CCDC68/PCM1/DCTN1/GSK3B/KIF3A/NIN/BBS4/NINL/HOOK3/BICD2
GOBP_CELLULAR_RESPONSE_TO_LOW_DENSITY_LIPOPROTEIN_PARTICLE_STIMULUS	GOBP_CELLULAR_RESPONSE_TO_LOW_DENSITY_LIPOPROTEIN_PARTICLE_STIMULUS	21	0.511106	1.52836	0.0248735	0.265693	0.244766	13671	tags=71%, list=24%, signal=54%	CASR/CES1/HMGCS1/CDH13/CD9/ABCA1/SREBF2/ITGB1/SYK/CD36/NPC1/PPARG/SOCS5/LDLR/LPL
GOMF_CYSTEINE_TYPE_PEPTIDASE_ACTIVITY	GOMF_CYSTEINE_TYPE_PEPTIDASE_ACTIVITY	166	0.288713	1.28406	0.0250883	0.267139	0.246099	13138	tags=41%, list=23%, signal=32%	USP17L8/USP17L6P/CLC/USP17L7/USP17L15/CTSK/USP17L10/USP37/USP17L2/PGPEP1L/USP34/USP2/MINDY2/SCRN1/UFSP2/SFRP1/USP8/USP51/MINDY1/ZRANB1/USP22/SENP8/USP9X/COPS4/USP12/OTUD1/SCRN3/USP38/USP47/USP17L3/OTUB2/USP1/USP46/TINAG/LGMN/CAPN7/CTSO/USP32/USP24/CAPN14/USP25/OTUD7A/UCHL5/USP33/USP14/COPS2/USP28/VCPIP1/OTUD7B/PIGK/OTUD4/YOD1/MINDY3/USP10/USP30/USP18/USP45/OTUD6B/SENP2/PGPEP1/USP19/ATG4C/MALT1/CA…
GOCC_RNAI_EFFECTOR_COMPLEX	GOCC_RNAI_EFFECTOR_COMPLEX	16	0.583653	1.62814	0.0250928	0.267139	0.246099	16969	tags=81%, list=30%, signal=57%	MIR31/MIR206/DHX9/DDX6/DICER1/AGO1/EIF4E/DCP2/AGO2/AGO3/SND1/LIMD1/XPO5
GOBP_CELL_FATE_COMMITMENT_INVOLVED_IN_PATTERN_SPECIFICATION	GOBP_CELL_FATE_COMMITMENT_INVOLVED_IN_PATTERN_SPECIFICATION	11	-0.701956	-1.4738	0.0253237	0.269148	0.24795	3957	tags=27%, list=7%, signal=25%	SOX1/DMRT3/LHX3
GOBP_ACTIVATION_OF_ADENYLATE_CYCLASE_ACTIVITY	GOBP_ACTIVATION_OF_ADENYLATE_CYCLASE_ACTIVITY	39	0.426163	1.45408	0.0254429	0.269965	0.248702	8177	tags=28%, list=14%, signal=24%	CALCA/ADRB1/LHCGR/LGR4/ADCY2/ADCY1/LGR5/ADCY9/ADCY5/ADRB2/RAF1
GOMF_SIGNALING_RECEPTOR_COMPLEX_ADAPTOR_ACTIVITY	GOMF_SIGNALING_RECEPTOR_COMPLEX_ADAPTOR_ACTIVITY	43	0.403394	1.41859	0.0255794	0.270382	0.249087	9004	tags=26%, list=16%, signal=22%	STAP1/LRRK2/G3BP2/SPAG9/SAV1/SHANK2/IRS1/FRS2/GAB2/PTPN11/BLNK
GOBP_IMMATURE_B_CELL_DIFFERENTIATION	GOBP_IMMATURE_B_CELL_DIFFERENTIATION	10	0.702867	1.71274	0.0255874	0.270382	0.249087	9056	tags=50%, list=16%, signal=42%	KIT/RAG1/ATP11C/FNIP1/ATM
GOBP_INTRA_GOLGI_VESICLE_MEDIATED_TRANSPORT	GOBP_INTRA_GOLGI_VESICLE_MEDIATED_TRANSPORT	34	0.454361	1.54362	0.0256094	0.270382	0.249087	14938	tags=62%, list=26%, signal=46%	RAB6D/COG5/COG2/COG6/TRAPPC10/VTI1B/GOSR1/COPB1/COPA/RAB33B/NAPG/VTI1A/COPG2/RAB6A/COG3/GOLGA5/NSF/GABARAPL2/COPB2/CUX1/COG8
GOBP_HIGH_DENSITY_LIPOPROTEIN_PARTICLE_ASSEMBLY	GOBP_HIGH_DENSITY_LIPOPROTEIN_PARTICLE_ASSEMBLY	15	0.615076	1.70493	0.0259254	0.272816	0.251328	439	tags=20%, list=1%, signal=20%	APOA5/APOA2/APOA1
GOBP_NEGATIVE_REGULATION_OF_VOLTAGE_GATED_POTASSIUM_CHANNEL_ACTIVITY	GOBP_NEGATIVE_REGULATION_OF_VOLTAGE_GATED_POTASSIUM_CHANNEL_ACTIVITY	15	0.615279	1.70549	0.0259254	0.272816	0.251328	6003	tags=33%, list=11%, signal=30%	KCNE5/MTNR1B/ANK3/KCNE1B/MIR26A1
GOMF_N_ACYLTRANSFERASE_ACTIVITY	GOMF_N_ACYLTRANSFERASE_ACTIVITY	97	0.320661	1.32384	0.0260718	0.273904	0.252331	12177	tags=39%, list=21%, signal=31%	BAAT/NAT8L/CDY1B/CDY2B/PLAAT5/CERS6/GLYATL1/GNPNAT1/CERS2/NAA30/GTF3C4/USP22/CLOCK/ELP3/MCM3AP/KAT6A/BRPF3/ALAS1/NAA50/SIRT1/KAT2B/KAT6B/NCOA1/EP300/NAT8B/EPC2/NAA15/NCOA3/GLYAT/NMT2/KAT7/KAT5/BRCA2/NAGS/ATF2/CREBBP/TAF1/ESCO1
GOBP_ANION_HOMEOSTASIS	GOBP_ANION_HOMEOSTASIS	34	0.452473	1.53721	0.0261347	0.274113	0.252524	10749	tags=50%, list=19%, signal=41%	SLC12A3/OTC/ATP6V1B1/SLC34A1/CPS1/SLC12A1/TFAP2B/SLC1A1/SLC12A6/SLC12A2/XPR1/GCM2/CKB/ENPP1/CA12/SLC12A7/GLS
GOBP_POSITIVE_REGULATION_OF_TRIGLYCERIDE_METABOLIC_PROCESS	GOBP_POSITIVE_REGULATION_OF_TRIGLYCERIDE_METABOLIC_PROCESS	22	0.500649	1.53009	0.0262388	0.274753	0.253113	1627	tags=14%, list=3%, signal=13%	APOA5/APOA1/AADAC
GOMF_FMN_BINDING	GOMF_FMN_BINDING	16	0.581592	1.62239	0.02644	0.275385	0.253695	3563	tags=19%, list=6%, signal=18%	HAO1/IYD/HAO2
GOBP_REGULATION_OF_SYSTEMIC_ARTERIAL_BLOOD_PRESSURE	GOBP_REGULATION_OF_SYSTEMIC_ARTERIAL_BLOOD_PRESSURE	89	0.34509	1.41888	0.0264699	0.275385	0.253695	8029	tags=30%, list=14%, signal=26%	CALCA/KLK1/CRH/ADRB1/KLK3/CES1/HSD11B2/AVPR1A/ACE2/AVPR1B/SPX/AR/NTSR1/ARHGAP42/SUCNR1/DDAH1/F2RL1/SLC4A5/PTPRO/ADAMTS16/ENPEP/CYP4A11/ATP6AP2/PDE4D/BMPR2/ADRB2/AGTR2
GOBP_NEGATIVE_REGULATION_OF_ACTIN_FILAMENT_BUNDLE_ASSEMBLY	GOBP_NEGATIVE_REGULATION_OF_ACTIN_FILAMENT_BUNDLE_ASSEMBLY	32	0.465347	1.54342	0.0264823	0.275385	0.253695	15036	tags=66%, list=26%, signal=48%	FRMD7/MIR138-1/CGNL1/PPP1R9A/PRKN/ARHGAP28/CLASP2/ARHGAP6/PHLDB2/MET/WASF2/TACSTD2/PIK3R1/PAK2/ARAP1/TJP1/S1PR1/DLC1/PPFIA1/CLASP1/MYOC
GOBP_CELL_CELL_SIGNALING_INVOLVED_IN_CARDIAC_CONDUCTION	GOBP_CELL_CELL_SIGNALING_INVOLVED_IN_CARDIAC_CONDUCTION	33	0.485348	1.6299	0.026515	0.275385	0.253695	4910	tags=15%, list=9%, signal=14%	MIR208A/KCNE5/CACNA1D/ANK2/KCNJ3
GOBP_HEME_METABOLIC_PROCESS	GOBP_HEME_METABOLIC_PROCESS	33	0.48503	1.62883	0.026515	0.275385	0.253695	14591	tags=52%, list=26%, signal=38%	AMBP/HPX/IREB2/UGT1A4/FECH/IBA57/ALAS1/UGT1A1/PGRMC1/NFE2L1/COX10/COX15/SRRD/BDH2/ALAD/FXN/SLC11A2
GOBP_UREA_METABOLIC_PROCESS	GOBP_UREA_METABOLIC_PROCESS	13	0.64035	1.67649	0.0266519	0.276356	0.25459	2743	tags=23%, list=5%, signal=22%	OTC/ARG1/CPS1
GOBP_NEGATIVE_REGULATION_OF_CYTOKINE_PRODUCTION_INVOLVED_IN_IMMUNE_RESPONSE	GOBP_NEGATIVE_REGULATION_OF_CYTOKINE_PRODUCTION_INVOLVED_IN_IMMUNE_RESPONSE	26	0.471531	1.49229	0.0267046	0.276453	0.254679	1033	tags=12%, list=2%, signal=11%	APOA2/APOA1/ARG1
GOBP_CELLULAR_RESPONSE_TO_VASCULAR_ENDOTHELIAL_GROWTH_FACTOR_STIMULUS	GOBP_CELLULAR_RESPONSE_TO_VASCULAR_ENDOTHELIAL_GROWTH_FACTOR_STIMULUS	68	0.353273	1.38525	0.0268402	0.277407	0.255558	13215	tags=35%, list=23%, signal=27%	HRG/MIR329-1/CCBE1/IL12B/MIR16-1/PIK3CA/MIR26A1/PIK3CB/TSPAN12/PRKD1/KDR/GAB1/NUS1/CADM4/FLT1/MAPK14/VCAM1/EGR3/MIR199A1/JCAD/ATP2B4/SEMA6A/SPRY2/NRP1
GOBP_REGULATION_OF_LAMELLIPODIUM_ORGANIZATION	GOBP_REGULATION_OF_LAMELLIPODIUM_ORGANIZATION	52	0.410921	1.52232	0.0269514	0.278105	0.256201	10733	tags=35%, list=19%, signal=28%	HRG/FRMD7/OCLN/SLIT2/VIL1/ATP7A/PIK3CA/NCKAP1/FER/CARMIL1/AKIRIN1/WASF2/TWF1/PIK3R1/CYFIP1/ACTR2/DMTN/ABI2
GOBP_REGULATION_OF_LIPID_LOCALIZATION	GOBP_REGULATION_OF_LIPID_LOCALIZATION	183	0.284882	1.32361	0.027206	0.280279	0.258204	11840	tags=34%, list=21%, signal=27%	APOA5/APOC3/APOA2/APOA1/PON1/CRH/PLA2G3/CES1/EGF/AVPR1A/ACSL1/GALR1/ATP8A1/AVPR1B/ASXL2/FITM2/ABCG8/ABCA8/OSBPL8/NTSR1/LPCAT3/PRKN/PPARA/MIR26A1/MIR128-1/STXBP1/SLC12A2/ITGAV/EPRS1/CYP4A11/PLA2G4A/TTC39B/PTCH1/PTPN11/SIRT1/PLIN2/AGTR2/NUS1/ABCA1/THBS1/OSBPL11/MIR30C1/SREBF2/MIR148A/TMEM30A/AGTR1/TMF1/ITGB1/SCP2/ACACB/MAP2K6/PSEN1/MSR1/ABCA12/RAB3GAP1/NFKB1/SYK/EDN1/KDM5B/CD36/ABCG1/FABP3
GOBP_CALCIUM_IMPORT_INTO_THE_MITOCHONDRION	GOBP_CALCIUM_IMPORT_INTO_THE_MITOCHONDRION	13	0.638445	1.6715	0.0272827	0.280616	0.258514	12753	tags=69%, list=22%, signal=54%	AFG3L2/OPA1/MICU2/MAIP1/SLC25A23/MCUR1/MICU1/MICU3/VDAC1
GOBP_POSITIVE_REGULATION_OF_FATTY_ACID_METABOLIC_PROCESS	GOBP_POSITIVE_REGULATION_OF_FATTY_ACID_METABOLIC_PROCESS	38	0.437958	1.47593	0.0273283	0.280633	0.258529	7383	tags=26%, list=13%, signal=23%	APOA5/APOA1/PLA2G3/PPARGC1A/AVPR1A/FABP1/PPARA/CPT1A/GHSR/IRS1
GOBP_NEURON_FATE_COMMITMENT	GOBP_NEURON_FATE_COMMITMENT	59	-0.521005	-1.45216	0.0274402	0.281309	0.259152	14157	tags=36%, list=25%, signal=27%	PRRX1/WNT1/POU3F2/FEV/MNX1/ISL1/POU4F1/FOXA1/DMRTA2/ATOH1/MYT1L/SOX1/ISL2/TBR1/NKX2-1/LBX1/FOXG1/DMRT3/FEZF2/LHX3/TLX3
GOBP_AMYLOID_BETA_CLEARANCE	GOBP_AMYLOID_BETA_CLEARANCE	36	0.417313	1.40142	0.0274824	0.281309	0.259152	14234	tags=47%, list=25%, signal=35%	PLA2G3/LRP2/CYP51A1/IGF1R/HMGCR/CLTC/ROCK1/MME/PICALM/MSR1/IDE/CD36/ITGAM/LDLR/RAB11A/RAB5A/INSR
GOBP_REGULATION_OF_ESTABLISHMENT_OR_MAINTENANCE_OF_CELL_POLARITY	GOBP_REGULATION_OF_ESTABLISHMENT_OR_MAINTENANCE_OF_CELL_POLARITY	25	0.498448	1.56224	0.0275616	0.281667	0.259482	16154	tags=64%, list=28%, signal=46%	ARFGEF1/DOCK8/ROCK1/TEK/RICTOR/SHTN1/KIF20B/ROCK2/RNF41/BCAS3/RAP1B/RIPOR2/KANK1/WDPCP/CYRIB/LLGL1
GOBP_REGULATION_OF_CIRCADIAN_RHYTHM	GOBP_REGULATION_OF_CIRCADIAN_RHYTHM	118	0.310207	1.28053	0.0276473	0.282091	0.259873	12398	tags=38%, list=22%, signal=30%	PASD1/CRH/MTNR1B/ADRB1/SPSB4/PPARGC1A/RORB/NPS/PRKAA2/CIPC/USP2/ADCY1/FBXL17/NR1D2/PPARA/FBXW11/CRY2/RORA/CLOCK/RORC/USP9X/NLGN1/KLF10/PRKDC/FBXL3/PRKAA1/PER3/UBE3A/CREB1/GSK3B/NPY2R/SIN3A/GNAQ/MAPK9/OPN3/BTRC/ROCK2/MAPK8/MTOR/PHLPP1/ZFHX3/PDE6B/SRRD/PPARG/HNF4A
GOCC_PROTON_TRANSPORTING_TWO_SECTOR_ATPASE_COMPLEX_CATALYTIC_DOMAIN	GOCC_PROTON_TRANSPORTING_TWO_SECTOR_ATPASE_COMPLEX_CATALYTIC_DOMAIN	18	0.553698	1.56907	0.0277275	0.282457	0.26021	8599	tags=44%, list=15%, signal=38%	ATP6V1B1/ATP6V1C2/ATP6V1A/ATP5F1B/ATP5F1A/ATP6V1C1/ATP6V1H/ATP6V1B2
GOBP_SULFUR_COMPOUND_TRANSPORT	GOBP_SULFUR_COMPOUND_TRANSPORT	49	0.400643	1.44894	0.0278598	0.283352	0.261035	16144	tags=51%, list=28%, signal=37%	SLC26A7/SLC26A3/SLC26A4/SLC13A1/SLC19A2/SLC25A30/SLC1A1/SLC7A9/SLC19A3/ABCG2/SLC36A1/SLC26A9/LRRC8C/SLC44A4/SLC26A1/LRRC8D/SLC26A2/SLC35B3/SLC35B2/RACGAP1/LRRC8A/SLC25A26/SLC6A6/SLC9A3R1/GJA1
GOMF_THYROID_HORMONE_RECEPTOR_BINDING	GOMF_THYROID_HORMONE_RECEPTOR_BINDING	29	0.487917	1.57777	0.0280849	0.284644	0.262225	9851	tags=31%, list=17%, signal=26%	NR0B2/TACC1/MED13/MED1/TRIP12/JMJD1C/NCOR1/NCOA3/NSD1
GOBP_METHIONINE_BIOSYNTHETIC_PROCESS	GOBP_METHIONINE_BIOSYNTHETIC_PROCESS	12	0.644007	1.64505	0.0281442	0.284644	0.262225	15116	tags=67%, list=27%, signal=49%	BHMT/MTHFD1/MTRR/MTR/MTAP/ENOPH1/APIP/MTHFR
GOCC_SIGNAL_RECOGNITION_PARTICLE	GOCC_SIGNAL_RECOGNITION_PARTICLE	12	0.644275	1.64573	0.0281442	0.284644	0.262225	565	tags=17%, list=1%, signal=17%	RN7SL1/RN7SL3
GOBP_FATTY_ACYL_COA_METABOLIC_PROCESS	GOBP_FATTY_ACYL_COA_METABOLIC_PROCESS	42	0.422636	1.46935	0.0281654	0.284644	0.262225	12834	tags=50%, list=23%, signal=39%	ACSL1/ELOVL7/FITM2/SCD5/HSD17B12/NUDT7/ELOVL4/ACLY/HACD2/HSD17B4/ACSBG1/ACSL3/CBR4/FAR2/DGAT2/HTD2/THEM5/ACSL4/HSD17B8/PPT1/ACACA
GOMF_LIGAND_ACTIVATED_TRANSCRIPTION_FACTOR_ACTIVITY	GOMF_LIGAND_ACTIVATED_TRANSCRIPTION_FACTOR_ACTIVITY	52	0.407843	1.51092	0.0284181	0.28663	0.264055	12398	tags=42%, list=22%, signal=33%	RORB/ESRRG/NR3C2/THRB/ESRRB/HNF4G/PGR/AR/NR1D2/PPARA/RORA/RORC/VDR/RARB/NR3C1/NR4A3/NR2C2/THRA/ESRRA/ARNT/PPARG/HNF4A
GOBP_NEGATIVE_REGULATION_OF_CELL_ADHESION_MEDIATED_BY_INTEGRIN	GOBP_NEGATIVE_REGULATION_OF_CELL_ADHESION_MEDIATED_BY_INTEGRIN	12	0.643963	1.64493	0.0284518	0.28663	0.264055	10041	tags=58%, list=18%, signal=48%	HRG/PDE3B/ACER2/NEXMIF/PTPN11/SWAP70/WNK1
GOBP_C21_STEROID_HORMONE_METABOLIC_PROCESS	GOBP_C21_STEROID_HORMONE_METABOLIC_PROCESS	40	0.402138	1.37847	0.0285479	0.286799	0.26421	7489	tags=25%, list=13%, signal=22%	CYP17A1/DHRS2/PPARGC1A/AKR1D1/AKR1C4/CYP11A1/AKR1C1/EGR1/DHRS9/REST
GOBP_OXIDATIVE_DEMETHYLATION	GOBP_OXIDATIVE_DEMETHYLATION	19	0.597446	1.74831	0.0285584	0.286799	0.26421	9551	tags=26%, list=17%, signal=22%	CYP1A2/CYP3A4/CYP3A7/FTO/TET2
GOBP_NEGATIVE_REGULATION_OF_CHROMATIN_SILENCING	GOBP_NEGATIVE_REGULATION_OF_CHROMATIN_SILENCING	14	0.603556	1.6152	0.0287443	0.287152	0.264536	2105	tags=29%, list=4%, signal=28%	H1-5/H1-4/H1-1/H1-3
GOBP_URATE_METABOLIC_PROCESS	GOBP_URATE_METABOLIC_PROCESS	14	0.60344	1.61489	0.0287443	0.287152	0.264536	9662	tags=64%, list=17%, signal=53%	G6PC/URAD/SLC16A9/SLC2A9/SLC17A3/CARMIL1/ABCG2/SLC22A12/SLC22A11
GOMF_RNA_STEM_LOOP_BINDING	GOMF_RNA_STEM_LOOP_BINDING	14	0.60339	1.61475	0.0287443	0.287152	0.264536	13764	tags=71%, list=24%, signal=54%	CPEB3/EPRS1/RC3H2/DDX3X/CSDE1/DHX9/FMR1/RC3H1/MYH10/METTL16
GOBP_APICAL_JUNCTION_ASSEMBLY	GOBP_APICAL_JUNCTION_ASSEMBLY	85	0.325714	1.31672	0.0287738	0.287152	0.264536	13426	tags=44%, list=24%, signal=33%	CLDN8/GRHL2/MPP7/OCLN/CLDN19/CLDN16/MARVELD2/PATJ/MPP5/FRMPD2/APC/FZD5/STRN/CRB3/ROCK1/CLDN10/CLDN17/PKN2/AFDN/PDCD6IP/WNT11/PARD3/PARD6B/DLG1/PRKCI/MTDH/CLDN20/ROCK2/CLDN4/PAK2/POF1B/TJP1/CTNNA1/CLDN2/CLDN23/CLDN7/RHOA
GOCC_EARLY_ENDOSOME_MEMBRANE	GOCC_EARLY_ENDOSOME_MEMBRANE	161	0.29246	1.30835	0.0290414	0.289363	0.266572	13641	tags=43%, list=24%, signal=33%	CFTR/HSD17B6/MCOLN3/SORL1/GPNMB/CLVS2/EPHA4/WLS/ZFYVE9/MMGT1/SNX13/ZFYVE16/ATP9A/APPL1/FZD5/SLC1A1/NAPEPLD/LRP6/CLCN3/KIF16B/DNAJC13/SNX2/STAM2/CD207/CLCN4/PLEKHF2/EGFR/ITCH/PIKFYVE/RAB14/RABEP1/VTI1B/SNX19/MARCHF8/STAM/RAB11FIP5/LITAF/SNX6/APPL2/STX7/STX12/SNX4/MR1/MARCHF1/LDLRAD4/NTRK2/GGA2/SNX27/MTMR2/PSEN1/RAB21/RBSN/EPHB1/RAB4A/OCRL/EEA1/EPS15/SNX12/INPP5F/TMEM9B/SLC9A6/SLC39A14/SNX1/DTX3L/N…
GOMF_PHOSPHOLIPASE_C_ACTIVITY	GOMF_PHOSPHOLIPASE_C_ACTIVITY	28	0.441937	1.42576	0.0290979	0.289363	0.266572	7296	tags=29%, list=13%, signal=25%	CHRM1/PLCG2/CASR/PLCL1/PLCL2/CHRM3/PLCB1/PLCZ1
GOCC_CELL_CELL_CONTACT_ZONE	GOCC_CELL_CELL_CONTACT_ZONE	69	0.360003	1.40407	0.0291314	0.289363	0.266572	13083	tags=45%, list=23%, signal=35%	DSG2/NRAP/ATP1A1/ANK3/AKAP6/DSP/KCNJ11/ANK2/NECTIN3/AJAP1/PIK3CA/DSC2/SCN2A/ATP1B1/PKP2/CTNNA3/CADM4/AFDN/PKP4/CDH2/DLG1/AHNAK/PGM5/TMEM65/JAM3/CTNNA1/PCDH9/TJP2/SCN5A/SLC8A1/PAK1
GOBP_REGULATION_OF_CHOLESTEROL_EFFLUX	GOBP_REGULATION_OF_CHOLESTEROL_EFFLUX	41	0.427064	1.4829	0.029246	0.290049	0.267204	9422	tags=32%, list=17%, signal=26%	APOA1/PON1/CES1/EGF/ABCA8/MIR26A1/MIR128-1/TTC39B/PTCH1/SIRT1/ABCA1/SREBF2/MIR148A
GOBP_PROTEIN_LOCALIZATION_TO_CELL_CELL_JUNCTION	GOBP_PROTEIN_LOCALIZATION_TO_CELL_CELL_JUNCTION	21	0.503418	1.50537	0.0292954	0.290088	0.26724	12760	tags=43%, list=22%, signal=33%	MPP7/DSP/CGNL1/TJP3/JAK1/MAPK9/PAK2/TJP1/TJP2
GOBP_REGULATION_OF_GOLGI_ORGANIZATION	GOBP_REGULATION_OF_GOLGI_ORGANIZATION	17	0.596868	1.67583	0.0298097	0.294505	0.271309	16125	tags=65%, list=28%, signal=46%	AKAP9/MAPK1/CAMSAP2/RAB33B/RBSN/PDCD10/ARMH3/USP6NL/MAP2K1/PDE4DIP/EHD3
GOBP_VITAMIN_TRANSPORT	GOBP_VITAMIN_TRANSPORT	41	0.425663	1.47804	0.0298338	0.294505	0.271309	3911	tags=22%, list=7%, signal=20%	APOA1/GC/TTPA/AFM/LRP2/CUBN/FOLR3/SLC19A2/SLC2A2
GOMF_VITAMIN_B6_BINDING	GOMF_VITAMIN_B6_BINDING	55	0.385973	1.44822	0.0301692	0.297355	0.273935	10416	tags=33%, list=18%, signal=27%	ALB/TAT/AGXT/ABAT/ETNPPL/AGXT2/GOT1/DDC/SPTLC3/ALAS1/SPTLC2/SHMT1/MTARC2/SPTLC1/PLPBP/CTH/PDXDC1/GOT2
GOBP_MANNOSYLATION	GOBP_MANNOSYLATION	36	0.413282	1.38788	0.0304246	0.299343	0.275766	17539	tags=75%, list=31%, signal=52%	ALG11/TMTC2/FKTN/TMTC1/CRPPA/DPY19L4/ALG1L/NUS1/LARGE2/ALG2/TMTC3/PIGB/PIGV/RXYLT1/ALG12/ALG9/TMTC4/PIGM/B4GAT1/DPY19L1/POMGNT2/DPY19L3/LARGE1/ALG1/POMT1/DPM1/ALG8
GOBP_MICROTUBULE_ANCHORING_AT_CENTROSOME	GOBP_MICROTUBULE_ANCHORING_AT_CENTROSOME	11	0.673279	1.6876	0.0304647	0.299343	0.275766	15034	tags=82%, list=26%, signal=60%	CCDC68/PCM1/DCTN1/GSK3B/KIF3A/NIN/BBS4/NINL/HOOK3
GOBP_LIPID_PHOSPHORYLATION	GOBP_LIPID_PHOSPHORYLATION	72	0.345697	1.34397	0.0305421	0.299642	0.276041	13483	tags=49%, list=24%, signal=37%	PIK3C2G/DGKI/CERKL/IMPA2/PIK3C2A/PIK3CA/SOCS7/PIP5K1B/PIK3CB/P3R3URF/SOCS6/PIK3C3/PIKFYVE/EFR3B/PI4KA/PI4K2B/CISH/IP6K3/PIP4K2C/SOCS4/BPNT1/FAM126B/PIK3R1/DGKK/DGKB/TTC7B/SMG1/EFR3A/DGKH/SOCS5/IMPA1/PIK3R3/CERK/IP6K1/DGKE
GOBP_POSITIVE_REGULATION_OF_INTERFERON_ALPHA_PRODUCTION	GOBP_POSITIVE_REGULATION_OF_INTERFERON_ALPHA_PRODUCTION	22	0.492785	1.50605	0.0310771	0.304422	0.280445	11311	tags=59%, list=20%, signal=47%	MMP12/TLR3/TLR4/CHUK/TLR7/DDX3X/TLR8/IFIH1/DHX9/HSPD1/DHX36/DDX58/SETD2
GOMF_MONOCARBOXYLIC_ACID_TRANSMEMBRANE_TRANSPORTER_ACTIVITY	GOMF_MONOCARBOXYLIC_ACID_TRANSMEMBRANE_TRANSPORTER_ACTIVITY	69	0.358527	1.39831	0.0313896	0.306836	0.282669	9265	tags=36%, list=16%, signal=30%	SLCO1B1/SLC10A1/SLC16A7/SLC22A9/AKR1C4/SLC10A2/ABCB11/SLC16A11/SLC16A12/SLC22A13/SLC27A2/SLC5A8/SLCO1A2/SLC16A9/SLC5A12/SLC16A4/SLC1A1/SLC10A5/MPC1/SLC51B/SLC25A13/CEACAM1/ABCG2/SLC1A2/SLC10A6
GOBP_REGULATION_OF_OSSIFICATION	GOBP_REGULATION_OF_OSSIFICATION	111	0.31112	1.29613	0.0314198	0.306836	0.282669	10014	tags=29%, list=18%, signal=24%	MIR208A/CALCA/AHSG/BMPR1B/BMP7/KL/PBX1/SOST/BCL2/SGMS2/SFRP1/ADGRV1/BMP2K/LRP6/MAPK1/NBR1/TGFB2/BMPR2/TXLNG/ACVR2B/KREMEN1/PTPN11/ADRB2/ANO6/ZMPSTE24/ZBTB16/BCOR/P2RX7/TOB2/NIPBL/MAPK14/ACVR2A
GOBP_NEGATIVE_REGULATION_OF_BONE_MINERALIZATION	GOBP_NEGATIVE_REGULATION_OF_BONE_MINERALIZATION	20	0.531561	1.56518	0.0316073	0.308195	0.283921	516	tags=10%, list=1%, signal=10%	MIR208A/AHSG
GOBP_REGULATION_OF_NEUTROPHIL_ACTIVATION	GOBP_REGULATION_OF_NEUTROPHIL_ACTIVATION	10	-0.70882	-1.46354	0.0321607	0.312768	0.288134	3418	tags=30%, list=6%, signal=28%	PRAM1/PLA2G2A/CD177
GOBP_POSITIVE_REGULATION_OF_PHAGOCYTOSIS	GOBP_POSITIVE_REGULATION_OF_PHAGOCYTOSIS	65	0.362707	1.39977	0.0321744	0.312768	0.288134	516	tags=6%, list=1%, signal=6%	STAP1/APOA2/APOA1/AHSG
GOBP_SEROTONIN_TRANSPORT	GOBP_SEROTONIN_TRANSPORT	20	0.528875	1.55727	0.0323554	0.313584	0.288885	6535	tags=25%, list=11%, signal=22%	CRH/SLC18A2/SLC6A4/SLC22A2/SNCA
GOBP_PROTEIN_OXIDATION	GOBP_PROTEIN_OXIDATION	14	0.588594	1.57516	0.0323996	0.313584	0.288885	439	tags=14%, list=1%, signal=14%	APOA2/APOA1
GOMF_AMINO_ACID_BINDING	GOMF_AMINO_ACID_BINDING	54	0.403644	1.50361	0.0324058	0.313584	0.288885	7910	tags=30%, list=14%, signal=26%	TAT/OTC/AGXT/CASR/GPR143/GNMT/CPS1/GLUD2/DDAH1/UBR1/SLC1A1/DDC/SESN3/GLRB/GCLC/SHMT1
GOBP_POTASSIUM_ION_IMPORT_ACROSS_PLASMA_MEMBRANE	GOBP_POTASSIUM_ION_IMPORT_ACROSS_PLASMA_MEMBRANE	47	0.392397	1.40925	0.0326875	0.315831	0.290955	7077	tags=32%, list=12%, signal=28%	SLC12A3/HCN2/ATP4B/KCNJ1/ATP1A1/WNK3/ATP12A/KCNJ11/SLC12A1/KCNJ3/KCNJ15/SLC12A6/SLC12A2/KCNJ10/ATP1B1
GOBP_GLUCOCORTICOID_METABOLIC_PROCESS	GOBP_GLUCOCORTICOID_METABOLIC_PROCESS	25	0.490238	1.53651	0.0327921	0.316362	0.291445	3857	tags=20%, list=7%, signal=19%	CYP17A1/APOA1/HSD11B2/ATP1A1/CYP11A1
GOBP_PROGESTERONE_METABOLIC_PROCESS	GOBP_PROGESTERONE_METABOLIC_PROCESS	15	0.599323	1.66126	0.0329267	0.317181	0.292199	7424	tags=40%, list=13%, signal=35%	CYP17A1/PPARGC1A/AKR1C4/AKR1C1/EGR1/DHRS9
GOBP_REGULATION_OF_CELL_GROWTH_INVOLVED_IN_CARDIAC_MUSCLE_CELL_DEVELOPMENT	GOBP_REGULATION_OF_CELL_GROWTH_INVOLVED_IN_CARDIAC_MUSCLE_CELL_DEVELOPMENT	21	0.494584	1.47895	0.0329803	0.317218	0.292233	14	tags=5%, list=0%, signal=5%	MIR208A
GOBP_SYNAPSE_ASSEMBLY	GOBP_SYNAPSE_ASSEMBLY	171	0.284364	1.28189	0.0330707	0.317608	0.292593	11618	tags=34%, list=20%, signal=27%	LRRTM1/ADGRF1/GABRA2/CEL/NTN1/LRRN1/GRID2/LRFN5/GABRB2/GABRB3/CLSTN2/IL1RAPL2/ERBB4/SPTBN2/CDH9/FLRT3/BSN/PCLO/GPC6/CDH1/FARP1/PPP1R9A/FZD5/ADGRB3/AMIGO1/PTPRD/SNCA/ARMCX5-GPRASP2/LHFPL4/SHANK2/RAB29/GHSR/LRRTM2/CBLN1/NLGN1/SLITRK5/VPS35/GPC4/EPHA7/ADGRL2/LRRTM3/FZD1/PCDHB11/CDH2/SIX4/LRRC4/NTRK2/BDNF/PCDHB3/PCDHB5/IGFN1/APP/EPHB1/NRCAM/CLSTN1/MECP2/VSTM5/NPTN
GOBP_FIBRINOLYSIS	GOBP_FIBRINOLYSIS	25	0.489229	1.53334	0.0331945	0.318318	0.293246	604	tags=12%, list=1%, signal=12%	HRG/APOH/CPB2
GOBP_MEMBRANE_LIPID_BIOSYNTHETIC_PROCESS	GOBP_MEMBRANE_LIPID_BIOSYNTHETIC_PROCESS	146	0.287432	1.25273	0.0333615	0.319439	0.29428	11613	tags=38%, list=20%, signal=30%	CWH43/CERKL/ST8SIA5/UGT8/CERS6/FA2H/ELOVL7/ASAH1/ACER2/HACD3/PPM1L/ST3GAL4/ST8SIA6/ABCA8/CERS2/SGMS2/B4GALT6/B4GALNT1/PGAP4/CERT1/SPTLC3/ALDH3A2/PGAP1/ELOVL4/PIGO/SGMS1/PRKD1/HACD2/SPTLC2/PLPP3/CLN8/ST8SIA4/PRKAA1/PIGH/SGPP1/KDSR/VAPB/SPTLC1/PRKD3/ST6GALNAC3/PIGN/ASAH2/PIGS/SCCPDH/MPPE1/PIGK/PIGB/PIGA/SGPP2/B4GALT5/PIGF/SAMD8/PIGV/VAPA/ST3GAL1
GOBP_REGULATION_OF_CELL_FATE_COMMITMENT	GOBP_REGULATION_OF_CELL_FATE_COMMITMENT	30	0.476664	1.54817	0.0334252	0.319569	0.294399	4819	tags=20%, list=8%, signal=18%	MIR208A/SOSTDC1/ESRP1/MIR206/IL12B/AR
GOBP_FRUCTOSE_METABOLIC_PROCESS	GOBP_FRUCTOSE_METABOLIC_PROCESS	15	0.593948	1.64637	0.0335661	0.31994	0.294741	18213	tags=73%, list=32%, signal=50%	PFKFB2/SORD/FBP1/KHK/ALDOB/ALDH1A1/ALDOA/ALDOC/PFKFB3/FBP2/AKR1B1
GOMF_QUATERNARY_AMMONIUM_GROUP_BINDING	GOMF_QUATERNARY_AMMONIUM_GROUP_BINDING	31	0.448311	1.47928	0.0336848	0.31994	0.294741	439	tags=10%, list=1%, signal=10%	APOA5/APOA2/APOA1
GOMF_PHOSPHATIDYLINOSITOL_3_KINASE_ACTIVITY	GOMF_PHOSPHATIDYLINOSITOL_3_KINASE_ACTIVITY	12	0.63677	1.62656	0.0336928	0.31994	0.294741	9056	tags=50%, list=16%, signal=42%	PIK3C2G/PIK3C2A/PIK3CA/PIK3CB/PIK3C3/ATM
GOBP_PTERIDINE_CONTAINING_COMPOUND_METABOLIC_PROCESS	GOBP_PTERIDINE_CONTAINING_COMPOUND_METABOLIC_PROCESS	33	0.473731	1.59089	0.0338126	0.31994	0.294741	16298	tags=55%, list=29%, signal=39%	ALDH1L1/DHFRP1/SHMT1/MTHFD1/DHFR/MTHFS/DHFR2/MTRR/MTR/TYMS/SLC46A1/GGH/QDPR/GART/PCBD2/MTHFR/PCBD1/FTCD
GOBP_ENDOCYTIC_RECYCLING	GOBP_ENDOCYTIC_RECYCLING	50	0.387542	1.41566	0.0338366	0.31994	0.294741	12435	tags=40%, list=22%, signal=31%	PLA2G3/SORL1/KIAA1109/EPG5/RAB11FIP4/DENND1B/LMTK2/VPS26C/RAB14/ACAP2/SNX4/VPS50/DENND1A/DENND1C/CCDC93/EPS15/VPS35L/SNX12/INPP5F/VPS52
GOBP_METHIONINE_METABOLIC_PROCESS	GOBP_METHIONINE_METABOLIC_PROCESS	16	0.568112	1.58479	0.0338498	0.31994	0.294741	15116	tags=62%, list=27%, signal=46%	GNMT/BHMT/MTHFD1/MTRR/MTR/MTAP/MSRA/ENOPH1/APIP/MTHFR
GOMF_RETINOIC_ACID_RECEPTOR_BINDING	GOMF_RETINOIC_ACID_RECEPTOR_BINDING	26	0.464392	1.46969	0.0338537	0.31994	0.294741	9851	tags=35%, list=17%, signal=29%	NR0B2/CNOT1/NRIP1/TACC1/MED1/NCOA1/VDR/RARB/NSD1
GOBP_REGULATION_OF_LIPASE_ACTIVITY	GOBP_REGULATION_OF_LIPASE_ACTIVITY	97	0.313909	1.29596	0.0339128	0.31994	0.294741	10928	tags=31%, list=19%, signal=25%	APOA5/APOC3/APOA2/APOH/APOA1/KIT/AVPR1A/ANGPTL3/AVPR1B/SNCA/LIPC/P2RY12/ARHGAP6/EGFR/PDPK1/GNA13/FGF2/MIR590/FLT1/AGTR1/ARL1/NTRK2/BDNF/FGFR2/PHB/PRKCZ/GNAQ/LPAR1/SORT1/PCSK5
GOBP_LYSINE_METABOLIC_PROCESS	GOBP_LYSINE_METABOLIC_PROCESS	13	0.625598	1.63786	0.0339155	0.31994	0.294741	8564	tags=38%, list=15%, signal=33%	SLC25A21/DLD/OGDH/DLST/AASDHPPT
GOMF_TRANSMEMBRANE_RECEPTOR_PROTEIN_KINASE_ACTIVITY	GOMF_TRANSMEMBRANE_RECEPTOR_PROTEIN_KINASE_ACTIVITY	80	0.326877	1.29172	0.0342062	0.32201	0.296648	10133	tags=34%, list=18%, signal=28%	BMPR1B/SOSTDC1/KIT/EPHA5/HJV/ACVR1C/ERBB4/EPHA4/IGF1R/MERTK/IGF2R/CRIM1/EGFR/BMPR2/ACVR2B/TEK/KDR/TGFBR2/ERBB2/DDR1/EPHA7/TGFBR3/MET/FLT1/NTRK2/ACVR2A/FGFR2
GOBP_EXPORT_ACROSS_PLASMA_MEMBRANE	GOBP_EXPORT_ACROSS_PLASMA_MEMBRANE	58	0.361114	1.36835	0.034236	0.32201	0.296648	8879	tags=31%, list=16%, signal=26%	KCNE5/ATP4B/ABCC4/ATP1A1/SLC4A4/KCNE1B/ATP12A/SLC22A2/SLC40A1/PDZK1/ABCB1/SLC17A3/ATP1B1/SLC15A2/RALBP1/ANO6/ABCG2/ABCA1
GOBP_RESPONSE_TO_STEROL_DEPLETION	GOBP_RESPONSE_TO_STEROL_DEPLETION	18	0.541839	1.53546	0.0344267	0.323327	0.297861	14099	tags=56%, list=25%, signal=42%	SPRING1/ERLIN2/LPCAT3/INSIG1/SREBF2/AMFR/EIF2A/ERLIN1/TMED2/INSIG2
GOBP_NEGATIVE_REGULATION_OF_PROTEIN_SUMOYLATION	GOBP_NEGATIVE_REGULATION_OF_PROTEIN_SUMOYLATION	11	-0.690839	-1.45046	0.0344958	0.3235	0.298021	2689	tags=18%, list=5%, signal=17%	MAGEA2/MAGEA2B
GOBP_REGULATION_OF_AUTOPHAGY_OF_MITOCHONDRION	GOBP_REGULATION_OF_AUTOPHAGY_OF_MITOCHONDRION	31	0.445533	1.47011	0.034627	0.324253	0.298714	14648	tags=45%, list=26%, signal=34%	VPS13D/PRKN/FZD5/VPS13C/PINK1/SREBF2/HTT/BNIP3L/FBXO7/USP30/RNF41/VDAC1/HIF1A/CSNK2A2
GOBP_NEURON_DEATH_IN_RESPONSE_TO_OXIDATIVE_STRESS	GOBP_NEURON_DEATH_IN_RESPONSE_TO_OXIDATIVE_STRESS	26	0.462535	1.46382	0.0346948	0.324412	0.29886	15444	tags=62%, list=27%, signal=45%	LANCL1/PRKN/SLC1A1/PINK1/TLR4/REST/NR4A3/FBXO7/PARP1/HIF1A/TBC1D24/ARL6IP5/NONO/MCL1/TSC1/ATG7
GOCC_MITOCHONDRIA_ASSOCIATED_ENDOPLASMIC_RETICULUM_MEMBRANE	GOCC_MITOCHONDRIA_ASSOCIATED_ENDOPLASMIC_RETICULUM_MEMBRANE	20	0.521558	1.53573	0.0349737	0.326541	0.300822	14419	tags=70%, list=25%, signal=52%	PDZD8/TOMM20/CANX/STX17/ZFYVE1/RAB38/TMX2/AHCYL1/ACSL4/SERAC1/CLCC1/ATG5/BCL2L10/ATG14
GOMF_HORMONE_BINDING	GOMF_HORMONE_BINDING	84	0.318889	1.29279	0.0351006	0.327197	0.301426	7588	tags=27%, list=13%, signal=24%	TTR/GCGR/PRLR/LHCGR/LRP2/NPR3/MLNR/MTNR1A/AVPR1A/ATP1A1/ABHD2/THRB/GHR/GALR1/SLC40A1/AR/LEPR/CRHBP/IGF1R/GHSR/EGFR/CDH13/EDNRB
GOMF_INSULIN_RECEPTOR_SUBSTRATE_BINDING	GOMF_INSULIN_RECEPTOR_SUBSTRATE_BINDING	10	0.682496	1.66309	0.0352203	0.327197	0.301426	14234	tags=80%, list=25%, signal=60%	PIK3CA/IGF1R/PTPN11/PIK3R1/PRKCZ/JAK2/PRKCD/INSR
GOCC_AZUROPHIL_GRANULE	GOCC_AZUROPHIL_GRANULE	153	0.29612	1.30611	0.0352398	0.327197	0.301426	14159	tags=38%, list=25%, signal=29%	ORM2/DEFA1/TTR/ARG1/DEFA3/DEFA4/FRK/PIGR/SLCO4C1/ATP8A1/ACP3/LYZ/MPO/CPNE3/C6orf120/MAPK1/DNAJC13/ATP11B/ACLY/DNAJC3/GNS/CPPED1/LAMP2/STX3/DYNC1H1/STX7/SYNGR1/TMEM30A/MAGT1/ARSB/GDI2/RAB3D/PSEN1/PSAP/PRCP/ACTR2/GLB1/CEACAM8/MANBA/VAPA/SNAP23/ACTR10/FAF2/FUCA1/C3AR1/CREG1/TOLLIP/GGH/HEXB/NHLRC3/PRKCD/SNAP29/GM2A/CTSG/SDCBP/STOM/RAP1B/CCT2
GOBP_TUBULIN_DEACETYLATION	GOBP_TUBULIN_DEACETYLATION	11	0.660821	1.65637	0.0352907	0.327197	0.301426	11482	tags=55%, list=20%, signal=44%	PRKAA2/MAPT/TPPP/PRKAA1/EP300/BEX4
GOBP_CARDIAC_MUSCLE_CELL_CONTRACTION	GOBP_CARDIAC_MUSCLE_CELL_CONTRACTION	70	0.349156	1.33923	0.0353297	0.327197	0.301426	8549	tags=30%, list=15%, signal=26%	KCNE5/SCN2B/DSG2/ATP1A1/GPD1L/NEDD4L/DSP/KCNE1B/CACNA1D/ANK2/KCNJ3/AKAP9/PIK3CA/DSC2/NOS1AP/PKP2/CTNNA3/PDE4D/FGF12/NUP155/CAMK2D
GOBP_CELL_ADHESION_MEDIATED_BY_INTEGRIN	GOBP_CELL_ADHESION_MEDIATED_BY_INTEGRIN	72	0.341757	1.32865	0.0353518	0.327197	0.301426	10225	tags=31%, list=18%, signal=25%	HRG/VTN/FYB2/PDE3B/DPP4/NPNT/ACER2/ITGB8/ADAM9/NEXMIF/ITGAV/P2RY12/ITGA2/TGFB2/PLPP3/PTPN11/FERMT1/PODXL/SWAP70/WNK1/ITGA4/ITGB1
GOBP_LIPOXYGENASE_PATHWAY	GOBP_LIPOXYGENASE_PATHWAY	16	0.562893	1.57023	0.0355405	0.328467	0.302596	3103	tags=19%, list=5%, signal=18%	PON1/PLA2G3/HPGD
GOCC_COATED_VESICLE_MEMBRANE	GOCC_COATED_VESICLE_MEMBRANE	179	0.282347	1.28666	0.0356146	0.328675	0.302788	11643	tags=35%, list=20%, signal=28%	CFTR/SLC18A2/SH3GL2/TYRP1/LRP2/EGF/EPN3/SYT9/USO1/HSPA8/FZD5/SEC24C/IGF2R/BTC/SEC24B/M6PR/SEC23B/MCFD2/LMAN1/TGOLN2/MYO6/CD207/CLTC/AFTPH/EGFR/AP1G1/TBC1D5/CLINT1/STX17/ADRB2/RASSF9/EPN2/NCALD/BTBD8/TMED7/VTI1B/CD9/SEC24A/AP2B1/KLHL12/SYNRG/AP3B1/SREBF2/CNIH1/ARCN1/DAB2/COPB1/COPA/DENND1A/SCARB2/TGFA/PICALM/SYT11/SEC23IP/TMED10/FZD4/SYT2/RAB3A/VAMP3/TFRC/VTI1A/SEC31A/COPG2
GOBP_GOLGI_LOCALIZATION	GOBP_GOLGI_LOCALIZATION	14	0.580935	1.55466	0.0357324	0.329286	0.303351	16075	tags=64%, list=28%, signal=46%	DAB1/ARCN1/PDCD10/ARHGAP21/TBCCD1/UVRAG/CDC42/HOOK3/SLC9A3R1
GOBP_REGULATION_OF_VACUOLE_ORGANIZATION	GOBP_REGULATION_OF_VACUOLE_ORGANIZATION	47	0.388481	1.39519	0.0359238	0.330571	0.304535	14568	tags=53%, list=26%, signal=40%	TBC1D14/SMCR8/LRRK2/MTM1/RAB3GAP2/PINK1/PIKFYVE/BECN1/PIP4K2C/SCARB2/UBQLN2/IFT88/RALB/RAB3GAP1/SEC22B/FEZ2/ENO4/SH3GLB1/SCFD1/LAPTM4B/ENO3/RAB5A/PIP4K2A/RAB1B/TBC1D12
GOBP_REGULATION_OF_SKELETAL_MUSCLE_ADAPTATION	GOBP_REGULATION_OF_SKELETAL_MUSCLE_ADAPTATION	14	-0.663627	-1.48494	0.0359897	0.330701	0.304654	13715	tags=36%, list=24%, signal=27%	MIR499A/ACTN3/MYH7/TNNT1/MIR208B
GOBP_REGULATION_OF_FATTY_ACID_OXIDATION	GOBP_REGULATION_OF_FATTY_ACID_OXIDATION	33	0.469694	1.57733	0.0362451	0.331841	0.305704	12234	tags=55%, list=22%, signal=43%	PPARGC1A/ABCB11/PDK4/FABP1/PPARA/CPT1A/PRKAG2/IRS1/APPL2/LONP2/ACADL/DGAT2/ACACB/NR4A3/MTOR/MLYCD/FABP3/PPARG
GOBP_SPINAL_CORD_PATTERNING	GOBP_SPINAL_CORD_PATTERNING	19	-0.620556	-1.46509	0.03625	0.331841	0.305704	5021	tags=21%, list=9%, signal=19%	RFX4/SOX1/DMRT3/LHX3
GOBP_LONG_TERM_SYNAPTIC_DEPRESSION	GOBP_LONG_TERM_SYNAPTIC_DEPRESSION	30	0.471342	1.53089	0.0362699	0.331841	0.305704	7247	tags=30%, list=13%, signal=26%	SLC24A2/GRID2/MAPT/PPP1R9A/ABHD6/STXBP1/SLC24A1/SHANK2/CBLN1
GOBP_REGULATION_OF_FATTY_ACID_BIOSYNTHETIC_PROCESS	GOBP_REGULATION_OF_FATTY_ACID_BIOSYNTHETIC_PROCESS	54	0.398277	1.48361	0.0364313	0.33284	0.306625	3530	tags=17%, list=6%, signal=16%	APOA5/APOC3/APOA1/CYP7A1/PLA2G3/AVPR1A/PRKAA2/PDK4/MIR204
GOBP_REGULATION_OF_SYSTEMIC_ARTERIAL_BLOOD_PRESSURE_BY_RENIN_ANGIOTENSIN	GOBP_REGULATION_OF_SYSTEMIC_ARTERIAL_BLOOD_PRESSURE_BY_RENIN_ANGIOTENSIN	22	0.483256	1.47693	0.0366597	0.334448	0.308106	12312	tags=55%, list=22%, signal=43%	CES1/ACE2/SUCNR1/F2RL1/ENPEP/ATP6AP2/AGTR2/MME/AGTR1/CPA3/PCSK5/CMA1
GOBP_LYTIC_VACUOLE_ORGANIZATION	GOBP_LYTIC_VACUOLE_ORGANIZATION	69	0.352704	1.3756	0.0368094	0.335333	0.308922	14413	tags=52%, list=25%, signal=39%	HOOK1/CLVS2/ACP3/RAB39A/LRRK2/SPG11/TMEM106B/WASHC5/ATP6AP2/PIKFYVE/CLN8/RAB14/AP3B1/ABCA1/MFSD8/CHMP5/BECN1/SCARB2/ARSB/GNPTAB/SYT7/TPCN2/MTOR/TPP1/MYO7A/ZKSCAN3/CLN6/AKTIP/MBTPS1/PPT1/HEXB/LAPTM4B/GBA/VPS18/CLN5/LYST
GOMF_ALDO_KETO_REDUCTASE_NADP_ACTIVITY	GOMF_ALDO_KETO_REDUCTASE_NADP_ACTIVITY	27	0.478224	1.53724	0.0369991	0.336581	0.310071	1862	tags=11%, list=3%, signal=11%	ADH4/AKR1D1/AKR1C4
GOBP_REGULATION_OF_TRANSLATIONAL_INITIATION_BY_EIF2_ALPHA_PHOSPHORYLATION	GOBP_REGULATION_OF_TRANSLATIONAL_INITIATION_BY_EIF2_ALPHA_PHOSPHORYLATION	10	0.680261	1.65765	0.0370904	0.336931	0.310393	16405	tags=90%, list=29%, signal=64%	DNAJC3/PPP1R15B/EIF2AK2/EIF2AK3/NPM1/EIF2AK4/TMED2/NCK1/EIF2AK1
GOBP_NEGATIVE_REGULATION_OF_VASCULAR_ENDOTHELIAL_GROWTH_FACTOR_PRODUCTION	GOBP_NEGATIVE_REGULATION_OF_VASCULAR_ENDOTHELIAL_GROWTH_FACTOR_PRODUCTION	19	-0.618585	-1.46044	0.0375	0.340167	0.313375	1846	tags=16%, list=3%, signal=15%	MIR520G/MIR15A/MIR134
GOBP_CELLULAR_RESPONSE_TO_STEROL_DEPLETION	GOBP_CELLULAR_RESPONSE_TO_STEROL_DEPLETION	16	0.558691	1.55851	0.0375714	0.34033	0.313525	14099	tags=62%, list=25%, signal=47%	SPRING1/ERLIN2/LPCAT3/INSIG1/SREBF2/AMFR/EIF2A/ERLIN1/TMED2/INSIG2
GOBP_RESPONSE_TO_STEROL	GOBP_RESPONSE_TO_STEROL	34	0.439218	1.49217	0.037746	0.341428	0.314536	9635	tags=38%, list=17%, signal=32%	CYP7A1/F7/CES1/GRAMD1C/HMGCS1/LRP6/RORA/RORC/PTCH1/TGFBR2/INSIG1/GPLD1/MIR185
GOBP_PRESYNAPSE_ORGANIZATION	GOBP_PRESYNAPSE_ORGANIZATION	49	0.382995	1.38511	0.0378889	0.342235	0.31528	9242	tags=33%, list=16%, signal=27%	LRRTM1/CEL/LRFN5/IL1RAPL2/BSN/PCLO/GPC6/PTPRD/SNCA/CBLN1/NLGN1/SLITRK5/VPS35/GPC4/LRRTM3/FZD1
GOBP_UREA_CYCLE	GOBP_UREA_CYCLE	11	0.653496	1.63802	0.0383069	0.344336	0.317215	2743	tags=27%, list=5%, signal=26%	OTC/ARG1/CPS1
GOBP_REGULATION_OF_CELLULAR_KETONE_METABOLIC_PROCESS	GOBP_REGULATION_OF_CELLULAR_KETONE_METABOLIC_PROCESS	183	0.279697	1.29952	0.0383095	0.344336	0.317215	13198	tags=36%, list=23%, signal=27%	APOA5/APOC3/APOA1/CYP7A1/PLA2G3/PPARGC1A/CES1/ABCB11/AVPR1A/PRKAA2/PDK4/MIR204/SLC22A13/FABP1/ERLIN2/PPARA/PDP1/PDP2/EGR1/PPTC7/PRKCE/CPT1A/PDK2/BHMT/GHSR/PRKAG2/IRS1/PDK1/REST/PRKAB2/SIRT1/INSIG1/CEACAM1/PDK3/APPL2/LONP2/NCOR1/MIR30C1/SIRT5/RDH10/ACADL/PSMC1/RGN/DGAT2/ACACB/ODC1/ACMSD/NR4A3/AZIN1/MTOR/PSMD7/LPGAT1/MLYCD/FABP3/PPARG/ATP2B4/FGF19/PSMD5/ERLIN1/PDPR/BMP5/PSME3/ADIPOR2/STARD4/PLIN5
GOMF_TOXIC_SUBSTANCE_BINDING	GOMF_TOXIC_SUBSTANCE_BINDING	10	0.676836	1.6493	0.0383371	0.344336	0.317215	6761	tags=30%, list=12%, signal=26%	ALB/DSG1/EPHX2
GOMF_PEPTIDE_TRANSMEMBRANE_TRANSPORTER_ACTIVITY	GOMF_PEPTIDE_TRANSMEMBRANE_TRANSPORTER_ACTIVITY	35	0.427624	1.45001	0.0383375	0.344336	0.317215	32558	tags=100%, list=57%, signal=43%	CDH17/TOMM20/SLC15A2/ABCA1/TOMM70/TMED10/TIMM17A/SEC63/TOMM20L/TOMM40L/TAP1/MCL1/DISP1/GJA1/AZGP1/SLC15A4/SLC15A1/TOMM22/ABCC5/ABCC1/TIMM22/TIMM23B/TAP2/TOMM7/TIMM23/SEC61A1/SLC13A3/SLC15A3/BLOC1S3/TAPBP/SEC61A2/SEC61G/TOMM40/ABCB9/TIMM17B
GOBP_PROTON_TRANSMEMBRANE_TRANSPORT	GOBP_PROTON_TRANSMEMBRANE_TRANSPORT	157	0.288885	1.2483	0.0384355	0.344363	0.317241	10562	tags=26%, list=19%, signal=21%	ATP6V0A4/ATP6V1G3/ATP6V0D2/SLC9A4/ATP6V1B1/SLC9A2/ATP6V1C2/SLC36A2/NNT/ATP6V1A/ATP1A1/CLCN5/MTCO2P12/ATP12A/NOX5/ATP5F1B/ATP5F1A/ATP7A/CLCN3/SLC2A9/ATP6V1C1/ATP6V1D/SLC17A5/CLCN4/SLC15A2/TMCO3/ATP2C1/NDUFA4/ATP6V1H/ATP6V1B2/ATP5PB/SLC4A10/DMAC2L/CHP1/ATP5MC3/COX10/SLC36A1/PPIF/CYB5A/SLC25A3/SLC9A3
GOMF_PEPTIDE_LYSINE_N_ACETYLTRANSFERASE_ACTIVITY	GOMF_PEPTIDE_LYSINE_N_ACETYLTRANSFERASE_ACTIVITY	45	0.409705	1.45683	0.0384486	0.344363	0.317241	12632	tags=51%, list=22%, signal=40%	CDY1B/CDY2B/GTF3C4/USP22/CLOCK/MCM3AP/KAT6A/BRPF3/NAA50/KAT2B/KAT6B/NCOA1/EP300/EPC2/NCOA3/KAT7/KAT5/BRCA2/ATF2/CREBBP/TAF1/ESCO1/HAT1
GOMF_LYS63_SPECIFIC_DEUBIQUITINASE_ACTIVITY	GOMF_LYS63_SPECIFIC_DEUBIQUITINASE_ACTIVITY	12	0.619371	1.58212	0.0386384	0.345578	0.31836	17979	tags=83%, list=32%, signal=57%	BRCC3/OTUD4/YOD1/CYLD/STAMBP/USP27X/DESI2/STAMBPL1/ATXN3/TNFAIP3
GOMF_LIGASE_ACTIVITY_FORMING_CARBON_OXYGEN_BONDS	GOMF_LIGASE_ACTIVITY_FORMING_CARBON_OXYGEN_BONDS	41	0.415886	1.44409	0.0386951	0.3456	0.31838	12303	tags=39%, list=22%, signal=31%	LARS2/DARS2/IARS2/MARS2/EPRS1/NARS2/PARS2/IARS1/EARS2/WARS2/LARS1/TARS3/NARS1/DARS1/TARS1/RARS1
GOBP_PEPTIDYL_ARGININE_N_METHYLATION	GOBP_PEPTIDYL_ARGININE_N_METHYLATION	11	0.649514	1.62803	0.0389101	0.346201	0.318934	13288	tags=55%, list=23%, signal=42%	PRMT8/PRMT5/FBXO11/PRMT9/PRMT6/PRMT3
GOMF_PROTEIN_ARGININE_N_METHYLTRANSFERASE_ACTIVITY	GOMF_PROTEIN_ARGININE_N_METHYLTRANSFERASE_ACTIVITY	11	0.649514	1.62803	0.0389101	0.346201	0.318934	13288	tags=55%, list=23%, signal=42%	PRMT8/PRMT5/FBXO11/PRMT9/PRMT6/PRMT3
GOBP_FORMATION_OF_CYTOPLASMIC_TRANSLATION_INITIATION_COMPLEX	GOBP_FORMATION_OF_CYTOPLASMIC_TRANSLATION_INITIATION_COMPLEX	16	0.554747	1.54751	0.0389252	0.346201	0.318934	15835	tags=50%, list=28%, signal=36%	EIF3L/EIF3A/EIF5/EIF3C/EIF3J/EIF3M/EIF3E/EIF3H
GOBP_VENTRAL_SPINAL_CORD_INTERNEURON_DIFFERENTIATION	GOBP_VENTRAL_SPINAL_CORD_INTERNEURON_DIFFERENTIATION	13	-0.688004	-1.51285	0.0390585	0.346587	0.319289	3957	tags=23%, list=7%, signal=21%	SOX1/DMRT3/LHX3
GOMF_NUCLEOTIDYLTRANSFERASE_ACTIVITY	GOMF_NUCLEOTIDYLTRANSFERASE_ACTIVITY	125	0.296063	1.21989	0.0390773	0.346587	0.319289	16237	tags=48%, list=29%, signal=34%	DNTT/CDS1/NMNAT2/GPHN/MAB21L1/TENT5D/POLK/CRPPA/REV3L/POLR2B/MED21/POLR1B/POLR3B/POLA1/TENT4B/RNGTT/FPGT/CDS2/PRIM1/NMNAT1/POLR1F/UAP1/POLR2M/PRIMPOL/TERC/TUT4/PAPOLA/POLR1A/REV1/POLR2A/POLR2C/TENT2/MTPAP/MOCS3/UGP2/OAS3/POLR3C/PAPOLG/PTGES3/TUT7/POLE3/PAPSS1/PNPT1/TERF1/POLH/TERF2/PCYT1A/NMNAT3/POLR3A/TRNT1/RPAP1/POLD3/POLI/POLR3F/POLR1E/PAPSS2/POLR3D/MED20/CRCP/POLG
GOBP_CARNITINE_SHUTTLE	GOBP_CARNITINE_SHUTTLE	11	0.649072	1.62693	0.0395134	0.349695	0.322153	10310	tags=64%, list=18%, signal=52%	THRSP/PRKAA2/CPT2/CPT1A/PRKAG2/PRKAB2/ACACB
GOCC_POTASSIUM_CHANNEL_COMPLEX	GOCC_POTASSIUM_CHANNEL_COMPLEX	99	0.301283	1.25027	0.0395752	0.349695	0.322153	5955	tags=19%, list=10%, signal=17%	LRRC52/KCNE5/DPP10/HCN2/KCNA1/KCNG3/DPP6/KCNIP1/KCNJ1/DLG2/GRIK5/KCNA2/KCNE1B/KCNJ11/KCNV1/KCNJ3/AKAP9/AMIGO1/KCNIP4
GOBP_UNSATURATED_FATTY_ACID_METABOLIC_PROCESS	GOBP_UNSATURATED_FATTY_ACID_METABOLIC_PROCESS	115	0.302173	1.27779	0.0395923	0.349695	0.322153	8453	tags=23%, list=15%, signal=19%	CYP2A6/CYP1A2/CYP2A7/PLA2G4F/PLA2G3/ATP6V1B1/AKR1C4/AVPR1A/HPGD/MIR204/ACSL1/CYP1A1/ELOVL7/AKR1C1/CYP2B6/SCD5/PNPLA8/EPHX2/ELOVL4/CYP4A11/CYP2U1/PLA2G4A/SIRT1/HSD17B4/CYP2J2/FADS2B
GOBP_AXONAL_TRANSPORT_OF_MITOCHONDRION	GOBP_AXONAL_TRANSPORT_OF_MITOCHONDRION	14	0.574092	1.53635	0.0397397	0.350028	0.322459	14667	tags=79%, list=26%, signal=58%	MAPT/AGBL4/HAP1/TRAK2/OPA1/NEFL/ARMCX3/TRAK1/ACTR10/HIF1A/SPAST
GOBP_MEMBRANE_REPOLARIZATION_DURING_VENTRICULAR_CARDIAC_MUSCLE_CELL_ACTION_POTENTIAL	GOBP_MEMBRANE_REPOLARIZATION_DURING_VENTRICULAR_CARDIAC_MUSCLE_CELL_ACTION_POTENTIAL	14	0.57333	1.53431	0.0397397	0.350028	0.322459	7032	tags=29%, list=12%, signal=25%	KCNE5/KCNE1B/KCNJ3/NOS1AP
GOMF_SODIUM_PROTON_ANTIPORTER_ACTIVITY	GOMF_SODIUM_PROTON_ANTIPORTER_ACTIVITY	12	0.616305	1.57428	0.0398748	0.350734	0.323109	897	tags=17%, list=2%, signal=16%	SLC9A4/SLC9A2
GOBP_CHOLESTEROL_CATABOLIC_PROCESS	GOBP_CHOLESTEROL_CATABOLIC_PROCESS	11	0.648634	1.62583	0.0401166	0.35189	0.324174	1665	tags=27%, list=3%, signal=26%	CYP7A1/CEL/AKR1D1
GOMF_ACYL_COA_DEHYDROGENASE_ACTIVITY	GOMF_ACYL_COA_DEHYDROGENASE_ACTIVITY	11	0.648473	1.62543	0.0401166	0.35189	0.324174	16956	tags=91%, list=30%, signal=64%	ACAD11/ACADSB/ACADM/ACAD8/ACADL/IVD/ACAD10/ACADS/ACAD9/GCDH
GOBP_EPITHELIAL_CELL_MORPHOGENESIS	GOBP_EPITHELIAL_CELL_MORPHOGENESIS	31	0.439259	1.44941	0.0407514	0.35664	0.32855	9700	tags=35%, list=17%, signal=29%	CNMD/GRHL2/EPB41L5/RAB25/AR/PKHD1/CLIC4/DACT2/TNMD/HEG1/MET
GOMF_PRENYLTRANSFERASE_ACTIVITY	GOMF_PRENYLTRANSFERASE_ACTIVITY	17	0.577204	1.62062	0.04077	0.35664	0.32855	14499	tags=65%, list=26%, signal=48%	PTAR1/CHM/PDSS2/NUS1/FDFT1/COX10/PGGT1B/DHDDS/UBIAD1/FDPS/COQ2
GOBP_FOLIC_ACID_CONTAINING_COMPOUND_METABOLIC_PROCESS	GOBP_FOLIC_ACID_CONTAINING_COMPOUND_METABOLIC_PROCESS	27	0.471967	1.51713	0.0409398	0.357634	0.329467	13629	tags=44%, list=24%, signal=34%	ALDH1L1/DHFRP1/SHMT1/MTHFD1/DHFR/MTHFS/DHFR2/MTRR/TYMS/SLC46A1/GGH/GART
GOBP_MEMBRANE_REPOLARIZATION	GOBP_MEMBRANE_REPOLARIZATION	43	0.388095	1.36479	0.0413185	0.360449	0.332059	7077	tags=26%, list=12%, signal=22%	KCNE5/ATP1A1/NEDD4L/AKAP6/KCNE1B/CACNA1D/ANK2/KCNJ3/AKAP9/NOS1AP/ATP1B1
GOBP_CARNITINE_METABOLIC_PROCESS	GOBP_CARNITINE_METABOLIC_PROCESS	13	0.607715	1.59104	0.0415225	0.36124	0.332788	10982	tags=85%, list=19%, signal=68%	ACADM/CPT2/TMLHE/CPT1A/ALDH9A1/SHMT1/BBOX1/ACADL/CROT/CRAT/SLC22A4
GOBP_MIDGUT_DEVELOPMENT	GOBP_MIDGUT_DEVELOPMENT	13	0.60712	1.58949	0.0415225	0.36124	0.332788	7588	tags=46%, list=13%, signal=40%	OTC/DAB1/CPS1/ALDH1A2/EGFR/EDNRB
GOBP_MRNA_METHYLATION	GOBP_MRNA_METHYLATION	16	0.550244	1.53495	0.041633	0.361708	0.333219	13891	tags=56%, list=24%, signal=43%	TRMT61B/CBLL1/METTL14/CMTR2/ZC3H13/VIRMA/TRMT10C/METTL16/METTL8
GOBP_NEGATIVE_REGULATION_OF_PROGRAMMED_NECROTIC_CELL_DEATH	GOBP_NEGATIVE_REGULATION_OF_PROGRAMMED_NECROTIC_CELL_DEATH	17	-0.629274	-1.46329	0.0417193	0.361965	0.333456	105	tags=24%, list=0%, signal=23%	NUPR1/RBCK1/MIR101-1/MIR485
GOBP_REGULATION_OF_POSTSYNAPSE_ORGANIZATION	GOBP_REGULATION_OF_POSTSYNAPSE_ORGANIZATION	87	0.326036	1.32408	0.0422819	0.366348	0.337494	11892	tags=37%, list=21%, signal=29%	LRRTM1/GRID2/ZDHHC15/MIR30B/KIF1A/EPHA4/LRRK2/PPP1R9A/HSPA8/CDKL5/PTPRD/ARMCX5-GPRASP2/GHSR/LRRTM2/CBLN1/NLGN1/CAPRIN1/OPA1/VPS35/LZTS3/ABHD17B/UBE3A/EPHA7/CDH2/ADAM10/DHX36/ACTR2/DGKB/ABI2/ABHD17C/PTEN/HOMER1
GOMF_PROTEIN_BINDING_INVOLVED_IN_HETEROTYPIC_CELL_CELL_ADHESION	GOMF_PROTEIN_BINDING_INVOLVED_IN_HETEROTYPIC_CELL_CELL_ADHESION	11	0.642742	1.61106	0.0425296	0.367914	0.338937	7129	tags=45%, list=13%, signal=40%	GLDN/DSG2/DSP/DSC2/PKP2
GOBP_TETRAHYDROFOLATE_METABOLIC_PROCESS	GOBP_TETRAHYDROFOLATE_METABOLIC_PROCESS	19	0.56746	1.66057	0.0425865	0.367914	0.338937	16298	tags=58%, list=29%, signal=41%	ALDH1L1/DHFRP1/SHMT1/MTHFD1/DHFR/MTHFS/DHFR2/TYMS/GART/MTHFR/FTCD
GOCC_CELL_BODY_MEMBRANE	GOCC_CELL_BODY_MEMBRANE	31	0.437695	1.44425	0.0426358	0.367914	0.338937	10577	tags=35%, list=19%, signal=29%	RGS8/SLC6A2/TACR3/KCNA2/FLRT1/AMIGO1/SLC12A2/P2RY12/KCNC2/CX3CR1/KCND2
GOBP_ORGANELLE_FUSION	GOBP_ORGANELLE_FUSION	143	0.289843	1.24899	0.042874	0.36947	0.34037	16475	tags=55%, list=29%, signal=39%	GRIK5/AFG3L2/STXBP6/SYT9/TBC1D4/RAB39A/USO1/PRKN/SPG11/MIGA1/VAV3/ANKFY1/STXBP1/SNCA/HUWE1/VPS41/CPLANE2/PIKFYVE/OPA1/STX17/VTI1B/MFN2/STX3/GOSR1/STX7/CHMP2B/STX12/CHMP3/KIF5B/CHCHD3/MUL1/CHP1/SYT11/VCPIP1/RAB8B/SYT7/RAB3A/TGFBRAP1/MFN1/VAMP3/PCDHGA3/USP30/TFRC/C2CD5/OMA1/SNAP23/GDAP1/EEA1/VTI1A/CLTRN/SEC22B/GNAI3/ANKRD27/DYSF/UVRAG/ENO4/SNAP29/ENO3/SAMD9/PLD6/VPS18/VPS11/PIP4K2A/ZDHHC6/SYT13/VAM…
GOCC_CCR4_NOT_COMPLEX	GOCC_CCR4_NOT_COMPLEX	16	0.546641	1.5249	0.0429869	0.369943	0.340805	13866	tags=56%, list=24%, signal=43%	CNOT1/CPEB3/CNOT6L/CNOT7/CNOT4/PATL1/CNOT6/TOB1/CNOT8
GOMF_PHOSPHOPROTEIN_BINDING	GOMF_PHOSPHOPROTEIN_BINDING	87	0.323244	1.31274	0.0435164	0.373995	0.344538	13164	tags=40%, list=23%, signal=31%	STAP1/PLCG2/TOX3/PTPN3/IGF2R/MAPK1/SNCA/RASA1/IRS1/PTPN11/YES1/PKD2/MID2/RB1/PAFAH1B1/NEDD4/SCAF8/CBL/PIK3R1/PHF6/URI1/LRP11/BTRC/BCAR3/SYK/MTOR/EPB41/SHE/MID1/ARRB1/PIK3R3/UBASH3B/YWHAB/VAV2/THRAP3
GOBP_REGULATION_OF_DEACETYLASE_ACTIVITY	GOBP_REGULATION_OF_DEACETYLASE_ACTIVITY	12	0.611736	1.56261	0.0435841	0.374072	0.34461	11053	tags=58%, list=19%, signal=47%	LRRK2/PINK1/PRKD1/KDM5A/CAMK2D/C6orf89/MAPK8
GOBP_ASPARTATE_FAMILY_AMINO_ACID_METABOLIC_PROCESS	GOBP_ASPARTATE_FAMILY_AMINO_ACID_METABOLIC_PROCESS	50	0.373856	1.36567	0.0436468	0.374107	0.344642	14339	tags=46%, list=25%, signal=34%	GNMT/SLC25A21/DLD/GOT1/OGDH/BHMT/DDO/ASRGL1/DLST/AASDHPPT/MTHFD1/MTRR/ADSS2/MTR/GOT2/MTAP/ALDH7A1/MSRA/ENOPH1/APIP/ASNSD1/PHGDH/AADAT
GOMF_STEROID_HORMONE_RECEPTOR_ACTIVITY	GOMF_STEROID_HORMONE_RECEPTOR_ACTIVITY	26	0.45187	1.43006	0.0443755	0.379614	0.349715	11376	tags=38%, list=20%, signal=31%	ESRRG/NR3C2/ABHD2/ESRRB/PGR/PPARA/NR3C1/NR4A3/PGRMC2/ESRRA
GOBP_PHOSPHATIDYLINOSITOL_PHOSPHORYLATION	GOBP_PHOSPHATIDYLINOSITOL_PHOSPHORYLATION	57	0.359913	1.35108	0.0444083	0.379614	0.349715	12591	tags=47%, list=22%, signal=37%	PIK3C2G/IMPA2/PIK3C2A/PIK3CA/SOCS7/PIP5K1B/PIK3CB/P3R3URF/SOCS6/PIK3C3/PIKFYVE/EFR3B/PI4KA/PI4K2B/CISH/IP6K3/PIP4K2C/SOCS4/BPNT1/FAM126B/PIK3R1/TTC7B/SMG1/EFR3A/SOCS5/IMPA1/PIK3R3
GOBP_RUFFLE_ASSEMBLY	GOBP_RUFFLE_ASSEMBLY	43	0.382651	1.34565	0.0444725	0.379654	0.349751	7263	tags=23%, list=13%, signal=20%	STAP1/USP17L2/ARHGAP24/RDX/AIF1L/COBL/EPS8/PFN2/P2RY12/NLGN1
GOBP_RESPONSE_TO_GRAVITY	GOBP_RESPONSE_TO_GRAVITY	10	-0.689758	-1.42418	0.0446194	0.380072	0.350137	11523	tags=50%, list=20%, signal=40%	STX1A/FOSL1/BGLAP/NOX3/MYOG
GOCC_GOLGI_ASSOCIATED_VESICLE	GOCC_GOLGI_ASSOCIATED_VESICLE	92	0.318135	1.30813	0.0446407	0.380072	0.350137	16419	tags=53%, list=29%, signal=38%	CFTR/TYR/SLC2A4/LRRK2/ATP7A/STEAP2/IGF2R/TGOLN2/CNGB1/CLTC/AFTPH/VPS41/AP1G1/RAB14/RASSF9/NCALD/PI4KA/TMED7/SYNRG/ARCN1/COPB1/ADAM10/COPA/TMED10/RAB8B/APP/SORT1/OCRL/COPG2/ZDHHC13/SPPL2A/SEC22B/RAB27B/SCFD1/TMED2/BACE1/COPB2/STK26/CCDC88A/SPG21/ITM2B/CNGA2/GOPC/PACSIN1/SPPL2C/DIPK2A/GJA1/RAB8A/ZDHHC17
GOBP_TRANSCRIPTION_INITIATION_FROM_RNA_POLYMERASE_II_PROMOTER	GOBP_TRANSCRIPTION_INITIATION_FROM_RNA_POLYMERASE_II_PROMOTER	187	0.261905	1.20285	0.0447825	0.380586	0.35061	13064	tags=32%, list=23%, signal=25%	NR0B2/PPARGC1A/RORB/ESRRG/NR3C2/THRB/TAF7L/ESRRB/HNF4G/PGR/AR/NR1D2/PPARA/CCND1/RORA/MED13/MAML2/MED1/RORC/TEAD1/POLR2B/CAND1/ZNF45/NOTCH2/KAT2B/HNF1A/CREB1/VDR/RARB/CCNC/GTF2A1/MED14/MED23/TAF4B/TAF2/PAXIP1/NR3C1/DHX36/NR4A3/WWTR1/NR2C2/THRA/ESRRA/MECP2/MAML3/CREBBP/ERCC6/PTEN/TAF1/YAP1/PPARG/TAF9B/POLR2A/POLR2C/HNF4A/ATF7IP/GTF2H1/ZNF451/GTF2H3/DR1
GOMF_RNA_7_METHYLGUANOSINE_CAP_BINDING	GOMF_RNA_7_METHYLGUANOSINE_CAP_BINDING	12	0.609114	1.55591	0.0448205	0.380586	0.35061	14523	tags=67%, list=26%, signal=50%	DCPS/GEMIN5/EIF4E3/NCBP1/CYFIP1/EIF4E/LARP1/AGO2
GOBP_NEURAL_TUBE_FORMATION	GOBP_NEURAL_TUBE_FORMATION	96	0.314559	1.29766	0.0451369	0.382255	0.352148	15660	tags=47%, list=28%, signal=34%	GRHL2/LRP2/BMP7/SHROOM3/TRIM71/COBL/SFRP1/LRP6/GRHL3/SEC24B/MIB1/ARHGAP35/PRKACB/TGFB2/LUZP1/PTCH1/OPA1/TRAF6/MTHFD1/APAF1/KIF20B/STK3/FZD3/OVOL2/SETD2/ST14/BMP5/FZD6/BBS4/RALA/GDF7/SOX11/DLC1/LIAS/HIF1A/TMED2/BCL10/CELSR1/SDC4/SPINT2/MTHFR/SPINT1/TSC1/IFT52/SUFU
GOBP_POSITIVE_REGULATION_OF_CELL_JUNCTION_ASSEMBLY	GOBP_POSITIVE_REGULATION_OF_CELL_JUNCTION_ASSEMBLY	95	0.318889	1.30635	0.0451369	0.382255	0.352148	8906	tags=27%, list=16%, signal=23%	HRG/LRRN1/GRID2/CLDN19/CLSTN2/FLRT3/FMN1/ACE2/EPB41L5/SFRP1/ADGRB3/AMIGO1/PTPRD/ARMCX5-GPRASP2/PTPRJ/LRRTM2/CBLN1/NLGN1/CRB3/SLITRK5/ROCK1/TEK/KDR/IQGAP1/ADGRL2/LRRTM3
GOMF_TRANSCRIPTION_COACTIVATOR_BINDING	GOMF_TRANSCRIPTION_COACTIVATOR_BINDING	26	0.446739	1.41383	0.0452207	0.382272	0.352164	10100	tags=42%, list=18%, signal=35%	THRB/PGR/AR/PPARA/RORA/TFAM/FOXO1/VGLL4/CREB1/CIT/SMAD4
GOBP_RENAL_WATER_HOMEOSTASIS	GOBP_RENAL_WATER_HOMEOSTASIS	38	0.417002	1.40531	0.045322	0.382272	0.352164	8604	tags=39%, list=15%, signal=34%	ATP6V1B1/AQP4/MYO5B/TFAP2B/ADCY2/ADCY1/AKAP11/RAB11FIP2/ADCY9/PRKACB/CYP4A11/PRKAR2A/AQP2/ADCY5/PRKAR1A
GOBP_EXTRACELLULAR_MATRIX_CONSTITUENT_SECRETION	GOBP_EXTRACELLULAR_MATRIX_CONSTITUENT_SECRETION	12	0.605688	1.54716	0.0454387	0.382272	0.352164	4449	tags=25%, list=8%, signal=23%	CPB2/ADTRP/TMEM38B
GOBP_REGULATION_OF_ANGIOTENSIN_LEVELS_IN_BLOOD	GOBP_REGULATION_OF_ANGIOTENSIN_LEVELS_IN_BLOOD	12	0.607934	1.5529	0.0454387	0.382272	0.352164	13666	tags=67%, list=24%, signal=51%	CES1/ACE2/ENPEP/ATP6AP2/MME/CPA3/CMA1/CTSG
GOBP_REGULATION_OF_BILE_ACID_BIOSYNTHETIC_PROCESS	GOBP_REGULATION_OF_BILE_ACID_BIOSYNTHETIC_PROCESS	12	0.603823	1.5424	0.0454387	0.382272	0.352164	2480	tags=17%, list=4%, signal=16%	CYP7A1/CES1
GOBP_RIG_I_SIGNALING_PATHWAY	GOBP_RIG_I_SIGNALING_PATHWAY	25	0.475887	1.49153	0.0456912	0.382491	0.352365	16824	tags=60%, list=30%, signal=42%	USP17L2/DDX60/ANKRD17/PUM1/PHB/PUM2/DDX58/BIRC2/SEC14L1/CLPB/LSM14A/C1QBP/RNF125/NLRX1/USP15
GOBP_ADULT_HEART_DEVELOPMENT	GOBP_ADULT_HEART_DEVELOPMENT	13	-0.652078	-1.43385	0.0456919	0.382491	0.352365	8528	tags=46%, list=15%, signal=39%	SCUBE1/APELA/MYH7/MYH6/HAND2/NKX2-5
GOMF_CARBON_CARBON_LYASE_ACTIVITY	GOMF_CARBON_CARBON_LYASE_ACTIVITY	51	0.388898	1.43581	0.0458335	0.382491	0.352365	15284	tags=59%, list=27%, signal=43%	CYP17A1/PCK1/URAD/AMD1/GOT1/DDC/SHMT1/CLYBL/ME1/ECHDC1/PDXDC1/ALDOB/ODC1/ACMSD/AZIN1/MLYCD/GGCX/HACL1/HMGCLL1/ME2/PCK2/UXS1/SGPL1/TYW1/UMPS/FAHD1/ALDOA/PAICS/HOGA1/HMGCL
GOBP_REGULATION_OF_PLASMA_LIPOPROTEIN_PARTICLE_LEVELS	GOBP_REGULATION_OF_PLASMA_LIPOPROTEIN_PARTICLE_LEVELS	96	0.314132	1.2959	0.0459084	0.382491	0.352365	815	tags=6%, list=1%, signal=6%	APOA5/ALB/APOC3/APOA2/APOA1/PLA2G3
GOBP_ASPARTATE_FAMILY_AMINO_ACID_CATABOLIC_PROCESS	GOBP_ASPARTATE_FAMILY_AMINO_ACID_CATABOLIC_PROCESS	23	0.494164	1.51772	0.0459457	0.382491	0.352365	10416	tags=35%, list=18%, signal=28%	SLC25A21/DLD/GOT1/OGDH/DDO/ASRGL1/DLST/GOT2
GOBP_GOLGI_RIBBON_FORMATION	GOBP_GOLGI_RIBBON_FORMATION	13	0.600027	1.57092	0.04596	0.382491	0.352365	14202	tags=69%, list=25%, signal=52%	TRIP11/PRMT5/TMED5/FHDC1/GCC2/MYO18A/VTI1A/GOLPH3/OPTN
GOMF_TRANSMEMBRANE_RECEPTOR_PROTEIN_TYROSINE_KINASE_ADAPTOR_ACTIVITY	GOMF_TRANSMEMBRANE_RECEPTOR_PROTEIN_TYROSINE_KINASE_ADAPTOR_ACTIVITY	13	0.599122	1.56855	0.04596	0.382491	0.352365	10337	tags=46%, list=18%, signal=38%	STAP1/IRS1/FRS2/GAB2/BLNK/PIK3R1
GOBP_ERROR_FREE_TRANSLESION_SYNTHESIS	GOBP_ERROR_FREE_TRANSLESION_SYNTHESIS	22	0.476581	1.45653	0.0460045	0.382491	0.352365	29770	tags=100%, list=52%, signal=48%	RCHY1/RFC1/RPA1/RFC3/REV1/UBB/SPRTN/POLH/VCP/RPA3/POLDIP2/RFC5/RPA2/PCNA/UBC/NPLOC4/RPS27A/RFC2/POLD1/UBA52/UFD1/RFC4
GOBP_NEGATIVE_REGULATION_OF_MUSCLE_CONTRACTION	GOBP_NEGATIVE_REGULATION_OF_MUSCLE_CONTRACTION	22	0.475895	1.45443	0.0460045	0.382491	0.352365	8381	tags=32%, list=15%, signal=27%	CALCA/MIR30E/ARHGAP42/GUCY1A1/ADRB2/CALCRL/KCNMA1
GOCC_CLUSTER_OF_ACTIN_BASED_CELL_PROJECTIONS	GOCC_CLUSTER_OF_ACTIN_BASED_CELL_PROJECTIONS	156	0.288878	1.27014	0.0461676	0.383348	0.353155	9184	tags=26%, list=16%, signal=22%	ATP6V0A4/PVALB/CALB1/SLC26A3/DAB1/LRP2/CUBN/SLC34A1/SLC26A4/ITLN1/SLC6A19/PLS1/SLC2A2/SLC5A1/MYO7B/ACE2/DCDC2/VIL1/MYO3B/ATP7A/PDZK1/SLC6A18/MYH14/ADGRV1/EPS8/SLC17A3/CAPZA2/ENPEP/SHANK2/SLC7A9/ADD3/TRPA1/LIMA1/ANKS4B/MME/ABCG2/GNA13/PEX19/CA4/MKKS/SLC22A12
GOBP_MORPHOGENESIS_OF_AN_EPITHELIAL_SHEET	GOBP_MORPHOGENESIS_OF_AN_EPITHELIAL_SHEET	58	0.350793	1.32924	0.0463066	0.383433	0.353234	15069	tags=53%, list=27%, signal=39%	BMP7/MMP12/FLRT3/ARHGAP24/MPP5/LAMA1/LRP6/ARHGAP35/CLASP2/PHLDB2/NOTCH2/FERMT1/ARHGAP12/CEACAM1/DDR1/SOS1/LIN7C/MTOR/AJUBA/PTEN/MEGF8/PDCD10/ADAM17/BMP5/RHOA/SOX11/DAG1/RREB1/PLET1/CLASP1/FERMT2
GOMF_MYOSIN_V_BINDING	GOMF_MYOSIN_V_BINDING	16	0.544258	1.51825	0.0463716	0.383433	0.353234	16458	tags=75%, list=29%, signal=53%	RAB25/RAB14/RAB3B/RAB3D/RAB3A/RAB10/RAB6A/RAB27B/RAB11A/RAB27A/RAB8A/RAB39B
GOMF_ESTROGEN_RECEPTOR_BINDING	GOMF_ESTROGEN_RECEPTOR_BINDING	41	0.405398	1.40767	0.0463749	0.383433	0.353234	14580	tags=54%, list=26%, signal=40%	PPARGC1A/SRARP/CNOT1/ZNF366/NRIP1/TACC1/STRN/MED1/NCOA1/DCAF1/LATS1/LCOR/NSD1/CTNNB1/PPARG/ARRB1/PARP1/TRIP4/NCOA6/PPARGC1B/WIPI1/RERG
GOBP_IRON_COORDINATION_ENTITY_TRANSPORT	GOBP_IRON_COORDINATION_ENTITY_TRANSPORT	14	0.564211	1.50991	0.0464185	0.383433	0.353234	1501	tags=14%, list=3%, signal=14%	HRG/HPX
GOBP_REGULATION_OF_POTASSIUM_ION_TRANSMEMBRANE_TRANSPORTER_ACTIVITY	GOBP_REGULATION_OF_POTASSIUM_ION_TRANSMEMBRANE_TRANSPORTER_ACTIVITY	60	0.371798	1.43167	0.0466299	0.384681	0.354383	10225	tags=40%, list=18%, signal=33%	LRRC52/KCNE5/MTNR1B/KCNA1/ANK3/NEDD4L/AKAP6/KCNE1B/CACNA1D/ANK2/AKAP9/AMIGO1/MIR26A1/NOS1AP/ATP1B1/KLHL24/KCNC2/CAB39/NEDD4/ALG10B/LRRC55/DLG1/OXSR1/ITGB1
GOBP_CELLULAR_RESPONSE_TO_GLUCAGON_STIMULUS	GOBP_CELLULAR_RESPONSE_TO_GLUCAGON_STIMULUS	26	0.444856	1.40787	0.0469111	0.386003	0.355601	8604	tags=42%, list=15%, signal=36%	GCGR/ARG1/CPS1/PCK1/ADCY2/ADCY1/ADCY9/PRKACB/PRKAR2A/ADCY5/PRKAR1A
GOBP_SMOOTH_MUSCLE_CELL_APOPTOTIC_PROCESS	GOBP_SMOOTH_MUSCLE_CELL_APOPTOTIC_PROCESS	26	0.444335	1.40622	0.0469111	0.386003	0.355601	13788	tags=54%, list=24%, signal=41%	APOH/MIR138-1/IL12B/MIR140/LRP6/SIRT1/MFN2/MAP2K4/PDCD4/EDN1/PPARG/ARRB1/IGF1/PDE1A
GOBP_POSITIVE_REGULATION_OF_INSULIN_SECRETION	GOBP_POSITIVE_REGULATION_OF_INSULIN_SECRETION	71	0.348685	1.34262	0.047158	0.387535	0.357012	2876	tags=13%, list=5%, signal=12%	NR0B2/CFTR/NKX6-1/CRH/OXCT1/CASR/MYRIP/PFKFB2/SLC30A8
GOBP_REGULATION_OF_RECEPTOR_MEDIATED_ENDOCYTOSIS	GOBP_REGULATION_OF_RECEPTOR_MEDIATED_ENDOCYTOSIS	104	0.309576	1.28823	0.047323	0.38839	0.3578	11309	tags=31%, list=20%, signal=25%	APOA5/APOC3/VTN/SH3GL2/PLCG2/EGF/DNAJC6/MKLN1/BMP2K/CD2AP/OPHN1/PIK3CB/SMAP1/ITGAV/WASL/LRRTM2/ANGPT1/TBC1D5/USP46/ATAD1/DAB2/MIR185/PICALM/SYT11/AAK1/CBL/MTMR2/UBQLN2/RAB21/FMR1/NUMB/SYK
GOBP_POSITIVE_REGULATION_OF_ORGANIC_ACID_TRANSPORT	GOBP_POSITIVE_REGULATION_OF_ORGANIC_ACID_TRANSPORT	36	0.396854	1.33271	0.0475564	0.389728	0.359033	12027	tags=50%, list=21%, signal=39%	PLA2G3/SLC38A3/AVPR1A/ACSL1/ACE2/AVPR1B/NTSR1/STXBP1/SLC12A2/CYP4A11/PLA2G4A/ITGB1/MAP2K6/PSEN1/RAB3GAP1/EDN1/FABP3/CLTRN
GOBP_INTESTINAL_LIPID_ABSORPTION	GOBP_INTESTINAL_LIPID_ABSORPTION	19	0.56039	1.63988	0.0477709	0.389728	0.359033	5465	tags=32%, list=10%, signal=29%	APOA5/APOA1/CEL/ABCG8/AKR1C1/LPCAT3
GOBP_P_BODY_ASSEMBLY	GOBP_P_BODY_ASSEMBLY	21	0.479528	1.43393	0.0477709	0.389728	0.359033	16463	tags=57%, list=29%, signal=41%	CNOT1/CNOT6L/CNOT7/DYNC1H1/DDX6/RC3H1/PATL1/CNOT6/NOCT/LSM14A/LIMD1/EIF4ENIF1
GOBP_VERY_LONG_CHAIN_FATTY_ACID_METABOLIC_PROCESS	GOBP_VERY_LONG_CHAIN_FATTY_ACID_METABOLIC_PROCESS	34	0.428815	1.45683	0.0477763	0.389728	0.359033	11908	tags=47%, list=21%, signal=37%	SLC27A2/ACSL1/ELOVL7/HACD3/TECRL/ABCD3/ELOVL4/HACD2/HSD17B4/ACSBG1/ACOT1/ACOX2/ACOX1/PEX2/ACOT2/ACOT4
GOBP_ZYMOGEN_ACTIVATION	GOBP_ZYMOGEN_ACTIVATION	57	0.35779	1.34312	0.0477917	0.389728	0.359033	3609	tags=14%, list=6%, signal=13%	F9/APOH/KLK1/CPB2/KLK3/PRSS12/F11/CYFIP2
GOMF_ACETYLGALACTOSAMINYLTRANSFERASE_ACTIVITY	GOMF_ACETYLGALACTOSAMINYLTRANSFERASE_ACTIVITY	47	0.37797	1.35744	0.0482217	0.392733	0.361801	15304	tags=49%, list=27%, signal=36%	GALNT17/B4GALNT2/GALNT4/GALNTL6/B3GNT10/B4GALNT1/B3GALNT1/B4GALNT3/ABO/GALNT11/GALNT15/GALNT12/CSGALNACT1/B3GNT2/B3GNT5/EXTL2/GALNT5/GALNT16/GALNT13/GALNT1/B3GNT9/CSGALNACT2/B3GNT8
GOBP_DISTAL_TUBULE_DEVELOPMENT	GOBP_DISTAL_TUBULE_DEVELOPMENT	12	0.599656	1.53175	0.0485297	0.394737	0.363647	8092	tags=33%, list=14%, signal=29%	CALB1/KLHL3/TFAP2B/PKD2
GOBP_NEGATIVE_REGULATION_OF_CIRCADIAN_RHYTHM	GOBP_NEGATIVE_REGULATION_OF_CIRCADIAN_RHYTHM	15	0.568623	1.57617	0.0489102	0.397325	0.366031	6055	tags=27%, list=11%, signal=24%	PASD1/CRH/CIPC/CRY2
GOMF_ALPHA_TUBULIN_BINDING	GOMF_ALPHA_TUBULIN_BINDING	37	0.437072	1.4716	0.0491278	0.397736	0.36641	15228	tags=59%, list=27%, signal=44%	PACRG/SLC6A2/PPARGC1A/C9orf24/SNCA/TAOK1/DIP2B/TTLL7/FAM110C/DNAL1/ARL8B/EML4/INO80/SETD2/BEX4/HSPH1/TRPV4/BBS4/EFHC2/SPAST/TBCEL/RACGAP1
GOBP_POSITIVE_REGULATION_OF_PHAGOCYTOSIS_ENGULFMENT	GOBP_POSITIVE_REGULATION_OF_PHAGOCYTOSIS_ENGULFMENT	13	0.593692	1.55433	0.0491296	0.397736	0.36641	12234	tags=54%, list=22%, signal=42%	STAP1/F2RL1/ITGA2/ANO6/APPL2/CD36/PPARG
GOMF_HIGH_DENSITY_LIPOPROTEIN_PARTICLE_BINDING	GOMF_HIGH_DENSITY_LIPOPROTEIN_PARTICLE_BINDING	12	0.599167	1.5305	0.0491479	0.397736	0.36641	439	tags=17%, list=1%, signal=17%	APOA2/APOA1
GOBP_ERROR_PRONE_TRANSLESION_SYNTHESIS	GOBP_ERROR_PRONE_TRANSLESION_SYNTHESIS	21	0.476573	1.42509	0.0492521	0.398074	0.366721	29770	tags=100%, list=52%, signal=48%	POLK/RFC1/REV3L/PRIMPOL/RPA1/RFC3/REV1/UBB/POLH/POLI/RPA3/RFC5/RPA2/PCNA/UBC/RPS27A/RFC2/UBA52/MAD2L2/POLE2/RFC4
GOBP_PROTEIN_K48_LINKED_DEUBIQUITINATION	GOBP_PROTEIN_K48_LINKED_DEUBIQUITINATION	35	0.419375	1.42204	0.0495308	0.39982	0.368329	13814	tags=57%, list=24%, signal=43%	USP37/USP17L2/USP34/MINDY2/USP8/MINDY1/USP9X/OTUB2/USP25/OTUD7A/USP33/VCPIP1/OTUD7B/OTUD4/YOD1/MINDY3/USP19/USP27X/USP7/OTUD3
GOMF_ATPASE_COUPLED_INTRAMEMBRANE_LIPID_TRANSPORTER_ACTIVITY	GOMF_ATPASE_COUPLED_INTRAMEMBRANE_LIPID_TRANSPORTER_ACTIVITY	25	0.472992	1.48245	0.0497346	0.400134	0.368618	10108	tags=48%, list=18%, signal=39%	TMEM30B/ATP11A/ATP8A1/ATP10D/ATP8B4/ATP9A/ABCB1/ATP11C/ATP11B/ABCA1/TMEM30A/ATP9B
GOBP_REGULATION_OF_CHROMATIN_SILENCING	GOBP_REGULATION_OF_CHROMATIN_SILENCING	18	0.521749	1.47853	0.0497446	0.400134	0.368618	2105	tags=22%, list=4%, signal=21%	H1-5/H1-4/H1-1/H1-3
GOMF_METAL_ION_PROTON_ANTIPORTER_ACTIVITY	GOMF_METAL_ION_PROTON_ANTIPORTER_ACTIVITY	14	0.558457	1.49451	0.0497579	0.400134	0.368618	897	tags=14%, list=2%, signal=14%	SLC9A4/SLC9A2
GOBP_POSITIVE_REGULATION_OF_CHOLESTEROL_EFFLUX	GOBP_POSITIVE_REGULATION_OF_CHOLESTEROL_EFFLUX	21	0.474202	1.41801	0.0499927	0.400243	0.368719	8879	tags=33%, list=16%, signal=28%	APOA1/PON1/CES1/ABCA8/PTCH1/SIRT1/ABCA1
GOMF_CARBOHYDRATE_KINASE_ACTIVITY	GOMF_CARBOHYDRATE_KINASE_ACTIVITY	21	0.475391	1.42156	0.0499927	0.400243	0.368719	7001	tags=29%, list=12%, signal=25%	PFKFB2/PFKM/XYLB/GALK2/GNE/KHK
GOMF_COA_HYDROLASE_ACTIVITY	GOMF_COA_HYDROLASE_ACTIVITY	21	0.475455	1.42175	0.0499927	0.400243	0.368719	6476	tags=29%, list=11%, signal=25%	BAAT/ACOT12/ACOT11/ACAA2/HIBCH/NUDT7
