# Supplementary material for: Cuproptosis-related gene DLAT serves as a prognostic biomarker for immunotherapy in clear cell renal cell carcinoma: multi-database and experimental verification
Source: Aging (Albany NY). 2023 Nov 7;15(21):12314–29. doi: 10.18632/aging.205181 (PMC10683628; doi:10.18632/aging.205181)
Supplement: Supplementary Material 5 [file aging-15-205181-s005.xlsx]

## Sheet: S5
Supplementary Material 5. GSEA signaling pathway analysis in different DLAT expression levels.
ID	Description	setSize	enrichmentScore	NES	pvalue	p.adjust	qvalues	rank	leading_edge	core_enrichment
KEGG_DRUG_METABOLISM_CYTOCHROME_P450	KEGG_DRUG_METABOLISM_CYTOCHROME_P450	71	0.646813	2.53818	6.71994e-10	1.23647e-07	9.19571e-08	5334	tags=31%, list=9%, signal=28%	UGT2B10/CYP2A6/ADH1A/ADH4/UGT2B15/CYP1A2/ADH1C/UGT2B4/CYP2A7/GSTA3/UGT2B28/CYP3A4/UGT2A3/FMO5/FMO2/UGT1A9/ADH6/AOX1/FMO1/CYP3A7/UGT1A4/CYP2B6
KEGG_METABOLISM_OF_XENOBIOTICS_BY_CYTOCHROME_P450	KEGG_METABOLISM_OF_XENOBIOTICS_BY_CYTOCHROME_P450	69	0.616018	2.40312	1.44242e-08	1.32703e-06	9.86918e-07	5334	tags=28%, list=9%, signal=25%	UGT2B10/ADH1A/ADH4/UGT2B15/CYP1A2/ADH1C/UGT2B4/GSTA3/UGT2B28/CYP3A4/AKR1C4/UGT2A3/CYP1A1/UGT1A9/ADH6/AKR1C1/CYP3A7/UGT1A4/CYP2B6
KEGG_RETINOL_METABOLISM	KEGG_RETINOL_METABOLISM	64	0.614448	2.32764	3.52063e-08	2.15932e-06	1.6059e-06	5334	tags=31%, list=9%, signal=28%	UGT2B10/CYP2A6/ADH1A/ADH4/UGT2B15/CYP1A2/ADH1C/UGT2B4/CYP2A7/UGT2B28/CYP3A4/UGT2A3/CYP1A1/ALDH1A2/UGT1A9/ADH6/RDH16/CYP3A7/UGT1A4/CYP2B6
KEGG_VALINE_LEUCINE_AND_ISOLEUCINE_DEGRADATION	KEGG_VALINE_LEUCINE_AND_ISOLEUCINE_DEGRADATION	44	0.698025	2.456	1.31156e-07	6.03317e-06	4.48691e-06	10112	tags=68%, list=18%, signal=56%	OXCT1/HMGCS2/ALDH6A1/ACAT1/ACADSB/ACADM/PCCA/EHHADH/ABAT/MMUT/AOX1/ALDH1B1/DLD/BCKDHB/AUH/HMGCS1/DBT/PCCB/ACAA2/HIBCH/HADHB/ALDH3A2/HIBADH/MCCC1/ALDH9A1/HADH/MCCC2/ACAD8/HADHA/IVD
KEGG_OLFACTORY_TRANSDUCTION	KEGG_OLFACTORY_TRANSDUCTION	384	-0.482379	-1.50931	6.68372e-07	1.82052e-05	1.35394e-05	13852	tags=41%, list=24%, signal=31%	OR6X1/OR11H4/OR9G1/OR13D1/OR52L1/OR2A25/OR2J3/OR11A1/OR52K1/OR8D4/OR5H2/OR13J1/OR2K2/OR2T27/OR4K15/OR1J4/OR4D1/OR52E8/OR56A1/OR1D5/OR8J3/OR4K14/OR52B2/OR5AR1/OR4X2/OR4M1/OR10H2/OR13F1/OR4K1/OR5I1/OR51V1/OR2B6/OR5AU1/OR52E4/OR1D4/OR6C3/OR14C36/OR2M7/OR6C65/OR4C13/OR7E24/OR13A1/OR2M4/OR10J3/OR56A5/OR10A3/OR11L1/OR4N2/OR2V2/OR6C4/GUCY2D/OR2C3/OR1E1/OR5M3/CALML6/OR6C2/OR2AT4/OR8B4/OR2Y1/OR52M1/OR1M1/…
KEGG_FATTY_ACID_METABOLISM	KEGG_FATTY_ACID_METABOLISM	42	0.664584	2.35245	6.80541e-07	1.82052e-05	1.35394e-05	9964	tags=55%, list=18%, signal=45%	ADH1A/ADH4/ADH1C/ACAT1/ACADSB/ACADM/ACSL1/EHHADH/ADH6/ALDH1B1/ACAA2/CPT2/HADHB/ALDH3A2/CPT1A/CYP4A11/ALDH9A1/HADH/ADH5/ACSL3/HADHA/ACOX1/ACADL
KEGG_COMPLEMENT_AND_COAGULATION_CASCADES	KEGG_COMPLEMENT_AND_COAGULATION_CASCADES	69	0.563279	2.19739	6.92591e-07	1.82052e-05	1.35394e-05	3449	tags=20%, list=6%, signal=19%	C8B/SERPINC1/C8A/F9/SERPIND1/F13B/KNG1/CPB2/C4BPB/F7/MBL2/SERPINA5/PROC/F11
KEGG_SYSTEMIC_LUPUS_ERYTHEMATOSUS	KEGG_SYSTEMIC_LUPUS_ERYTHEMATOSUS	136	0.43471	1.85234	1.12388e-06	2.58493e-05	1.92243e-05	2504	tags=14%, list=4%, signal=13%	C8B/C8A/H4C3/H4C6/H2BW2/H4C2/H4C4/H2BC3/H4C13/H2AC21/H3C3/H2BC10/H3C7/H2AC4/H3C11/H4C1/H3C2/H3C1/H2AC12
KEGG_STEROID_HORMONE_BIOSYNTHESIS	KEGG_STEROID_HORMONE_BIOSYNTHESIS	55	0.604296	2.18106	1.93839e-06	3.96294e-05	2.94726e-05	5879	tags=36%, list=10%, signal=33%	UGT2B10/CYP17A1/UGT2B15/UGT2B4/CYP7A1/UGT2B28/CYP3A4/AKR1D1/AKR1C4/HSD17B6/HSD11B2/UGT2A3/CYP1A1/CYP11A1/UGT1A9/AKR1C1/CYP3A7/UGT1A4/CYP7B1/HSD17B12
KEGG_PEROXISOME	KEGG_PEROXISOME	78	0.523326	2.04334	4.50552e-06	8.29015e-05	6.16544e-05	15843	tags=58%, list=28%, signal=42%	BAAT/AGXT/HAO1/HAO2/SLC27A2/ACSL1/NUDT12/EHHADH/CAT/PHYH/ABCD3/EPHX2/AGPS/PEX1/PEX3/DDO/HSD17B4/PEX7/PEX19/PEX12/ACSL3/PEX11A/ACOX2/ACOX1/FAR2/PEX2/SCP2/CROT/CRAT/ACSL4/MLYCD/HACL1/PECR/DAO/PEX13/IDH2/PXMP4/PEX10/FAR1/GNPAT/HMGCL/PEX5/SLC25A17/PEX11B/IDH1
KEGG_PROPANOATE_METABOLISM	KEGG_PROPANOATE_METABOLISM	33	0.685173	2.24125	5.00123e-06	8.36569e-05	6.22162e-05	13225	tags=73%, list=23%, signal=56%	ALDH6A1/ACAT1/ACSS3/ACADM/PCCA/EHHADH/ABAT/MMUT/SUCLG2P2/ALDH1B1/SUCLA2/SUCLG2/PCCB/HIBCH/ALDH3A2/LDHAL6A/ALDH9A1/SUCLG1/HADHA/ACACB/ACSS1/MLYCD/ACACA/ALDH7A1
KEGG_VIBRIO_CHOLERAE_INFECTION	KEGG_VIBRIO_CHOLERAE_INFECTION	54	0.578107	2.08164	6.01927e-06	9.22955e-05	6.86408e-05	6830	tags=26%, list=12%, signal=23%	ATP6V0A4/ATP6V1G3/ATP6V0D2/CFTR/ATP6V1B1/ATP6V1C2/PLCG2/ATP6V1A/MUC2/SLC12A2/ATP6V1C1/ADCY9/PRKACB/ATP6V1D
KEGG_CITRATE_CYCLE_TCA_CYCLE	KEGG_CITRATE_CYCLE_TCA_CYCLE	31	0.704308	2.28907	8.50373e-06	0.000120361	8.9513e-05	12908	tags=81%, list=23%, signal=62%	OGDHL/DLAT/IDH3A/PCK1/ACO2/SUCLG2P2/DLD/SUCLA2/SUCLG2/PDHA2/SDHC/OGDH/SDHD/ACO1/ACLY/SUCLG1/DLST/CS/PDHA1/FH/MDH1/PDHB/SDHB/PCK2/MDH2
KEGG_EPITHELIAL_CELL_SIGNALING_IN_HELICOBACTER_PYLORI_INFECTION	KEGG_EPITHELIAL_CELL_SIGNALING_IN_HELICOBACTER_PYLORI_INFECTION	68	0.527978	2.02287	1.1302e-05	0.00014854	0.00011047	13433	tags=44%, list=24%, signal=34%	ATP6V0A4/ATP6V1G3/ATP6V0D2/ATP6V1B1/ATP6V1C2/PLCG2/ATP6V1A/ATP6V1C1/ATP6V1D/EGFR/CHUK/PTPN11/ATP6V1H/ATP6V1B2/ADAM10/MET/MAPK14/MAP2K4/CXCR2/MAPK9/MAPK8/NFKB1/MAPK13/ADAM17/TJP1/JAM3/ATP6V0E2/PAK1/ATP6V1E1/CDC42
KEGG_DRUG_METABOLISM_OTHER_ENZYMES	KEGG_DRUG_METABOLISM_OTHER_ENZYMES	51	0.572678	2.06481	1.26482e-05	0.000155151	0.000115387	5294	tags=24%, list=9%, signal=21%	UGT2B10/CYP2A6/UGT2B15/UGT2B4/CYP2A7/UGT2B28/CYP3A4/CES1/UGT2A3/UGT1A9/CYP3A7/UGT1A4
KEGG_GLYCOLYSIS_GLUCONEOGENESIS	KEGG_GLYCOLYSIS_GLUCONEOGENESIS	61	0.553067	2.05576	1.54394e-05	0.000156819	0.000116628	11205	tags=44%, list=20%, signal=36%	ADH1A/ADH4/ADH1C/DLAT/G6PC/PCK1/PFKM/ADH6/ALDH1B1/DLD/PDHA2/FBP1/PKLR/ALDH3A2/LDHAL6A/ALDH9A1/PGM2/PGK1/ADH5/BPGM/PGAM1/PDHA1/ALDOB/G6PC2/ACSS1/ADH1B/PDHB
KEGG_PORPHYRIN_AND_CHLOROPHYLL_METABOLISM	KEGG_PORPHYRIN_AND_CHLOROPHYLL_METABOLISM	41	0.621153	2.177	1.5859e-05	0.000156819	0.000116628	10242	tags=41%, list=18%, signal=34%	UGT2B10/UGT2B15/UGT2B4/UGT2B28/UGT2A3/UGT1A9/UGT1A4/FECH/EPRS1/UGT1A6/ALAS1/HCCS/UGT1A1/EARS2/UGT2B7/COX10/UGT2A1
KEGG_PPAR_SIGNALING_PATHWAY	KEGG_PPAR_SIGNALING_PATHWAY	69	0.507403	1.97941	1.60127e-05	0.000156819	0.000116628	10286	tags=36%, list=18%, signal=30%	APOA5/APOC3/APOA2/APOA1/CYP7A1/HMGCS2/ACADM/SLC27A2/ACSL1/PCK1/EHHADH/FABP1/GK/PPARA/SCD5/CPT2/CPT1A/CYP4A11/PDPK1/ACSL3/ME1/ACOX2/ACOX1/ACADL/SCP2
KEGG_TYROSINE_METABOLISM	KEGG_TYROSINE_METABOLISM	42	0.605034	2.14166	1.61933e-05	0.000156819	0.000116628	5941	tags=26%, list=10%, signal=23%	ADH1A/ADH4/TAT/ADH1C/TYR/TYRP1/ADH6/AOX1/PNMT/GOT1/DDC
KEGG_PYRUVATE_METABOLISM	KEGG_PYRUVATE_METABOLISM	40	0.608257	2.11597	2.40475e-05	0.000221237	0.000164536	13225	tags=62%, list=23%, signal=48%	ACOT12/ACAT1/DLAT/LDHD/PCK1/ALDH1B1/DLD/PDHA2/PKLR/ALDH3A2/LDHAL6A/ALDH9A1/ME1/PDHA1/ACACB/GLO1/MDH1/ACSS1/PDHB/ME2/PCK2/ACACA/MDH2/GRHPR/ALDH7A1
KEGG_ASCORBATE_AND_ALDARATE_METABOLISM	KEGG_ASCORBATE_AND_ALDARATE_METABOLISM	25	0.72325	2.22706	2.705e-05	0.00023701	0.000176266	9069	tags=52%, list=16%, signal=44%	UGT2B10/UGT2B15/UGT2B4/UGT2B28/UGT2A3/UGT1A9/ALDH1B1/UGT1A4/ALDH3A2/UGT1A6/ALDH9A1/UGT1A1/UGT2B7
KEGG_PENTOSE_AND_GLUCURONATE_INTERCONVERSIONS	KEGG_PENTOSE_AND_GLUCURONATE_INTERCONVERSIONS	28	0.670238	2.11609	8.59842e-05	0.000719141	0.00053483	9069	tags=43%, list=16%, signal=36%	UGT2B10/UGT2B15/UGT2B4/UGT2B28/UGT2A3/UGT1A9/XYLB/UGT1A4/UGT1A6/CRYL1/UGT1A1/UGT2B7
KEGG_LYSOSOME	KEGG_LYSOSOME	121	0.393771	1.6565	0.000164691	0.00131753	0.000979855	15823	tags=50%, list=28%, signal=36%	ATP6V0A4/ATP6V0D2/CTSK/ASAH1/IDS/IGF2R/M6PR/LIPA/SLC17A5/CLTC/PSAPL1/AP1G1/GALC/GNS/LGMN/ACP5/ATP6V1H/LAMP2/AP3B1/CTSO/MFSD8/AP3M1/SCARB2/CD164/HYAL1/GGA2/ARSB/PSAP/GNPTAB/GLB1/SORT1/DNASE2B/MANBA/TPP1/AP4E1/FUCA1/NPC1/ARSG/PPT1/HEXB/AP1S2/SUMF1/LAPTM4B/GM2A/CTSG/AP3S2/GBA/CTSF/ATP6V0A1/CLN5/CTSS/AP3D1/NAPSA/SLC11A2/LAMP1/AP3M2/ATP6V0A2/CTSL/NAGA/ATP6V0D1/AGA
KEGG_ENDOCYTOSIS	KEGG_ENDOCYTOSIS	181	0.334436	1.44998	0.000369774	0.00283493	0.00210836	13587	tags=43%, list=24%, signal=33%	SH3GL2/ADRB1/KIT/EGF/EPN3/RAB11FIP1/ERBB4/NEDD4L/DNAJC6/WWP1/HSPA8/USP8/IGF1R/RAB11FIP2/ASAP2/PIP5K1B/SMAP1/RAB11FIP4/VPS4B/STAM2/IQSEC3/CLTC/GIT2/EGFR/ITCH/PIKFYVE/AGAP1/KDR/ADRB2/RABEP1/EPN2/ACAP2/AP2B1/STAM/RAB11FIP5/ARAP2/TRAF6/PDCD6IP/CHMP2B/CHMP3/NEDD4/PARD3/DAB2/PARD6B/VTA1/CHMP5/MET/FLT1/FGFR2/PRKCI/CBL/CXCR2/PRKCZ/VPS36/PSD3/RBSN/RAB4A/VPS37A/CHMP1B/GRK1/PLD1/TFRC/EEA1/EPS15/ARAP1/RNF41/…
KEGG_PROSTATE_CANCER	KEGG_PROSTATE_CANCER	89	0.412491	1.65164	0.000421984	0.0031058	0.00230981	13057	tags=48%, list=23%, signal=37%	KLK3/EGF/AR/BCL2/PIK3CA/CCND1/IGF1R/PIK3CB/MAPK1/PDGFC/NRAS/SOS2/EGFR/CHUK/BRAF/AKT3/PDGFD/RAF1/FOXO1/PDPK1/ERBB2/EP300/RB1/CREB1/SRD5A2/SOS1/GSK3B/KRAS/TGFA/CTNNB1/FGFR2/HSP90AA1/PIK3R1/CREB3L2/NFKB1/CREB5/MTOR/CREBBP/PTEN/HSP90AB1/PIK3R3/CDKN1B/IGF1
KEGG_ENDOMETRIAL_CANCER	KEGG_ENDOMETRIAL_CANCER	52	0.507396	1.81317	0.000593424	0.00419961	0.00312328	12591	tags=52%, list=22%, signal=40%	CTNNA2/EGF/CDH1/PIK3CA/APC/CCND1/PIK3CB/MAPK1/NRAS/SOS2/CTNNA3/EGFR/BRAF/AKT3/FOXO3/RAF1/PDPK1/ERBB2/SOS1/GSK3B/KRAS/CTNNB1/PIK3R1/PTEN/APC2/CTNNA1/PIK3R3
KEGG_LYSINE_DEGRADATION	KEGG_LYSINE_DEGRADATION	44	0.535127	1.88285	0.000751021	0.00511807	0.00380634	13225	tags=55%, list=23%, signal=42%	OGDHL/ACAT1/EHHADH/ALDH1B1/ASH1L/TMLHE/OGDH/ALDH3A2/SETD7/ALDH9A1/SETMAR/HADH/AASDH/BBOX1/DLST/AASDHPPT/SETDB2/NSD1/HADHA/SETD2/SETDB1/KMT5B/NSD3/ALDH7A1
KEGG_RENAL_CELL_CARCINOMA	KEGG_RENAL_CELL_CARCINOMA	70	0.433839	1.72678	0.000978108	0.00642756	0.00478022	15543	tags=57%, list=27%, signal=42%	PAK5/ARNT2/EGLN1/PAK6/PIK3CA/PIK3CB/MAPK1/NRAS/SOS2/TGFB2/BRAF/PTPN11/AKT3/GAB1/RAF1/EP300/SOS1/KRAS/MET/TGFA/FH/PIK3R1/ETS1/PAK2/ARNT/CREBBP/EPAS1/PIK3R3/RAPGEF1/PAK1/CDC42/CUL2/HIF1A/RAP1B/ARAF/MAP2K1/CRKL/AKT1/CRK/RAP1A
KEGG_INOSITOL_PHOSPHATE_METABOLISM	KEGG_INOSITOL_PHOSPHATE_METABOLISM	54	0.472181	1.70022	0.00165961	0.0105299	0.00783118	14781	tags=50%, list=26%, signal=37%	PIK3C2G/INPP5J/PLCG2/ALDH6A1/IMPA2/PIK3C2A/PIK3CA/PIP5K1B/PIK3CB/IPPK/PLCB1/PLCZ1/PIK3C3/PIKFYVE/PI4KA/SYNJ1/PLCD4/PIP4K2C/INPP4B/OCRL/PTEN/IMPA1/INPP4A/IPMK/PIP4K2A/MINPP1/INPP5A
KEGG_UBIQUITIN_MEDIATED_PROTEOLYSIS	KEGG_UBIQUITIN_MEDIATED_PROTEOLYSIS	135	0.349021	1.51094	0.00226005	0.0137234	0.0102062	13761	tags=40%, list=24%, signal=30%	UBE2U/UBE2QL1/NEDD4L/KLHL13/UBE4A/CUL5/PRKN/WWP1/FBXW11/RCHY1/CUL3/ANAPC1/KLHL9/PIAS1/HERC1/BIRC6/TRIP12/HUWE1/ITCH/UBR5/UBE4B/UBE3C/UBE3A/MAP3K1/TRAF6/DDB1/TRIM32/NEDD4/UBE2E1/CUL4B/CDC23/UBE2D3/UBE2G1/UBE2Q2/CBL/UBE2W/BIRC2/BTRC/ERCC8/WWP2/UBE2K/CUL4A/XIAP/MID1/TRIM37/HERC2/CDC27/UBE3B/UBA3/FBXW8/SKP1/CUL2/RHOBTB2/BRCA1
KEGG_STARCH_AND_SUCROSE_METABOLISM	KEGG_STARCH_AND_SUCROSE_METABOLISM	52	0.473445	1.69185	0.00231209	0.0137234	0.0102062	10520	tags=38%, list=19%, signal=31%	UGT2B10/UGT2B15/UGT2B4/UGT2B28/MGAM/G6PC/GBA3/UGT2A3/UGT1A9/AGL/UGT1A4/GYS2/UGT1A6/PGM2/UGT1A1/UGT2B7/GBE1/UGT2A1/ENPP1/G6PC2
KEGG_ARGININE_AND_PROLINE_METABOLISM	KEGG_ARGININE_AND_PROLINE_METABOLISM	54	0.460861	1.65946	0.00242557	0.013947	0.0103725	12003	tags=48%, list=21%, signal=38%	OTC/ARG1/CKMT2/CKMT1B/CPS1/CKMT1A/ALDH1B1/AMD1/GATM/GOT1/GLUD2/ALDH3A2/AGMAT/ALDH9A1/ALDH4A1/CKB/GLUD1/GOT2/GLS/ODC1/MAOB/NAGS/OAT/P4HA1/PRODH/LAP3
KEGG_AMINOACYL_TRNA_BIOSYNTHESIS	KEGG_AMINOACYL_TRNA_BIOSYNTHESIS	41	0.497209	1.74261	0.00292725	0.0163217	0.0121385	12303	tags=44%, list=22%, signal=34%	LARS2/DARS2/IARS2/MARS2/EPRS1/NARS2/PARS2/SEPSECS/IARS1/EARS2/WARS2/LARS1/TARS3/NARS1/DARS1/TARS1/MTFMT/RARS1
KEGG_BUTANOATE_METABOLISM	KEGG_BUTANOATE_METABOLISM	34	0.498593	1.62983	0.003781	0.0204619	0.0152176	7882	tags=44%, list=14%, signal=38%	OXCT1/HMGCS2/ACAT1/L2HGDH/EHHADH/ABAT/ALDH1B1/ALDH5A1/BDH1/HMGCS1/PDHA2/ALDH3A2/ACSM3/ALDH9A1/HADH
KEGG_BIOSYNTHESIS_OF_UNSATURATED_FATTY_ACIDS	KEGG_BIOSYNTHESIS_OF_UNSATURATED_FATTY_ACIDS	22	0.563624	1.64772	0.00861005	0.0452643	0.0336634	12888	tags=50%, list=23%, signal=39%	BAAT/SCD5/HSD17B12/HACD2/ACOT1/HADHA/ACOX1/YOD1/ACOT2/ACOT4/PECR
KEGG_PRION_DISEASES	KEGG_PRION_DISEASES	35	0.465626	1.55997	0.00960537	0.0490941	0.0365116	6792	tags=20%, list=12%, signal=18%	C8B/C8A/C5/C6/EGR1/MAPK1/PRKACB
KEGG_ERBB_SIGNALING_PATHWAY	KEGG_ERBB_SIGNALING_PATHWAY	87	0.353396	1.40204	0.0124787	0.0620563	0.0461517	11413	tags=39%, list=20%, signal=31%	PAK5/PLCG2/EGF/ERBB4/NRG1/PAK6/PIK3CA/BTC/NRG2/PIK3CB/MAPK1/NRAS/SOS2/EGFR/BRAF/AKT3/GAB1/RAF1/ERBB2/CAMK2D/NRG3/SOS1/GSK3B/KRAS/NRG4/TGFA/MAP2K4/CBL/PIK3R1/PRKCA/MAPK9/MAPK8/PAK2/MTOR
KEGG_PRIMARY_BILE_ACID_BIOSYNTHESIS	KEGG_PRIMARY_BILE_ACID_BIOSYNTHESIS	16	0.646808	1.83782	0.0142237	0.0673231	0.0500686	5821	tags=38%, list=10%, signal=34%	BAAT/CYP7A1/AKR1D1/AKR1C4/CYP7B1/CYP39A1
KEGG_ADHERENS_JUNCTION	KEGG_ADHERENS_JUNCTION	73	0.372087	1.45397	0.0142696	0.0673231	0.0500686	15618	tags=60%, list=27%, signal=44%	CTNNA2/NECTIN3/CDH1/IGF1R/MAPK1/PTPRB/LMO7/WASL/PTPRJ/SSX2IP/FER/CTNNA3/EGFR/TGFBR2/YES1/FARP2/ERBB2/EP300/AFDN/IQGAP1/PARD3/MET/WASF2/CTNNB1/SMAD4/PTPRM/PTPRF/SMAD2/CREBBP/TJP1/CSNK2A1/CTNNA1/RHOA/CDC42/TGFBR1/ACP1/SORBS1/INSR/NLK/CSNK2A2/SMAD3/MAP3K7/WASF1/WASF3
KEGG_PROXIMAL_TUBULE_BICARBONATE_RECLAMATION	KEGG_PROXIMAL_TUBULE_BICARBONATE_RECLAMATION	23	0.538412	1.56444	0.016722	0.0768607	0.0571618	10749	tags=57%, list=19%, signal=46%	SLC38A3/ATP1A1/SLC4A4/CA2/ATP1B4/PCK1/GLUD2/ATP1B1/CA4/GLUD1/SLC9A3/MDH1/GLS
KEGG_GLYOXYLATE_AND_DICARBOXYLATE_METABOLISM	KEGG_GLYOXYLATE_AND_DICARBOXYLATE_METABOLISM	15	0.611129	1.6964	0.0171266	0.0768607	0.0571618	13088	tags=60%, list=23%, signal=46%	HAO1/HAO2/ACO2/ACO1/MTHFD1/CS/MDH1/MDH2/GRHPR
KEGG_NON_HOMOLOGOUS_END_JOINING	KEGG_NON_HOMOLOGOUS_END_JOINING	13	0.634912	1.6997	0.0190904	0.0836341	0.0621993	14719	tags=69%, list=26%, signal=51%	DNTT/RAD50/NHEJ1/PRKDC/XRCC5/LIG4/XRCC6/MRE11/XRCC4
KEGG_TRYPTOPHAN_METABOLISM	KEGG_TRYPTOPHAN_METABOLISM	39	0.43115	1.46347	0.0227796	0.0974754	0.0724932	10885	tags=44%, list=19%, signal=35%	CYP1A2/OGDHL/ACAT1/CYP1A1/EHHADH/CAT/AOX1/ALDH1B1/DDC/OGDH/ALDH3A2/ALDH9A1/HADH/WARS2/HADHA/ACMSD/MAOB
KEGG_NON_SMALL_CELL_LUNG_CANCER	KEGG_NON_SMALL_CELL_LUNG_CANCER	54	0.384741	1.38537	0.0266192	0.108752	0.0808794	10572	tags=43%, list=19%, signal=35%	PLCG2/EGF/PIK3CA/CCND1/PIK3CB/MAPK1/NRAS/SOS2/EGFR/BRAF/AKT3/FOXO3/RAF1/PDPK1/ERBB2/RB1/RARB/SOS1/KRAS/TGFA/CDK6/PIK3R1/PRKCA
KEGG_OXIDATIVE_PHOSPHORYLATION	KEGG_OXIDATIVE_PHOSPHORYLATION	132	0.292906	1.27252	0.0269752	0.108752	0.0808794	6830	tags=13%, list=12%, signal=11%	ATP6V0A4/ATP6V1G3/ATP6V0D2/ATP6V1B1/ATP6V1C2/ATP4B/ATP6V1A/ATP12A/NDUFS1/ATP5F1B/ATP5F1A/UQCRFS1/UQCRC2/SDHC/ATP6V1C1/SDHD/ATP6V1D
KEGG_ALANINE_ASPARTATE_AND_GLUTAMATE_METABOLISM	KEGG_ALANINE_ASPARTATE_AND_GLUTAMATE_METABOLISM	32	0.443114	1.44787	0.0271879	0.108752	0.0808794	10749	tags=47%, list=19%, signal=38%	AGXT/CPS1/ABAT/ALDH5A1/AGXT2/GOT1/GLUD2/DDO/GFPT1/ALDH4A1/PPAT/ADSS2/GLUD1/GOT2/GLS
KEGG_GLYCINE_SERINE_AND_THREONINE_METABOLISM	KEGG_GLYCINE_SERINE_AND_THREONINE_METABOLISM	31	0.469204	1.52496	0.0289771	0.113442	0.0843679	14279	tags=52%, list=25%, signal=39%	AGXT/GNMT/DMGDH/DLD/CHDH/GATM/AGXT2/BHMT/ALAS1/SHMT1/CTH/MAOB/GLDC/PSPH/DAO/PHGDH
KEGG_NICOTINATE_AND_NICOTINAMIDE_METABOLISM	KEGG_NICOTINATE_AND_NICOTINAMIDE_METABOLISM	24	0.476474	1.42381	0.0323333	0.123944	0.0921782	15087	tags=54%, list=27%, signal=40%	NNT/NMNAT2/NUDT12/AOX1/NT5C1B/NT5C2/NT5C1A/NMNAT1/ENPP1/ENPP3/NAMPT/NMNAT3/NT5C3A
KEGG_PANCREATIC_CANCER	KEGG_PANCREATIC_CANCER	70	0.343679	1.36793	0.0393825	0.145113	0.107921	14512	tags=54%, list=26%, signal=40%	EGF/PIK3CA/CCND1/PIK3CB/MAPK1/TGFB2/EGFR/CHUK/BRAF/AKT3/TGFBR2/RALBP1/RAF1/JAK1/ERBB2/RB1/KRAS/TGFA/SMAD4/CDK6/PIK3R1/MAPK9/RALB/BRCA2/MAPK8/SMAD2/NFKB1/PLD1/PIK3R3/STAT1/CDK4/RALA/CDC42/TGFBR1/MAPK10/STAT3/ARAF/MAP2K1
KEGG_COLORECTAL_CANCER	KEGG_COLORECTAL_CANCER	62	0.346924	1.3126	0.0400823	0.145113	0.107921	15329	tags=55%, list=27%, signal=40%	BCL2/PIK3CA/APPL1/APC/CCND1/PIK3CB/MAPK1/MSH3/CYCS/TGFB2/BRAF/AKT3/TGFBR2/RAF1/GSK3B/KRAS/MSH2/CTNNB1/SMAD4/MSH6/PIK3R1/MAPK9/MAPK8/SMAD2/APC2/PIK3R3/RHOA/TGFBR1/MAPK10/ARAF/MAP2K1/MLH1/SMAD3/AKT1
KEGG_ONE_CARBON_POOL_BY_FOLATE	KEGG_ONE_CARBON_POOL_BY_FOLATE	17	0.51761	1.48016	0.0402214	0.145113	0.107921	16298	tags=65%, list=29%, signal=46%	ALDH1L1/SHMT1/MTHFD1/DHFR/MTHFS/MTR/TYMS/MTFMT/GART/MTHFR/FTCD
KEGG_ABC_TRANSPORTERS	KEGG_ABC_TRANSPORTERS	44	0.397142	1.39735	0.0431872	0.150387	0.111844	8879	tags=27%, list=16%, signal=23%	CFTR/ABCB5/ABCB11/ABCC4/ABCG8/ABCA8/ABCB1/ABCD3/ABCB10/ABCB7/ABCG2/ABCA1
KEGG_PHOSPHATIDYLINOSITOL_SIGNALING_SYSTEM	KEGG_PHOSPHATIDYLINOSITOL_SIGNALING_SYSTEM	76	0.344382	1.33151	0.0433181	0.150387	0.111844	12591	tags=41%, list=22%, signal=32%	PIK3C2G/INPP5J/PLCG2/DGKI/CDS1/ITPR2/IMPA2/PIK3C2A/PIK3CA/ITPR1/PIP5K1B/PIK3CB/IPPK/PLCB1/PLCZ1/PIK3C3/PIKFYVE/PI4KA/SYNJ1/CDS2/PLCD4/PIP4K2C/PIK3R1/PRKCA/DGKB/INPP4B/OCRL/PTEN/DGKH/IMPA1/PIK3R3
KEGG_SPLICEOSOME	KEGG_SPLICEOSOME	127	0.284616	1.21717	0.0478384	0.163005	0.121228	40710	tags=100%, list=72%, signal=28%	HSPA8/CDC40/SNRPD3/AQR/PRPF8/SF3A1/DDX46/SNRNP200/DHX15/CRNKL1/NCBP1/PRPF40A/BCAS2/SLU7/CDC5L/PRPF18/SF3B3/PRPF4/WBP11/PCBP1/PLRG1/HNRNPU/RBMX/HSPA1L/DHX8/HNRNPK/DDX42/CHERP/SRSF8/PPIL1/ZMAT2/SF3A3/DHX38/THOC2/PRPF38A/SNRNP40/SF3B1/SMNDC1/DDX23/RBM22/TRA2B/SF3B2/HNRNPM/SRSF1/RBM8A/SNRNP27/HNRNPA3/HSPA2/HNRNPC/HNRNPA1/EFTUD2/SRSF10/SNW1/LSM3/SRSF3/SYF2/EIF4A3/U2SURP/SRSF9/NCBP2/DDX5/DHX16/PHF5A/PR…
